# Supplementary material for: Molecular and epigenetic responses to crowding stress in rainbow trout (Oncorhynchus mykiss) skeletal muscle
Source: Front Endocrinol (Lausanne). 2025 Apr 16;16:1571111. doi: 10.3389/fendo.2025.1571111 (PMC12040688; doi:10.3389/fendo.2025.1571111)
Supplement: Supplementary file 1 [file Table1.xlsx]

## Sheet: sup1
Table S1: List of kits used for physiological and oxidative stress parameters
Measured parameter	Commercial kit name	Manufacturer	Catalog number
Cortisol	Cortisol ELISA Kit	Cayman Chemical, Ann Arbor, MI, USA	500360
Creatine kinase activity	Creatine Kinase Assay Kit	Abcam, Cambridge, UK	155901
Glucose	Glucose Assay Kit	Abcam, Cambridge, UK	136955
DNA oxidative damage	OxiSelect Oxidative DNA Damage Quantification	Cell Biolabs, San Diego, CA, USA	STA-320
Protein carbonylation	OxiSelect Protein Carbonyl Spectrophotometric Assay	Cell Biolabs, San Diego, CA, USA	STA-310
Lipid peroxidation	OxiSelect HNE Adduct Competitive ELISA Kit	Cell Biolabs, San Diego, CA, USA	STA-838
Skeletal muscle catalase (CAT) activity	Abcam catalase	Abcam, Cambridge, UK	ab83464
Superoxide dismutase (SOD) activity	Superoxide dismutase Activity Assay Kit	Abcam, Cambridge, UK	ab65354

## Sheet: sup2
Table S2: Primer sequences for qPCR assay
Gene name	GeneID	Foward sequence (5´-3´)	Reverse sequence (5´-3´)	Tm (°C)	Amplicon (bp)	Efficiency (%)
Bcl-2 interacting protein 3 (bnip3)	ENSOMYG00000019362	GGGGGCAACTTCAGAATCCA	AAAGCGAGAGGAACATGGCA	60	156	1.01
Autophagy Related 9B (atg9b)	ENSOMYG00000028292	CAAGTACAAGCGAGCAGGGA	CCTGATGACCTCGGTGTAGC	60	151	1
RAF proto-oncogene serine/threonine-protein kinase (raf1a)	ENSOMYG00000037086	GAGACTTCGAAGGAACCGCA	ATCTCCTCTTCGGGGAGGTC	60	156	0.98
Phosphodiesterase 3B (pde3b)	ENSOMYG00000028505	AGCTGACTTCCTCACCAAGC	GCCTCCATACTGGGCATGTT	60	153	1.02
Brahma-related gene 1 (brg1)	ENSOMYG00000010588	CCCAGGAGAACATGCACACT	GCACTTCTCTCCATGGCACT	61	160	1.02
Metastasis-associated protein 2 (mta2)	ENSOMYG00000002584	ATGGCTCCTGGTAACAAGCC	AGATCCAGCAGGATGCACAC	60	151	1.02
40S ribosomal protein S30 (fau)	ENSOMYG00000044107	CATTTAGGAGTTGGCGTTGG	CCAAGGTTGAAAAGCAGGAG	60	134	1
beta-actin (actβ)	ENSOMYG00000050803	GCCGGCCGCGACCTCACAGACTAC	CGGCCGTGGTGGTGAAGCTGTAGC	61	100	1

## Sheet: sup3
Table S3: Summary of the RNA-seq data.
Name	Number of reads	Avg.length	Total number of reads after trim	Percentage trimmed (%)	Avg.length after trim	GC content %	Mapping rate
LD 1	54417314	101	53504316	99.98	100.67	48.6	80.35
LD 2	61509806	101	60598920	99.98	100.76	47.2	82.46
LD 3	48703772	101	47790750	99.97	100.32	48.3	82.22
HD 1	53524650	101	52614862	99.98	100.71	49.3	85.35
HD 2	58841502	101	57926215	99.97	100.44	47.2	81.32
HD 3	58696858	101	57788933	99.99	100.59	48.1	83.84
Total	335693902	101	330223996	99.9783	100.582	48.1167	82.59

## Sheet: sup4
Table S4: Complete list of differentially expressed genes in LD vs. HD groups
Name	Chromosome	Region	Max group mean	Log₂ fold change	Fold change	P-value	FDR p-value	Bonferroni	Gene ID	ENSEMBL	Biotype
fbxo32	2	11227636..11241157	625.008	8.10218	274.788	1.24903e-45	3.18029e-41	4.60081e-41	ENSOMYG00000074461	ENSOMYG00000074461	protein_coding
gene:ENSOMYG00000076140	7	complement(27780884..27785030)	1.15863	8.00681	257.212	0.000960658	0.0101621	1	ENSOMYG00000076140	ENSOMYG00000076140	protein_coding
fgg_1	10	60995368..61000675	2.03195	7.89114	237.394	0.0011514	0.0116501	1	ENSOMYG00000017796	ENSOMYG00000017796	protein_coding
coch	19	complement(33536997..33541497)	1.32534	7.77056	218.359	0.00218315	0.0189265	1	ENSOMYG00000036724	ENSOMYG00000036724	protein_coding
rasgrp3_2	23	20691619..20710220	0.624195	7.13614	140.667	0.00292366	0.0236625	1	ENSOMYG00000031946	ENSOMYG00000031946	protein_coding
gene:ENSOMYG00000041512	2	complement(79976638..79978095)	1.03435	6.94307	123.047	0.00481981	0.0344048	1	ENSOMYG00000041512	ENSOMYG00000041512	protein_coding
gene:ENSOMYG00000001330	6	complement(51524322..51563376)	0.598605	6.6468	100.204	0.00596597	0.0401441	1	ENSOMYG00000001330	ENSOMYG00000001330	protein_coding
gene:ENSOMYG00000076866	19	64553194..64555461	1.56284	6.15488	71.2533	1.81533e-05	0.000447453	0.668677	ENSOMYG00000076866	ENSOMYG00000076866	protein_coding
antiprot1	4	32121260..32123835	4.51183	5.92496	60.7561	6.68046e-08	4.58485e-06	0.00246075	ENSOMYG00000010547	ENSOMYG00000010547	protein_coding
zgc:195001_2	13	complement(48706166..48724636)	22.7756	5.7578	54.1092	1.01641e-08	9.30928e-07	0.000374394	ENSOMYG00000014671	ENSOMYG00000014671	protein_coding
fgb_1	9	complement(2813708..2824040)	2.14429	5.58718	48.0737	5.46324e-06	0.000171947	0.201239	ENSOMYG00000017143	ENSOMYG00000017143	protein_coding
gene:ENSOMYG00000038527	12	complement(51094227..51113950)	0.63866	5.5562	47.0524	0.000634392	0.00729579	1	ENSOMYG00000038527	ENSOMYG00000038527	protein_coding
apoc2	2	22372195..22378150	2.1067	5.42339	42.9144	0.000258618	0.00367079	1	ENSOMYG00000029565	ENSOMYG00000029565	protein_coding
grin2bb	13	13994528..14088769	0.407518	5.3243	40.0658	0.000175525	0.00270043	1	ENSOMYG00000017693	ENSOMYG00000017693	protein_coding
gene:ENSOMYG00000011152	5	92921138..92931601	4.57021	5.23387	37.6316	7.99987e-08	5.22289e-06	0.00294675	ENSOMYG00000011152	ENSOMYG00000011152	protein_coding
fga_1	9	2798735..2803007	1.35707	5.02841	32.6364	0.000695893	0.00783326	1	ENSOMYG00000053733	ENSOMYG00000053733	protein_coding
SLC43A2_1	24	7669875..7692247	26.6638	4.98955	31.769	6.1875e-21	3.93865e-17	2.27917e-16	ENSOMYG00000028378	ENSOMYG00000028378	protein_coding
agt	20	complement(27292330..27295911)	0.646775	4.97152	31.3745	0.000464994	0.00577685	1	ENSOMYG00000041877	ENSOMYG00000041877	protein_coding
gene:ENSOMYG00000044586	1	complement(88131484..88144937)	10.7306	4.9264	30.4085	1.08973e-09	1.41674e-07	4.01403e-05	ENSOMYG00000044586	ENSOMYG00000044586	protein_coding
gene:ENSOMYG00000033603	13	2641028..2646820	1.0497	4.8875	29.5994	0.000293382	0.00406868	1	ENSOMYG00000033603	ENSOMYG00000033603	protein_coding
gene:ENSOMYG00000010101	5	complement(90820685..90932169)	0.192605	4.87124	29.2678	0.00132488	0.0128904	1	ENSOMYG00000010101	ENSOMYG00000010101	protein_coding
zgc:195001_1	12	complement(81453879..81455589)	4.17709	4.86123	29.0653	3.49847e-07	1.84046e-05	0.0128866	ENSOMYG00000016301	ENSOMYG00000016301	protein_coding
dap3_3	3	8872612..8878558	1.26177	4.85296	28.8992	0.00119518	0.0119857	1	ENSOMYG00000002465	ENSOMYG00000002465	protein_coding
cfh	5	90756155..90979078	0.766736	4.83576	28.5568	1.83371e-06	7.03163e-05	0.0675449	ENSOMYG00000009965	ENSOMYG00000009965	protein_coding
gene:ENSOMYG00000064619	23	16845276..16848243	1.54524	4.77838	27.4433	0.00148675	0.0141728	1	ENSOMYG00000064619	ENSOMYG00000064619	protein_coding
slc2a3a_1	18	39030321..39051607	0.701206	4.67913	25.6188	0.00190128	0.0169921	1	ENSOMYG00000044559	ENSOMYG00000044559	protein_coding
gene:ENSOMYG00000002413	3	13518476..13520026	11.1407	4.65634	25.2173	1.12705e-07	6.96527e-06	0.00415148	ENSOMYG00000002413	ENSOMYG00000002413	protein_coding
gene:ENSOMYG00000020055	24	complement(19910726..19939209)	24.1511	4.65532	25.1994	1.06455e-27	9.03517e-24	3.92126e-23	ENSOMYG00000020055	ENSOMYG00000020055	protein_coding
serping1_3	19	19745460..19751327	0.942892	4.64649	25.0457	0.000489649	0.00598533	1	ENSOMYG00000011625	ENSOMYG00000011625	protein_coding
slc13a4_2	21	complement(30076500..30090028)	0.494934	4.60096	24.2675	0.00162192	0.0151384	1	ENSOMYG00000045311	ENSOMYG00000045311	protein_coding
gene:ENSOMYG00000003582	12	complement(16325249..16326249)	11.496	4.52065	22.9536	3.91608e-08	2.90703e-06	0.00144249	ENSOMYG00000003582	ENSOMYG00000003582	protein_coding
gene:ENSOMYG00000039547	19	9939642..9950284	0.546734	4.51798	22.9112	0.00495187	0.0351601	1	ENSOMYG00000039547	ENSOMYG00000039547	protein_coding
gene:ENSOMYG00000046283	7	complement(18252413..18253543)	3.81206	4.50623	22.7254	5.47766e-09	5.42693e-07	0.00020177	ENSOMYG00000046283	ENSOMYG00000046283	protein_coding
gene:ENSOMYG00000025584	28	complement(32788274..32811944)	0.226749	4.4876	22.4337	0.000373461	0.00491679	1	ENSOMYG00000025584	ENSOMYG00000025584	protein_coding
apoa-i-1	27	12343805..12346332	16.2903	4.406	21.2001	2.23781e-07	1.25782e-05	0.00824297	ENSOMYG00000046501	ENSOMYG00000046501	protein_coding
gene:ENSOMYG00000051295	12	complement(75698030..75707926)	0.798919	4.40279	21.153	0.00337814	0.0263685	1	ENSOMYG00000051295	ENSOMYG00000051295	protein_coding
gene:ENSOMYG00000011036	2	complement(89752176..89763266)	51.272	4.38422	20.8825	4.98911e-17	9.07376e-14	1.83774e-12	ENSOMYG00000011036	ENSOMYG00000011036	protein_coding
apoa2_2	3	13529662..13533477	8.28198	4.37755	20.7862	2.93235e-06	0.000101999	0.108013	ENSOMYG00000002485	ENSOMYG00000002485	protein_coding
GPR26_3	23	complement(26227031..26230799)	0.714762	4.37089	20.6904	0.00477945	0.0341742	1	ENSOMYG00000035765	ENSOMYG00000035765	protein_coding
slc16a12b_2	20	complement(12695295..12723540)	7.62356	4.36797	20.6486	1.70604e-16	2.89594e-13	6.28418e-12	ENSOMYG00000016431	ENSOMYG00000016431	protein_coding
gene:ENSOMYG00000014413	19	60311484..60323790	0.125412	4.36378	20.5887	0.00651472	0.0428182	1	ENSOMYG00000014413	ENSOMYG00000014413	protein_coding
socs2b	16	complement(49045311..49046808)	2.06954	4.3452	20.3253	0.000131513	0.00216597	1	ENSOMYG00000051998	ENSOMYG00000051998	protein_coding
leg1	4	15248791..15251355	0.810049	4.33309	20.1554	0.00607498	0.0407163	1	ENSOMYG00000016452	ENSOMYG00000016452	protein_coding
PDZD7	16	19150590..19164611	0.530386	4.318	19.9456	0.000152406	0.00241178	1	ENSOMYG00000008358	ENSOMYG00000008358	protein_coding
gene:ENSOMYG00000069103	3	28255252..28256506	4.53951	4.29032	19.5666	0.000161699	0.00253124	1	ENSOMYG00000069103	ENSOMYG00000069103	protein_coding
gene:ENSOMYG00000018942	28	5320566..5369610	0.510273	4.28956	19.5562	0.00199535	0.0176961	1	ENSOMYG00000018942	ENSOMYG00000018942	protein_coding
apoa2_1	2	22353032..22356081	7.43429	4.27961	19.4219	4.92157e-06	0.000157277	0.181286	ENSOMYG00000029517	ENSOMYG00000029517	protein_coding
FBXO30	19	complement(26867656..26870377)	14.2155	4.26286	19.1976	2.81934e-14	1.99405e-11	1.0385e-09	ENSOMYG00000027548	ENSOMYG00000027548	protein_coding
gene:ENSOMYG00000060832	2	complement(11211539..11213623)	2.2617	4.26203	19.1866	1.64763e-06	6.45416e-05	0.0606906	ENSOMYG00000060832	ENSOMYG00000060832	protein_coding
gene:ENSOMYG00000036513	13	complement(66225665..66443347)	5.8168	4.22628	18.717	1.4986e-20	7.63148e-17	5.5201e-16	ENSOMYG00000036513	ENSOMYG00000036513	protein_coding
gene:ENSOMYG00000015210	18	complement(63965115..63966130)	6.12534	4.14115	17.6446	5.9791e-05	0.0011648	1	ENSOMYG00000015210	ENSOMYG00000015210	protein_coding
tmf1_1	7	49537841..49548413	0.33213	4.10397	17.1957	0.00404939	0.0302274	1	ENSOMYG00000003278	ENSOMYG00000003278	protein_coding
gene:ENSOMYG00000020032	24	complement(19894453..19897599)	2.62745	4.10334	17.1882	1.83192e-09	2.15946e-07	6.74789e-05	ENSOMYG00000020032	ENSOMYG00000020032	protein_coding
gene:ENSOMYG00000038010	24	complement(19897432..19901341)	5.98733	4.10047	17.154	1.88534e-11	4.75293e-09	6.94466e-07	ENSOMYG00000038010	ENSOMYG00000038010	protein_coding
f10_2	18	complement(12833783..12837444)	0.561597	4.09893	17.1357	0.00634981	0.042071	1	ENSOMYG00000005561	ENSOMYG00000005561	protein_coding
gene:ENSOMYG00000014638	9	14952333..14971683	0.207716	4.08269	16.9439	0.00365378	0.0279545	1	ENSOMYG00000014638	ENSOMYG00000014638	protein_coding
gene:ENSOMYG00000038021	27	complement(22782161..22807586)	3.91373	4.07221	16.8212	3.86952e-14	2.46314e-11	1.42534e-09	ENSOMYG00000038021	ENSOMYG00000038021	protein_coding
slc25a24l	8	89074851..89094267	0.550747	4.05921	16.6703	0.00643808	0.04249	1	ENSOMYG00000007129	ENSOMYG00000007129	protein_coding
hpxa	3	complement(80646065..80658592)	1.61599	4.05905	16.6685	0.000107279	0.00184065	1	ENSOMYG00000000744	ENSOMYG00000000744	protein_coding
gene:ENSOMYG00000011519	21	19952893..19955947	6.80201	4.04416	16.4973	4.4229e-10	6.74347e-08	1.62918e-05	ENSOMYG00000011519	ENSOMYG00000011519	protein_coding
TEPSIN	23	49967239..49973240	50.4604	4.02782	16.3115	3.0256e-16	4.81486e-13	1.11448e-11	ENSOMYG00000024676	ENSOMYG00000024676	protein_coding
gene:ENSOMYG00000057156	15	complement(56914748..56919934)	0.49244	4.00974	16.1084	1.08578e-05	0.000295997	0.399947	ENSOMYG00000057156	ENSOMYG00000057156	protein_coding
foxp1a_2	16	complement(48348223..48355310)	27.4237	3.96831	15.6523	3.73748e-19	1.35948e-15	1.3767e-14	ENSOMYG00000033705	ENSOMYG00000033705	protein_coding
gene:ENSOMYG00000022386	14	complement(22343070..22391728)	32.7453	3.95104	15.4662	1.53296e-14	1.21976e-11	5.64665e-10	ENSOMYG00000022386	ENSOMYG00000022386	protein_coding
gene:ENSOMYG00000028667	9	complement(68182728..68192472)	0.231344	3.94465	15.3977	0.00584419	0.0396284	1	ENSOMYG00000028667	ENSOMYG00000028667	protein_coding
trim63a	7	complement(10085188..10086981)	1397.64	3.93446	15.2895	2.36074e-12	8.58704e-10	8.6958e-08	ENSOMYG00000075073	ENSOMYG00000075073	protein_coding
gene:ENSOMYG00000005254	10	complement(69241401..69254218)	0.625409	3.91543	15.089	0.005218	0.0365002	1	ENSOMYG00000005254	ENSOMYG00000005254	protein_coding
tmem184c_1	10	complement(67572671..67579914)	6.34511	3.91131	15.046	5.96704e-13	2.71309e-10	2.19796e-08	ENSOMYG00000010954	ENSOMYG00000010954	protein_coding
gene:ENSOMYG00000052710	17	7841388..7860175	0.228845	3.90353	14.9651	0.00421009	0.0309998	1	ENSOMYG00000052710	ENSOMYG00000052710	protein_coding
slc13a4_1	15	51176551..51197985	4.19004	3.89598	14.887	7.58488e-10	1.067e-07	2.79389e-05	ENSOMYG00000041597	ENSOMYG00000041597	protein_coding
glrx3_2	23	complement(9883399..9915155)	0.678544	3.89265	14.8527	0.00294363	0.0237863	1	ENSOMYG00000058551	ENSOMYG00000058551	protein_coding
gene:ENSOMYG00000040218	26	44470781..44472614	0.994714	3.87823	14.7049	5.92252e-05	0.00115555	1	ENSOMYG00000040218	ENSOMYG00000040218	protein_coding
gene:ENSOMYG00000065449	10	complement(69209570..69220296)	1.78935	3.86053	14.5257	0.000193732	0.00292922	1	ENSOMYG00000065449	ENSOMYG00000065449	protein_coding
gene:ENSOMYG00000023875	21	complement(59896374..59905820)	1.01446	3.85362	14.4562	0.000615394	0.00712235	1	ENSOMYG00000023875	ENSOMYG00000023875	protein_coding
rdh3	3	48891589..48898487	0.46177	3.84183	14.3386	0.00791947	0.0493383	1	ENSOMYG00000047765	ENSOMYG00000047765	protein_coding
trpc4a	Y	complement(41192007..41310039)	0.64631	3.8393	14.3135	4.14245e-05	0.000875944	1	ENSOMYG00000063451	ENSOMYG00000063451	protein_coding
prr5a_1	1	complement(36121343..36129547)	3.15068	3.8198	14.1213	6.2955e-13	2.81221e-10	2.31895e-08	ENSOMYG00000026048	ENSOMYG00000026048	protein_coding
gene:ENSOMYG00000039907	5	complement(17163564..17177024)	0.855644	3.81582	14.0824	0.000710809	0.00796594	1	ENSOMYG00000039907	ENSOMYG00000039907	protein_coding
c4b	2	complement(9116570..9141685)	0.163099	3.81299	14.0548	0.0035865	0.0275639	1	ENSOMYG00000055517	ENSOMYG00000055517	protein_coding
gene:ENSOMYG00000011538	18	complement(17576234..17590530)	0.707535	3.81292	14.0541	4.50234e-10	6.78335e-08	1.65844e-05	ENSOMYG00000011538	ENSOMYG00000011538	protein_coding
gene:ENSOMYG00000040440	30	11201882..11226082	8.01851	3.79849	13.9143	1.0972e-05	0.000298471	0.404153	ENSOMYG00000040440	ENSOMYG00000040440	protein_coding
apoa-i-2	24	9468959..9471076	1.00685	3.77128	13.6542	0.00477084	0.0341318	1	ENSOMYG00000031108	ENSOMYG00000031108	protein_coding
ypel3_2	30	44556815..44563310	6.51493	3.76922	13.6347	3.61493e-11	8.14542e-09	1.33156e-06	ENSOMYG00000067517	ENSOMYG00000067517	protein_coding
gene:ENSOMYG00000038933	27	complement(16304211..16305176)	10.6095	3.76336	13.5795	3.03317e-08	2.31229e-06	0.00111727	ENSOMYG00000038933	ENSOMYG00000038933	protein_coding
gene:ENSOMYG00000027996	2	11202947..11210759	36.09	3.75063	13.4602	1.32175e-13	7.47877e-11	4.86868e-09	ENSOMYG00000027996	ENSOMYG00000027996	protein_coding
gene:ENSOMYG00000021738	7	complement(47404922..47415847)	11.0933	3.74609	13.4179	1.42902e-07	8.58151e-06	0.00526378	ENSOMYG00000021738	ENSOMYG00000021738	protein_coding
MTCL3	4	22450640..22456933	13.4242	3.72505	13.2237	6.93224e-19	2.20636e-15	2.55349e-14	ENSOMYG00000018294	ENSOMYG00000018294	protein_coding
socs2	15	55056902..55063742	2.27393	3.72445	13.2182	1.12147e-09	1.42829e-07	4.13095e-05	ENSOMYG00000043353	ENSOMYG00000043353	protein_coding
gene:ENSOMYG00000026374	27	complement(26394205..26437113)	26.2078	3.70773	13.0658	1.73862e-12	6.60728e-10	6.40421e-08	ENSOMYG00000026374	ENSOMYG00000026374	protein_coding
zgc:123105_1	10	49746453..49752285	1.56119	3.65448	12.5923	5.12276e-05	0.00102929	1	ENSOMYG00000047584	ENSOMYG00000047584	protein_coding
APOH_3	17	complement(30927425..30937566)	0.391042	3.65225	12.5729	0.00451399	0.0327357	1	ENSOMYG00000014846	ENSOMYG00000014846	protein_coding
gene:ENSOMYG00000056012	2	55861437..55925750	0.547751	3.62314	12.3218	9.71063e-05	0.00170636	1	ENSOMYG00000056012	ENSOMYG00000056012	protein_coding
gene:ENSOMYG00000059435	7	40374821..40375840	1.39312	3.60273	12.1487	0.000186706	0.00284665	1	ENSOMYG00000059435	ENSOMYG00000059435	protein_coding
gene:ENSOMYG00000042426	18	complement(13085278..13102224)	0.567818	3.59708	12.1012	2.90936e-07	1.57949e-05	0.0107166	ENSOMYG00000042426	ENSOMYG00000042426	protein_coding
mknk2b_1	5	66366235..66380867	101.4	3.59007	12.0426	7.98771e-13	3.44717e-10	2.94227e-08	ENSOMYG00000009233	ENSOMYG00000009233	protein_coding
arl13a	14	8961541..8969575	6.03357	3.5864	12.012	1.51697e-10	2.64556e-08	5.58777e-06	ENSOMYG00000009286	ENSOMYG00000009286	protein_coding
gene:ENSOMYG00000046559	7	complement(20218161..20247178)	1.78973	3.56501	11.8352	1.14861e-08	1.03342e-06	0.00042309	ENSOMYG00000046559	ENSOMYG00000046559	protein_coding
gene:ENSOMYG00000009375	19	complement(42189293..42213271)	0.338195	3.5424	11.6512	0.000493047	0.00601558	1	ENSOMYG00000009375	ENSOMYG00000009375	protein_coding
gene:ENSOMYG00000018344	4	22455247..22462032	213.195	3.51405	11.4244	2.03607e-11	5.0439e-09	7.49985e-07	ENSOMYG00000018344	ENSOMYG00000018344	protein_coding
gene:ENSOMYG00000069386	1	complement(90912043..90913053)	9.6837	3.51066	11.3976	1.86998e-08	1.55288e-06	0.000688807	ENSOMYG00000069386	ENSOMYG00000069386	protein_coding
atg9b	8	71660023..71681196	19.3838	3.51003	11.3926	1.18262e-15	1.34319e-12	4.3562e-11	ENSOMYG00000028292	ENSOMYG00000028292	protein_coding
gene:ENSOMYG00000041648	24	complement(25681402..25699298)	0.28861	3.50491	11.3523	0.0030821	0.0246162	1	ENSOMYG00000041648	ENSOMYG00000041648	protein_coding
slc7a8a_1	9	16777844..16820768	29.6727	3.50274	11.3352	3.79943e-11	8.21162e-09	1.39952e-06	ENSOMYG00000012740	ENSOMYG00000012740	protein_coding
gene:ENSOMYG00000045631	23	complement(47164061..47173639)	1.07549	3.49686	11.2891	0.00253515	0.0212406	1	ENSOMYG00000045631	ENSOMYG00000045631	protein_coding
pcmtd1_2	28	13883820..13907864	10.25	3.4944	11.2699	3.25362e-15	3.18629e-12	1.19847e-10	ENSOMYG00000041965	ENSOMYG00000041965	protein_coding
gene:ENSOMYG00000010630	12	81191070..81193019	2.13332	3.4856	11.2013	0.000517766	0.00623917	1	ENSOMYG00000010630	ENSOMYG00000010630	protein_coding
gene:ENSOMYG00000013853	9	complement(14282573..14284992)	9.08584	3.48393	11.1884	6.05267e-08	4.21074e-06	0.0022295	ENSOMYG00000013853	ENSOMYG00000013853	protein_coding
gene:ENSOMYG00000046327	27	complement(14785177..14820790)	0.170562	3.48002	11.1581	0.00202974	0.0179511	1	ENSOMYG00000046327	ENSOMYG00000046327	protein_coding
gene:ENSOMYG00000046936	17	54792934..54819004	0.263621	3.45279	10.9495	0.00301653	0.0241759	1	ENSOMYG00000046936	ENSOMYG00000046936	protein_coding
ulk1a	11	complement(53177614..53198896)	40.7433	3.43928	10.8474	3.68881e-11	8.17485e-09	1.35877e-06	ENSOMYG00000010754	ENSOMYG00000010754	protein_coding
gene:ENSOMYG00000061778	15	complement(72307442..72310766)	10.8784	3.42349	10.7293	6.86749e-11	1.34508e-08	2.52964e-06	ENSOMYG00000061778	ENSOMYG00000061778	protein_coding
myh7	28	18406395..18419914	10.7154	3.4144	10.6619	0.000338706	0.0045534	1	ENSOMYG00000037684	ENSOMYG00000037684	protein_coding
gene:ENSOMYG00000009931	8	complement(45512463..45522665)	10.7819	3.41199	10.6441	3.66501e-12	1.19639e-09	1.35001e-07	ENSOMYG00000009931	ENSOMYG00000009931	protein_coding
SSX2IP	4	1355222..1371675	2.01004	3.41173	10.6422	4.47164e-07	2.21943e-05	0.0164713	ENSOMYG00000005738	ENSOMYG00000005738	protein_coding
gene:ENSOMYG00000028244	5	16948711..16967798	22.4219	3.40788	10.6139	0.00131318	0.0128069	1	ENSOMYG00000028244	ENSOMYG00000028244	protein_coding
gene:ENSOMYG00000018280	10	61074605..61082239	1.56502	3.39865	10.5462	4.90103e-07	2.38149e-05	0.0180529	ENSOMYG00000018280	ENSOMYG00000018280	protein_coding
gene:ENSOMYG00000005174	6	complement(29863238..29870243)	1.67155	3.37675	10.3873	6.1967e-06	0.000190326	0.228256	ENSOMYG00000005174	ENSOMYG00000005174	protein_coding
fance	9	68212843..68218970	1.81658	3.36622	10.3118	8.8992e-09	8.39228e-07	0.000327802	ENSOMYG00000028766	ENSOMYG00000028766	protein_coding
ambp_1	5	45982919..45989310	1.97006	3.36533	10.3054	0.000751136	0.00830457	1	ENSOMYG00000030902	ENSOMYG00000030902	protein_coding
gene:ENSOMYG00000031366	28	16073878..16129367	11.2102	3.36183	10.2804	3.1344e-18	8.86756e-15	1.15456e-13	ENSOMYG00000031366	ENSOMYG00000031366	protein_coding
gene:ENSOMYG00000046853	17	complement(54764134..54777490)	10.3676	3.35685	10.245	0.00243823	0.0205775	1	ENSOMYG00000046853	ENSOMYG00000046853	protein_coding
gene:ENSOMYG00000068169	16	complement(48075290..48087032)	18.686	3.35601	10.2391	1.16163e-14	9.54112e-12	4.27887e-10	ENSOMYG00000068169	ENSOMYG00000068169	protein_coding
gene:ENSOMYG00000064997	17	1789527..1793102	0.566477	3.34716	10.1764	0.00469875	0.0337013	1	ENSOMYG00000064997	ENSOMYG00000064997	protein_coding
gene:ENSOMYG00000073421	1	complement(48750943..48751953)	1.96978	3.33705	10.1053	0.0013911	0.0134269	1	ENSOMYG00000073421	ENSOMYG00000073421	protein_coding
RNF166_2	26	complement(22458077..22472886)	2.16097	3.31954	9.98344	1.67507e-08	1.41227e-06	0.000617013	ENSOMYG00000054129	ENSOMYG00000054129	protein_coding
stk11ip_2	18	15203225..15250921	7.43315	3.31103	9.92475	1.7802e-17	3.77729e-14	6.55738e-13	ENSOMYG00000005810	ENSOMYG00000005810	protein_coding
gene:ENSOMYG00000003277	13	complement(6968153..6969970)	6.11792	3.31098	9.92439	4.58664e-05	0.00094793	1	ENSOMYG00000003277	ENSOMYG00000003277	protein_coding
gene:ENSOMYG00000000843	3	complement(80980820..80984456)	30.6814	3.29984	9.84808	1.74865e-11	4.54328e-09	6.44116e-07	ENSOMYG00000000843	ENSOMYG00000000843	protein_coding
asb5b_2	19	complement(13815095..13824766)	14.9219	3.298	9.83551	1.21331e-15	1.34319e-12	4.46922e-11	ENSOMYG00000019512	ENSOMYG00000019512	protein_coding
ABHD2_1	2	56146947..56170087	16.6792	3.29669	9.82658	3.52131e-12	1.16441e-09	1.29708e-07	ENSOMYG00000027668	ENSOMYG00000027668	protein_coding
gene:ENSOMYG00000016777	3	complement(30592095..30593887)	1.06839	3.26655	9.62345	0.00027006	0.00380325	1	ENSOMYG00000016777	ENSOMYG00000016777	protein_coding
zgc:162331_2	21	30099839..30112348	0.840543	3.2551	9.54734	0.000162838	0.00254523	1	ENSOMYG00000062020	ENSOMYG00000062020	protein_coding
cfbl	Y	34145173..34154958	0.429164	3.25187	9.526	0.00541918	0.0374701	1	ENSOMYG00000029511	ENSOMYG00000029511	protein_coding
AMPD3_2	26	25662024..25675679	28.4612	3.2504	9.51629	2.72833e-08	2.13095e-06	0.00100498	ENSOMYG00000024165	ENSOMYG00000024165	protein_coding
HOXC11_2	17	complement(58469424..58472866)	1.57157	3.24862	9.50455	0.00508378	0.0358009	1	ENSOMYG00000034848	ENSOMYG00000034848	protein_coding
rab5ab_2	3	25578314..25583694	38.8098	3.23143	9.392	1.77574e-13	9.41959e-11	6.54096e-09	ENSOMYG00000007020	ENSOMYG00000007020	protein_coding
gene:ENSOMYG00000012858	13	64506432..64744207	1.13122	3.22905	9.37651	5.39069e-12	1.65371e-09	1.98566e-07	ENSOMYG00000012858	ENSOMYG00000012858	protein_coding
gene:ENSOMYG00000032437	12	68377487..68393700	3.35799	3.2144	9.28178	3.83766e-11	8.21162e-09	1.4136e-06	ENSOMYG00000032437	ENSOMYG00000032437	protein_coding
eif4ebp3	10	complement(9217460..9222244)	53.6182	3.21411	9.27989	3.57979e-14	2.33714e-11	1.31862e-09	ENSOMYG00000047289	ENSOMYG00000047289	protein_coding
gene:ENSOMYG00000020103	6	68612279..68623638	77.0778	3.21365	9.27694	8.27826e-12	2.39524e-09	3.0493e-07	ENSOMYG00000020103	ENSOMYG00000020103	protein_coding
gene:ENSOMYG00000040630	24	complement(23839721..23901978)	22.4201	3.20598	9.22776	2.08917e-13	1.04303e-10	7.69547e-09	ENSOMYG00000040630	ENSOMYG00000040630	protein_coding
gene:ENSOMYG00000049210	3	15798090..15801153	3.91758	3.19976	9.18804	9.43174e-12	2.69833e-09	3.47418e-07	ENSOMYG00000049210	ENSOMYG00000049210	protein_coding
RADX	10	complement(39010418..39015615)	1.43048	3.19297	9.14494	3.83101e-06	0.000126847	0.141115	ENSOMYG00000021904	ENSOMYG00000021904	protein_coding
gene:ENSOMYG00000001488	9	45542321..45546035	0.70594	3.19208	9.13926	0.00513485	0.0360473	1	ENSOMYG00000001488	ENSOMYG00000001488	protein_coding
gene:ENSOMYG00000019167	9	complement(42599763..42612262)	8.83081	3.18625	9.10241	2.08588e-11	5.1068e-09	7.68335e-07	ENSOMYG00000019167	ENSOMYG00000019167	protein_coding
PITPNM2	12	complement(16944326..17041829)	0.464531	3.18178	9.07424	2.69309e-06	9.5238e-05	0.0991999	ENSOMYG00000007835	ENSOMYG00000007835	protein_coding
si:dkey-103i16.6	2	82997062..83002635	1.78334	3.18099	9.06927	3.17906e-05	0.000708183	1	ENSOMYG00000027553	ENSOMYG00000027553	protein_coding
vps37a_1	10	72633002..72648178	15.9478	3.17638	9.04034	3.10395e-14	2.13602e-11	1.14334e-09	ENSOMYG00000058646	ENSOMYG00000058646	protein_coding
zgc:162331_1	15	complement(51152461..51179924)	0.242517	3.16963	8.99813	0.00738006	0.0469543	1	ENSOMYG00000041576	ENSOMYG00000041576	protein_coding
mxra8b_1	9	complement(58094262..58111538)	3.89706	3.16121	8.94578	5.42805e-08	3.89321e-06	0.00199942	ENSOMYG00000046198	ENSOMYG00000046198	protein_coding
upf3b_2	31	41227774..41231288	23.3236	3.15836	8.92816	7.98052e-16	9.67619e-13	2.93962e-11	ENSOMYG00000046629	ENSOMYG00000046629	protein_coding
gene:ENSOMYG00000030527	25	40439996..40454140	14.8673	3.14686	8.85724	5.26976e-11	1.05652e-08	1.94112e-06	ENSOMYG00000030527	ENSOMYG00000030527	protein_coding
gene:ENSOMYG00000017733	1	complement(48440246..48462078)	55.1362	3.14679	8.85682	9.20272e-10	1.24171e-07	3.38982e-05	ENSOMYG00000017733	ENSOMYG00000017733	protein_coding
gene:ENSOMYG00000049099	16	53256452..53263629	6.14338	3.14258	8.83101	1.58999e-13	8.61984e-11	5.85672e-09	ENSOMYG00000049099	ENSOMYG00000049099	protein_coding
igf2r_2	8	complement(21833113..21872507)	11.627	3.13777	8.8016	1.73692e-12	6.60728e-10	6.39794e-08	ENSOMYG00000047099	ENSOMYG00000047099	protein_coding
gene:ENSOMYG00000019110	1	complement(60526780..60538759)	0.435075	3.12713	8.73693	0.0080172	0.0496955	1	ENSOMYG00000019110	ENSOMYG00000019110	protein_coding
hbegf	10	9300498..9303144	7.88556	3.12586	8.72929	9.03694e-10	1.23047e-07	3.32876e-05	ENSOMYG00000050156	ENSOMYG00000050156	protein_coding
gene:ENSOMYG00000062739	32	complement(11751715..11755548)	0.25542	3.10979	8.63255	0.00399071	0.0298681	1	ENSOMYG00000062739	ENSOMYG00000062739	protein_coding
gbp	3	complement(22090738..22091223)	25.4538	3.10203	8.58626	3.24855e-11	7.5195e-09	1.1966e-06	ENSOMYG00000003044	ENSOMYG00000003044	protein_coding
sqstm1_2	31	36114479..36120648	233.185	3.09662	8.55413	1.1233e-11	3.14303e-09	4.13769e-07	ENSOMYG00000044911	ENSOMYG00000044911	protein_coding
rab33ba_1	14	complement(11390056..11393043)	21	3.09304	8.53294	5.17384e-13	2.39521e-10	1.90578e-08	ENSOMYG00000060707	ENSOMYG00000060707	protein_coding
gene:ENSOMYG00000061699	11	complement(83871229..83873403)	1.12177	3.08578	8.49011	2.47486e-05	0.000579713	0.911614	ENSOMYG00000061699	ENSOMYG00000061699	protein_coding
gene:ENSOMYG00000007705	18	complement(11782358..11790753)	94.7114	3.0836	8.47729	1.41433e-09	1.74814e-07	5.20969e-05	ENSOMYG00000007705	ENSOMYG00000007705	protein_coding
gene:ENSOMYG00000033738	16	complement(48373364..48383705)	13.2916	3.07914	8.45113	1.66498e-14	1.28466e-11	6.13296e-10	ENSOMYG00000033738	ENSOMYG00000033738	protein_coding
vps37a_2	19	complement(3622944..3639977)	19.5709	3.07768	8.44254	1.66999e-11	4.42929e-09	6.15139e-07	ENSOMYG00000009760	ENSOMYG00000009760	protein_coding
gene:ENSOMYG00000034649	27	45479798..45491134	11.112	3.07696	8.43836	4.43487e-14	2.75416e-11	1.63358e-09	ENSOMYG00000034649	ENSOMYG00000034649	protein_coding
gene:ENSOMYG00000019052	12	complement(61867885..61869532)	10.5384	3.06552	8.37169	5.02323e-07	2.43622e-05	0.0185031	ENSOMYG00000019052	ENSOMYG00000019052	protein_coding
gene:ENSOMYG00000017583	7	complement(28852618..28860592)	0.55866	3.06064	8.34342	0.00289032	0.0234747	1	ENSOMYG00000017583	ENSOMYG00000017583	protein_coding
gene:ENSOMYG00000065217	31	12160227..12170982	0.435934	3.05791	8.32766	0.00194852	0.0173534	1	ENSOMYG00000065217	ENSOMYG00000065217	protein_coding
gene:ENSOMYG00000000143	1	8182348..8184025	3.12937	3.05675	8.32096	0.000931667	0.00990484	1	ENSOMYG00000000143	ENSOMYG00000000143	protein_coding
gene:ENSOMYG00000015846	7	74920631..74923103	1.46175	3.05291	8.29882	0.00260882	0.0216936	1	ENSOMYG00000015846	ENSOMYG00000015846	protein_coding
gene:ENSOMYG00000038841	12	complement(89389867..89393863)	1.77423	3.04392	8.24732	0.000129746	0.00214519	1	ENSOMYG00000038841	ENSOMYG00000038841	protein_coding
gene:ENSOMYG00000041584	28	30721426..30751089	11.8775	3.0324	8.18171	2.24523e-14	1.63337e-11	8.27029e-10	ENSOMYG00000041584	ENSOMYG00000041584	protein_coding
gene:ENSOMYG00000038040	2	complement(37777045..37823469)	0.54185	3.0283	8.1585	0.000122157	0.00204583	1	ENSOMYG00000038040	ENSOMYG00000038040	protein_coding
HOXC11_1	7	63569647..63573052	0.951925	3.027	8.15111	0.00135525	0.0131307	1	ENSOMYG00000047253	ENSOMYG00000047253	protein_coding
slc7a8a_2	21	43002419..43034232	25.5987	3.02509	8.14033	6.44758e-13	2.83049e-10	2.37497e-08	ENSOMYG00000035105	ENSOMYG00000035105	protein_coding
gene:ENSOMYG00000005142	6	29856805..29863544	3.597	3.02492	8.13937	5.4195e-11	1.07806e-08	1.99627e-06	ENSOMYG00000005142	ENSOMYG00000005142	protein_coding
gene:ENSOMYG00000010997	17	62472149..62489759	7.01643	3.02293	8.12815	1.31162e-12	5.21822e-10	4.83137e-08	ENSOMYG00000010997	ENSOMYG00000010997	protein_coding
gene:ENSOMYG00000072188	12	complement(102081744..102087540)	1.37585	3.01029	8.05729	7.59774e-06	0.000221596	0.279863	ENSOMYG00000072188	ENSOMYG00000072188	protein_coding
gene:ENSOMYG00000034600	23	complement(56762059..56779164)	2.27315	3.00956	8.05321	0.000307191	0.00422566	1	ENSOMYG00000034600	ENSOMYG00000034600	protein_coding
gene:ENSOMYG00000059213	11	complement(47485844..47499444)	24.4092	2.99674	7.98197	2.85527e-12	9.95904e-10	1.05174e-07	ENSOMYG00000059213	ENSOMYG00000059213	protein_coding
gene:ENSOMYG00000005636	10	68450344..68458169	14.4451	2.99483	7.97136	1.56752e-11	4.20128e-09	5.77396e-07	ENSOMYG00000005636	ENSOMYG00000005636	protein_coding
SOCS2a2	21	complement(26419068..26426307)	1.82575	2.98629	7.92432	4.94425e-05	0.00100152	1	ENSOMYG00000058535	ENSOMYG00000058535	protein_coding
gene:ENSOMYG00000014690	17	30499042..30528975	0.761189	2.98448	7.9144	0.000114236	0.00193914	1	ENSOMYG00000014690	ENSOMYG00000014690	protein_coding
znrf2a_2	32	complement(10524786..10527341)	13.9819	2.97753	7.87636	5.25987e-11	1.05652e-08	1.93747e-06	ENSOMYG00000049311	ENSOMYG00000049311	protein_coding
OSBPL1A_1	5	66677289..66702895	12.672	2.97444	7.85952	6.68437e-16	8.95776e-13	2.46219e-11	ENSOMYG00000012354	ENSOMYG00000012354	protein_coding
gene:ENSOMYG00000034291	18	complement(27974815..27982326)	19.9018	2.96671	7.81749	3.25159e-14	2.17874e-11	1.19772e-09	ENSOMYG00000034291	ENSOMYG00000034291	protein_coding
gene:ENSOMYG00000000741	1	complement(90737459..90741170)	2.96941	2.96565	7.81176	0.00128625	0.0126206	1	ENSOMYG00000000741	ENSOMYG00000000741	protein_coding
gene:ENSOMYG00000004468	7	complement(65469399..65476411)	9.70467	2.96011	7.78186	2.39868e-08	1.90265e-06	0.000883554	ENSOMYG00000004468	ENSOMYG00000004468	protein_coding
pla2g6_2	17	complement(16374342..16399559)	13.1766	2.95957	7.77891	4.06715e-10	6.24562e-08	1.49813e-05	ENSOMYG00000071749	ENSOMYG00000071749	protein_coding
KPNA3_1	3	71947503..71972463	6.01017	2.95174	7.73683	9.03928e-11	1.7176e-08	3.32962e-06	ENSOMYG00000002744	ENSOMYG00000002744	protein_coding
gene:ENSOMYG00000017060	1	complement(22111911..22203192)	2.37407	2.95054	7.7304	1.7397e-06	6.71155e-05	0.0640819	ENSOMYG00000017060	ENSOMYG00000017060	protein_coding
gene:ENSOMYG00000003996	32	8410279..8420723	1.59142	2.94932	7.72387	4.31253e-08	3.19098e-06	0.00158852	ENSOMYG00000003996	ENSOMYG00000003996	protein_coding
ATP11A_1	3	complement(72123643..72206377)	0.315811	2.93749	7.66077	0.00197491	0.0175455	1	ENSOMYG00000003084	ENSOMYG00000003084	protein_coding
tmg2	30	complement(45009471..45017839)	2.56369	2.93677	7.65697	7.19488e-07	3.27721e-05	0.0265023	ENSOMYG00000046212	ENSOMYG00000046212	protein_coding
gene:ENSOMYG00000014045	7	20633644..20657001	1.19541	2.92395	7.58923	2.83825e-05	0.000649026	1	ENSOMYG00000014045	ENSOMYG00000014045	protein_coding
mcrip2_1	13	complement(11707019..11711814)	33.8295	2.92217	7.57987	3.38027e-06	0.000114149	0.124512	ENSOMYG00000040344	ENSOMYG00000040344	protein_coding
gene:ENSOMYG00000027139	2	100949264..101090268	0.0398742	2.9175	7.55537	0.00581553	0.0394866	1	ENSOMYG00000027139	ENSOMYG00000027139	protein_coding
tspan7b	18	13102543..13132209	0.529133	2.91141	7.52351	0.00384733	0.0290426	1	ENSOMYG00000042390	ENSOMYG00000042390	protein_coding
gene:ENSOMYG00000046967	26	28676759..28689308	21.1708	2.90857	7.50876	3.77371e-13	1.84781e-10	1.39005e-08	ENSOMYG00000046967	ENSOMYG00000046967	protein_coding
asip2b_1	8	51876357..51895395	0.293503	2.90826	7.50714	0.00321078	0.025386	1	ENSOMYG00000056285	ENSOMYG00000056285	protein_coding
cant1a_2	13	62374738..62381774	0.471858	2.90622	7.49653	0.000412122	0.00529704	1	ENSOMYG00000016095	ENSOMYG00000016095	protein_coding
RPS6KL1_2	25	19908536..19916627	7.19752	2.90501	7.49021	2.78023e-10	4.55255e-08	1.0241e-05	ENSOMYG00000035555	ENSOMYG00000035555	protein_coding
gene:ENSOMYG00000028937	10	43962170..43978109	3.70418	2.90229	7.4761	9.26374e-09	8.67182e-07	0.00034123	ENSOMYG00000028937	ENSOMYG00000028937	protein_coding
gene:ENSOMYG00000005358	13	8275849..8424128	4.80781	2.90213	7.47528	4.62563e-13	2.22222e-10	1.70385e-08	ENSOMYG00000005358	ENSOMYG00000005358	protein_coding
gene:ENSOMYG00000077184	12	67015452..67025015	0.765963	2.89772	7.45248	0.00161607	0.0151058	1	ENSOMYG00000077184	ENSOMYG00000077184	protein_coding
sema3d_2	2	74660302..74732633	0.40548	2.89588	7.443	0.000917065	0.00978228	1	ENSOMYG00000020518	ENSOMYG00000020518	protein_coding
pla2g15_1	1	24085085..24090734	22.0612	2.89476	7.43718	1.06897e-11	3.02423e-09	3.93755e-07	ENSOMYG00000025766	ENSOMYG00000025766	protein_coding
dedd1_2	3	12092665..12097006	1.69139	2.89232	7.42465	0.000203522	0.00304821	1	ENSOMYG00000000169	ENSOMYG00000000169	protein_coding
gene:ENSOMYG00000024855	21	complement(62649761..62674227)	17.1697	2.87507	7.33638	5.03824e-12	1.56444e-09	1.85584e-07	ENSOMYG00000024855	ENSOMYG00000024855	protein_coding
gene:ENSOMYG00000075638	7	6891079..6899560	87.5575	2.86628	7.29185	3.55107e-09	3.84437e-07	0.000130804	ENSOMYG00000075638	ENSOMYG00000075638	protein_coding
pi4k2a_2	17	13880852..13897290	5.80706	2.86215	7.27097	1.38535e-06	5.66191e-05	0.0510292	ENSOMYG00000005311	ENSOMYG00000005311	protein_coding
MYRFL_2	21	1607655..1669231	0.665143	2.86118	7.26609	0.000203726	0.00304821	1	ENSOMYG00000069810	ENSOMYG00000069810	protein_coding
gene:ENSOMYG00000074157	6	7715523..7717220	0.744133	2.85081	7.21404	0.0024938	0.0209769	1	ENSOMYG00000074157	ENSOMYG00000074157	protein_coding
gene:ENSOMYG00000003221	1	complement(46817796..46837902)	73.7198	2.84818	7.2009	2.67678e-08	2.09711e-06	0.000985992	ENSOMYG00000003221	ENSOMYG00000003221	protein_coding
dhrs13a.1	12	complement(24734911..24737099)	1.07139	2.84537	7.18688	0.00120001	0.0120253	1	ENSOMYG00000042231	ENSOMYG00000042231	protein_coding
gene:ENSOMYG00000005445	19	63506315..63534705	0.422799	2.84394	7.17977	0.00212519	0.0185504	1	ENSOMYG00000005445	ENSOMYG00000005445	protein_coding
gene:ENSOMYG00000009398	14	26931774..26960146	24.9403	2.83936	7.15705	3.2956e-11	7.55969e-09	1.21393e-06	ENSOMYG00000009398	ENSOMYG00000009398	protein_coding
atg14_1	19	32000119..32004308	5.40096	2.82755	7.09868	1.10927e-08	1.00513e-06	0.000408599	ENSOMYG00000036458	ENSOMYG00000036458	protein_coding
znf395b_2	8	complement(5537427..5550112)	27.751	2.82465	7.08442	1.93679e-13	1.00642e-10	7.13416e-09	ENSOMYG00000002692	ENSOMYG00000002692	protein_coding
gene:ENSOMYG00000017659	8	complement(77354580..77356022)	1.8716	2.82255	7.07412	0.000664886	0.00755436	1	ENSOMYG00000017659	ENSOMYG00000017659	protein_coding
AMPD3_1	6	65777926..65791875	28.8889	2.82019	7.06255	4.34913e-11	9.22814e-09	1.602e-06	ENSOMYG00000043196	ENSOMYG00000043196	protein_coding
gene:ENSOMYG00000040278	23	complement(23214448..23218993)	0.588634	2.8173	7.04844	0.000973678	0.0102828	1	ENSOMYG00000040278	ENSOMYG00000040278	protein_coding
gene:ENSOMYG00000074111	13	38399951..38401672	2.22964	2.81675	7.04576	0.0052327	0.0365629	1	ENSOMYG00000074111	ENSOMYG00000074111	protein_coding
cp	5	complement(93001469..93041639)	0.297885	2.81243	7.02467	0.00564439	0.0386614	1	ENSOMYG00000011255	ENSOMYG00000011255	protein_coding
gene:ENSOMYG00000050056	15	complement(56909967..56914196)	0.473233	2.80876	7.00681	0.000147942	0.00236465	1	ENSOMYG00000050056	ENSOMYG00000050056	protein_coding
gene:ENSOMYG00000038900	10	complement(69222693..69284043)	1.22822	2.80492	6.98817	0.00285861	0.0232618	1	ENSOMYG00000038900	ENSOMYG00000038900	protein_coding
trib3	17	56448424..56450590	21.7218	2.80187	6.97343	2.85005e-12	9.95904e-10	1.04982e-07	ENSOMYG00000008702	ENSOMYG00000008702	protein_coding
gene:ENSOMYG00000021311	6	86350580..86353339	0.805874	2.79987	6.96379	0.000768581	0.00846436	1	ENSOMYG00000021311	ENSOMYG00000021311	protein_coding
gene:ENSOMYG00000027188	7	complement(60330671..60335708)	0.871205	2.79756	6.95265	0.000150496	0.00239196	1	ENSOMYG00000027188	ENSOMYG00000027188	protein_coding
tpra1_1	7	complement(74760149..74769267)	0.697143	2.7938	6.93455	0.0022412	0.0193049	1	ENSOMYG00000015765	ENSOMYG00000015765	protein_coding
gene:ENSOMYG00000043480	13	25441500..25454083	2.90629	2.79372	6.93417	1.09052e-08	9.91671e-07	0.000401692	ENSOMYG00000043480	ENSOMYG00000043480	protein_coding
ccn2b_2	32	9011739..9019479	67.7093	2.78849	6.90908	9.60204e-10	1.27337e-07	3.53691e-05	ENSOMYG00000071790	ENSOMYG00000071790	protein_coding
gene:ENSOMYG00000064932	16	complement(40120382..40130932)	18.9862	2.78522	6.89344	1.26216e-13	7.30386e-11	4.64915e-09	ENSOMYG00000064932	ENSOMYG00000064932	protein_coding
gene:ENSOMYG00000022565	21	11432232..11466595	1.37417	2.78084	6.87254	8.99577e-08	5.79874e-06	0.00331359	ENSOMYG00000022565	ENSOMYG00000022565	protein_coding
gene:ENSOMYG00000029376	13	complement(66692793..66702920)	1.94125	2.76986	6.82043	0.00123194	0.0122335	1	ENSOMYG00000029376	ENSOMYG00000029376	protein_coding
gene:ENSOMYG00000050103	10	complement(62848091..63013722)	1.78228	2.76708	6.80729	1.03581e-07	6.54436e-06	0.0038154	ENSOMYG00000050103	ENSOMYG00000050103	protein_coding
gene:ENSOMYG00000021901	17	32283332..32310562	5.40684	2.76311	6.7886	4.50103e-10	6.78335e-08	1.65796e-05	ENSOMYG00000021901	ENSOMYG00000021901	protein_coding
gene:ENSOMYG00000062128	Y	complement(37754819..37787666)	9.8379	2.75956	6.77191	8.22981e-13	3.49246e-10	3.03145e-08	ENSOMYG00000062128	ENSOMYG00000062128	protein_coding
ACAN	26	complement(41830993..41862945)	0.186674	2.75283	6.74037	0.00562806	0.0385987	1	ENSOMYG00000050552	ENSOMYG00000050552	protein_coding
gene:ENSOMYG00000000109	5	complement(21958827..21959836)	1.77627	2.7486	6.72065	0.0054065	0.0374327	1	ENSOMYG00000000109	ENSOMYG00000000109	protein_coding
gene:ENSOMYG00000010670	10	complement(59411844..59421179)	8.59768	2.74847	6.72005	1.86528e-11	4.75293e-09	6.87076e-07	ENSOMYG00000010670	ENSOMYG00000010670	protein_coding
CEP85L_2	8	21154587..21227625	8.72748	2.74574	6.70735	2.70993e-11	6.33031e-09	9.98204e-07	ENSOMYG00000046460	ENSOMYG00000046460	protein_coding
gene:ENSOMYG00000008350	19	complement(1886654..1913449)	63.5449	2.74392	6.69889	1.36601e-10	2.41537e-08	5.0317e-06	ENSOMYG00000008350	ENSOMYG00000008350	protein_coding
gene:ENSOMYG00000049515	9	complement(18258394..18260364)	1.54899	2.73356	6.65096	0.00103965	0.0107959	1	ENSOMYG00000049515	ENSOMYG00000049515	protein_coding
polr2m_1	6	complement(68235026..68236930)	30.6485	2.72896	6.62977	1.14364e-08	1.0326e-06	0.000421261	ENSOMYG00000019474	ENSOMYG00000019474	protein_coding
ppm1db	10	complement(40843257..40852543)	5.50211	2.72768	6.62388	1.23723e-10	2.25017e-08	4.55734e-06	ENSOMYG00000036046	ENSOMYG00000036046	protein_coding
UNC79_1	19	41087386..41136933	0.309893	2.72088	6.59276	2.3211e-05	0.000548236	0.854977	ENSOMYG00000041888	ENSOMYG00000041888	protein_coding
smpd1	Y	complement(45668758..45689863)	6.2749	2.714	6.56141	2.54083e-09	2.88815e-07	9.35915e-05	ENSOMYG00000022119	ENSOMYG00000022119	protein_coding
gene:ENSOMYG00000034687	10	19632027..19670425	0.200286	2.71154	6.5502	0.000695675	0.00783326	1	ENSOMYG00000034687	ENSOMYG00000034687	protein_coding
kmo_2	23	complement(13674853..13709893)	0.790877	2.71104	6.54793	0.000896181	0.00959974	1	ENSOMYG00000045143	ENSOMYG00000045143	protein_coding
gene:ENSOMYG00000003425	14	complement(27640920..27643298)	1.33689	2.71041	6.54507	0.000619463	0.00715642	1	ENSOMYG00000003425	ENSOMYG00000003425	protein_coding
gene:ENSOMYG00000029192	6	complement(63032930..63089744)	2.32798	2.70973	6.54199	0.000110105	0.00188027	1	ENSOMYG00000029192	ENSOMYG00000029192	protein_coding
gene:ENSOMYG00000037431	25	36094531..36097660	0.74026	2.70725	6.53074	0.00737898	0.0469543	1	ENSOMYG00000037431	ENSOMYG00000037431	protein_coding
gene:ENSOMYG00000043052	20	complement(32678059..32688294)	5.99884	2.70384	6.51532	7.51616e-09	7.1946e-07	0.000276858	ENSOMYG00000043052	ENSOMYG00000043052	protein_coding
tpd52l1_2	8	complement(20060808..20084445)	16.4802	2.69949	6.49573	4.52831e-09	4.55731e-07	0.0001668	ENSOMYG00000045982	ENSOMYG00000045982	protein_coding
nhsl3	32	6112852..6202903	0.269527	2.6982	6.48993	0.00151999	0.0144034	1	ENSOMYG00000053198	ENSOMYG00000053198	protein_coding
ano10b_3	2	65975555..66032071	0.360994	2.69811	6.48951	0.00581322	0.0394815	1	ENSOMYG00000007607	ENSOMYG00000007607	protein_coding
MAU2_2	5	61786652..61792750	34.1286	2.69713	6.48511	3.52767e-10	5.61384e-08	1.29942e-05	ENSOMYG00000015844	ENSOMYG00000015844	protein_coding
ZFYVE1_2	19	43685426..43693863	10.1401	2.69562	6.47831	2.83411e-12	9.95904e-10	1.04395e-07	ENSOMYG00000014907	ENSOMYG00000014907	protein_coding
slc38a9	5	10341308..10365138	5.20541	2.68703	6.43984	9.18238e-11	1.73186e-08	3.38233e-06	ENSOMYG00000037079	ENSOMYG00000037079	protein_coding
phaf1_1	1	complement(27568782..27574253)	5.40853	2.67903	6.40424	7.09263e-09	6.84062e-07	0.000261257	ENSOMYG00000013892	ENSOMYG00000013892	protein_coding
gene:ENSOMYG00000076609	6	complement(86949247..86965678)	0.604273	2.67876	6.40305	0.00306444	0.0245136	1	ENSOMYG00000076609	ENSOMYG00000076609	protein_coding
gene:ENSOMYG00000021557	24	16074179..16092691	9.41446	2.67856	6.40215	1.84763e-12	6.91829e-10	6.80575e-08	ENSOMYG00000021557	ENSOMYG00000021557	protein_coding
gene:ENSOMYG00000015801	5	complement(61764413..61786689)	17.1156	2.67689	6.39474	1.31297e-11	3.55647e-09	4.83632e-07	ENSOMYG00000015801	ENSOMYG00000015801	protein_coding
gene:ENSOMYG00000014942	2	complement(67491441..67523296)	2.7786	2.67474	6.38524	2.35194e-07	1.31615e-05	0.00866336	ENSOMYG00000014942	ENSOMYG00000014942	protein_coding
gene:ENSOMYG00000036082	10	complement(48071786..48074189)	36.415	2.67422	6.38291	1.03032e-10	1.92896e-08	3.79517e-06	ENSOMYG00000036082	ENSOMYG00000036082	protein_coding
gm2a	14	complement(34915166..34920716)	24.3888	2.67401	6.38199	2.57101e-09	2.90947e-07	9.47031e-05	ENSOMYG00000037055	ENSOMYG00000037055	protein_coding
comtb_1	7	complement(47337414..47344676)	8.17168	2.67288	6.37699	1.06481e-07	6.6289e-06	0.00392223	ENSOMYG00000021507	ENSOMYG00000021507	protein_coding
gene:ENSOMYG00000004485	6	20850296..20865739	9.90822	2.67107	6.36901	9.40926e-08	6.03472e-06	0.0034659	ENSOMYG00000004485	ENSOMYG00000004485	protein_coding
gene:ENSOMYG00000038978	19	9920809..9963011	1.79222	2.66894	6.35963	0.000505387	0.0061277	1	ENSOMYG00000038978	ENSOMYG00000038978	protein_coding
gene:ENSOMYG00000076070	17	complement(20546307..20549698)	4.44489	2.66789	6.35498	7.32763e-08	4.87144e-06	0.00269913	ENSOMYG00000076070	ENSOMYG00000076070	protein_coding
dnajb5_1	6	complement(32020838..32033423)	37.6061	2.66686	6.35044	2.117e-10	3.61765e-08	7.79796e-06	ENSOMYG00000073602	ENSOMYG00000073602	protein_coding
gene:ENSOMYG00000002494	3	complement(36731840..36747907)	5.85137	2.66498	6.3422	3.24323e-10	5.22652e-08	1.19464e-05	ENSOMYG00000002494	ENSOMYG00000002494	protein_coding
KIF21A_3	21	32807612..32833715	0.752198	2.65854	6.31396	1.28257e-05	0.000339466	0.472433	ENSOMYG00000018215	ENSOMYG00000018215	protein_coding
nup98_1	10	34091391..34120843	16.2087	2.65797	6.31145	6.31559e-10	9.18901e-08	2.32635e-05	ENSOMYG00000027349	ENSOMYG00000027349	protein_coding
eif2ak1	20	23376771..23395691	9.57455	2.64812	6.26848	1.02903e-06	4.42811e-05	0.0379042	ENSOMYG00000036014	ENSOMYG00000036014	protein_coding
bnip3_2	1	91076982..91085096	76.0846	2.64811	6.26845	3.25531e-07	1.72681e-05	0.0119909	ENSOMYG00000000538	ENSOMYG00000000538	protein_coding
GPATCH2L	25	complement(20105311..20141226)	4.20358	2.64704	6.2638	4.92522e-08	3.56267e-06	0.0018142	ENSOMYG00000035677	ENSOMYG00000035677	protein_coding
gene:ENSOMYG00000075428	3	complement(5352959..5355355)	1.3325	2.64642	6.26113	0.00535293	0.037138	1	ENSOMYG00000075428	ENSOMYG00000075428	protein_coding
gene:ENSOMYG00000024615	12	94292087..94492613	2.36306	2.64602	6.25937	1.09151e-09	1.41674e-07	4.02056e-05	ENSOMYG00000024615	ENSOMYG00000024615	protein_coding
SEZ6L	5	complement(21183710..21271839)	1.95631	2.64295	6.24608	2.30469e-07	1.29255e-05	0.00848931	ENSOMYG00000002949	ENSOMYG00000002949	protein_coding
si:dkey-3h3.3	11	82151294..82156357	1.07838	2.64022	6.23428	0.00205778	0.0181361	1	ENSOMYG00000033909	ENSOMYG00000033909	protein_coding
gene:ENSOMYG00000037672	25	20523400..20541804	9.80802	2.63782	6.2239	1.2195e-10	2.23388e-08	4.49204e-06	ENSOMYG00000037672	ENSOMYG00000037672	protein_coding
gene:ENSOMYG00000041474	8	47440252..47450150	2.4229	2.63344	6.20502	9.22902e-07	4.06556e-05	0.0339951	ENSOMYG00000041474	ENSOMYG00000041474	protein_coding
gene:ENSOMYG00000072050	13	complement(3522679..3575706)	0.66032	2.63042	6.19207	0.00624291	0.041514	1	ENSOMYG00000072050	ENSOMYG00000072050	protein_coding
nit1	9	15607889..15612914	4.95596	2.62579	6.17221	1.17519e-12	4.74962e-10	4.3288e-08	ENSOMYG00000015195	ENSOMYG00000015195	protein_coding
TOLLIP_1	6	71681761..71690357	5.46356	2.62169	6.1547	5.30269e-07	2.56686e-05	0.0195325	ENSOMYG00000015845	ENSOMYG00000015845	protein_coding
st7l_2	17	complement(81344472..81374646)	5.47094	2.61611	6.13097	3.84221e-10	6.00187e-08	1.41528e-05	ENSOMYG00000023904	ENSOMYG00000023904	protein_coding
gene:ENSOMYG00000076260	13	complement(67686030..67843038)	1.33651	2.61583	6.12974	3.0026e-05	0.000678971	1	ENSOMYG00000076260	ENSOMYG00000076260	protein_coding
atg4b	5	95894951..95913845	258.055	2.61275	6.1167	6.19327e-06	0.000190326	0.228129	ENSOMYG00000006615	ENSOMYG00000006615	protein_coding
dis3l_2	26	complement(6392216..6444686)	5.63325	2.61256	6.11586	4.8502e-11	9.87967e-09	1.78657e-06	ENSOMYG00000048031	ENSOMYG00000048031	protein_coding
gfap_2	13	complement(49448232..49467422)	0.402125	2.60853	6.09883	0.00228144	0.019599	1	ENSOMYG00000004442	ENSOMYG00000004442	protein_coding
gene:ENSOMYG00000014685	12	47952787..47965129	2.72054	2.6052	6.08476	0.000293291	0.00406868	1	ENSOMYG00000014685	ENSOMYG00000014685	protein_coding
CDK19_2	8	18716190..18783368	0.995749	2.60068	6.06573	0.000343401	0.00459951	1	ENSOMYG00000043861	ENSOMYG00000043861	protein_coding
gene:ENSOMYG00000038396	2	57574123..57579396	9.23594	2.59928	6.05985	3.80667e-10	5.98306e-08	1.40219e-05	ENSOMYG00000038396	ENSOMYG00000038396	protein_coding
ahr1b_1	7	complement(22832461..22907538)	0.86715	2.59877	6.0577	8.19158e-05	0.0014824	1	ENSOMYG00000042466	ENSOMYG00000042466	protein_coding
il34_2	2	complement(68981537..68995045)	7.95904	2.59794	6.0542	1.25885e-08	1.12467e-06	0.000463699	ENSOMYG00000019582	ENSOMYG00000019582	protein_coding
gene:ENSOMYG00000048008	13	complement(64653740..64655278)	0.969204	2.59676	6.04926	0.00209102	0.0183655	1	ENSOMYG00000048008	ENSOMYG00000048008	protein_coding
ghr	Y	19227275..19249898	28.9323	2.595	6.04189	5.57724e-11	1.10083e-08	2.05438e-06	ENSOMYG00000047593	ENSOMYG00000047593	protein_coding
gene:ENSOMYG00000043194	13	41596447..41603139	7.92726	2.59475	6.04084	7.81248e-05	0.00142596	1	ENSOMYG00000043194	ENSOMYG00000043194	protein_coding
gpx3_1	14	35887684..35894707	1.54691	2.59359	6.036	0.00212903	0.0185775	1	ENSOMYG00000035866	ENSOMYG00000035866	protein_coding
BEST3_2	21	complement(1500574..1516608)	21.1822	2.59225	6.03038	1.34292e-09	1.69274e-07	4.94665e-05	ENSOMYG00000073797	ENSOMYG00000073797	protein_coding
arl8bb	17	complement(75494903..75513730)	26.3344	2.58957	6.01919	3.65606e-09	3.89501e-07	0.000134671	ENSOMYG00000022701	ENSOMYG00000022701	protein_coding
ypel3_1	12	complement(61604769..61612090)	2.39146	2.58896	6.01665	0.00288312	0.0234237	1	ENSOMYG00000017802	ENSOMYG00000017802	protein_coding
LRTM2_1	15	65140992..65147263	1.40442	2.58704	6.00863	0.000388173	0.00506076	1	ENSOMYG00000034306	ENSOMYG00000034306	protein_coding
pla2g6_1	13	complement(8739355..8787216)	8.78643	2.58358	5.99424	2.07773e-08	1.70655e-06	0.000765332	ENSOMYG00000049417	ENSOMYG00000049417	protein_coding
lig4	7	complement(27704018..27706756)	1.92616	2.58242	5.98945	1.05701e-06	4.53514e-05	0.0389349	ENSOMYG00000014039	ENSOMYG00000014039	protein_coding
gene:ENSOMYG00000032127	8	33436322..33444551	12.396	2.58168	5.98635	1.72544e-11	4.52918e-09	6.35564e-07	ENSOMYG00000032127	ENSOMYG00000032127	protein_coding
ANKLE2_2	11	64500291..64508334	14.7893	2.57635	5.96428	1.0635e-09	1.40305e-07	3.91742e-05	ENSOMYG00000026394	ENSOMYG00000026394	protein_coding
FDPS_1	2	17421692..17426002	27.4361	2.57559	5.96116	8.79461e-11	1.68367e-08	3.23949e-06	ENSOMYG00000065726	ENSOMYG00000065726	protein_coding
gene:ENSOMYG00000033694	13	complement(3132992..3159152)	16.6255	2.57533	5.96007	2.86767e-09	3.21659e-07	0.00010563	ENSOMYG00000033694	ENSOMYG00000033694	protein_coding
gene:ENSOMYG00000040941	28	complement(13244618..13261471)	21.8436	2.57125	5.94323	6.39152e-10	9.1944e-08	2.35432e-05	ENSOMYG00000040941	ENSOMYG00000040941	protein_coding
gene:ENSOMYG00000036123	23	complement(37682665..37692172)	4.60184	2.56958	5.93637	7.82637e-10	1.09492e-07	2.88284e-05	ENSOMYG00000036123	ENSOMYG00000036123	protein_coding
gene:ENSOMYG00000054608	11	80136971..80159341	0.75058	2.56633	5.92299	0.00652621	0.0428371	1	ENSOMYG00000054608	ENSOMYG00000054608	protein_coding
gene:ENSOMYG00000068917	Y	37056252..37059274	95.6832	2.56373	5.91235	0.00324503	0.0255804	1	ENSOMYG00000068917	ENSOMYG00000068917	protein_coding
yipf2_2	13	51562592..51565747	2.87729	2.56336	5.91081	1.22384e-06	5.12525e-05	0.0450803	ENSOMYG00000018150	ENSOMYG00000018150	protein_coding
CMPK2	25	complement(9573231..9593025)	0.879465	2.56164	5.90377	0.00149641	0.0142542	1	ENSOMYG00000024141	ENSOMYG00000024141	protein_coding
TTC39C_2	8	67693741..67727141	1.87956	2.55949	5.89497	1.94973e-05	0.000475093	0.718185	ENSOMYG00000036309	ENSOMYG00000036309	protein_coding
gene:ENSOMYG00000056337	17	15947401..15974553	14.8184	2.55388	5.87209	1.27889e-10	2.30943e-08	4.71078e-06	ENSOMYG00000056337	ENSOMYG00000056337	protein_coding
EGLN3	25	complement(30858521..30871849)	14.1686	2.55206	5.86472	1.4901e-06	6.00477e-05	0.0548877	ENSOMYG00000018467	ENSOMYG00000018467	protein_coding
gene:ENSOMYG00000039938	12	74624451..74631471	20.3945	2.55187	5.86396	6.70583e-09	6.51694e-07	0.000247009	ENSOMYG00000039938	ENSOMYG00000039938	protein_coding
NPRL2	17	79359439..79365461	10.433	2.55157	5.8627	3.60145e-09	3.8692e-07	0.000132659	ENSOMYG00000012655	ENSOMYG00000012655	protein_coding
zbtb16a_2	12	complement(39573288..39690763)	3.04997	2.5512	5.86121	2.24677e-06	8.29089e-05	0.0827596	ENSOMYG00000037936	ENSOMYG00000037936	protein_coding
POLK_1	6	32925881..32936892	0.748517	2.54784	5.84759	3.79486e-05	0.000818161	1	ENSOMYG00000042033	ENSOMYG00000042033	protein_coding
ZFYVE1_1	8	6762312..6786310	3.21548	2.54683	5.84349	2.33447e-08	1.87509e-06	0.000859903	ENSOMYG00000003004	ENSOMYG00000003004	protein_coding
gene:ENSOMYG00000028632	15	complement(31341294..31344227)	7.85877	2.54391	5.83165	7.43893e-05	0.00137254	1	ENSOMYG00000028632	ENSOMYG00000028632	protein_coding
TRMO	10	69469354..69472859	5.2809	2.54318	5.82871	2.95241e-06	0.000102434	0.108752	ENSOMYG00000038683	ENSOMYG00000038683	protein_coding
gene:ENSOMYG00000032450	2	complement(39219244..39220617)	2.2318	2.54184	5.82333	0.000258448	0.00367079	1	ENSOMYG00000032450	ENSOMYG00000032450	protein_coding
gene:ENSOMYG00000044636	1	complement(52645974..52655234)	9.55494	2.54173	5.82288	0.00104958	0.0108902	1	ENSOMYG00000044636	ENSOMYG00000044636	protein_coding
gene:ENSOMYG00000039735	4	43740156..43768518	30.4584	2.54135	5.82133	1.49528e-08	1.30386e-06	0.000550786	ENSOMYG00000039735	ENSOMYG00000039735	protein_coding
fancf	30	complement(5763156..5764653)	2.45863	2.5411	5.82031	0.000282626	0.00394098	1	ENSOMYG00000001676	ENSOMYG00000001676	protein_coding
gene:ENSOMYG00000003907	10	complement(63864709..63866985)	1.26477	2.54101	5.81996	0.000494273	0.00602213	1	ENSOMYG00000003907	ENSOMYG00000003907	protein_coding
ubox5_2	11	complement(71458365..71464372)	4.97309	2.53899	5.8118	1.43815e-09	1.76049e-07	5.29742e-05	ENSOMYG00000019647	ENSOMYG00000019647	protein_coding
atg101_2	12	complement(32413730..32416281)	9.77487	2.53834	5.80922	5.18883e-08	3.74272e-06	0.00191131	ENSOMYG00000039557	ENSOMYG00000039557	protein_coding
gene:ENSOMYG00000046325	27	12282044..12303866	5.67505	2.53829	5.809	3.45683e-12	1.16441e-09	1.27332e-07	ENSOMYG00000046325	ENSOMYG00000046325	protein_coding
ctsla	12	15324069..15328086	814.838	2.53501	5.79581	4.71182e-09	4.72332e-07	0.00017356	ENSOMYG00000033910	ENSOMYG00000033910	protein_coding
hoxd11a_2	22	complement(44954057..44963461)	6.78008	2.53273	5.78667	0.00529064	0.0368801	1	ENSOMYG00000023566	ENSOMYG00000023566	protein_coding
gene:ENSOMYG00000022429	Y	complement(45095129..45115365)	25.2989	2.52996	5.77558	2.85201e-09	3.21318e-07	0.000105054	ENSOMYG00000022429	ENSOMYG00000022429	protein_coding
fgl2a_1	15	complement(72422246..72427074)	98.7073	2.52672	5.76261	1.10339e-09	1.41891e-07	4.06434e-05	ENSOMYG00000056849	ENSOMYG00000056849	protein_coding
flcn_2	3	complement(10168241..10178397)	21.5122	2.52245	5.74556	5.65076e-12	1.71285e-09	2.08146e-07	ENSOMYG00000002423	ENSOMYG00000002423	protein_coding
gene:ENSOMYG00000039016	18	51976068..51980428	0.437392	2.51875	5.73084	0.00451536	0.0327364	1	ENSOMYG00000039016	ENSOMYG00000039016	protein_coding
gene:ENSOMYG00000077776	18	8679519..8682396	0.84816	2.5095	5.69423	0.00013427	0.00220283	1	ENSOMYG00000077776	ENSOMYG00000077776	protein_coding
irak4	2	complement(64179757..64210365)	6.05864	2.50516	5.67714	1.15489e-09	1.46298e-07	4.25405e-05	ENSOMYG00000030965	ENSOMYG00000030965	protein_coding
cep57l1	4	complement(26680874..26685442)	2.20564	2.50226	5.66574	0.000183364	0.00280747	1	ENSOMYG00000008571	ENSOMYG00000008571	protein_coding
dtnbp1a	2	complement(5754227..5812367)	9.70989	2.50167	5.66341	2.63738e-10	4.38908e-08	9.71478e-06	ENSOMYG00000000551	ENSOMYG00000000551	protein_coding
RAB9A_1	3	complement(77080268..77080873)	4.77865	2.49601	5.64124	0.000565316	0.00669181	1	ENSOMYG00000028121	ENSOMYG00000028121	protein_coding
tmem237b_2	18	24131061..24134047	3.1175	2.49422	5.63425	4.44692e-05	0.000924306	1	ENSOMYG00000013566	ENSOMYG00000013566	protein_coding
stx18_1	7	complement(73740126..73779079)	4.62396	2.48743	5.60779	1.47668e-06	5.9776e-05	0.0543933	ENSOMYG00000014710	ENSOMYG00000014710	protein_coding
ptk2ab_2	3	3579551..3707767	3.40131	2.48651	5.60422	1.87234e-08	1.55288e-06	0.000689677	ENSOMYG00000027000	ENSOMYG00000027000	protein_coding
gene:ENSOMYG00000006298	16	complement(454125..457652)	0.353351	2.48614	5.60277	0.00267628	0.0221461	1	ENSOMYG00000006298	ENSOMYG00000006298	protein_coding
arl5a	22	37222727..37237946	20.8761	2.48422	5.59531	2.75379e-10	4.55255e-08	1.01436e-05	ENSOMYG00000043393	ENSOMYG00000043393	protein_coding
HOXB3_1	12	complement(67439150..67463991)	3.66102	2.481	5.58284	1.707e-10	2.95672e-08	6.28775e-06	ENSOMYG00000021314	ENSOMYG00000021314	protein_coding
nfe2l1a_2	13	33771422..33781450	21.6903	2.47689	5.56697	1.05476e-07	6.61482e-06	0.00388519	ENSOMYG00000003587	ENSOMYG00000003587	protein_coding
cluap1	16	21051133..21079984	17.7877	2.47628	5.56459	1.20934e-11	3.32744e-09	4.45459e-07	ENSOMYG00000005065	ENSOMYG00000005065	protein_coding
heca_1	4	18512207..18516472	1.5871	2.47534	5.56097	5.12753e-05	0.00102929	1	ENSOMYG00000021809	ENSOMYG00000021809	protein_coding
tent2	6	complement(51800563..51842938)	6.33782	2.47206	5.54837	2.81959e-08	2.19549e-06	0.0010386	ENSOMYG00000001690	ENSOMYG00000001690	protein_coding
gene:ENSOMYG00000069580	31	5730894..5743250	6.22557	2.46863	5.53517	1.33617e-08	1.18542e-06	0.000492177	ENSOMYG00000069580	ENSOMYG00000069580	protein_coding
gene:ENSOMYG00000005919	2	14028426..14043268	10.9449	2.45697	5.49062	1.37512e-07	8.28848e-06	0.00506525	ENSOMYG00000005919	ENSOMYG00000005919	protein_coding
rnf150b	9	complement(3306571..3337370)	3.82596	2.45691	5.49039	9.99656e-07	4.34356e-05	0.0368223	ENSOMYG00000058101	ENSOMYG00000058101	protein_coding
slc35e4_1	5	complement(36184853..36197810)	6.23571	2.45309	5.47588	6.44711e-09	6.28952e-07	0.000237479	ENSOMYG00000021859	ENSOMYG00000021859	protein_coding
gene:ENSOMYG00000034054	17	complement(9544786..9577775)	7.00732	2.45229	5.47285	5.55221e-07	2.66737e-05	0.0204516	ENSOMYG00000034054	ENSOMYG00000034054	protein_coding
ghr1	5	28439078..28463945	60.2083	2.44867	5.45914	9.56806e-10	1.27337e-07	3.5244e-05	ENSOMYG00000034417	ENSOMYG00000034417	protein_coding
SLC25A34	7	71322728..71332267	2.00606	2.44811	5.45703	1.42645e-05	0.000368837	0.525433	ENSOMYG00000044416	ENSOMYG00000044416	protein_coding
fa18b	13	63422386..63426368	5.36685	2.44678	5.45199	6.51597e-06	0.000197512	0.240016	ENSOMYG00000007985	ENSOMYG00000007985	protein_coding
gene:ENSOMYG00000023981	8	74806768..74813148	0.565231	2.44464	5.44388	1.79334e-05	0.000443715	0.660577	ENSOMYG00000023981	ENSOMYG00000023981	protein_coding
gene:ENSOMYG00000044463	23	complement(46425698..46435635)	19.5548	2.44316	5.43833	5.77227e-09	5.69665e-07	0.000212622	ENSOMYG00000044463	ENSOMYG00000044463	protein_coding
gene:ENSOMYG00000023309	3	complement(21376326..21384481)	1.7884	2.44207	5.43422	0.0016763	0.0154835	1	ENSOMYG00000023309	ENSOMYG00000023309	protein_coding
aifm4	27	complement(19329267..19339483)	8.92438	2.43857	5.42105	4.34025e-05	0.000907443	1	ENSOMYG00000030657	ENSOMYG00000030657	protein_coding
TMEM30A_1	4	complement(11894799..11900548)	1.78457	2.43847	5.42067	0.000847722	0.00918498	1	ENSOMYG00000048151	ENSOMYG00000048151	protein_coding
sat1	15	14186592..14254054	62.143	2.43724	5.41604	2.52676e-09	2.88504e-07	9.30732e-05	ENSOMYG00000010129	ENSOMYG00000010129	protein_coding
gene:ENSOMYG00000001546	1	complement(6538098..6551603)	0.598303	2.43688	5.41471	0.000513783	0.00621364	1	ENSOMYG00000001546	ENSOMYG00000001546	protein_coding
ifngr2a	3	complement(78084705..78096610)	10.3529	2.43615	5.41196	3.75266e-11	8.21162e-09	1.38229e-06	ENSOMYG00000000269	ENSOMYG00000000269	protein_coding
gene:ENSOMYG00000027853	14	complement(23502518..23514817)	3.24381	2.43448	5.4057	0.000210697	0.0031245	1	ENSOMYG00000027853	ENSOMYG00000027853	protein_coding
si:dkeyp-69e1.8_2	13	complement(45133729..45135684)	34.2119	2.43136	5.39401	1.77306e-09	2.0998e-07	6.53106e-05	ENSOMYG00000022458	ENSOMYG00000022458	protein_coding
oser1	7	complement(33332998..33414727)	44.6226	2.42836	5.38282	3.85402e-09	4.02176e-07	0.000141963	ENSOMYG00000007597	ENSOMYG00000007597	protein_coding
gene:ENSOMYG00000031015	19	complement(45798634..45811762)	31.1459	2.42792	5.38117	4.07185e-10	6.24562e-08	1.49986e-05	ENSOMYG00000031015	ENSOMYG00000031015	protein_coding
ctsl.1	19	complement(56805557..56811838)	3.09172	2.42448	5.36834	1.13546e-05	0.000307893	0.418248	ENSOMYG00000008428	ENSOMYG00000008428	protein_coding
gene:ENSOMYG00000040835	30	12080542..12084943	9.80997	2.42232	5.36033	5.93153e-09	5.83122e-07	0.000218488	ENSOMYG00000040835	ENSOMYG00000040835	protein_coding
gene:ENSOMYG00000033677	17	1583436..1609147	14.6455	2.41992	5.35142	9.46627e-08	6.05078e-06	0.0034869	ENSOMYG00000033677	ENSOMYG00000033677	protein_coding
dedd1_1	2	20681604..20693732	2.39069	2.41957	5.3501	9.2843e-08	5.96962e-06	0.00341987	ENSOMYG00000026332	ENSOMYG00000026332	protein_coding
gene:ENSOMYG00000055390	23	49437098..49439212	6.20293	2.41666	5.33935	9.32565e-07	4.09396e-05	0.034351	ENSOMYG00000055390	ENSOMYG00000055390	protein_coding
si:dkey-86e18.1	5	complement(71817735..71826752)	4.57966	2.41389	5.32911	7.82502e-05	0.00142723	1	ENSOMYG00000032394	ENSOMYG00000032394	protein_coding
gene:ENSOMYG00000016472	21	complement(23141070..23153852)	0.53675	2.41173	5.32112	0.000216063	0.00318368	1	ENSOMYG00000016472	ENSOMYG00000016472	protein_coding
arhgef18a_1	8	complement(82763413..82814228)	1.51223	2.41144	5.32006	3.25673e-06	0.000110564	0.119962	ENSOMYG00000001704	ENSOMYG00000001704	protein_coding
pdlim3a	10	60914389..60926834	36.3146	2.40277	5.28817	4.72327e-07	2.31277e-05	0.0173982	ENSOMYG00000017729	ENSOMYG00000017729	protein_coding
abraxas1_1	5	39773147..39776295	1.11584	2.40188	5.2849	0.00175505	0.0159997	1	ENSOMYG00000042010	ENSOMYG00000042010	protein_coding
zgc:92606_2	3	complement(11365852..11367002)	85.1529	2.40063	5.28034	6.26157e-09	6.132e-07	0.000230645	ENSOMYG00000027741	ENSOMYG00000027741	protein_coding
gene:ENSOMYG00000025668	16	complement(38572209..38577408)	3.36293	2.40043	5.27959	1.0201e-05	0.000282303	0.375754	ENSOMYG00000025668	ENSOMYG00000025668	protein_coding
CUL1	11	complement(17370988..17381958)	64.3587	2.39762	5.26934	2.51909e-07	1.39134e-05	0.00927905	ENSOMYG00000008809	ENSOMYG00000008809	protein_coding
praf3	7	complement(46457015..46468085)	13.3683	2.3972	5.26781	2.25341e-11	5.36228e-09	8.30045e-07	ENSOMYG00000018762	ENSOMYG00000018762	protein_coding
gene:ENSOMYG00000040283	27	complement(1961701..1966656)	3.15983	2.39659	5.26558	2.35308e-06	8.60834e-05	0.0866756	ENSOMYG00000040283	ENSOMYG00000040283	protein_coding
gene:ENSOMYG00000027875	7	complement(60397127..60459383)	0.496261	2.39357	5.25455	0.000760893	0.00839422	1	ENSOMYG00000027875	ENSOMYG00000027875	protein_coding
cbx7a_1	12	75444407..75462365	11.5726	2.39337	5.25384	1.40869e-09	1.74814e-07	5.1889e-05	ENSOMYG00000037448	ENSOMYG00000037448	protein_coding
prkab1a_1	5	complement(35365365..35373091)	8.6504	2.39331	5.25362	3.19329e-09	3.51981e-07	0.000117625	ENSOMYG00000037880	ENSOMYG00000037880	protein_coding
gene:ENSOMYG00000035648	30	36767873..36791992	0.280691	2.39322	5.25327	0.00691039	0.0447716	1	ENSOMYG00000035648	ENSOMYG00000035648	protein_coding
gene:ENSOMYG00000003100	6	complement(20780039..20789251)	14.1199	2.39319	5.25318	8.58716e-11	1.65641e-08	3.16308e-06	ENSOMYG00000003100	ENSOMYG00000003100	protein_coding
gene:ENSOMYG00000030746	12	23493855..23707665	1.66908	2.38718	5.23132	6.17368e-08	4.28322e-06	0.00227408	ENSOMYG00000030746	ENSOMYG00000030746	protein_coding
gene:ENSOMYG00000027877	17	complement(61871368..61885606)	29.2223	2.38605	5.22722	9.54907e-09	8.8414e-07	0.00035174	ENSOMYG00000027877	ENSOMYG00000027877	protein_coding
CEP85L_1	4	17221397..17292232	9.90658	2.38407	5.22006	3.95641e-09	4.04862e-07	0.000145734	ENSOMYG00000001152	ENSOMYG00000001152	protein_coding
gene:ENSOMYG00000043598	17	39906097..39917763	9.21341	2.38188	5.21215	4.60678e-05	0.000950931	1	ENSOMYG00000043598	ENSOMYG00000043598	protein_coding
gene:ENSOMYG00000001903	1	complement(19880629..19886927)	1.18146	2.38035	5.20664	0.000159257	0.00249692	1	ENSOMYG00000001903	ENSOMYG00000001903	protein_coding
slc25a38b_2	17	25963320..25977505	10.3198	2.37787	5.1977	1.33856e-10	2.40017e-08	4.93058e-06	ENSOMYG00000060862	ENSOMYG00000060862	protein_coding
gene:ENSOMYG00000061387	6	complement(78735286..78736743)	16.9368	2.37417	5.18439	0.000139125	0.00225918	1	ENSOMYG00000061387	ENSOMYG00000061387	protein_coding
calhm6_1	2	42971152..42976177	0.722671	2.37322	5.18098	0.00435914	0.0319474	1	ENSOMYG00000000154	ENSOMYG00000000154	protein_coding
gene:ENSOMYG00000062394	17	complement(2554523..2642321)	5.5703	2.37232	5.17772	2.29744e-10	3.874e-08	8.46261e-06	ENSOMYG00000062394	ENSOMYG00000062394	protein_coding
gene:ENSOMYG00000042478	9	56831444..56838328	47.369	2.37089	5.1726	5.974e-10	8.74195e-08	2.20052e-05	ENSOMYG00000042478	ENSOMYG00000042478	protein_coding
EN1_2	7	20094107..20098068	3.47419	2.36909	5.16616	0.00163748	0.0152445	1	ENSOMYG00000046484	ENSOMYG00000046484	protein_coding
gene:ENSOMYG00000046843	17	complement(54744433..54758833)	1.98487	2.36862	5.16448	4.74269e-05	0.000973074	1	ENSOMYG00000046843	ENSOMYG00000046843	protein_coding
gene:ENSOMYG00000039662	28	complement(27933821..27937040)	2.53574	2.36818	5.16289	4.64156e-06	0.000149599	0.170972	ENSOMYG00000039662	ENSOMYG00000039662	protein_coding
gene:ENSOMYG00000041116	13	complement(32944271..32944978)	235.077	2.36715	5.15922	2.05004e-07	1.17299e-05	0.00755131	ENSOMYG00000041116	ENSOMYG00000041116	protein_coding
gene:ENSOMYG00000029399	6	complement(93230728..93268484)	7.7352	2.36481	5.15084	0.000227345	0.00331728	1	ENSOMYG00000029399	ENSOMYG00000029399	protein_coding
gene:ENSOMYG00000045774	20	complement(34471833..34479636)	138.081	2.36268	5.14325	7.8116e-08	5.11398e-06	0.0028774	ENSOMYG00000045774	ENSOMYG00000045774	protein_coding
gene:ENSOMYG00000048312	13	6856347..6877683	3.6654	2.36139	5.13866	3.12289e-07	1.67753e-05	0.0115032	ENSOMYG00000048312	ENSOMYG00000048312	protein_coding
RB1CC1_1	8	complement(71092354..71110198)	9.43991	2.36076	5.13642	1.52529e-08	1.32099e-06	0.000561842	ENSOMYG00000025339	ENSOMYG00000025339	protein_coding
gene:ENSOMYG00000013846	9	14263157..14275272	1.74731	2.36005	5.13389	0.000547902	0.00652206	1	ENSOMYG00000013846	ENSOMYG00000013846	protein_coding
gene:ENSOMYG00000077463	13	62362986..62370372	7.1968	2.35527	5.11692	6.06254e-07	2.87993e-05	0.0223314	ENSOMYG00000077463	ENSOMYG00000077463	protein_coding
gene:ENSOMYG00000037505	14	13247375..13249798	1.16394	2.35063	5.10047	0.00302227	0.0242143	1	ENSOMYG00000037505	ENSOMYG00000037505	protein_coding
gene:ENSOMYG00000025788	17	complement(5170452..5234578)	0.624633	2.35036	5.0995	0.000743982	0.00826135	1	ENSOMYG00000025788	ENSOMYG00000025788	protein_coding
flcn_1	2	complement(18696278..18706901)	7.1483	2.34962	5.09689	3.19214e-09	3.51981e-07	0.000117582	ENSOMYG00000002368	ENSOMYG00000002368	protein_coding
gene:ENSOMYG00000014949	4	complement(38812365..38814702)	28.8906	2.34924	5.09555	4.61322e-07	2.27639e-05	0.0169928	ENSOMYG00000014949	ENSOMYG00000014949	protein_coding
gene:ENSOMYG00000070143	13	3407133..3408486	9.7021	2.34832	5.0923	2.96957e-07	1.60533e-05	0.0109384	ENSOMYG00000070143	ENSOMYG00000070143	protein_coding
gene:ENSOMYG00000043266	24	complement(27820862..27917271)	3.40156	2.34698	5.08759	3.13684e-08	2.37004e-06	0.00115545	ENSOMYG00000043266	ENSOMYG00000043266	protein_coding
gene:ENSOMYG00000004391	2	44465657..44472105	9.42623	2.34666	5.08645	4.34971e-09	4.39494e-07	0.000160222	ENSOMYG00000004391	ENSOMYG00000004391	protein_coding
gene:ENSOMYG00000070532	10	complement(63228358..63390541)	1.00251	2.34545	5.08219	1.34287e-06	5.52376e-05	0.0494645	ENSOMYG00000070532	ENSOMYG00000070532	protein_coding
gene:ENSOMYG00000068674	22	19734405..19743223	5.62674	2.34296	5.07343	1.74069e-08	1.46275e-06	0.000641182	ENSOMYG00000068674	ENSOMYG00000068674	protein_coding
gene:ENSOMYG00000026173	6	complement(78737319..78751600)	32.3263	2.34104	5.06669	2.33336e-05	0.00055062	0.859492	ENSOMYG00000026173	ENSOMYG00000026173	protein_coding
ppl_1	12	complement(98333682..98364571)	3.88153	2.33799	5.05596	5.44739e-08	3.89611e-06	0.00200655	ENSOMYG00000058915	ENSOMYG00000058915	protein_coding
TPPP	2	complement(6317942..6334213)	1.3473	2.33792	5.05575	0.00356928	0.0274814	1	ENSOMYG00000038511	ENSOMYG00000038511	protein_coding
gene:ENSOMYG00000006589	7	complement(13550626..13551960)	4.6321	2.33716	5.05309	1.39409e-05	0.000362577	0.513513	ENSOMYG00000006589	ENSOMYG00000006589	protein_coding
gene:ENSOMYG00000020911	31	complement(16617228..16619309)	1.17571	2.33634	5.05021	0.00259437	0.0216	1	ENSOMYG00000020911	ENSOMYG00000020911	protein_coding
gene:ENSOMYG00000042384	9	56602664..56641278	3.04447	2.33218	5.03567	0.000365124	0.00482199	1	ENSOMYG00000042384	ENSOMYG00000042384	protein_coding
arl4aa_2	3	26116471..26117073	5.04031	2.33032	5.02918	9.85992e-05	0.00172902	1	ENSOMYG00000011613	ENSOMYG00000011613	protein_coding
gene:ENSOMYG00000022027	5	42985602..42995813	11.7874	2.32906	5.02479	0.000149656	0.00238456	1	ENSOMYG00000022027	ENSOMYG00000022027	protein_coding
bach1b	Y	complement(43450767..43458299)	3.23388	2.3286	5.02319	3.75716e-07	1.94441e-05	0.0138395	ENSOMYG00000070234	ENSOMYG00000070234	protein_coding
irs2a	7	complement(27744733..27765618)	10.6224	2.32818	5.02171	0.000149755	0.00238466	1	ENSOMYG00000014046	ENSOMYG00000014046	protein_coding
gene:ENSOMYG00000044528	23	complement(46437038..46438138)	10.3477	2.3272	5.01829	3.30552e-07	1.7498e-05	0.0121759	ENSOMYG00000044528	ENSOMYG00000044528	protein_coding
gene:ENSOMYG00000009240	17	83890445..83892016	0.8248	2.32667	5.01645	0.00646145	0.0425701	1	ENSOMYG00000009240	ENSOMYG00000009240	protein_coding
gde1_1	13	complement(11714105..11721662)	5.0298	2.32521	5.01139	9.30256e-05	0.00164946	1	ENSOMYG00000036364	ENSOMYG00000036364	protein_coding
dpcd_2	17	23400291..23403947	1.71533	2.32037	4.99459	3.77891e-05	0.000815413	1	ENSOMYG00000030065	ENSOMYG00000030065	protein_coding
gene:ENSOMYG00000027428	2	24549489..24556846	4.63512	2.31921	4.9906	1.81488e-07	1.05987e-05	0.00668512	ENSOMYG00000027428	ENSOMYG00000027428	protein_coding
gene:ENSOMYG00000024124	2	9445594..9480755	4.39221	2.31825	4.98729	1.19989e-07	7.34682e-06	0.0044198	ENSOMYG00000024124	ENSOMYG00000024124	protein_coding
capslb	5	complement(39522656..39525071)	10.8797	2.31703	4.98305	9.72795e-07	4.24132e-05	0.0358329	ENSOMYG00000041310	ENSOMYG00000041310	protein_coding
rbm48	32	complement(17391385..17393732)	3.88755	2.31666	4.98179	4.32366e-08	3.19098e-06	0.00159262	ENSOMYG00000015989	ENSOMYG00000015989	protein_coding
gene:ENSOMYG00000002479	7	12844516..12863589	1.216	2.31278	4.96839	0.000447032	0.00560552	1	ENSOMYG00000002479	ENSOMYG00000002479	protein_coding
mvk_2	11	46335150..46359887	1.16744	2.30973	4.95791	0.000899784	0.00963023	1	ENSOMYG00000019869	ENSOMYG00000019869	protein_coding
gene:ENSOMYG00000022836	7	complement(79261511..79275558)	4.88705	2.3097	4.9578	6.93659e-07	3.18808e-05	0.0255509	ENSOMYG00000022836	ENSOMYG00000022836	protein_coding
nrbp2b_1	11	37260605..37331859	4.86149	2.3082	4.95266	1.80491e-08	1.50678e-06	0.00066484	ENSOMYG00000044314	ENSOMYG00000044314	protein_coding
gene:ENSOMYG00000003003	9	27588793..27596320	79.7605	2.30816	4.95252	5.67242e-07	2.71487e-05	0.0208944	ENSOMYG00000003003	ENSOMYG00000003003	protein_coding
tpd52l2a_1	9	59019312..59022098	1.77005	2.30542	4.9431	0.00458883	0.0330994	1	ENSOMYG00000013928	ENSOMYG00000013928	protein_coding
ssh2b	Y	37535444..37547463	3.14299	2.30441	4.93966	2.58733e-05	0.000598896	0.953042	ENSOMYG00000045134	ENSOMYG00000045134	protein_coding
gene:ENSOMYG00000071083	5	complement(42934792..42974540)	0.279852	2.30349	4.93652	0.00370182	0.028195	1	ENSOMYG00000071083	ENSOMYG00000071083	protein_coding
retreg2_2	18	complement(27949460..27976125)	8.29296	2.30341	4.93623	3.50693e-10	5.61384e-08	1.29178e-05	ENSOMYG00000034273	ENSOMYG00000034273	protein_coding
shox_2	22	complement(4282610..4294812)	0.363155	2.30309	4.93512	0.00649764	0.042728	1	ENSOMYG00000033448	ENSOMYG00000033448	protein_coding
TSC22D2	1	complement(8373154..8420956)	6.26902	2.30079	4.92726	5.84361e-10	8.60057e-08	2.15249e-05	ENSOMYG00000000356	ENSOMYG00000000356	protein_coding
gene:ENSOMYG00000013049	13	42922143..42931517	18.3395	2.29952	4.92293	6.90229e-08	4.68656e-06	0.00254246	ENSOMYG00000013049	ENSOMYG00000013049	protein_coding
atg14_2	25	complement(31623553..31630632)	22.8844	2.29593	4.9107	3.86262e-08	2.87574e-06	0.0014228	ENSOMYG00000019993	ENSOMYG00000019993	protein_coding
ifit9_4	20	12667171..12679710	2.28113	2.2957	4.90991	2.87703e-05	0.000655232	1	ENSOMYG00000016409	ENSOMYG00000016409	protein_coding
f2_2	26	complement(17760664..17767159)	1.55664	2.29534	4.90869	0.00291148	0.0236089	1	ENSOMYG00000042406	ENSOMYG00000042406	protein_coding
zfand2a_1	12	72126339..72129772	8.70832	2.29466	4.9064	2.38427e-08	1.90035e-06	0.000878246	ENSOMYG00000014180	ENSOMYG00000014180	protein_coding
dmrt2b_2	30	39713327..39722642	31.4803	2.29296	4.9006	5.64715e-08	3.98304e-06	0.00208013	ENSOMYG00000004227	ENSOMYG00000004227	protein_coding
spef2	6	8937363..8984249	0.244366	2.29258	4.8993	0.00755072	0.0476472	1	ENSOMYG00000007664	ENSOMYG00000007664	protein_coding
si:dkey-42i9.4	7	87054505..87056155	4.38946	2.28927	4.88808	1.52139e-05	0.000388543	0.560406	ENSOMYG00000001542	ENSOMYG00000001542	protein_coding
gene:ENSOMYG00000022084	6	complement(50849145..50875422)	50.4941	2.2877	4.88277	7.12633e-08	4.78472e-06	0.00262498	ENSOMYG00000022084	ENSOMYG00000022084	protein_coding
zfand2a_2	13	39084693..39092694	18.4751	2.28555	4.8755	6.38833e-10	9.1944e-08	2.35314e-05	ENSOMYG00000016286	ENSOMYG00000016286	protein_coding
gene:ENSOMYG00000045804	23	47223467..47229721	2.55105	2.28498	4.87358	0.000152157	0.00240935	1	ENSOMYG00000045804	ENSOMYG00000045804	protein_coding
MTERF1	18	complement(44010594..44011757)	2.39266	2.27927	4.85431	0.000174397	0.00268796	1	ENSOMYG00000022305	ENSOMYG00000022305	protein_coding
gene:ENSOMYG00000012625	2	66370609..66374764	1.79836	2.27748	4.8483	4.25379e-05	0.000892604	1	ENSOMYG00000012625	ENSOMYG00000012625	protein_coding
ARHGAP9_1	7	36954655..37013322	9.36236	2.27429	4.83759	3.24812e-06	0.000110419	0.119644	ENSOMYG00000021030	ENSOMYG00000021030	protein_coding
gene:ENSOMYG00000067081	19	19326466..19328285	1.03717	2.27337	4.8345	0.00612638	0.0409853	1	ENSOMYG00000067081	ENSOMYG00000067081	protein_coding
dbf4_1	2	15467735..15477969	2.55143	2.26887	4.81945	1.58287e-06	6.26796e-05	0.0583049	ENSOMYG00000001303	ENSOMYG00000001303	protein_coding
syngr2b_2	17	14565448..14574055	31.615	2.26567	4.80879	0.00121556	0.0121422	1	ENSOMYG00000007365	ENSOMYG00000007365	protein_coding
gene:ENSOMYG00000038894	10	complement(79226172..79233525)	0.737165	2.26429	4.80417	0.00701335	0.0452659	1	ENSOMYG00000038894	ENSOMYG00000038894	protein_coding
gene:ENSOMYG00000044693	16	complement(27269831..27280444)	3.86398	2.26424	4.804	2.01513e-06	7.56775e-05	0.0742275	ENSOMYG00000044693	ENSOMYG00000044693	protein_coding
gene:ENSOMYG00000000610	3	15867916..15878533	5.27268	2.26258	4.7985	1.92721e-06	7.32399e-05	0.070989	ENSOMYG00000000610	ENSOMYG00000000610	protein_coding
gene:ENSOMYG00000011550	21	complement(20008843..20013809)	1.85451	2.26252	4.7983	1.08302e-05	0.000295879	0.398931	ENSOMYG00000011550	ENSOMYG00000011550	protein_coding
gene:ENSOMYG00000011365	13	2795611..2854677	0.672345	2.25823	4.78403	0.000192337	0.00292121	1	ENSOMYG00000011365	ENSOMYG00000011365	protein_coding
ccng2_2	12	complement(7607513..7612324)	7.28093	2.25654	4.77843	4.10929e-07	2.08013e-05	0.0151366	ENSOMYG00000014807	ENSOMYG00000014807	protein_coding
gene:ENSOMYG00000000118	2	29686140..29697591	12.2441	2.25512	4.77375	2.21363e-08	1.80075e-06	0.000815389	ENSOMYG00000000118	ENSOMYG00000000118	protein_coding
kmt5b_1	1	complement(28835762..28841607)	3.28506	2.25363	4.76883	4.07757e-06	0.000133793	0.150197	ENSOMYG00000027166	ENSOMYG00000027166	protein_coding
gene:ENSOMYG00000037369	17	complement(59013805..59023656)	5.96149	2.25226	4.76429	1.22683e-06	5.12932e-05	0.0451903	ENSOMYG00000037369	ENSOMYG00000037369	protein_coding
ppt1_1	18	complement(37922152..37928928)	14.7195	2.25077	4.75937	1.50271e-08	1.30587e-06	0.000553523	ENSOMYG00000038319	ENSOMYG00000038319	protein_coding
cbx7a_2	13	42377635..42395560	12.5077	2.25042	4.75822	6.50202e-08	4.48657e-06	0.00239502	ENSOMYG00000057955	ENSOMYG00000057955	protein_coding
gene:ENSOMYG00000024904	25	complement(45196997..45217264)	10.6033	2.25009	4.75712	2.25113e-09	2.61727e-07	8.29203e-05	ENSOMYG00000024904	ENSOMYG00000024904	protein_coding
TXLNB_1	4	complement(18523691..18545617)	708.438	2.24965	4.75567	1.01799e-05	0.000282045	0.374975	ENSOMYG00000021838	ENSOMYG00000021838	protein_coding
gene:ENSOMYG00000032064	10	78811868..78815226	144.354	2.24873	4.75263	1.42776e-05	0.000368837	0.525917	ENSOMYG00000032064	ENSOMYG00000032064	protein_coding
ATP6V1A_2	15	complement(14761292..14772978)	27.1059	2.24591	4.74337	1.02687e-06	4.42811e-05	0.0378248	ENSOMYG00000019036	ENSOMYG00000019036	protein_coding
zbtb18	20	complement(27983725..27987366)	1.78619	2.24189	4.73016	0.000357423	0.00473995	1	ENSOMYG00000044574	ENSOMYG00000044574	protein_coding
gene:ENSOMYG00000007564	10	complement(1269445..1273128)	8.99213	2.24065	4.72609	7.40219e-05	0.00136873	1	ENSOMYG00000007564	ENSOMYG00000007564	protein_coding
RSPO3_3	4	complement(22500632..22502530)	3.56137	2.23879	4.72001	0.000246836	0.00353629	1	ENSOMYG00000018367	ENSOMYG00000018367	protein_coding
acp2_2	26	complement(17265870..17280418)	2.9233	2.23775	4.71662	2.55981e-06	9.15421e-05	0.0942908	ENSOMYG00000028348	ENSOMYG00000028348	protein_coding
stx18_2	17	47287017..47308196	16.5836	2.23755	4.71595	2.30682e-09	2.66983e-07	8.49719e-05	ENSOMYG00000046513	ENSOMYG00000046513	protein_coding
gene:ENSOMYG00000074042	2	100638912..100656663	2.34525	2.23663	4.71294	6.10506e-07	2.89473e-05	0.022488	ENSOMYG00000074042	ENSOMYG00000074042	protein_coding
gene:ENSOMYG00000032343	14	complement(11091066..11093998)	2.80602	2.23621	4.71156	5.68869e-06	0.000177507	0.209543	ENSOMYG00000032343	ENSOMYG00000032343	protein_coding
zgc:175214_1	13	15428493..15432022	20.801	2.23597	4.71079	4.87439e-09	4.86712e-07	0.000179548	ENSOMYG00000027731	ENSOMYG00000027731	protein_coding
sprtn	4	complement(17932299..17935336)	0.757592	2.23373	4.70348	0.00485606	0.0345992	1	ENSOMYG00000017768	ENSOMYG00000017768	protein_coding
gene:ENSOMYG00000047781	22	complement(14121038..14132370)	1.61443	2.23324	4.70189	3.30101e-05	0.00072902	1	ENSOMYG00000047781	ENSOMYG00000047781	protein_coding
nfe2l1a_1	12	67150543..67162053	75.9435	2.23301	4.70114	1.28549e-05	0.000339888	0.473511	ENSOMYG00000021257	ENSOMYG00000021257	protein_coding
gene:ENSOMYG00000030271	7	16907163..16918810	2.26161	2.22931	4.6891	2.63612e-06	9.37444e-05	0.0971016	ENSOMYG00000030271	ENSOMYG00000030271	protein_coding
acads_2	Y	11460009..11464595	15.8864	2.22787	4.68443	2.53062e-07	1.39469e-05	0.00932155	ENSOMYG00000027020	ENSOMYG00000027020	protein_coding
arih2_1	9	complement(41026252..41033353)	179.894	2.22604	4.67848	2.92159e-07	1.58276e-05	0.0107617	ENSOMYG00000047730	ENSOMYG00000047730	protein_coding
gene:ENSOMYG00000075100	32	complement(5480059..5490065)	1.10857	2.22377	4.67112	1.30853e-05	0.000345015	0.481999	ENSOMYG00000075100	ENSOMYG00000075100	protein_coding
gene:ENSOMYG00000033082	27	12582520..12590514	8.63919	2.22321	4.66931	8.59677e-07	3.81343e-05	0.0316662	ENSOMYG00000033082	ENSOMYG00000033082	protein_coding
gene:ENSOMYG00000018931	10	61693476..61694225	6.02934	2.22103	4.66225	2.70482e-05	0.000622132	0.996319	ENSOMYG00000018931	ENSOMYG00000018931	protein_coding
gene:ENSOMYG00000024601	7	38261189..38261758	5.7976	2.21783	4.65194	0.00466962	0.0335302	1	ENSOMYG00000024601	ENSOMYG00000024601	protein_coding
gene:ENSOMYG00000004376	13	60041897..60124910	1.76292	2.2178	4.65183	7.75776e-08	5.10408e-06	0.00285757	ENSOMYG00000004376	ENSOMYG00000004376	protein_coding
vps9d1_1	1	24864829..24893331	3.08378	2.21697	4.64916	5.89659e-08	4.14456e-06	0.00217201	ENSOMYG00000033913	ENSOMYG00000033913	protein_coding
gene:ENSOMYG00000002096	6	20545188..20554361	4.30489	2.21493	4.6426	2.86611e-08	2.21379e-06	0.00105573	ENSOMYG00000002096	ENSOMYG00000002096	protein_coding
gene:ENSOMYG00000073181	15	complement(72271187..72281138)	4.01004	2.21474	4.64199	6.90136e-07	3.17762e-05	0.0254212	ENSOMYG00000073181	ENSOMYG00000073181	protein_coding
gene:ENSOMYG00000035836	12	15868491..15876650	49.6587	2.21451	4.64123	1.87942e-05	0.000460132	0.692284	ENSOMYG00000035836	ENSOMYG00000035836	protein_coding
gene:ENSOMYG00000007809	12	complement(7147626..7182371)	3.33285	2.21418	4.64018	1.59884e-08	1.36609e-06	0.000588931	ENSOMYG00000007809	ENSOMYG00000007809	protein_coding
CHST15_2	23	7179414..7218178	16.8179	2.21325	4.63717	3.12107e-06	0.000107245	0.114965	ENSOMYG00000074295	ENSOMYG00000074295	protein_coding
gene:ENSOMYG00000026716	31	25641193..25653309	3.18818	2.21235	4.63431	0.000102679	0.00177972	1	ENSOMYG00000026716	ENSOMYG00000026716	protein_coding
gene:ENSOMYG00000008720	19	57177391..57196953	0.831846	2.21136	4.63113	0.000273975	0.00384774	1	ENSOMYG00000008720	ENSOMYG00000008720	protein_coding
gene:ENSOMYG00000006804	3	complement(25568195..25575845)	1.73614	2.20985	4.62626	0.00448321	0.0325715	1	ENSOMYG00000006804	ENSOMYG00000006804	protein_coding
gpcpd1_2	8	36643589..36662840	29.658	2.20922	4.62427	1.6884e-07	9.97451e-06	0.00621924	ENSOMYG00000020190	ENSOMYG00000020190	protein_coding
dis3l_1	6	complement(92071806..92120356)	8.37485	2.20582	4.61337	1.33281e-07	8.07999e-06	0.0049094	ENSOMYG00000052777	ENSOMYG00000052777	protein_coding
gucy1b1_2	19	22779623..22830214	5.23132	2.20578	4.61325	2.95526e-06	0.000102434	0.108857	ENSOMYG00000010367	ENSOMYG00000010367	protein_coding
gene:ENSOMYG00000038987	17	complement(59073717..59075511)	7.89807	2.2035	4.60596	8.57846e-06	0.000242694	0.315987	ENSOMYG00000038987	ENSOMYG00000038987	protein_coding
gene:ENSOMYG00000042408	25	24772180..24774981	47.6109	2.20218	4.60173	2.38831e-08	1.90035e-06	0.000879736	ENSOMYG00000042408	ENSOMYG00000042408	protein_coding
prox3	9	complement(7383590..7386808)	0.772938	2.19823	4.58917	0.0016292	0.0151896	1	ENSOMYG00000065817	ENSOMYG00000065817	protein_coding
gene:ENSOMYG00000023616	3	3202829..3237769	1.69894	2.19591	4.58179	8.54671e-06	0.000242335	0.314818	ENSOMYG00000023616	ENSOMYG00000023616	protein_coding
gene:ENSOMYG00000010329	16	complement(43217668..43243507)	1.50175	2.1955	4.58049	0.000132665	0.0021793	1	ENSOMYG00000010329	ENSOMYG00000010329	protein_coding
gene:ENSOMYG00000000218	2	complement(29742879..29751690)	1.37124	2.19405	4.57589	0.000131999	0.00217256	1	ENSOMYG00000000218	ENSOMYG00000000218	protein_coding
ANKLE2_1	6	35308237..35318308	4.41595	2.19256	4.57117	1.01002e-07	6.39726e-06	0.00372039	ENSOMYG00000047668	ENSOMYG00000047668	protein_coding
bcl7bb_2	27	13642113..13644243	3.71171	2.18915	4.56036	1.72486e-05	0.000431087	0.635354	ENSOMYG00000041238	ENSOMYG00000041238	protein_coding
gene:ENSOMYG00000010228	7	complement(6346464..6354244)	0.727212	2.18913	4.56029	0.00203148	0.0179602	1	ENSOMYG00000010228	ENSOMYG00000010228	protein_coding
MFSD9	22	complement(8163260..8172015)	1.401	2.18832	4.55773	0.00109899	0.0112199	1	ENSOMYG00000044871	ENSOMYG00000044871	protein_coding
atosa_2	26	39790878..39807537	19.9562	2.18748	4.5551	3.14866e-07	1.68427e-05	0.0115981	ENSOMYG00000027656	ENSOMYG00000027656	protein_coding
gene:ENSOMYG00000026155	26	complement(39085173..39086660)	13.0024	2.18688	4.55319	2.65623e-06	9.41963e-05	0.0978423	ENSOMYG00000026155	ENSOMYG00000026155	protein_coding
gene:ENSOMYG00000033938	12	complement(15345143..15363060)	4.30836	2.18395	4.54396	1.25445e-06	5.21059e-05	0.0462078	ENSOMYG00000033938	ENSOMYG00000033938	protein_coding
gene:ENSOMYG00000003158	10	complement(63277702..63336667)	1.05156	2.18146	4.53612	0.000151911	0.00240694	1	ENSOMYG00000003158	ENSOMYG00000003158	protein_coding
gene:ENSOMYG00000077823	8	863967..867932	2.66362	2.17997	4.53145	9.86879e-05	0.00172938	1	ENSOMYG00000077823	ENSOMYG00000077823	protein_coding
txlnbb	19	complement(26654996..26660985)	415.85	2.17782	4.52469	4.35995e-08	3.20109e-06	0.00160599	ENSOMYG00000026608	ENSOMYG00000026608	protein_coding
gene:ENSOMYG00000008575	13	63703182..63714345	3.36029	2.17686	4.52167	3.3983e-08	2.55243e-06	0.00125176	ENSOMYG00000008575	ENSOMYG00000008575	protein_coding
klhl42_2	21	23157342..23159357	1.25225	2.17615	4.51945	0.000475037	0.0058545	1	ENSOMYG00000017202	ENSOMYG00000017202	protein_coding
gene:ENSOMYG00000021103	3	26655637..26684099	1.33272	2.17541	4.51713	2.57999e-05	0.00059774	0.950338	ENSOMYG00000021103	ENSOMYG00000021103	protein_coding
gene:ENSOMYG00000028190	8	complement(81449599..81516647)	45.0257	2.17499	4.51583	6.73562e-06	0.000202613	0.248107	ENSOMYG00000028190	ENSOMYG00000028190	protein_coding
gene:ENSOMYG00000007146	19	67001415..67087581	5.04401	2.17176	4.50572	2.21274e-08	1.80075e-06	0.000815064	ENSOMYG00000007146	ENSOMYG00000007146	protein_coding
si:ch211-260e23.9_1	6	complement(59847317..59851149)	114.852	2.17086	4.50292	1.62682e-06	6.40216e-05	0.0599237	ENSOMYG00000002891	ENSOMYG00000002891	protein_coding
gene:ENSOMYG00000009974	6	46472085..46513900	0.747276	2.16998	4.50017	0.00229923	0.0197181	1	ENSOMYG00000009974	ENSOMYG00000009974	protein_coding
hps5	30	complement(5071939..5122132)	2.22183	2.16922	4.49781	2.95133e-08	2.27029e-06	0.00108712	ENSOMYG00000000219	ENSOMYG00000000219	protein_coding
gene:ENSOMYG00000027244	12	77816470..77825186	1.83197	2.16854	4.49567	0.00011728	0.00198022	1	ENSOMYG00000027244	ENSOMYG00000027244	protein_coding
coq8aa_2	8	23597497..23614782	63.5887	2.16777	4.49327	9.69923e-07	4.23605e-05	0.0357271	ENSOMYG00000017541	ENSOMYG00000017541	protein_coding
gene:ENSOMYG00000047634	Y	19630141..19643317	25.4596	2.16707	4.49112	1.17425e-08	1.05277e-06	0.000432534	ENSOMYG00000047634	ENSOMYG00000047634	protein_coding
gene:ENSOMYG00000017496	10	60678041..60741501	4.50927	2.16538	4.48586	8.37548e-07	3.74506e-05	0.0308511	ENSOMYG00000017496	ENSOMYG00000017496	protein_coding
gene:ENSOMYG00000043705	24	complement(13985327..13993949)	2.56482	2.16475	4.4839	5.39653e-05	0.00107014	1	ENSOMYG00000043705	ENSOMYG00000043705	protein_coding
rgcc	22	10109177..10113289	194.427	2.16454	4.48325	1.19017e-06	5.00893e-05	0.0438398	ENSOMYG00000046983	ENSOMYG00000046983	protein_coding
garem_1	11	13877188..13882599	0.975557	2.1632	4.47908	0.000161744	0.00253124	1	ENSOMYG00000025172	ENSOMYG00000025172	protein_coding
cnot10_1	2	13046809..13061035	22.3759	2.16319	4.47903	4.68008e-08	3.41445e-06	0.00172391	ENSOMYG00000073977	ENSOMYG00000073977	protein_coding
atf7b_1	7	62233562..62237996	2.93184	2.16244	4.47672	1.15191e-05	0.00031108	0.424305	ENSOMYG00000027943	ENSOMYG00000027943	protein_coding
cdkn2aip_2	26	42137906..42143463	13.551	2.15957	4.46781	3.72356e-08	2.78033e-06	0.00137157	ENSOMYG00000038531	ENSOMYG00000038531	protein_coding
hoxd3a_2	22	complement(44917475..44923495)	4.948	2.15783	4.46242	9.27676e-07	4.07953e-05	0.0341709	ENSOMYG00000049485	ENSOMYG00000049485	protein_coding
and3_1	10	complement(43088834..43094516)	26.7196	2.15609	4.45706	6.73997e-06	0.000202613	0.248267	ENSOMYG00000023949	ENSOMYG00000023949	protein_coding
VPS37B_1	6	37361440..37380345	3.01802	2.15397	4.45051	7.88649e-05	0.00143545	1	ENSOMYG00000016415	ENSOMYG00000016415	protein_coding
CREBRF_2	12	complement(54309524..54324441)	1.97966	2.15366	4.44955	6.56395e-06	0.000198493	0.241783	ENSOMYG00000016119	ENSOMYG00000016119	protein_coding
rab20_1	3	complement(69595826..69614335)	4.72439	2.14936	4.4363	8.01419e-07	3.61804e-05	0.0295203	ENSOMYG00000015143	ENSOMYG00000015143	protein_coding
gene:ENSOMYG00000032878	2	complement(77896048..77915949)	4.128	2.14925	4.43598	7.73728e-05	0.00141731	1	ENSOMYG00000032878	ENSOMYG00000032878	protein_coding
fn3krp	12	99182825..99187777	1.75304	2.14736	4.43015	0.00108616	0.0111335	1	ENSOMYG00000004999	ENSOMYG00000004999	protein_coding
gene:ENSOMYG00000073154	13	complement(404024..463997)	10.1991	2.14218	4.41429	1.61923e-08	1.37889e-06	0.000596442	ENSOMYG00000073154	ENSOMYG00000073154	protein_coding
cimip2b_2	Y	complement(26730758..26733635)	4.65202	2.14107	4.41088	2.85624e-06	9.98572e-05	0.10521	ENSOMYG00000045278	ENSOMYG00000045278	protein_coding
mx	17	70727511..70801618	1.93445	2.14084	4.4102	0.00642144	0.0424131	1	ENSOMYG00000038725	ENSOMYG00000038725	protein_coding
MDM1_2	21	complement(4933462..4971162)	0.680954	2.14078	4.41	0.000383734	0.0050183	1	ENSOMYG00000062028	ENSOMYG00000062028	protein_coding
wdr24_2	20	complement(6364402..6370169)	6.15333	2.14013	4.40802	8.75199e-07	3.8688e-05	0.0322379	ENSOMYG00000018447	ENSOMYG00000018447	protein_coding
tmem230b	6	complement(26456755..26457980)	8.91026	2.13729	4.39935	1.35583e-06	5.55017e-05	0.0499418	ENSOMYG00000036360	ENSOMYG00000036360	protein_coding
si:ch211-140b10.6	11	complement(15492151..15497076)	5.60439	2.13567	4.39441	0.000146869	0.00235341	1	ENSOMYG00000037205	ENSOMYG00000037205	protein_coding
gene:ENSOMYG00000020063	18	complement(9488273..9499762)	8.23294	2.13525	4.39314	2.4567e-07	1.35984e-05	0.00904925	ENSOMYG00000020063	ENSOMYG00000020063	protein_coding
gene:ENSOMYG00000011941	18	61336907..61446185	3.43571	2.1352	4.39299	8.46711e-06	0.000240613	0.311886	ENSOMYG00000011941	ENSOMYG00000011941	protein_coding
irf1b	12	51063536..51068000	3.85901	2.1343	4.39024	0.000115536	0.00195338	1	ENSOMYG00000038460	ENSOMYG00000038460	protein_coding
gene:ENSOMYG00000021059	15	28200678..28210437	1.85297	2.13387	4.38893	0.00115482	0.0116729	1	ENSOMYG00000021059	ENSOMYG00000021059	protein_coding
gene:ENSOMYG00000013436	11	complement(21398774..21408418)	14.109	2.13375	4.38857	0.000101352	0.00176392	1	ENSOMYG00000013436	ENSOMYG00000013436	protein_coding
serinc1_2	8	20471152..20476699	294.781	2.13239	4.38444	2.37163e-06	8.66375e-05	0.0873589	ENSOMYG00000046045	ENSOMYG00000046045	protein_coding
gene:ENSOMYG00000008680	8	3002849..3018629	0.652997	2.13076	4.37948	0.00206191	0.0181599	1	ENSOMYG00000008680	ENSOMYG00000008680	protein_coding
tmem269_1	9	complement(61688233..61703791)	4.97387	2.13064	4.37913	0.00562867	0.0385987	1	ENSOMYG00000001673	ENSOMYG00000001673	protein_coding
gene:ENSOMYG00000031102	24	complement(9440166..9457073)	1.75699	2.13027	4.378	8.22672e-07	3.69434e-05	0.0303031	ENSOMYG00000031102	ENSOMYG00000031102	protein_coding
UROS_2	23	6376859..6394170	4.32336	2.12591	4.36479	2.69797e-07	1.47416e-05	0.00993799	ENSOMYG00000023375	ENSOMYG00000023375	protein_coding
gene:ENSOMYG00000006149	7	60347257..60354734	56.8707	2.1215	4.35147	1.86722e-07	1.08299e-05	0.00687789	ENSOMYG00000006149	ENSOMYG00000006149	protein_coding
NTN4_3	21	complement(23074193..23092146)	1.21072	2.12089	4.34962	0.000564068	0.00668014	1	ENSOMYG00000016346	ENSOMYG00000016346	protein_coding
rnf24_1	10	57175187..57200978	3.81097	2.11986	4.34651	4.27414e-07	2.14651e-05	0.0157438	ENSOMYG00000006938	ENSOMYG00000006938	protein_coding
gene:ENSOMYG00000010732	16	complement(23712666..23757807)	2.92213	2.11834	4.34194	3.6447e-08	2.72945e-06	0.00134252	ENSOMYG00000010732	ENSOMYG00000010732	protein_coding
gene:ENSOMYG00000026416	26	complement(39087845..39101747)	9.80192	2.11742	4.33916	1.647e-06	6.45416e-05	0.0606671	ENSOMYG00000026416	ENSOMYG00000026416	protein_coding
mindy1_2	32	complement(31858341..31865084)	4.54818	2.11038	4.31805	1.64365e-07	9.7327e-06	0.00605439	ENSOMYG00000018359	ENSOMYG00000018359	protein_coding
gene:ENSOMYG00000016040	12	91880449..91885101	11.7621	2.10864	4.31286	0.000138221	0.00224738	1	ENSOMYG00000016040	ENSOMYG00000016040	protein_coding
atf3	8	23178410..23179706	9.00252	2.1071	4.30824	0.000484723	0.00594633	1	ENSOMYG00000016137	ENSOMYG00000016137	protein_coding
gene:ENSOMYG00000014521	7	complement(77249953..77270479)	1.37046	2.10416	4.29948	0.00381738	0.028885	1	ENSOMYG00000014521	ENSOMYG00000014521	protein_coding
mtf	32	25067278..25083414	2.11779	2.10181	4.29247	7.0414e-07	3.21882e-05	0.025937	ENSOMYG00000005269	ENSOMYG00000005269	protein_coding
gene:ENSOMYG00000014965	21	complement(44871630..44872226)	7.0102	2.10048	4.28852	1.37962e-05	0.000359548	0.508183	ENSOMYG00000014965	ENSOMYG00000014965	protein_coding
dmrt2b_1	5	88172082..88177325	1.85475	2.10015	4.28754	0.000207886	0.00309543	1	ENSOMYG00000029272	ENSOMYG00000029272	protein_coding
gene:ENSOMYG00000048615	6	38858489..38859253	2.37359	2.09669	4.27726	0.00335513	0.0262614	1	ENSOMYG00000048615	ENSOMYG00000048615	protein_coding
gene:ENSOMYG00000044489	18	38817478..38877664	0.272348	2.09637	4.27631	0.00202683	0.0179441	1	ENSOMYG00000044489	ENSOMYG00000044489	protein_coding
RNF111_2	26	complement(27774146..27814065)	9.81217	2.09553	4.27384	3.81125e-07	1.96441e-05	0.0140387	ENSOMYG00000044959	ENSOMYG00000044959	protein_coding
gene:ENSOMYG00000022952	1	complement(19065000..19068901)	1.10692	2.09519	4.27281	0.000575874	0.0067821	1	ENSOMYG00000022952	ENSOMYG00000022952	protein_coding
gene:ENSOMYG00000039647	26	42398994..42459597	0.805284	2.09285	4.26589	0.00687052	0.0446262	1	ENSOMYG00000039647	ENSOMYG00000039647	protein_coding
gdap2_2	22	complement(27129635..27185312)	0.710556	2.09154	4.26204	0.00299477	0.0240773	1	ENSOMYG00000022008	ENSOMYG00000022008	protein_coding
gene:ENSOMYG00000014837	6	31724065..31733295	11.3674	2.09138	4.26156	6.42434e-07	3.00141e-05	0.0236641	ENSOMYG00000014837	ENSOMYG00000014837	protein_coding
gene:ENSOMYG00000048933	Y	complement(11466748..11509609)	3.79339	2.09117	4.26095	6.88267e-06	0.000205447	0.253523	ENSOMYG00000048933	ENSOMYG00000048933	protein_coding
pde7a_2	15	complement(15707950..15734466)	3.4528	2.09078	4.25977	6.91427e-05	0.00129831	1	ENSOMYG00000003923	ENSOMYG00000003923	protein_coding
gene:ENSOMYG00000006320	12	99902393..99919940	4.24659	2.08856	4.25324	0.00413857	0.0306794	1	ENSOMYG00000006320	ENSOMYG00000006320	protein_coding
rab11al_1	2	complement(33003615..33010661)	29.0005	2.08682	4.2481	6.25389e-06	0.000191574	0.230362	ENSOMYG00000000878	ENSOMYG00000000878	protein_coding
cep63	1	complement(3825520..3845841)	15.8925	2.08678	4.24799	5.97667e-08	4.16926e-06	0.00220151	ENSOMYG00000001729	ENSOMYG00000001729	protein_coding
chmp2a_1	16	complement(18622634..18624762)	25.709	2.08668	4.2477	7.12904e-07	3.25304e-05	0.0262598	ENSOMYG00000043771	ENSOMYG00000043771	protein_coding
psmd10	14	31318244..31319863	20.8502	2.08354	4.23845	5.84595e-06	0.000181303	0.215335	ENSOMYG00000019245	ENSOMYG00000019245	protein_coding
gene:ENSOMYG00000029753	5	56585368..56593239	31.6206	2.08227	4.23473	6.45293e-07	3.00924e-05	0.0237694	ENSOMYG00000029753	ENSOMYG00000029753	protein_coding
gene:ENSOMYG00000041250	13	complement(20339234..20354454)	3.72985	2.07985	4.22763	7.25778e-08	4.83764e-06	0.0026734	ENSOMYG00000041250	ENSOMYG00000041250	protein_coding
gene:ENSOMYG00000007614	1	complement(4689839..4703747)	97.6028	2.07797	4.22212	1.93995e-06	7.36139e-05	0.0714579	ENSOMYG00000007614	ENSOMYG00000007614	protein_coding
clk2b	2	complement(18256001..18265273)	68.1533	2.07781	4.22165	8.00995e-06	0.000231497	0.295046	ENSOMYG00000069092	ENSOMYG00000069092	protein_coding
gene:ENSOMYG00000044579	Y	36621473..36635627	1.26381	2.07679	4.21868	0.00102882	0.010736	1	ENSOMYG00000044579	ENSOMYG00000044579	protein_coding
nt5c2b_1	13	15530126..15557701	6.7008	2.07466	4.21244	1.02955e-06	4.42811e-05	0.0379235	ENSOMYG00000029057	ENSOMYG00000029057	protein_coding
zgc:101765	9	6525222..6530022	1.46561	2.07459	4.21226	0.00044713	0.00560552	1	ENSOMYG00000013365	ENSOMYG00000013365	protein_coding
gene:ENSOMYG00000003919	1	complement(17176250..17213381)	13.1854	2.07309	4.20786	1.72965e-07	1.01945e-05	0.00637118	ENSOMYG00000003919	ENSOMYG00000003919	protein_coding
gene:ENSOMYG00000003447	10	complement(63203356..63206918)	1.22601	2.07116	4.20226	0.00245993	0.02074	1	ENSOMYG00000003447	ENSOMYG00000003447	protein_coding
vps51_2	Y	complement(29894098..29900998)	22.4699	2.07084	4.2013	4.0864e-07	2.07267e-05	0.0150522	ENSOMYG00000044245	ENSOMYG00000044245	protein_coding
gene:ENSOMYG00000013456	13	48423406..48425596	3.74174	2.06962	4.19777	0.0010273	0.0107245	1	ENSOMYG00000013456	ENSOMYG00000013456	protein_coding
gene:ENSOMYG00000040243	11	16099082..16200744	9.04406	2.06875	4.19524	3.26394e-06	0.000110661	0.120227	ENSOMYG00000040243	ENSOMYG00000040243	protein_coding
MYH6_3	15	21032377..21046795	112.434	2.06837	4.19411	0.00227137	0.019545	1	ENSOMYG00000010415	ENSOMYG00000010415	protein_coding
jmjd4	28	complement(12746204..12749919)	12.835	2.06791	4.19279	8.46505e-08	5.4984e-06	0.0031181	ENSOMYG00000040746	ENSOMYG00000040746	protein_coding
gene:ENSOMYG00000031038	5	79042684..79058919	3.57737	2.06784	4.19259	2.02983e-06	7.61173e-05	0.0747689	ENSOMYG00000031038	ENSOMYG00000031038	protein_coding
gene:ENSOMYG00000031638	11	78346217..78399435	3.70539	2.0662	4.18783	7.25741e-09	6.97314e-07	0.000267327	ENSOMYG00000031638	ENSOMYG00000031638	protein_coding
gene:ENSOMYG00000029202	15	complement(23401404..23439899)	3.32871	2.06524	4.18504	1.51596e-06	6.0691e-05	0.0558405	ENSOMYG00000029202	ENSOMYG00000029202	protein_coding
BEST3_1	15	complement(66033200..66047467)	13.4773	2.06465	4.18331	3.76892e-07	1.94654e-05	0.0138828	ENSOMYG00000054156	ENSOMYG00000054156	protein_coding
pip4p2	18	70499029..70546234	7.90474	2.06373	4.18066	2.1291e-07	1.20469e-05	0.00784254	ENSOMYG00000070808	ENSOMYG00000070808	protein_coding
vcam1b_1	1	complement(15292366..15306926)	2.7911	2.06282	4.17802	1.09347e-07	6.77419e-06	0.0040278	ENSOMYG00000009092	ENSOMYG00000009092	protein_coding
cgrrf1_1	4	34455173..34458853	7.67794	2.0617	4.17477	2.44672e-06	8.89978e-05	0.0901251	ENSOMYG00000008433	ENSOMYG00000008433	protein_coding
gene:ENSOMYG00000059393	17	complement(13286945..13300453)	2.08014	2.06165	4.17463	4.73457e-06	0.00015202	0.174398	ENSOMYG00000059393	ENSOMYG00000059393	protein_coding
gene:ENSOMYG00000006867	9	25411220..25418122	90.1662	2.06159	4.17445	1.48369e-06	5.99647e-05	0.0546518	ENSOMYG00000006867	ENSOMYG00000006867	protein_coding
znf395a_1	19	complement(52838737..52849429)	7.80788	2.06084	4.1723	1.58724e-06	6.27553e-05	0.0584662	ENSOMYG00000022552	ENSOMYG00000022552	protein_coding
cpt1	1	complement(34647729..34658313)	13.2924	2.06038	4.17095	2.37698e-07	1.32435e-05	0.00875561	ENSOMYG00000014061	ENSOMYG00000014061	protein_coding
gene:ENSOMYG00000012390	23	15912158..15915947	0.918474	2.06034	4.17083	0.0037016	0.028195	1	ENSOMYG00000012390	ENSOMYG00000012390	protein_coding
ftr67	28	42584300..42599361	28.6363	2.05825	4.16481	3.5988e-07	1.87388e-05	0.0132562	ENSOMYG00000024905	ENSOMYG00000024905	protein_coding
gene:ENSOMYG00000029210	25	5402481..5403584	3.71987	2.05754	4.16277	3.99557e-05	0.00085134	1	ENSOMYG00000029210	ENSOMYG00000029210	protein_coding
gene:ENSOMYG00000008891	2	89168227..89202655	1.41798	2.05655	4.15991	2.51583e-06	9.04774e-05	0.0926705	ENSOMYG00000008891	ENSOMYG00000008891	protein_coding
tusc2b_2	17	complement(48608636..48612879)	87.46	2.05655	4.1599	6.36598e-07	2.99613e-05	0.0234491	ENSOMYG00000013847	ENSOMYG00000013847	protein_coding
gene:ENSOMYG00000022971	16	complement(20959041..20968201)	0.710923	2.055	4.15545	0.00271186	0.0223694	1	ENSOMYG00000022971	ENSOMYG00000022971	protein_coding
gene:ENSOMYG00000029782	17	21977760..21984371	8.57623	2.05427	4.15333	1.50695e-05	0.000385929	0.555085	ENSOMYG00000029782	ENSOMYG00000029782	protein_coding
hacl1_2	3	complement(1571848..1581517)	11.1951	2.05395	4.15241	6.02336e-06	0.00018545	0.221871	ENSOMYG00000029201	ENSOMYG00000029201	protein_coding
rex1bd	30	complement(17825920..17845152)	4.98594	2.05323	4.15034	6.75526e-08	4.62372e-06	0.0024883	ENSOMYG00000076969	ENSOMYG00000076969	protein_coding
vps4a_2	2	66508536..66529563	25.3621	2.05307	4.14987	2.20116e-06	8.16997e-05	0.0810798	ENSOMYG00000013414	ENSOMYG00000013414	protein_coding
FAM118B_1	24	complement(23330773..23340191)	42.1604	2.05253	4.14831	4.01951e-07	2.05512e-05	0.0148059	ENSOMYG00000040059	ENSOMYG00000040059	protein_coding
gene:ENSOMYG00000009455	9	complement(27119076..27196096)	0.82743	2.0514	4.14507	0.000409664	0.00527878	1	ENSOMYG00000009455	ENSOMYG00000009455	protein_coding
eif4ebp3l_2	31	14230257..14234003	173.784	2.04661	4.13133	1.35826e-07	8.21472e-06	0.00500314	ENSOMYG00000019823	ENSOMYG00000019823	protein_coding
gene:ENSOMYG00000043955	7	71034849..71077073	10.2896	2.04389	4.12355	3.09162e-05	0.000693349	1	ENSOMYG00000043955	ENSOMYG00000043955	protein_coding
herc3_1	10	complement(69174519..69207760)	3.45428	2.043	4.12102	1.54052e-07	9.18612e-06	0.00567451	ENSOMYG00000005644	ENSOMYG00000005644	protein_coding
gene:ENSOMYG00000026140	2	10185746..10296122	0.540603	2.04233	4.11911	0.000626846	0.00723188	1	ENSOMYG00000026140	ENSOMYG00000026140	protein_coding
kpna3_1	7	13553246..13564541	26.681	2.04144	4.11655	2.85302e-07	1.55554e-05	0.0105091	ENSOMYG00000007038	ENSOMYG00000007038	protein_coding
ZBTB44_2	27	15386786..15402267	1.37701	2.03985	4.11201	0.000304814	0.00419976	1	ENSOMYG00000047035	ENSOMYG00000047035	protein_coding
gene:ENSOMYG00000047036	31	complement(30615338..30623387)	24.4718	2.03655	4.10263	2.44722e-07	1.35897e-05	0.00901434	ENSOMYG00000047036	ENSOMYG00000047036	protein_coding
gene:ENSOMYG00000003028	8	83876405..83881857	2.07351	2.03521	4.09881	7.56861e-05	0.00139142	1	ENSOMYG00000003028	ENSOMYG00000003028	protein_coding
gene:ENSOMYG00000016937	19	complement(58309954..58313938)	1.71954	2.03252	4.09118	0.00195619	0.0174094	1	ENSOMYG00000016937	ENSOMYG00000016937	protein_coding
pax3b_1	24	27292100..27331943	0.632043	2.03126	4.08761	0.00308658	0.0246399	1	ENSOMYG00000043216	ENSOMYG00000043216	protein_coding
gene:ENSOMYG00000012650	17	complement(48354172..48369419)	5.64632	2.02901	4.08124	4.5704e-05	0.000945342	1	ENSOMYG00000012650	ENSOMYG00000012650	protein_coding
gene:ENSOMYG00000073774	7	7467644..7470958	0.984619	2.02616	4.07319	0.00110297	0.0112561	1	ENSOMYG00000073774	ENSOMYG00000073774	protein_coding
neil3	14	17407182..17413236	2.04104	2.0238	4.06652	3.29164e-05	0.000728164	1	ENSOMYG00000012187	ENSOMYG00000012187	protein_coding
gene:ENSOMYG00000047813	28	complement(27513097..27517222)	7.23051	2.02256	4.06304	8.15338e-08	5.3095e-06	0.0030033	ENSOMYG00000047813	ENSOMYG00000047813	protein_coding
gene:ENSOMYG00000006903	9	12993083..13001679	2.21579	2.02184	4.06101	0.000385042	0.00503266	1	ENSOMYG00000006903	ENSOMYG00000006903	protein_coding
MXI1_2	13	12114588..12156102	1.75605	2.02135	4.05963	0.00126353	0.0124698	1	ENSOMYG00000009730	ENSOMYG00000009730	protein_coding
ccdc6a_1	1	complement(77126847..77142486)	19.3421	2.01902	4.05309	1.65981e-06	6.47198e-05	0.0611391	ENSOMYG00000025067	ENSOMYG00000025067	protein_coding
rnft1_1	10	complement(31155436..31159534)	2.04992	2.01851	4.05166	0.000310102	0.00424951	1	ENSOMYG00000021054	ENSOMYG00000021054	protein_coding
gene:ENSOMYG00000041697	21	complement(39035091..39036512)	0.901568	2.01549	4.04318	0.0062205	0.0414295	1	ENSOMYG00000041697	ENSOMYG00000041697	protein_coding
gene:ENSOMYG00000020918	31	16605114..16617431	8.19064	2.01346	4.03749	7.14082e-08	4.78472e-06	0.00263032	ENSOMYG00000020918	ENSOMYG00000020918	protein_coding
cpt1b	2	complement(76399940..76608043)	63.5451	2.01328	4.037	2.12633e-06	7.90517e-05	0.0783235	ENSOMYG00000030614	ENSOMYG00000030614	protein_coding
stk11ip_1	7	12213616..12256100	11.2721	2.01167	4.03248	0.000109455	0.00187043	1	ENSOMYG00000003679	ENSOMYG00000003679	protein_coding
gene:ENSOMYG00000048380	9	complement(73072093..73117719)	41.1816	2.01013	4.0282	1.08166e-05	0.000295879	0.39843	ENSOMYG00000048380	ENSOMYG00000048380	protein_coding
FBXO21_2	11	74237518..74250658	4.87077	2.00843	4.02344	4.73717e-07	2.31512e-05	0.0174494	ENSOMYG00000011810	ENSOMYG00000011810	protein_coding
usp25_1	10	complement(33258905..33318043)	70.8841	2.00737	4.02049	1.5146e-05	0.000387196	0.557902	ENSOMYG00000024893	ENSOMYG00000024893	protein_coding
sys1	7	65326359..65328342	6.76061	2.0068	4.0189	1.45752e-05	0.000374863	0.536879	ENSOMYG00000049076	ENSOMYG00000049076	protein_coding
gene:ENSOMYG00000023034	19	complement(25829064..25869638)	4.02496	2.00608	4.01688	4.68231e-06	0.000150532	0.172473	ENSOMYG00000023034	ENSOMYG00000023034	protein_coding
gene:ENSOMYG00000063814	32	5727541..5749980	13.8164	2.00571	4.01587	5.48893e-08	3.90558e-06	0.00202185	ENSOMYG00000063814	ENSOMYG00000063814	protein_coding
gene:ENSOMYG00000034616	13	complement(57707796..57727054)	0.407236	2.00543	4.01508	0.00343576	0.0267027	1	ENSOMYG00000034616	ENSOMYG00000034616	protein_coding
ATP6V1A_1	11	15826634..15838948	5.33409	2.00362	4.01004	0.000929034	0.00988511	1	ENSOMYG00000040082	ENSOMYG00000040082	protein_coding
gene:ENSOMYG00000045663	8	complement(50666184..50674468)	2.64615	2.00309	4.00857	0.000258636	0.00367079	1	ENSOMYG00000045663	ENSOMYG00000045663	protein_coding
gene:ENSOMYG00000056696	Y	29291857..29299968	1.04735	2.00302	4.00837	1.98613e-05	0.000481836	0.731592	ENSOMYG00000056696	ENSOMYG00000056696	protein_coding
gene:ENSOMYG00000036239	13	complement(68131956..68147761)	21.627	2.00155	4.0043	3.30124e-05	0.00072902	1	ENSOMYG00000036239	ENSOMYG00000036239	protein_coding
gene:ENSOMYG00000021953	31	complement(32922273..32930570)	1.91768	1.99808	3.99468	0.00123573	0.0122572	1	ENSOMYG00000021953	ENSOMYG00000021953	protein_coding
gene:ENSOMYG00000063667	10	complement(2199950..2217758)	3.14834	1.99417	3.98386	0.000427784	0.00541633	1	ENSOMYG00000063667	ENSOMYG00000063667	protein_coding
FBXL5_1	5	complement(73558379..73574689)	14.9461	1.99376	3.98273	9.50558e-08	6.05078e-06	0.00350138	ENSOMYG00000001417	ENSOMYG00000001417	protein_coding
gene:ENSOMYG00000014544	19	61700864..61706158	2.95062	1.99303	3.98073	1.12249e-06	4.77943e-05	0.0413471	ENSOMYG00000014544	ENSOMYG00000014544	protein_coding
MARCHF7_1	7	21038215..21095444	51.7804	1.99178	3.97729	7.98211e-05	0.00145068	1	ENSOMYG00000014938	ENSOMYG00000014938	protein_coding
STYXL2_1	7	5689094..5699328	106.987	1.9896	3.97128	9.50137e-06	0.000266143	0.349983	ENSOMYG00000051365	ENSOMYG00000051365	protein_coding
gene:ENSOMYG00000035625	2	40881242..40884648	3.1136	1.989	3.96962	4.02477e-05	0.000855415	1	ENSOMYG00000035625	ENSOMYG00000035625	protein_coding
slc44a5b_2	5	complement(54719213..54770137)	8.15797	1.98705	3.96425	2.86918e-08	2.21379e-06	0.00105686	ENSOMYG00000020116	ENSOMYG00000020116	protein_coding
gene:ENSOMYG00000002035	1	19903859..19906205	6.42478	1.98688	3.96379	9.57838e-06	0.000267711	0.35282	ENSOMYG00000002035	ENSOMYG00000002035	protein_coding
gene:ENSOMYG00000043432	27	23410832..23493540	2.51509	1.98618	3.96187	2.50186e-06	9.01023e-05	0.092156	ENSOMYG00000043432	ENSOMYG00000043432	protein_coding
LSM11_1	14	complement(30792211..30794312)	4.90739	1.98614	3.96176	2.94621e-05	0.000668	1	ENSOMYG00000015096	ENSOMYG00000015096	protein_coding
wipi1_1	12	98021566..98059077	4.35592	1.98502	3.95869	3.04086e-06	0.000104772	0.11201	ENSOMYG00000076911	ENSOMYG00000076911	protein_coding
dhx58_1	12	complement(70280799..70308105)	4.58439	1.98457	3.95746	0.00439781	0.0321588	1	ENSOMYG00000008998	ENSOMYG00000008998	protein_coding
ZFYVE21	25	complement(23346040..23353884)	10.6754	1.98435	3.95686	1.79756e-06	6.90339e-05	0.0662131	ENSOMYG00000031706	ENSOMYG00000031706	protein_coding
CPZ	9	complement(25208253..25262109)	0.594003	1.98302	3.95321	0.000926998	0.0098717	1	ENSOMYG00000006017	ENSOMYG00000006017	protein_coding
snx9a	25	40708606..40742041	3.39586	1.98198	3.95035	4.21142e-07	2.12339e-05	0.0155128	ENSOMYG00000073053	ENSOMYG00000073053	protein_coding
si:ch1073-126c3.2	23	29993886..29995797	2.15584	1.98165	3.94943	0.0014727	0.0140547	1	ENSOMYG00000045408	ENSOMYG00000045408	protein_coding
tmem120aa	10	complement(26044342..26092875)	24.3716	1.98161	3.94932	7.81297e-08	5.11398e-06	0.00287791	ENSOMYG00000013125	ENSOMYG00000013125	protein_coding
gene:ENSOMYG00000001120	1	complement(4963267..4987859)	16.2917	1.98156	3.9492	1.13814e-06	4.82987e-05	0.0419232	ENSOMYG00000001120	ENSOMYG00000001120	protein_coding
gene:ENSOMYG00000045617	13	complement(25470977..25475906)	2.20023	1.97945	3.94342	4.1312e-05	0.000874722	1	ENSOMYG00000045617	ENSOMYG00000045617	protein_coding
slc2a8_1	6	complement(20927790..20940048)	1.87425	1.97752	3.93815	0.000572375	0.00675026	1	ENSOMYG00000006574	ENSOMYG00000006574	protein_coding
gene:ENSOMYG00000005005	32	11193287..11234475	0.701533	1.97608	3.93422	0.00400983	0.029976	1	ENSOMYG00000005005	ENSOMYG00000005005	protein_coding
gene:ENSOMYG00000057976	3	complement(3025074..3079249)	1.59976	1.97346	3.92709	0.000163107	0.0025471	1	ENSOMYG00000057976	ENSOMYG00000057976	protein_coding
TRIM55	28	23204966..23212205	129.643	1.97339	3.92691	8.17363e-06	0.000234378	0.301076	ENSOMYG00000034534	ENSOMYG00000034534	protein_coding
nr2f6a_1	8	53746100..53763834	3.82023	1.97263	3.92484	1.4283e-05	0.000368837	0.526113	ENSOMYG00000069646	ENSOMYG00000069646	protein_coding
ubfd1_1	12	complement(72299960..72303652)	94.9703	1.97235	3.92408	8.60943e-05	0.00154702	1	ENSOMYG00000015390	ENSOMYG00000015390	protein_coding
pja2	5	complement(42614807..42628149)	8.57835	1.97183	3.92267	1.40209e-06	5.72117e-05	0.0516461	ENSOMYG00000020487	ENSOMYG00000020487	protein_coding
gene:ENSOMYG00000022258	17	32974379..32984918	4.19415	1.97167	3.92223	2.46623e-06	8.93244e-05	0.0908434	ENSOMYG00000022258	ENSOMYG00000022258	protein_coding
max	8	complement(7341130..7369397)	9.55112	1.9707	3.91958	5.92405e-08	4.14456e-06	0.00218212	ENSOMYG00000004167	ENSOMYG00000004167	protein_coding
GRAMD4_2	15	complement(47492743..47558683)	17.1903	1.96838	3.91329	7.67464e-06	0.000223583	0.282695	ENSOMYG00000028711	ENSOMYG00000028711	protein_coding
gene:ENSOMYG00000019640	8	complement(25312014..25320165)	11.1884	1.96698	3.90949	1.19457e-06	5.01918e-05	0.0440021	ENSOMYG00000019640	ENSOMYG00000019640	protein_coding
gene:ENSOMYG00000058650	7	complement(8240741..8253436)	4.83205	1.96465	3.90318	2.25732e-06	8.30576e-05	0.0831484	ENSOMYG00000058650	ENSOMYG00000058650	protein_coding
slc66a1_1	9	complement(52319194..52322071)	11.848	1.96448	3.90271	1.20488e-06	5.05413e-05	0.0443816	ENSOMYG00000031731	ENSOMYG00000031731	protein_coding
gpcpd1_1	4	complement(28502734..28523093)	25.4072	1.96423	3.90206	1.65533e-06	6.46442e-05	0.0609741	ENSOMYG00000030585	ENSOMYG00000030585	protein_coding
gene:ENSOMYG00000021364	14	32815475..32825741	0.884176	1.96367	3.90052	0.00596499	0.0401441	1	ENSOMYG00000021364	ENSOMYG00000021364	protein_coding
gene:ENSOMYG00000044725	31	34960683..34964953	1.95129	1.96321	3.89928	0.00354188	0.0273531	1	ENSOMYG00000044725	ENSOMYG00000044725	protein_coding
gene:ENSOMYG00000065150	13	9006798..9026822	1.13666	1.96296	3.89861	0.000107693	0.00184548	1	ENSOMYG00000065150	ENSOMYG00000065150	protein_coding
gene:ENSOMYG00000026718	10	63093462..63103729	1.00937	1.9626	3.89763	0.00620192	0.0413673	1	ENSOMYG00000026718	ENSOMYG00000026718	protein_coding
gene:ENSOMYG00000003795	2	35204630..35236830	3.12724	1.96124	3.89396	5.25527e-06	0.000166637	0.193578	ENSOMYG00000003795	ENSOMYG00000003795	protein_coding
gene:ENSOMYG00000067456	17	complement(14276545..14289746)	1.89615	1.95649	3.88116	5.09152e-06	0.000162456	0.187546	ENSOMYG00000067456	ENSOMYG00000067456	protein_coding
gene:ENSOMYG00000000385	3	complement(78172915..78191496)	1.08971	1.95592	3.87964	0.000813211	0.00888287	1	ENSOMYG00000000385	ENSOMYG00000000385	protein_coding
gene:ENSOMYG00000074639	10	complement(39006324..39014603)	1.08682	1.95454	3.87592	0.000416804	0.00533836	1	ENSOMYG00000074639	ENSOMYG00000074639	protein_coding
chmp2bb_2	18	complement(430747..438948)	1.97408	1.95386	3.87411	0.00263841	0.0218896	1	ENSOMYG00000071515	ENSOMYG00000071515	protein_coding
snx16	11	complement(24778557..24792371)	1.72724	1.9532	3.87232	0.000330784	0.0044669	1	ENSOMYG00000031984	ENSOMYG00000031984	protein_coding
gene:ENSOMYG00000001780	4	8884845..8896462	1.58256	1.9506	3.86536	0.000110295	0.00188106	1	ENSOMYG00000001780	ENSOMYG00000001780	protein_coding
tube1	4	14486544..14496971	4.10683	1.95021	3.86431	2.05072e-05	0.00049377	0.755385	ENSOMYG00000008799	ENSOMYG00000008799	protein_coding
gene:ENSOMYG00000039054	9	39531780..39541197	6.3677	1.94886	3.86068	7.47747e-07	3.38775e-05	0.0275433	ENSOMYG00000039054	ENSOMYG00000039054	protein_coding
gene:ENSOMYG00000020066	8	74228253..74230124	0.836476	1.94867	3.8602	0.00694799	0.0449466	1	ENSOMYG00000020066	ENSOMYG00000020066	protein_coding
add3b_2	23	24712687..24730659	0.559689	1.94863	3.86008	0.00716664	0.0460042	1	ENSOMYG00000041276	ENSOMYG00000041276	protein_coding
ubfd1_2	13	complement(39281979..39287749)	91.1664	1.9476	3.85731	1.22769e-05	0.0003263	0.452221	ENSOMYG00000016909	ENSOMYG00000016909	protein_coding
lonp2	2	complement(68951325..68977565)	22.5988	1.94751	3.85709	5.87359e-06	0.000181938	0.216354	ENSOMYG00000017458	ENSOMYG00000017458	protein_coding
gene:ENSOMYG00000044811	31	35683023..35737543	1.26216	1.94646	3.85427	0.00100728	0.0105457	1	ENSOMYG00000044811	ENSOMYG00000044811	protein_coding
gene:ENSOMYG00000012474	15	16121324..16124304	4.57723	1.94632	3.85391	6.54979e-05	0.00125203	1	ENSOMYG00000012474	ENSOMYG00000012474	protein_coding
yju2b_2	17	18728772..18734768	3.73903	1.94581	3.85253	3.14974e-06	0.000107665	0.116021	ENSOMYG00000057999	ENSOMYG00000057999	protein_coding
kpna3_2	18	16454294..16466522	28.1534	1.94512	3.8507	1.23408e-06	5.14274e-05	0.0454574	ENSOMYG00000018683	ENSOMYG00000018683	protein_coding
exoc8_1	4	17936153..17938222	7.77755	1.94421	3.84827	3.18205e-07	1.69617e-05	0.0117211	ENSOMYG00000017827	ENSOMYG00000017827	protein_coding
ercc2_1	24	10585109..10592690	0.932388	1.94315	3.84545	0.00754912	0.0476472	1	ENSOMYG00000037685	ENSOMYG00000037685	protein_coding
gene:ENSOMYG00000011447	2	complement(31577705..31590319)	100.456	1.94303	3.84513	9.49303e-06	0.000266143	0.349676	ENSOMYG00000011447	ENSOMYG00000011447	protein_coding
gene:ENSOMYG00000000315	1	31645011..31661363	9.7334	1.94236	3.84333	1.69683e-05	0.000426331	0.625026	ENSOMYG00000000315	ENSOMYG00000000315	protein_coding
CAPN7_2	3	22557418..22574586	2.74832	1.94095	3.83958	6.84135e-06	0.000204694	0.252001	ENSOMYG00000003911	ENSOMYG00000003911	protein_coding
slc6a9_2	28	21295630..21345294	5.96053	1.93842	3.83287	2.53144e-06	9.07825e-05	0.0932457	ENSOMYG00000054672	ENSOMYG00000054672	protein_coding
gene:ENSOMYG00000040232	30	11070184..11120270	6.87024	1.93735	3.83	2.46554e-06	8.93244e-05	0.0908183	ENSOMYG00000040232	ENSOMYG00000040232	protein_coding
socs3b_2	23	complement(39949835..39955890)	6.22874	1.93564	3.82548	3.15021e-06	0.000107665	0.116038	ENSOMYG00000045998	ENSOMYG00000045998	protein_coding
gene:ENSOMYG00000027262	3	13039330..13073717	2.45555	1.9355	3.8251	1.91677e-06	7.29518e-05	0.0706042	ENSOMYG00000027262	ENSOMYG00000027262	protein_coding
gene:ENSOMYG00000015697	21	53268966..53327960	37.5689	1.93513	3.82413	2.52245e-05	0.000588155	0.929143	ENSOMYG00000015697	ENSOMYG00000015697	protein_coding
WHAMM_2	26	6099642..6127173	23.2716	1.93445	3.82232	1.15128e-06	4.8694e-05	0.0424073	ENSOMYG00000067414	ENSOMYG00000067414	protein_coding
gene:ENSOMYG00000003261	11	83990625..84043562	6.81187	1.93439	3.82215	9.03355e-07	3.98635e-05	0.0332751	ENSOMYG00000003261	ENSOMYG00000003261	protein_coding
dgcr6	11	complement(52640176..52643058)	5.74946	1.93437	3.82211	2.04295e-05	0.000492591	0.752521	ENSOMYG00000005895	ENSOMYG00000005895	protein_coding
gene:ENSOMYG00000000274	1	complement(31614860..31637865)	33.1618	1.93434	3.82203	9.87986e-06	0.00027493	0.363925	ENSOMYG00000000274	ENSOMYG00000000274	protein_coding
irf2	31	complement(18658241..18669850)	1.18408	1.93388	3.82081	0.000700197	0.00787126	1	ENSOMYG00000042654	ENSOMYG00000042654	protein_coding
kmt5aa_1	5	complement(41511572..41521308)	19.9371	1.93355	3.81995	1.03052e-05	0.00028459	0.379593	ENSOMYG00000003262	ENSOMYG00000003262	protein_coding
gene:ENSOMYG00000029120	18	18792526..18799441	2.01862	1.93336	3.81945	0.000994434	0.0104543	1	ENSOMYG00000029120	ENSOMYG00000029120	protein_coding
tnksb	11	complement(63320037..63347972)	19.6763	1.93302	3.81854	1.35179e-06	5.54258e-05	0.0497934	ENSOMYG00000015683	ENSOMYG00000015683	protein_coding
vps41_1	11	complement(36290896..36323314)	18.9417	1.93187	3.8155	6.41067e-07	3.00141e-05	0.0236137	ENSOMYG00000038046	ENSOMYG00000038046	protein_coding
si:dkey-26c10.5_2	3	complement(11359010..11364637)	23.1557	1.93187	3.81548	8.27022e-07	3.70733e-05	0.0304634	ENSOMYG00000027718	ENSOMYG00000027718	protein_coding
herc3_2	19	9964468..9997178	2.17344	1.93167	3.81498	5.91326e-07	2.81954e-05	0.0217815	ENSOMYG00000039165	ENSOMYG00000039165	protein_coding
asb16_1	12	complement(82835752..82838072)	47.3585	1.93122	3.81378	8.64785e-06	0.000244386	0.318544	ENSOMYG00000008866	ENSOMYG00000008866	protein_coding
fbxo8_2	19	complement(13368432..13377975)	5.38711	1.93044	3.81172	6.27923e-07	2.96627e-05	0.0231295	ENSOMYG00000017247	ENSOMYG00000017247	protein_coding
PDE3B_1	6	complement(73637294..73724968)	2.12527	1.92991	3.8103	1.30324e-06	5.37816e-05	0.048005	ENSOMYG00000028505	ENSOMYG00000028505	protein_coding
eif2b2_2	8	complement(4582563..4590435)	32.8124	1.92929	3.80868	2.89499e-07	1.57505e-05	0.0106637	ENSOMYG00000002165	ENSOMYG00000002165	protein_coding
gene:ENSOMYG00000046154	28	complement(29229698..29239104)	0.960569	1.92622	3.80059	0.00263546	0.0218794	1	ENSOMYG00000046154	ENSOMYG00000046154	protein_coding
ZC3H3_1	5	complement(82981682..83096927)	10.1554	1.92618	3.80048	3.65469e-05	0.000793314	1	ENSOMYG00000037319	ENSOMYG00000037319	protein_coding
DYNC2I1	15	31290013..31305764	5.3943	1.92504	3.79748	7.42484e-08	4.92321e-06	0.00273494	ENSOMYG00000028511	ENSOMYG00000028511	protein_coding
gene:ENSOMYG00000011475	13	complement(12900622..12904950)	12.3083	1.92382	3.79427	3.50692e-07	1.8411e-05	0.0129177	ENSOMYG00000011475	ENSOMYG00000011475	protein_coding
vps9d1_2	2	66586670..66609588	3.51351	1.92352	3.79347	2.57712e-06	9.19027e-05	0.0949281	ENSOMYG00000013681	ENSOMYG00000013681	protein_coding
gpr146_1	12	72989015..72990022	3.62355	1.92297	3.79202	0.00031026	0.00424951	1	ENSOMYG00000004833	ENSOMYG00000004833	protein_coding
gs02	8	complement(66798543..66801779)	12.358	1.922	3.78947	9.77551e-06	0.000272582	0.360081	ENSOMYG00000030099	ENSOMYG00000030099	protein_coding
znf704_2	32	11664538..11742179	1.07551	1.91978	3.78365	0.000563031	0.00667096	1	ENSOMYG00000004135	ENSOMYG00000004135	protein_coding
crot_2	3	6660052..6711066	10.4198	1.91871	3.78086	6.30151e-06	0.000191743	0.232116	ENSOMYG00000025699	ENSOMYG00000025699	protein_coding
zgc:92907_2	31	complement(30643601..30645531)	11.6997	1.91811	3.77927	2.01608e-07	1.15877e-05	0.00742622	ENSOMYG00000047044	ENSOMYG00000047044	protein_coding
gene:ENSOMYG00000022347	21	11341498..11354349	7.57085	1.91658	3.77526	1.365e-05	0.000356834	0.502798	ENSOMYG00000022347	ENSOMYG00000022347	protein_coding
ifm3	13	25101524..25102652	21.1208	1.91652	3.77511	0.000212089	0.00314331	1	ENSOMYG00000064316	ENSOMYG00000064316	protein_coding
gene:ENSOMYG00000001618	8	complement(75567801..75570452)	12.155	1.91595	3.77364	1.1939e-05	0.000318649	0.439774	ENSOMYG00000001618	ENSOMYG00000001618	protein_coding
gene:ENSOMYG00000046065	Y	34703315..34713363	7.26327	1.91569	3.77294	1.05978e-06	4.53514e-05	0.0390369	ENSOMYG00000046065	ENSOMYG00000046065	protein_coding
gene:ENSOMYG00000070542	2	complement(35674275..35700896)	0.660592	1.91505	3.77128	0.0071817	0.0460258	1	ENSOMYG00000070542	ENSOMYG00000070542	protein_coding
gene:ENSOMYG00000043464	20	complement(33972125..33983851)	5.32849	1.91505	3.77127	8.27088e-06	0.000236673	0.304658	ENSOMYG00000043464	ENSOMYG00000043464	protein_coding
bnip3_3	23	9161759..9172867	86.3569	1.91284	3.76549	3.77648e-05	0.000815413	1	ENSOMYG00000000560	ENSOMYG00000000560	protein_coding
otud5a	16	66658772..66683350	33.7482	1.91279	3.76537	3.64727e-06	0.000121873	0.134347	ENSOMYG00000038621	ENSOMYG00000038621	protein_coding
gene:ENSOMYG00000000848	1	complement(72326851..72355580)	55.0367	1.91232	3.76413	6.11489e-05	0.00118762	1	ENSOMYG00000000848	ENSOMYG00000000848	protein_coding
NSMAF	15	complement(24843968..24858077)	4.90158	1.91004	3.75821	2.98129e-07	1.60825e-05	0.0109816	ENSOMYG00000008543	ENSOMYG00000008543	protein_coding
psmd11b_2	20	20308178..20313524	72.9945	1.90872	3.75475	0.000164746	0.00256561	1	ENSOMYG00000026111	ENSOMYG00000026111	protein_coding
trappc13_1	5	complement(24645530..24661443)	18.2219	1.90863	3.75452	2.07939e-06	7.75188e-05	0.0765942	ENSOMYG00000013653	ENSOMYG00000013653	protein_coding
gene:ENSOMYG00000031544	6	2002472..2104667	1.12207	1.90776	3.75226	0.00419704	0.0309575	1	ENSOMYG00000031544	ENSOMYG00000031544	protein_coding
epg5	6	complement(32049246..32071302)	8.32208	1.90605	3.74781	1.5354e-06	6.13725e-05	0.0565563	ENSOMYG00000029318	ENSOMYG00000029318	protein_coding
gene:ENSOMYG00000009788	9	27214204..27220269	5.46574	1.90548	3.74632	6.20556e-05	0.00119792	1	ENSOMYG00000009788	ENSOMYG00000009788	protein_coding
gene:ENSOMYG00000015495	15	17536894..17644771	1.85153	1.90389	3.74222	1.80788e-05	0.000446048	0.665932	ENSOMYG00000015495	ENSOMYG00000015495	protein_coding
gene:ENSOMYG00000014447	3	67419348..67427562	0.952419	1.9024	3.73835	0.000289609	0.00402512	1	ENSOMYG00000014447	ENSOMYG00000014447	protein_coding
gene:ENSOMYG00000062564	23	complement(42663757..42671298)	3.84571	1.90203	3.73738	4.11243e-05	0.000872589	1	ENSOMYG00000062564	ENSOMYG00000062564	protein_coding
gene:ENSOMYG00000040666	17	complement(25804628..25806281)	5.1628	1.90022	3.73271	0.00153578	0.0145194	1	ENSOMYG00000040666	ENSOMYG00000040666	protein_coding
SLC30A8_1	18	36147935..36159076	0.695787	1.90002	3.73218	0.00461228	0.0332497	1	ENSOMYG00000034219	ENSOMYG00000034219	protein_coding
GBP	2	complement(30558367..30558849)	81.0045	1.89876	3.72892	0.000122343	0.00204672	1	ENSOMYG00000057057	ENSOMYG00000057057	protein_coding
glcci1a_2	32	complement(23923866..23957557)	4.66592	1.89843	3.72809	3.34752e-07	1.76835e-05	0.0123306	ENSOMYG00000064586	ENSOMYG00000064586	protein_coding
si:dkey-10f21.4_1	8	complement(56374643..56386556)	22.2442	1.89791	3.72674	1.34761e-06	5.53434e-05	0.0496393	ENSOMYG00000016977	ENSOMYG00000016977	protein_coding
bnip3_1	1	74219056..74226753	22.7316	1.89774	3.7263	2.12179e-07	1.20346e-05	0.0078156	ENSOMYG00000019362	ENSOMYG00000019362	protein_coding
gene:ENSOMYG00000015969	13	54457934..54470148	8.09663	1.89765	3.72605	9.79568e-05	0.00171894	1	ENSOMYG00000015969	ENSOMYG00000015969	protein_coding
zgc:123305_2	17	46302548..46343956	6.54505	1.89602	3.72184	6.25069e-07	2.95827e-05	0.0230244	ENSOMYG00000045781	ENSOMYG00000045781	protein_coding
meox2b_1	18	complement(50997927..51012671)	45.4537	1.89591	3.72156	4.06721e-05	0.000863715	1	ENSOMYG00000016021	ENSOMYG00000016021	protein_coding
mepcea_1	10	45446189..45449031	3.35614	1.89547	3.72044	3.79198e-06	0.000125718	0.139678	ENSOMYG00000013577	ENSOMYG00000013577	protein_coding
calcoco1a_2	16	complement(41386186..41393784)	58.1135	1.89518	3.71969	7.75395e-06	0.000225121	0.285617	ENSOMYG00000026871	ENSOMYG00000026871	protein_coding
gene:ENSOMYG00000002546	2	99783473..99818076	0.907239	1.89485	3.71883	0.00416524	0.0308121	1	ENSOMYG00000002546	ENSOMYG00000002546	protein_coding
phaf1_2	2	complement(69334410..69341110)	4.09552	1.89375	3.716	6.19859e-05	0.00119749	1	ENSOMYG00000000440	ENSOMYG00000000440	protein_coding
si:dkeyp-69e1.8_1	12	complement(78020483..78021602)	8.65858	1.8926	3.71304	2.23542e-06	8.26098e-05	0.0823416	ENSOMYG00000028962	ENSOMYG00000028962	protein_coding
gene:ENSOMYG00000039893	8	13433765..13446612	9.69504	1.89152	3.71027	1.901e-06	7.24601e-05	0.0700235	ENSOMYG00000039893	ENSOMYG00000039893	protein_coding
ube2d1a_2	23	27990203..27992695	8.87669	1.88956	3.70522	6.44003e-06	0.000195442	0.237219	ENSOMYG00000042803	ENSOMYG00000042803	protein_coding
UROS_1	1	94053386..94068241	2.8018	1.88885	3.70339	1.17211e-05	0.00031382	0.431746	ENSOMYG00000022570	ENSOMYG00000022570	protein_coding
gene:ENSOMYG00000046530	17	complement(54679841..54685751)	54.7137	1.88755	3.70007	1.60194e-05	0.000407072	0.590074	ENSOMYG00000046530	ENSOMYG00000046530	protein_coding
gene:ENSOMYG00000036779	26	29001398..29006420	2.76485	1.88426	3.69163	0.000602128	0.00701344	1	ENSOMYG00000036779	ENSOMYG00000036779	protein_coding
ASPSCR1_1	17	13383239..13433293	20.2655	1.88349	3.68967	0.000420205	0.00535805	1	ENSOMYG00000007321	ENSOMYG00000007321	protein_coding
gene:ENSOMYG00000042612	Y	34519416..34521735	50.863	1.88038	3.68171	3.01885e-06	0.000104296	0.111199	ENSOMYG00000042612	ENSOMYG00000042612	protein_coding
crbn	17	complement(62307908..62323921)	21.9882	1.88032	3.68158	2.87216e-06	0.000100179	0.105796	ENSOMYG00000008195	ENSOMYG00000008195	protein_coding
FDPS_2	3	8767971..8771898	61.3158	1.88003	3.68084	7.95617e-06	0.000230205	0.293065	ENSOMYG00000048301	ENSOMYG00000048301	protein_coding
ATP10D	25	24317525..24355166	2.99466	1.87991	3.68052	5.83801e-05	0.00114344	1	ENSOMYG00000034681	ENSOMYG00000034681	protein_coding
tgfb2_2	3	complement(34579010..34612727)	7.98216	1.87899	3.67818	1.974e-06	7.44809e-05	0.0727124	ENSOMYG00000010167	ENSOMYG00000010167	protein_coding
hspbap1	22	complement(36407973..36441250)	2.63173	1.87874	3.67753	0.000100561	0.00175375	1	ENSOMYG00000042103	ENSOMYG00000042103	protein_coding
gene:ENSOMYG00000000260	2	complement(29805589..29808587)	6.35551	1.87809	3.67588	0.000213939	0.00316341	1	ENSOMYG00000000260	ENSOMYG00000000260	protein_coding
litaf	13	39250400..39253620	15.68	1.87805	3.67578	1.45761e-07	8.73261e-06	0.00536909	ENSOMYG00000016837	ENSOMYG00000016837	protein_coding
rnf11a	17	complement(20569596..20570645)	3.53604	1.87667	3.67226	0.00457113	0.0330466	1	ENSOMYG00000043465	ENSOMYG00000043465	protein_coding
gene:ENSOMYG00000026844	18	33534766..33537568	2.83438	1.87625	3.6712	0.000114961	0.00194623	1	ENSOMYG00000026844	ENSOMYG00000026844	protein_coding
fbxo25	4	complement(23801294..23818454)	3.14918	1.87586	3.67021	4.4327e-05	0.000922484	1	ENSOMYG00000022915	ENSOMYG00000022915	protein_coding
smox	19	20334667..20362437	12.6923	1.87275	3.6623	0.000607227	0.00705394	1	ENSOMYG00000015547	ENSOMYG00000015547	protein_coding
bloc1s4_1	18	45764265..45767479	5.20183	1.87254	3.66177	0.000298734	0.00412941	1	ENSOMYG00000032318	ENSOMYG00000032318	protein_coding
gene:ENSOMYG00000013629	17	complement(48556106..48571690)	10.3619	1.87185	3.66	2.74654e-06	9.64585e-05	0.101169	ENSOMYG00000013629	ENSOMYG00000013629	protein_coding
sgms1b_1	16	complement(13286534..13290469)	3.59019	1.8713	3.65862	5.68676e-06	0.000177507	0.209472	ENSOMYG00000013144	ENSOMYG00000013144	protein_coding
zftraf1_2	32	10050059..10061754	16.1091	1.87102	3.65791	2.0713e-07	1.1825e-05	0.00762963	ENSOMYG00000005872	ENSOMYG00000005872	protein_coding
mfsd11_2	13	46487747..46492258	0.902286	1.87086	3.6575	0.00435157	0.0319124	1	ENSOMYG00000029341	ENSOMYG00000029341	protein_coding
gene:ENSOMYG00000035537	18	complement(64679107..64696436)	4.62938	1.87017	3.65576	4.4629e-07	2.21942e-05	0.0164391	ENSOMYG00000035537	ENSOMYG00000035537	protein_coding
meaf6	32	complement(21387305..21397166)	25.925	1.8681	3.65051	4.76141e-07	2.32251e-05	0.0175386	ENSOMYG00000008396	ENSOMYG00000008396	protein_coding
gene:ENSOMYG00000025707	18	complement(22897933..22948423)	0.74786	1.86798	3.65022	0.00219432	0.0189911	1	ENSOMYG00000025707	ENSOMYG00000025707	protein_coding
syngr2b_1	17	13559837..13567378	118.76	1.86759	3.64922	4.85558e-05	0.000989242	1	ENSOMYG00000032716	ENSOMYG00000032716	protein_coding
SLC25A47	19	57826999..57829407	6.59477	1.86746	3.64889	8.06198e-05	0.00146207	1	ENSOMYG00000011048	ENSOMYG00000011048	protein_coding
gene:ENSOMYG00000017660	9	complement(67225241..67240075)	1.4803	1.86657	3.64665	0.000899456	0.00963023	1	ENSOMYG00000017660	ENSOMYG00000017660	protein_coding
gene:ENSOMYG00000038410	18	37931791..37937672	1.50184	1.86353	3.63896	0.000982128	0.0103591	1	ENSOMYG00000038410	ENSOMYG00000038410	protein_coding
gene:ENSOMYG00000043819	15	39557142..39589100	10.525	1.8634	3.63865	2.48043e-06	8.95838e-05	0.0913665	ENSOMYG00000043819	ENSOMYG00000043819	protein_coding
rab2a_2	28	27331000..27344421	43.0332	1.86257	3.63654	6.83593e-06	0.000204694	0.251802	ENSOMYG00000047746	ENSOMYG00000047746	protein_coding
gene:ENSOMYG00000077206	13	50644753..50647111	6.0331	1.86234	3.63596	0.00428901	0.0314989	1	ENSOMYG00000077206	ENSOMYG00000077206	protein_coding
gene:ENSOMYG00000054805	15	complement(77417970..77507238)	2.26403	1.861	3.63258	5.22222e-05	0.00104371	1	ENSOMYG00000054805	ENSOMYG00000054805	protein_coding
gene:ENSOMYG00000003376	32	10670316..10675001	78.582	1.86082	3.63215	4.94118e-05	0.00100152	1	ENSOMYG00000003376	ENSOMYG00000003376	protein_coding
med27_1	6	17225615..17318867	3.81221	1.8601	3.63033	1.16603e-05	0.00031318	0.429507	ENSOMYG00000002097	ENSOMYG00000002097	protein_coding
prom1a_1	14	18997557..19110138	10.6843	1.85988	3.62979	1.27759e-06	5.29806e-05	0.0470602	ENSOMYG00000031568	ENSOMYG00000031568	protein_coding
zgc:175214_2	17	23098194..23101768	25.4646	1.85969	3.62931	1.02861e-06	4.42811e-05	0.037889	ENSOMYG00000013756	ENSOMYG00000013756	protein_coding
HTD2	7	complement(87555230..87556476)	6.43476	1.85898	3.62752	0.000371702	0.00489869	1	ENSOMYG00000001991	ENSOMYG00000001991	protein_coding
hacl1_1	2	complement(7861636..7871481)	9.69827	1.85892	3.62735	0.000128731	0.00213117	1	ENSOMYG00000056364	ENSOMYG00000056364	protein_coding
gene:ENSOMYG00000064873	30	complement(15184042..15196065)	2.18309	1.85801	3.62507	0.00323625	0.0255429	1	ENSOMYG00000064873	ENSOMYG00000064873	protein_coding
gene:ENSOMYG00000042401	23	complement(19112631..19118863)	2.76538	1.85509	3.61773	0.00355312	0.0274067	1	ENSOMYG00000042401	ENSOMYG00000042401	protein_coding
gene:ENSOMYG00000069964	18	774717..780908	2.53826	1.85344	3.61362	0.00137199	0.0132726	1	ENSOMYG00000069964	ENSOMYG00000069964	protein_coding
gene:ENSOMYG00000023101	12	59884149..59935414	8.48018	1.85226	3.61066	4.24874e-06	0.000138694	0.156502	ENSOMYG00000023101	ENSOMYG00000023101	protein_coding
gene:ENSOMYG00000040922	Y	1522599..1531378	7.9753	1.85027	3.60568	5.71085e-06	0.00017798	0.210359	ENSOMYG00000040922	ENSOMYG00000040922	protein_coding
gene:ENSOMYG00000033570	12	complement(21274722..21289057)	46.6416	1.84958	3.60394	1.75274e-05	0.000436676	0.645622	ENSOMYG00000033570	ENSOMYG00000033570	protein_coding
ABHD5_2	3	complement(4634924..4648798)	14.0643	1.84927	3.60319	4.50317e-07	2.23073e-05	0.0165874	ENSOMYG00000018748	ENSOMYG00000018748	protein_coding
gene:ENSOMYG00000002411	2	18708594..18719208	2.93194	1.84731	3.59827	2.25717e-06	8.30576e-05	0.083143	ENSOMYG00000002411	ENSOMYG00000002411	protein_coding
ctns_2	5	60533971..60542541	1.57265	1.84621	3.59554	1.72421e-05	0.000431087	0.635113	ENSOMYG00000067836	ENSOMYG00000067836	protein_coding
TMEM131L_1	10	55043644..55144011	35.7212	1.84408	3.59025	5.14778e-05	0.00103126	1	ENSOMYG00000004786	ENSOMYG00000004786	protein_coding
CAV3_4	17	complement(60599692..60602689)	110.325	1.84382	3.5896	6.76712e-06	0.000203189	0.249267	ENSOMYG00000053801	ENSOMYG00000053801	protein_coding
zgc:112148	12	93019015..93022462	3.41988	1.842	3.58506	0.00254278	0.0212904	1	ENSOMYG00000009293	ENSOMYG00000009293	protein_coding
gene:ENSOMYG00000069687	24	36996177..37078150	1.25975	1.84182	3.58461	1.31445e-05	0.000345845	0.484178	ENSOMYG00000069687	ENSOMYG00000069687	protein_coding
NKRF_1	14	20377531..20380036	13.0038	1.84135	3.58344	0.000102466	0.00177723	1	ENSOMYG00000021107	ENSOMYG00000021107	protein_coding
smarcc1b_2	18	53714483..53727051	2.38469	1.84085	3.5822	0.000144388	0.00232685	1	ENSOMYG00000052255	ENSOMYG00000052255	protein_coding
gene:ENSOMYG00000042380	7	complement(22748010..22768725)	8.37056	1.84065	3.58171	3.54679e-07	1.8582e-05	0.0130646	ENSOMYG00000042380	ENSOMYG00000042380	protein_coding
znf740b_2	16	complement(41691129..41697240)	3.84339	1.83989	3.57982	9.55924e-05	0.0016886	1	ENSOMYG00000027225	ENSOMYG00000027225	protein_coding
syap1	18	6807925..6815407	47.0574	1.83857	3.57657	3.67804e-06	0.00012274	0.135481	ENSOMYG00000035438	ENSOMYG00000035438	protein_coding
rbm41	2	complement(50665517..50678697)	8.70917	1.83825	3.57577	2.4082e-06	8.78476e-05	0.0887061	ENSOMYG00000018599	ENSOMYG00000018599	protein_coding
MICALL1	13	42788152..42793743	1.86299	1.83761	3.57417	0.000110298	0.00188106	1	ENSOMYG00000012932	ENSOMYG00000012932	protein_coding
senp7b_2	18	13475575..13502507	1.52571	1.83629	3.57091	6.97599e-05	0.00130317	1	ENSOMYG00000042370	ENSOMYG00000042370	protein_coding
gene:ENSOMYG00000020134	31	complement(17049923..17051472)	2.6157	1.83304	3.56286	0.0018094	0.0163661	1	ENSOMYG00000020134	ENSOMYG00000020134	protein_coding
gene:ENSOMYG00000044529	26	complement(15800496..15810065)	5.4134	1.83164	3.5594	4.16062e-06	0.000136167	0.153257	ENSOMYG00000044529	ENSOMYG00000044529	protein_coding
cdkn2aip_1	6	81883157..81888710	4.19688	1.83057	3.55677	2.14012e-05	0.000512014	0.788315	ENSOMYG00000061453	ENSOMYG00000061453	protein_coding
gene:ENSOMYG00000013512	17	30245143..30250078	1.46823	1.82784	3.55004	0.00301302	0.024163	1	ENSOMYG00000013512	ENSOMYG00000013512	protein_coding
gene:ENSOMYG00000034760	15	complement(62729252..62737422)	2.01761	1.82772	3.54977	0.000275167	0.00385809	1	ENSOMYG00000034760	ENSOMYG00000034760	protein_coding
TXNL1	5	4654203..4667281	76.1433	1.82771	3.54974	0.000135533	0.0022164	1	ENSOMYG00000029786	ENSOMYG00000029786	protein_coding
b3gntl1	17	complement(11096298..11171429)	0.539635	1.82712	3.54829	0.00207576	0.0182491	1	ENSOMYG00000066855	ENSOMYG00000066855	protein_coding
asb5b_1	10	65274536..65287523	11.1807	1.82645	3.54662	4.74829e-06	0.000152268	0.174903	ENSOMYG00000006164	ENSOMYG00000006164	protein_coding
gene:ENSOMYG00000034083	12	30774301..30788228	5.19145	1.82485	3.5427	0.000674961	0.00765858	1	ENSOMYG00000034083	ENSOMYG00000034083	protein_coding
PIK3R6_2	13	complement(18413109..18424678)	3.03381	1.82455	3.54196	2.78772e-05	0.000638891	1	ENSOMYG00000033060	ENSOMYG00000033060	protein_coding
rpp14	7	complement(87556544..87565383)	5.32405	1.82378	3.54007	0.00167715	0.0154835	1	ENSOMYG00000002024	ENSOMYG00000002024	protein_coding
gene:ENSOMYG00000062483	6	complement(96995286..96995798)	5.85702	1.82328	3.53884	0.00670956	0.0437824	1	ENSOMYG00000062483	ENSOMYG00000062483	protein_coding
spns1_2	30	44274703..44290113	3.43271	1.8232	3.53865	1.50162e-06	6.03065e-05	0.0553123	ENSOMYG00000045834	ENSOMYG00000045834	protein_coding
gene:ENSOMYG00000029330	12	29651355..29654980	11.271	1.82232	3.53649	8.3838e-07	3.74506e-05	0.0308817	ENSOMYG00000029330	ENSOMYG00000029330	protein_coding
gene:ENSOMYG00000076411	6	99022795..99314537	7.63647	1.82141	3.53426	1.49377e-05	0.000383025	0.550231	ENSOMYG00000076411	ENSOMYG00000076411	protein_coding
gene:ENSOMYG00000041155	23	24150017..24167747	1.35079	1.82093	3.53309	0.00493209	0.0350491	1	ENSOMYG00000041155	ENSOMYG00000041155	protein_coding
mkrn1_1	15	complement(78160644..78194398)	25.0338	1.81954	3.52968	1.56961e-05	0.000399655	0.578168	ENSOMYG00000072624	ENSOMYG00000072624	protein_coding
gene:ENSOMYG00000026293	2	complement(20662992..20665173)	1.52374	1.81789	3.52566	0.000613351	0.0071084	1	ENSOMYG00000026293	ENSOMYG00000026293	protein_coding
gene:ENSOMYG00000033091	9	complement(35364060..35371837)	4.56911	1.81788	3.52562	6.77755e-05	0.00127924	1	ENSOMYG00000033091	ENSOMYG00000033091	protein_coding
gene:ENSOMYG00000065759	12	92539682..92541147	8.83706	1.81771	3.52521	0.0057008	0.0389466	1	ENSOMYG00000065759	ENSOMYG00000065759	protein_coding
zgc:101731_1	24	7013081..7023919	0.861139	1.8177	3.5252	0.00220048	0.0190379	1	ENSOMYG00000025656	ENSOMYG00000025656	protein_coding
gene:ENSOMYG00000013945	9	complement(14351266..14353092)	1.59404	1.81426	3.51678	0.00412942	0.0306372	1	ENSOMYG00000013945	ENSOMYG00000013945	protein_coding
BMAL1_3	6	complement(66099005..66122551)	4.07776	1.81168	3.5105	5.91108e-06	0.000182655	0.217734	ENSOMYG00000044791	ENSOMYG00000044791	protein_coding
ptpn4a_1	3	54234999..54363309	9.06776	1.81023	3.50699	1.68096e-06	6.54444e-05	0.0619182	ENSOMYG00000015383	ENSOMYG00000015383	protein_coding
ahi1	19	complement(27397324..27413856)	1.51457	1.80943	3.50505	0.000216911	0.00318879	1	ENSOMYG00000035270	ENSOMYG00000035270	protein_coding
gene:ENSOMYG00000011089	7	42988218..42991364	2.60933	1.80899	3.50397	0.00146835	0.0140282	1	ENSOMYG00000011089	ENSOMYG00000011089	protein_coding
ciapin1_1	1	complement(24596085..24602378)	14.157	1.80876	3.50341	3.63163e-06	0.000121546	0.133771	ENSOMYG00000030376	ENSOMYG00000030376	protein_coding
gene:ENSOMYG00000051089	20	complement(22418580..22445882)	9.62742	1.80815	3.50193	0.000314137	0.00428648	1	ENSOMYG00000051089	ENSOMYG00000051089	protein_coding
urod_2	28	20674606..20681683	7.67207	1.80745	3.50024	0.000663697	0.00754759	1	ENSOMYG00000045957	ENSOMYG00000045957	protein_coding
slc16a12b_1	16	complement(13657931..13676849)	1.32973	1.80471	3.49358	0.002275	0.0195696	1	ENSOMYG00000016656	ENSOMYG00000016656	protein_coding
nipa2_2	5	complement(97968254..97981761)	3.01052	1.80465	3.49344	0.00162166	0.0151384	1	ENSOMYG00000014702	ENSOMYG00000014702	protein_coding
crlf3_2	13	complement(70511669..70535307)	26.0337	1.80308	3.48964	4.6378e-06	0.000149599	0.170833	ENSOMYG00000003408	ENSOMYG00000003408	protein_coding
gene:ENSOMYG00000037905	19	6122053..6149651	0.947473	1.80197	3.48697	0.00377478	0.0286307	1	ENSOMYG00000037905	ENSOMYG00000037905	protein_coding
gene:ENSOMYG00000056334	2	complement(17457914..17483510)	7.87967	1.79921	3.4803	1.32928e-05	0.000348928	0.489639	ENSOMYG00000056334	ENSOMYG00000056334	protein_coding
nelfa_1	9	complement(16426818..16441102)	3.59829	1.79836	3.47823	4.16385e-05	0.000878375	1	ENSOMYG00000012032	ENSOMYG00000012032	protein_coding
gene:ENSOMYG00000067287	13	complement(27322862..27360113)	1.76572	1.79651	3.47379	1.94986e-05	0.000475093	0.71823	ENSOMYG00000067287	ENSOMYG00000067287	protein_coding
mustn1b	7	complement(49296120..49297241)	190.334	1.79576	3.47198	0.00109534	0.0111961	1	ENSOMYG00000001536	ENSOMYG00000001536	protein_coding
YKT6_1	6	39916051..39919962	18.9471	1.79496	3.47005	3.43613e-06	0.000115882	0.12657	ENSOMYG00000033499	ENSOMYG00000033499	protein_coding
gene:ENSOMYG00000014429	15	61014056..61016302	6.16271	1.79314	3.46568	1.97355e-05	0.000480063	0.726958	ENSOMYG00000014429	ENSOMYG00000014429	protein_coding
gene:ENSOMYG00000041455	16	complement(26348553..26369040)	7.16237	1.79253	3.46421	8.36657e-06	0.000238822	0.308183	ENSOMYG00000041455	ENSOMYG00000041455	protein_coding
ubb	12	34768113..34770672	352.274	1.79106	3.46069	0.000944708	0.0100267	1	ENSOMYG00000073366	ENSOMYG00000073366	protein_coding
gene:ENSOMYG00000028856	13	complement(46230696..46234555)	6.26024	1.78932	3.45651	8.41646e-05	0.00151663	1	ENSOMYG00000028856	ENSOMYG00000028856	protein_coding
hopx_1	14	14270171..14279268	6.04668	1.78914	3.45608	8.69072e-06	0.000245325	0.320123	ENSOMYG00000071693	ENSOMYG00000071693	protein_coding
hdac9b_1	2	8206245..8328778	56.1403	1.78726	3.4516	1.14811e-05	0.000310661	0.422906	ENSOMYG00000077335	ENSOMYG00000077335	protein_coding
map1lc3b_1	1	23804618..23821798	57.2722	1.7868	3.4505	1.21818e-05	0.000324109	0.448716	ENSOMYG00000077514	ENSOMYG00000077514	protein_coding
gene:ENSOMYG00000032066	24	9736536..9756415	1.48878	1.78667	3.45017	0.00141421	0.0135984	1	ENSOMYG00000032066	ENSOMYG00000032066	protein_coding
cyb561a3a	11	complement(67535682..67551785)	10.2123	1.78632	3.44933	7.92211e-06	0.00022948	0.291811	ENSOMYG00000041125	ENSOMYG00000041125	protein_coding
CREG1_2	18	12882620..12884157	31.2961	1.78626	3.4492	0.00313461	0.0249028	1	ENSOMYG00000042779	ENSOMYG00000042779	protein_coding
dcaf11	15	complement(20886038..20900181)	35.8539	1.78595	3.44846	7.73349e-06	0.000224783	0.284863	ENSOMYG00000008103	ENSOMYG00000008103	protein_coding
si:ch211-260e23.9_2	26	20487200..20489969	27.5872	1.78314	3.44175	6.65322e-06	0.000200935	0.245071	ENSOMYG00000046844	ENSOMYG00000046844	protein_coding
gene:ENSOMYG00000026437	11	complement(13884513..13927366)	3.76999	1.7825	3.44023	7.42277e-06	0.00021749	0.273418	ENSOMYG00000026437	ENSOMYG00000026437	protein_coding
afg2b_1	6	complement(79903248..79916761)	1.60037	1.78225	3.43963	0.00360106	0.027627	1	ENSOMYG00000031657	ENSOMYG00000031657	protein_coding
rab4a_1	20	27062312..27066728	6.18424	1.78201	3.43905	4.20094e-05	0.000884734	1	ENSOMYG00000041101	ENSOMYG00000041101	protein_coding
fam135a_2	23	complement(60267963..60317201)	5.72558	1.78088	3.43637	7.03502e-07	3.21882e-05	0.0259135	ENSOMYG00000027568	ENSOMYG00000027568	protein_coding
lmbrd1_1	1	85641610..85861468	3.07728	1.77941	3.43286	0.00216872	0.0188526	1	ENSOMYG00000061846	ENSOMYG00000061846	protein_coding
HBP1_1	2	95752319..95761520	15.7417	1.77922	3.4324	1.49046e-06	6.00477e-05	0.0549012	ENSOMYG00000023046	ENSOMYG00000023046	protein_coding
gene:ENSOMYG00000002446	3	10179987..10193284	1.81592	1.77878	3.43136	3.07182e-05	0.000690332	1	ENSOMYG00000002446	ENSOMYG00000002446	protein_coding
plbd1a_2	13	complement(42613295..42616956)	1.45318	1.77858	3.43089	0.0029921	0.024071	1	ENSOMYG00000009119	ENSOMYG00000009119	protein_coding
tbc1d17_1	12	complement(81436033..81445304)	9.92952	1.77645	3.42582	4.65091e-06	0.000149711	0.171316	ENSOMYG00000014184	ENSOMYG00000014184	protein_coding
INPP5K_1	24	7720063..7729077	5.00555	1.77562	3.42385	1.17479e-05	0.000314207	0.432734	ENSOMYG00000028724	ENSOMYG00000028724	protein_coding
gene:ENSOMYG00000035611	19	48040081..48109775	4.36452	1.77557	3.42374	1.54323e-06	6.15888e-05	0.0568448	ENSOMYG00000035611	ENSOMYG00000035611	protein_coding
gene:ENSOMYG00000025722	1	complement(35940435..35961242)	14.0702	1.77485	3.42203	1.08235e-05	0.000295879	0.398682	ENSOMYG00000025722	ENSOMYG00000025722	protein_coding
sft2d3	8	complement(46462878..46463552)	2.9776	1.77286	3.41732	0.00230931	0.0197845	1	ENSOMYG00000011440	ENSOMYG00000011440	protein_coding
fbxw11a_2	31	complement(27176350..27191315)	17.8426	1.77241	3.41625	3.60711e-06	0.000121007	0.132868	ENSOMYG00000029481	ENSOMYG00000029481	protein_coding
gene:ENSOMYG00000055216	23	36643292..36647283	3.57114	1.77239	3.41618	9.32321e-05	0.00165197	1	ENSOMYG00000055216	ENSOMYG00000055216	protein_coding
ece1_2	17	68276352..68321330	1.0008	1.77231	3.416	0.000633368	0.00728731	1	ENSOMYG00000031040	ENSOMYG00000031040	protein_coding
gene:ENSOMYG00000043294	24	27863162..27887115	7.95308	1.77216	3.41564	2.43113e-05	0.000571047	0.895507	ENSOMYG00000043294	ENSOMYG00000043294	protein_coding
gene:ENSOMYG00000022233	21	11311516..11316706	12.801	1.77208	3.41546	2.74287e-06	9.64585e-05	0.101034	ENSOMYG00000022233	ENSOMYG00000022233	protein_coding
gene:ENSOMYG00000000915	1	complement(45990529..46024819)	0.544682	1.7718	3.4148	0.00521673	0.0365002	1	ENSOMYG00000000915	ENSOMYG00000000915	protein_coding
gene:ENSOMYG00000063860	12	complement(66247533..66248255)	325.739	1.77095	3.41278	0.000213517	0.00316263	1	ENSOMYG00000063860	ENSOMYG00000063860	protein_coding
gene:ENSOMYG00000014043	15	16716334..16718761	9.95473	1.77024	3.41111	8.31794e-06	0.000237701	0.306391	ENSOMYG00000014043	ENSOMYG00000014043	protein_coding
slc35b4_2	2	94529656..94541344	2.4334	1.77021	3.41105	0.000459652	0.00572867	1	ENSOMYG00000009392	ENSOMYG00000009392	protein_coding
mindy2_2	26	complement(27848671..27868821)	7.53961	1.76903	3.40826	3.94992e-05	0.00084515	1	ENSOMYG00000045005	ENSOMYG00000045005	protein_coding
WHAMM_1	6	91764163..91788280	14.6271	1.76815	3.40617	3.49621e-06	0.000117441	0.128783	ENSOMYG00000057419	ENSOMYG00000057419	protein_coding
ABHD5_1	2	complement(13176881..13188902)	7.88922	1.76814	3.40615	3.89484e-05	0.000835472	1	ENSOMYG00000072525	ENSOMYG00000072525	protein_coding
gene:ENSOMYG00000031033	8	complement(32215464..32217473)	18.3979	1.76797	3.40575	5.45108e-06	0.000171776	0.20079	ENSOMYG00000031033	ENSOMYG00000031033	protein_coding
gene:ENSOMYG00000030803	2	73435824..73455216	4.47664	1.76688	3.40317	6.64421e-05	0.00126533	1	ENSOMYG00000030803	ENSOMYG00000030803	protein_coding
h1-10	17	complement(61868214..61868798)	101.758	1.76678	3.40294	3.22265e-05	0.000717265	1	ENSOMYG00000077439	ENSOMYG00000077439	protein_coding
gene:ENSOMYG00000019219	18	complement(16516933..16550589)	6.40569	1.76628	3.40175	5.38297e-07	2.59586e-05	0.0198282	ENSOMYG00000019219	ENSOMYG00000019219	protein_coding
st3gal3a_2	30	33437539..33531161	17.8321	1.76489	3.39849	2.9349e-05	0.000666029	1	ENSOMYG00000027066	ENSOMYG00000027066	protein_coding
WIPI1_1	20	complement(23887488..23895497)	5.66589	1.76407	3.39656	8.17405e-06	0.000234378	0.301091	ENSOMYG00000035284	ENSOMYG00000035284	protein_coding
ube3c_1	11	complement(33336235..33376788)	11.1292	1.76289	3.39377	2.07221e-05	0.000496822	0.763297	ENSOMYG00000015205	ENSOMYG00000015205	protein_coding
gene:ENSOMYG00000013082	3	53865769..53869363	9.59273	1.76243	3.3927	6.55097e-07	3.03827e-05	0.0241305	ENSOMYG00000013082	ENSOMYG00000013082	protein_coding
gene:ENSOMYG00000000529	1	41462464..41593811	0.77446	1.76139	3.39024	0.000422531	0.00537924	1	ENSOMYG00000000529	ENSOMYG00000000529	protein_coding
gene:ENSOMYG00000009362	12	83384672..83390354	10.5791	1.76119	3.38978	3.64311e-05	0.000791475	1	ENSOMYG00000009362	ENSOMYG00000009362	protein_coding
gene:ENSOMYG00000025441	26	complement(38322534..38347634)	8.59862	1.76041	3.38794	6.29911e-06	0.000191743	0.232028	ENSOMYG00000025441	ENSOMYG00000025441	protein_coding
gene:ENSOMYG00000058326	18	complement(5821167..5870482)	1.1301	1.75934	3.38543	0.0029746	0.0239606	1	ENSOMYG00000058326	ENSOMYG00000058326	protein_coding
gene:ENSOMYG00000030632	19	complement(39689926..39692456)	3.50003	1.7585	3.38345	0.000132282	0.00217441	1	ENSOMYG00000030632	ENSOMYG00000030632	protein_coding
MAU2_3	8	complement(79048053..79059777)	7.41575	1.75829	3.38296	2.859e-06	9.98572e-05	0.105311	ENSOMYG00000026067	ENSOMYG00000026067	protein_coding
gene:ENSOMYG00000002119	8	complement(8990035..9000183)	3.11952	1.75803	3.38236	0.000560378	0.00665191	1	ENSOMYG00000002119	ENSOMYG00000002119	protein_coding
bbs1	Y	34156479..34163515	1.59128	1.75791	3.38207	0.000202031	0.00302772	1	ENSOMYG00000029975	ENSOMYG00000029975	protein_coding
pdcd7_1	6	complement(82382160..82385624)	1.77723	1.75752	3.38116	0.00057899	0.00680935	1	ENSOMYG00000019296	ENSOMYG00000019296	protein_coding
gene:ENSOMYG00000034531	11	complement(25819323..25833184)	20.6446	1.75663	3.37907	3.50802e-05	0.000766706	1	ENSOMYG00000034531	ENSOMYG00000034531	protein_coding
gene:ENSOMYG00000031739	9	complement(55035977..55114146)	15.1492	1.7563	3.37832	3.13358e-05	0.000699889	1	ENSOMYG00000031739	ENSOMYG00000031739	protein_coding
cd164_1	4	26652154..26662448	5.8329	1.75393	3.37275	4.43453e-05	0.000922484	1	ENSOMYG00000008587	ENSOMYG00000008587	protein_coding
ctdsp2	16	41938924..41951353	6.58335	1.75364	3.37208	0.000302584	0.00417582	1	ENSOMYG00000029051	ENSOMYG00000029051	protein_coding
gene:ENSOMYG00000042286	15	19768705..19772518	8.90803	1.75314	3.37092	2.95691e-06	0.000102434	0.108918	ENSOMYG00000042286	ENSOMYG00000042286	protein_coding
tbl1x_2	22	26481881..26497937	7.9361	1.753	3.3706	2.84593e-05	0.00064931	1	ENSOMYG00000019289	ENSOMYG00000019289	protein_coding
chm	10	48805091..48840500	47.4505	1.75164	3.36742	0.000219774	0.0032253	1	ENSOMYG00000046491	ENSOMYG00000046491	protein_coding
MTMR14_1	7	complement(76611358..76658972)	7.69443	1.75148	3.36703	4.4801e-06	0.000144946	0.165025	ENSOMYG00000009647	ENSOMYG00000009647	protein_coding
gene:ENSOMYG00000006630	10	1049870..1084580	1.18326	1.75124	3.36648	0.000681075	0.00771623	1	ENSOMYG00000006630	ENSOMYG00000006630	protein_coding
nr1h3_2	26	16636086..16655471	3.01664	1.75112	3.36621	0.000156599	0.00246283	1	ENSOMYG00000025876	ENSOMYG00000025876	protein_coding
gene:ENSOMYG00000027319	8	complement(80425925..80476089)	4.96437	1.7502	3.36406	0.000415553	0.00533115	1	ENSOMYG00000027319	ENSOMYG00000027319	protein_coding
gene:ENSOMYG00000047772	9	complement(41169696..41237771)	7.57107	1.74949	3.36239	2.54773e-05	0.000591883	0.938458	ENSOMYG00000047772	ENSOMYG00000047772	protein_coding
gene:ENSOMYG00000030322	21	complement(45817156..45842425)	4.34662	1.74938	3.36215	8.92081e-05	0.00159286	1	ENSOMYG00000030322	ENSOMYG00000030322	protein_coding
susd6	8	complement(7420061..7466781)	5.65997	1.7493	3.36194	9.34817e-06	0.000263009	0.34434	ENSOMYG00000003935	ENSOMYG00000003935	protein_coding
adat3	3	complement(45211174..45212268)	3.97925	1.7472	3.35706	0.000351134	0.00467848	1	ENSOMYG00000032097	ENSOMYG00000032097	protein_coding
gene:ENSOMYG00000025815	18	33479573..33487931	2.96277	1.74714	3.35693	0.000261709	0.00370202	1	ENSOMYG00000025815	ENSOMYG00000025815	protein_coding
gene:ENSOMYG00000032210	25	complement(11020917..11214834)	1.8091	1.74698	3.35654	0.000312446	0.00427486	1	ENSOMYG00000032210	ENSOMYG00000032210	protein_coding
wipi1_2	13	complement(69985852..70020004)	2.4163	1.7462	3.35473	8.41545e-06	0.000239412	0.309983	ENSOMYG00000055529	ENSOMYG00000055529	protein_coding
cul4a_2	18	complement(6119709..6145653)	32.8743	1.74484	3.35157	8.85328e-05	0.00158191	1	ENSOMYG00000053139	ENSOMYG00000053139	protein_coding
gene:ENSOMYG00000032301	14	complement(11070979..11084551)	19.4736	1.74255	3.34625	4.00046e-06	0.000131602	0.147357	ENSOMYG00000032301	ENSOMYG00000032301	protein_coding
ggps1	16	complement(1577369..1599826)	8.05698	1.74166	3.3442	3.10925e-05	0.000696287	1	ENSOMYG00000027619	ENSOMYG00000027619	protein_coding
rfc1_2	10	complement(87325858..87370124)	4.46529	1.74165	3.34418	2.3011e-06	8.45463e-05	0.084761	ENSOMYG00000062693	ENSOMYG00000062693	protein_coding
gene:ENSOMYG00000017004	32	complement(31598243..31610769)	12.2568	1.74113	3.34298	7.53314e-06	0.000220217	0.277483	ENSOMYG00000017004	ENSOMYG00000017004	protein_coding
slc49a4_2	22	36435151..36519698	2.49435	1.74102	3.34272	6.56619e-05	0.00125423	1	ENSOMYG00000042128	ENSOMYG00000042128	protein_coding
EZH1_2	13	37881417..37899353	19.4701	1.74079	3.34218	2.63606e-05	0.000608517	0.970994	ENSOMYG00000008711	ENSOMYG00000008711	protein_coding
psb9	18	40213765..40223810	3.12888	1.74018	3.34076	0.00796049	0.0494849	1	ENSOMYG00000008514	ENSOMYG00000008514	protein_coding
gene:ENSOMYG00000012921	11	complement(11549374..11553590)	8.04184	1.73913	3.33834	2.45904e-06	8.93184e-05	0.0905789	ENSOMYG00000012921	ENSOMYG00000012921	protein_coding
pcbp3	22	complement(5244387..5314366)	3.97857	1.73897	3.33796	0.000139957	0.00226691	1	ENSOMYG00000035835	ENSOMYG00000035835	protein_coding
otud3	9	complement(52581602..52587578)	10.4167	1.73895	3.33791	4.25671e-06	0.000138776	0.156796	ENSOMYG00000040481	ENSOMYG00000040481	protein_coding
gene:ENSOMYG00000016185	1	complement(44788310..44791617)	6.67107	1.73852	3.33692	7.36389e-06	0.000217013	0.271249	ENSOMYG00000016185	ENSOMYG00000016185	protein_coding
nbr1a_2	20	16813249..16822683	16.2185	1.73802	3.33577	2.00427e-05	0.000485102	0.738273	ENSOMYG00000013239	ENSOMYG00000013239	protein_coding
usp45_1	2	42529919..42571384	4.86682	1.738	3.33572	5.36604e-06	0.000169516	0.197658	ENSOMYG00000042501	ENSOMYG00000042501	protein_coding
slc35e4_2	Y	complement(27310683..27317595)	5.39574	1.73763	3.33486	3.14304e-05	0.000701386	1	ENSOMYG00000046874	ENSOMYG00000046874	protein_coding
yod1_2	17	complement(68448286..68453228)	1.77656	1.73713	3.33371	0.00183912	0.0165527	1	ENSOMYG00000042650	ENSOMYG00000042650	protein_coding
zfand5a_1	6	19460194..19469466	34.5504	1.73553	3.33002	0.000311305	0.00426153	1	ENSOMYG00000070481	ENSOMYG00000070481	protein_coding
mkrn1_2	21	9824015..9863875	11.9225	1.73531	3.3295	2.04047e-05	0.000492458	0.751605	ENSOMYG00000068993	ENSOMYG00000068993	protein_coding
gene:ENSOMYG00000029178	2	24541099..24543126	3.77757	1.73519	3.32924	0.00214304	0.018687	1	ENSOMYG00000029178	ENSOMYG00000029178	protein_coding
ULK1_2	Y	complement(17431378..17477037)	2.30699	1.7334	3.32511	4.42119e-05	0.00092211	1	ENSOMYG00000046852	ENSOMYG00000046852	protein_coding
snap47_2	28	12750473..12756520	16.5705	1.73257	3.3232	5.75626e-06	0.000179176	0.212032	ENSOMYG00000040763	ENSOMYG00000040763	protein_coding
gene:ENSOMYG00000012480	12	80757826..80762580	1.66216	1.73191	3.32168	0.000197033	0.00296504	1	ENSOMYG00000012480	ENSOMYG00000012480	protein_coding
gene:ENSOMYG00000017918	10	61004104..61031568	6.99546	1.73086	3.31926	1.49971e-06	6.03065e-05	0.0552418	ENSOMYG00000017918	ENSOMYG00000017918	protein_coding
DAPL1_2	22	complement(17057540..17063331)	32.1652	1.73039	3.31818	5.66824e-05	0.00111448	1	ENSOMYG00000041061	ENSOMYG00000041061	protein_coding
gene:ENSOMYG00000060787	22	complement(25396198..25399197)	26.4518	1.72781	3.31224	1.15805e-05	0.000312024	0.426567	ENSOMYG00000060787	ENSOMYG00000060787	protein_coding
LRRC42	8	83914102..83918914	5.8621	1.72749	3.31151	7.13059e-06	0.000210625	0.262655	ENSOMYG00000003047	ENSOMYG00000003047	protein_coding
gene:ENSOMYG00000000711	5	complement(58383899..58392550)	3.06387	1.72691	3.31018	0.00121181	0.0121143	1	ENSOMYG00000000711	ENSOMYG00000000711	protein_coding
gene:ENSOMYG00000028282	15	complement(49265780..49300425)	17.0758	1.72585	3.30775	0.000450081	0.00562867	1	ENSOMYG00000028282	ENSOMYG00000028282	protein_coding
nploc4_1	20	complement(38447211..38478927)	11.1459	1.72357	3.30252	0.00108669	0.0111346	1	ENSOMYG00000044652	ENSOMYG00000044652	protein_coding
SCLT1_1	10	76870069..76885575	5.10078	1.72319	3.30165	2.2163e-05	0.000526413	0.816375	ENSOMYG00000075636	ENSOMYG00000075636	protein_coding
gene:ENSOMYG00000042382	18	13133874..13134347	40.3359	1.72118	3.29707	0.000942877	0.0100115	1	ENSOMYG00000042382	ENSOMYG00000042382	protein_coding
RB1CC1_2	28	13801868..13817772	13.6514	1.72103	3.29673	4.00604e-05	0.000852857	1	ENSOMYG00000041485	ENSOMYG00000041485	protein_coding
wdr45	Y	12112538..12116446	30.3305	1.72028	3.29499	1.05777e-05	0.000290927	0.389629	ENSOMYG00000073998	ENSOMYG00000073998	protein_coding
gene:ENSOMYG00000005069	16	complement(42332824..42335784)	2.12504	1.71943	3.29306	0.00108315	0.0111206	1	ENSOMYG00000005069	ENSOMYG00000005069	protein_coding
CASP3	19	complement(22487741..22497530)	2.33349	1.71836	3.29063	0.000415672	0.00533115	1	ENSOMYG00000013103	ENSOMYG00000013103	protein_coding
gene:ENSOMYG00000013225	5	54346701..54366539	1.06761	1.716	3.28524	0.00029056	0.00403393	1	ENSOMYG00000013225	ENSOMYG00000013225	protein_coding
gene:ENSOMYG00000028638	4	40780385..40865291	0.69863	1.71233	3.27689	0.000605505	0.0070399	1	ENSOMYG00000028638	ENSOMYG00000028638	protein_coding
EZH1_1	12	71021718..71038370	17.7704	1.70998	3.27156	4.50111e-05	0.000932524	1	ENSOMYG00000011425	ENSOMYG00000011425	protein_coding
atp6v1d_2	8	30251668..30262632	12.6617	1.7095	3.27047	2.388e-05	0.000561953	0.879621	ENSOMYG00000010527	ENSOMYG00000010527	protein_coding
irf5_1	15	complement(48510586..48518695)	1.14089	1.70934	3.27011	0.00206038	0.0181527	1	ENSOMYG00000022034	ENSOMYG00000022034	protein_coding
gene:ENSOMYG00000077105	9	3302586..3303761	2.45287	1.7088	3.26889	0.00228342	0.0196023	1	ENSOMYG00000077105	ENSOMYG00000077105	protein_coding
gene:ENSOMYG00000014824	1	47741160..47769809	8.71989	1.70851	3.26823	1.63845e-05	0.000414281	0.603522	ENSOMYG00000014824	ENSOMYG00000014824	protein_coding
gprc5c_2	23	complement(42734179..42743598)	6.39021	1.70845	3.2681	0.000512725	0.0062078	1	ENSOMYG00000047386	ENSOMYG00000047386	protein_coding
gene:ENSOMYG00000005386	8	57572703..57579828	6.5015	1.70774	3.2665	1.66813e-05	0.00042095	0.614454	ENSOMYG00000005386	ENSOMYG00000005386	protein_coding
ASPSCR1_2	17	14385948..14433470	7.3176	1.70758	3.26614	7.93596e-05	0.00144332	1	ENSOMYG00000072704	ENSOMYG00000072704	protein_coding
rell1	21	complement(57907370..57946671)	10.3782	1.70702	3.26486	4.48372e-05	0.000929678	1	ENSOMYG00000077028	ENSOMYG00000077028	protein_coding
kbtbd12	17	complement(54718525..54724286)	53.4967	1.70656	3.26382	0.000179471	0.00275688	1	ENSOMYG00000046541	ENSOMYG00000046541	protein_coding
atg12_2	3	complement(10937454..10941753)	5.19668	1.70588	3.26229	0.000833897	0.00906218	1	ENSOMYG00000063568	ENSOMYG00000063568	protein_coding
zgc:153993_1	6	57851960..57863754	2.93855	1.70567	3.2618	0.000584068	0.00685641	1	ENSOMYG00000001204	ENSOMYG00000001204	protein_coding
gene:ENSOMYG00000007436	4	4742747..4790299	1.52138	1.70462	3.25944	0.00332192	0.0260897	1	ENSOMYG00000007436	ENSOMYG00000007436	protein_coding
gene:ENSOMYG00000039251	12	89505908..89595957	1.16957	1.70383	3.25765	7.31581e-06	0.000215846	0.269478	ENSOMYG00000039251	ENSOMYG00000039251	protein_coding
HECTD2_3	20	12862131..12894496	2.52181	1.70345	3.25678	6.42193e-05	0.00123036	1	ENSOMYG00000017106	ENSOMYG00000017106	protein_coding
serac1	4	complement(24154659..24162382)	2.94383	1.70308	3.25595	0.000173391	0.00267617	1	ENSOMYG00000020486	ENSOMYG00000020486	protein_coding
gene:ENSOMYG00000020007	4	7441311..7533936	1.65006	1.70234	3.25428	1.76909e-05	0.000439584	0.651645	ENSOMYG00000020007	ENSOMYG00000020007	protein_coding
d2hgdh_1	7	16431726..16435931	5.92567	1.7023	3.25418	4.32991e-06	0.000140802	0.159492	ENSOMYG00000006336	ENSOMYG00000006336	protein_coding
cish_2	17	79353104..79355064	17.3178	1.69985	3.24866	0.00204795	0.0180682	1	ENSOMYG00000012577	ENSOMYG00000012577	protein_coding
gene:ENSOMYG00000010317	11	complement(57034718..57039091)	12.5203	1.69952	3.24792	3.7078e-05	0.00080279	1	ENSOMYG00000010317	ENSOMYG00000010317	protein_coding
gene:ENSOMYG00000063523	5	93939828..94018380	26.8538	1.69911	3.24702	1.37118e-05	0.000358081	0.505073	ENSOMYG00000063523	ENSOMYG00000063523	protein_coding
gene:ENSOMYG00000003583	1	complement(68143880..68148492)	2.899	1.69683	3.24188	6.86794e-05	0.00129247	1	ENSOMYG00000003583	ENSOMYG00000003583	protein_coding
AKAP11_2	22	complement(29749040..29771571)	4.27927	1.69409	3.23572	1.84681e-05	0.000453704	0.680271	ENSOMYG00000033040	ENSOMYG00000033040	protein_coding
TMC6	17	complement(13459864..13489398)	1.69525	1.69405	3.23565	0.000398103	0.00516377	1	ENSOMYG00000075433	ENSOMYG00000075433	protein_coding
armh3_2	17	14781111..14845819	16.7879	1.694	3.23553	5.31022e-05	0.00105714	1	ENSOMYG00000077014	ENSOMYG00000077014	protein_coding
gene:ENSOMYG00000017687	22	complement(15026478..15035088)	4.84759	1.69398	3.23548	0.00748156	0.0473752	1	ENSOMYG00000017687	ENSOMYG00000017687	protein_coding
gene:ENSOMYG00000025546	1	complement(35895877..35914028)	4.63682	1.69296	3.23318	0.000746932	0.00827821	1	ENSOMYG00000025546	ENSOMYG00000025546	protein_coding
gene:ENSOMYG00000074181	17	9235851..9247086	2.24065	1.69255	3.23228	0.00188622	0.016899	1	ENSOMYG00000074181	ENSOMYG00000074181	protein_coding
gene:ENSOMYG00000045218	31	complement(20994728..20998974)	1.39257	1.69228	3.23167	0.00414682	0.0307116	1	ENSOMYG00000045218	ENSOMYG00000045218	protein_coding
gene:ENSOMYG00000056442	26	complement(1723918..1784797)	30.7793	1.6921	3.23128	9.16769e-05	0.00163159	1	ENSOMYG00000056442	ENSOMYG00000056442	protein_coding
scamp2l_1	6	complement(86974699..86980427)	2.58137	1.69201	3.23107	0.00129924	0.0127041	1	ENSOMYG00000061258	ENSOMYG00000061258	protein_coding
lrrc14b	18	complement(58874309..58877411)	119.835	1.69116	3.22916	0.000449319	0.00562742	1	ENSOMYG00000007172	ENSOMYG00000007172	protein_coding
cish_1	7	complement(43487094..43490876)	21.0469	1.69071	3.22815	3.09341e-05	0.000693349	1	ENSOMYG00000012251	ENSOMYG00000012251	protein_coding
unk	20	8392576..8401544	2.91438	1.68993	3.22641	6.39591e-06	0.000194335	0.235593	ENSOMYG00000011844	ENSOMYG00000011844	protein_coding
gene:ENSOMYG00000037643	25	36120757..36150415	3.95344	1.68863	3.2235	1.44767e-05	0.000373083	0.53325	ENSOMYG00000037643	ENSOMYG00000037643	protein_coding
tmem102_2	21	44462244..44477146	9.92307	1.68816	3.22245	1.97402e-05	0.000480063	0.727132	ENSOMYG00000036866	ENSOMYG00000036866	protein_coding
mul1b_2	16	complement(43823512..43829700)	6.33431	1.68802	3.22213	8.72639e-06	0.000245787	0.321436	ENSOMYG00000019215	ENSOMYG00000019215	protein_coding
gene:ENSOMYG00000032357	25	complement(23746789..23755574)	11.0212	1.68742	3.2208	9.96588e-06	0.000276719	0.367093	ENSOMYG00000032357	ENSOMYG00000032357	protein_coding
gene:ENSOMYG00000007151	16	22346715..22353948	44.1765	1.68647	3.21868	6.41619e-05	0.00123036	1	ENSOMYG00000007151	ENSOMYG00000007151	protein_coding
gene:ENSOMYG00000018864	32	19467688..19537428	5.22899	1.68642	3.21856	7.91358e-06	0.00022948	0.291497	ENSOMYG00000018864	ENSOMYG00000018864	protein_coding
gene:ENSOMYG00000018790	4	22674526..22683127	3.36785	1.68559	3.21672	0.000786788	0.00862385	1	ENSOMYG00000018790	ENSOMYG00000018790	protein_coding
igfbp6	9	complement(64360207..64363176)	5.13063	1.68551	3.21654	0.000785412	0.00861248	1	ENSOMYG00000022473	ENSOMYG00000022473	protein_coding
lmbrd2a	6	complement(8988935..9003182)	3.301	1.68461	3.21453	2.55932e-05	0.000594033	0.942726	ENSOMYG00000006085	ENSOMYG00000006085	protein_coding
gene:ENSOMYG00000071148	25	complement(25652799..25655017)	1.65797	1.68455	3.2144	0.00171446	0.0157311	1	ENSOMYG00000071148	ENSOMYG00000071148	protein_coding
gene:ENSOMYG00000059525	9	complement(4063224..4183509)	2.31912	1.68411	3.21342	2.48951e-05	0.000582609	0.917011	ENSOMYG00000059525	ENSOMYG00000059525	protein_coding
DOK7_1	9	24969758..25017804	15.0338	1.6834	3.21184	2.46759e-05	0.000578544	0.908939	ENSOMYG00000005849	ENSOMYG00000005849	protein_coding
usf1_1	24	12087048..12092541	8.91821	1.68217	3.2091	7.03981e-06	0.000209402	0.259312	ENSOMYG00000061570	ENSOMYG00000061570	protein_coding
gnptg	16	20791954..20798137	3.3917	1.68035	3.20506	0.00040352	0.0052181	1	ENSOMYG00000021941	ENSOMYG00000021941	protein_coding
cad_2	8	complement(23928940..23953133)	14.1428	1.68016	3.20463	0.000378826	0.00496432	1	ENSOMYG00000018741	ENSOMYG00000018741	protein_coding
cdkn1bb_1	2	62734369..62736639	66.2329	1.6784	3.20073	0.000418653	0.00535128	1	ENSOMYG00000022096	ENSOMYG00000022096	protein_coding
arfrp1_1	7	complement(77349767..77353969)	29.6177	1.67785	3.19951	2.63064e-05	0.000607816	0.968996	ENSOMYG00000014719	ENSOMYG00000014719	protein_coding
CLN6_2	6	complement(87711264..87720199)	4.94138	1.67725	3.19817	7.27214e-05	0.00135057	1	ENSOMYG00000001458	ENSOMYG00000001458	protein_coding
zfand1	15	29405356..29415108	13.3194	1.67674	3.19704	1.07386e-05	0.000294957	0.395555	ENSOMYG00000021876	ENSOMYG00000021876	protein_coding
GPS1_1	20	24021067..24028890	28.5216	1.6761	3.19563	0.000107705	0.00184548	1	ENSOMYG00000035733	ENSOMYG00000035733	protein_coding
rpl3_1	12	complement(81190010..81193680)	440.937	1.6761	3.19562	6.95836e-05	0.00130179	1	ENSOMYG00000010582	ENSOMYG00000010582	protein_coding
crtac1a_2	17	complement(14025233..14036834)	22.0612	1.67463	3.19238	0.000303403	0.0041826	1	ENSOMYG00000032014	ENSOMYG00000032014	protein_coding
scpep1_1	12	97746355..97764025	15.303	1.67414	3.19129	3.79951e-05	0.00081847	1	ENSOMYG00000014864	ENSOMYG00000014864	protein_coding
ogfod2_1	6	complement(37341914..37343815)	2.60063	1.67282	3.18836	0.00261626	0.0217484	1	ENSOMYG00000015943	ENSOMYG00000015943	protein_coding
gene:ENSOMYG00000040952	28	994393..1004252	13.1258	1.67272	3.18814	8.17154e-06	0.000234378	0.300999	ENSOMYG00000040952	ENSOMYG00000040952	protein_coding
vps33b_1	6	82308628..82330565	6.48604	1.67124	3.18488	2.92893e-06	0.000101999	0.107887	ENSOMYG00000017604	ENSOMYG00000017604	protein_coding
gene:ENSOMYG00000001005	1	90877079..90911279	37.591	1.67105	3.18445	0.0001366	0.0022262	1	ENSOMYG00000001005	ENSOMYG00000001005	protein_coding
gene:ENSOMYG00000008858	9	72042803..72050286	17.9331	1.66965	3.18138	2.71408e-06	9.58475e-05	0.0999733	ENSOMYG00000008858	ENSOMYG00000008858	protein_coding
TMEM38B_2	12	complement(11425055..11456931)	3.41373	1.66887	3.17965	0.0021735	0.0188621	1	ENSOMYG00000017086	ENSOMYG00000017086	protein_coding
gene:ENSOMYG00000003514	11	83635114..83694112	49.8209	1.66855	3.17895	0.000287721	0.00400764	1	ENSOMYG00000003514	ENSOMYG00000003514	protein_coding
gene:ENSOMYG00000035953	14	complement(35589641..35591899)	87.6814	1.66832	3.17844	5.25687e-05	0.00104981	1	ENSOMYG00000035953	ENSOMYG00000035953	protein_coding
gene:ENSOMYG00000002551	6	complement(88700609..88784113)	75.8943	1.66821	3.1782	5.13392e-05	0.00102929	1	ENSOMYG00000002551	ENSOMYG00000002551	protein_coding
SIX1_2	25	complement(22498169..22500119)	78.807	1.66785	3.17741	2.89615e-05	0.000658997	1	ENSOMYG00000023542	ENSOMYG00000023542	protein_coding
gene:ENSOMYG00000002175	8	75982041..75996492	4.73225	1.66556	3.17237	6.96476e-05	0.00130203	1	ENSOMYG00000002175	ENSOMYG00000002175	protein_coding
si:ch211-14a17.11	8	74891253..74891998	10.249	1.6648	3.17069	0.000102966	0.00178218	1	ENSOMYG00000024229	ENSOMYG00000024229	protein_coding
gene:ENSOMYG00000012662	17	complement(56594949..56598472)	3.80506	1.66441	3.16984	0.0018757	0.0168285	1	ENSOMYG00000012662	ENSOMYG00000012662	protein_coding
gene:ENSOMYG00000030580	24	9408860..9437591	2.01477	1.66371	3.1683	4.73544e-05	0.00097237	1	ENSOMYG00000030580	ENSOMYG00000030580	protein_coding
gene:ENSOMYG00000068634	23	8959108..8990653	1.2114	1.66283	3.16637	0.000756411	0.00835201	1	ENSOMYG00000068634	ENSOMYG00000068634	protein_coding
ZRANB1_3	23	complement(25886078..25927201)	5.22157	1.66275	3.16619	2.14543e-05	0.000512447	0.790267	ENSOMYG00000045704	ENSOMYG00000045704	protein_coding
CAAP1	21	58512845..58523630	6.55923	1.66253	3.16572	3.98798e-05	0.000851147	1	ENSOMYG00000025636	ENSOMYG00000025636	protein_coding
gene:ENSOMYG00000030235	5	complement(71163649..71209328)	2.42259	1.66236	3.16535	1.93324e-05	0.000472402	0.71211	ENSOMYG00000030235	ENSOMYG00000030235	protein_coding
gene:ENSOMYG00000006418	21	complement(23697861..23710321)	13.1453	1.66175	3.16401	1.31481e-05	0.000345845	0.484312	ENSOMYG00000006418	ENSOMYG00000006418	protein_coding
gene:ENSOMYG00000017581	17	complement(63554210..63558933)	1.78215	1.66143	3.1633	0.00564607	0.0386614	1	ENSOMYG00000017581	ENSOMYG00000017581	protein_coding
ALG14_2	15	6997386..7002080	3.42515	1.66118	3.16275	8.80377e-05	0.00157417	1	ENSOMYG00000018306	ENSOMYG00000018306	protein_coding
GOSR1	24	16324528..16389502	7.54856	1.66114	3.16267	4.7998e-05	0.000981627	1	ENSOMYG00000022047	ENSOMYG00000022047	protein_coding
btg1_1	15	complement(63131440..63136022)	47.3273	1.66111	3.16259	3.51654e-05	0.000767908	1	ENSOMYG00000034979	ENSOMYG00000034979	protein_coding
acta2_2	20	complement(12619680..12625128)	100.114	1.65906	3.1581	6.24704e-05	0.0012041	1	ENSOMYG00000016388	ENSOMYG00000016388	protein_coding
gene:ENSOMYG00000002565	8	complement(5364994..5450011)	4.19829	1.65835	3.15655	2.51146e-05	0.000587005	0.925097	ENSOMYG00000002565	ENSOMYG00000002565	protein_coding
gene:ENSOMYG00000000288	3	complement(78112391..78138670)	1.69296	1.65807	3.15594	0.000818634	0.00892679	1	ENSOMYG00000000288	ENSOMYG00000000288	protein_coding
gene:ENSOMYG00000014545	19	50527025..50528577	8.1821	1.65711	3.15383	0.000718614	0.00803926	1	ENSOMYG00000014545	ENSOMYG00000014545	protein_coding
gene:ENSOMYG00000076742	2	21837100..21838551	10.0851	1.65697	3.15354	1.70283e-05	0.000427168	0.627239	ENSOMYG00000076742	ENSOMYG00000076742	protein_coding
TRIP10_2	17	complement(8497855..8546213)	2.23674	1.65688	3.15335	0.000309802	0.00424781	1	ENSOMYG00000064334	ENSOMYG00000064334	protein_coding
BNIP1_1	10	10983536..10985879	22.7794	1.65528	3.14983	0.000204046	0.00304821	1	ENSOMYG00000031293	ENSOMYG00000031293	protein_coding
gene:ENSOMYG00000010219	12	complement(87281039..87300404)	0.82749	1.65413	3.14734	0.00122349	0.0122024	1	ENSOMYG00000010219	ENSOMYG00000010219	protein_coding
nupr1a	10	complement(6403877..6404110)	584.827	1.65325	3.14542	0.000124113	0.00206817	1	ENSOMYG00000012264	ENSOMYG00000012264	protein_coding
gene:ENSOMYG00000051573	12	101351904..101360219	1.22645	1.65232	3.14338	0.00494133	0.0350951	1	ENSOMYG00000051573	ENSOMYG00000051573	protein_coding
gene:ENSOMYG00000072856	26	complement(4440695..4503744)	3.73706	1.65224	3.14321	0.000209575	0.00311148	1	ENSOMYG00000072856	ENSOMYG00000072856	protein_coding
gene:ENSOMYG00000075468	17	complement(4676171..4763346)	20.2147	1.65224	3.14321	1.83152e-05	0.000451007	0.674641	ENSOMYG00000075468	ENSOMYG00000075468	protein_coding
gene:ENSOMYG00000069049	19	38185072..38191051	35.1559	1.6519	3.14248	4.62084e-05	0.000952679	1	ENSOMYG00000069049	ENSOMYG00000069049	protein_coding
TXLNB_2	8	complement(22532732..22554314)	1048.93	1.6486	3.13529	0.00012175	0.00204216	1	ENSOMYG00000047651	ENSOMYG00000047651	protein_coding
gene:ENSOMYG00000011010	4	complement(11120262..11163091)	5.84752	1.64754	3.13299	0.000301827	0.00416764	1	ENSOMYG00000011010	ENSOMYG00000011010	protein_coding
acbd4	16	complement(25713533..25716131)	2.56887	1.64621	3.1301	0.00259823	0.0216126	1	ENSOMYG00000037002	ENSOMYG00000037002	protein_coding
gene:ENSOMYG00000002388	1	complement(32398316..32411146)	12.6433	1.64579	3.1292	5.18721e-06	0.000165096	0.191071	ENSOMYG00000002388	ENSOMYG00000002388	protein_coding
tfe3b_1	7	complement(47434012..47445095)	13.2021	1.64565	3.12888	5.58371e-06	0.000174874	0.205676	ENSOMYG00000022308	ENSOMYG00000022308	protein_coding
lipe1	23	complement(41033661..41041025)	4.46362	1.64536	3.12826	1.35437e-05	0.000354784	0.498882	ENSOMYG00000046603	ENSOMYG00000046603	protein_coding
yipf2_1	12	84337483..84340813	4.45657	1.64535	3.12824	4.34084e-05	0.000907443	1	ENSOMYG00000013541	ENSOMYG00000013541	protein_coding
eci2_1	11	complement(32298408..32315392)	5.15939	1.64483	3.12711	2.05754e-05	0.000494235	0.757894	ENSOMYG00000012594	ENSOMYG00000012594	protein_coding
gene:ENSOMYG00000040086	8	complement(61117699..61139308)	1.71371	1.6444	3.12618	0.000355673	0.00472906	1	ENSOMYG00000040086	ENSOMYG00000040086	protein_coding
gene:ENSOMYG00000038493	23	complement(44523293..44645833)	0.926916	1.64276	3.12263	0.00113092	0.0114815	1	ENSOMYG00000038493	ENSOMYG00000038493	protein_coding
gene:ENSOMYG00000032968	12	complement(79103719..79106137)	8.17808	1.64246	3.12198	3.08503e-05	0.00069269	1	ENSOMYG00000032968	ENSOMYG00000032968	protein_coding
gene:ENSOMYG00000063528	32	complement(41019920..41048202)	1.6095	1.64183	3.12061	0.00143444	0.013767	1	ENSOMYG00000063528	ENSOMYG00000063528	protein_coding
gene:ENSOMYG00000014785	15	61194540..61202410	9.76122	1.64083	3.11846	6.84081e-05	0.00128927	1	ENSOMYG00000014785	ENSOMYG00000014785	protein_coding
gene:ENSOMYG00000036708	17	complement(50336599..50367886)	16.3512	1.64064	3.11803	7.684e-05	0.00140958	1	ENSOMYG00000036708	ENSOMYG00000036708	protein_coding
ndel1b	12	complement(99968983..99980292)	21.3465	1.6405	3.11773	1.74793e-05	0.000435905	0.643851	ENSOMYG00000008231	ENSOMYG00000008231	protein_coding
NDFIP1	12	52855902..52860593	8.28222	1.63914	3.1148	0.000527316	0.00632385	1	ENSOMYG00000010267	ENSOMYG00000010267	protein_coding
LY75_1	7	complement(21046222..21080011)	1.83895	1.63792	3.11217	1.4791e-05	0.000379647	0.544828	ENSOMYG00000015093	ENSOMYG00000015093	protein_coding
tfe3a_2	16	75314298..75367468	3.46123	1.63792	3.11217	0.000101281	0.0017639	1	ENSOMYG00000049159	ENSOMYG00000049159	protein_coding
DCAF15_1	13	complement(4057361..4098642)	3.69328	1.63776	3.11182	0.000145641	0.00234259	1	ENSOMYG00000059287	ENSOMYG00000059287	protein_coding
gene:ENSOMYG00000036668	25	42684715..42700527	12.0666	1.63651	3.10912	1.79494e-05	0.000443715	0.661165	ENSOMYG00000036668	ENSOMYG00000036668	protein_coding
st7l_1	7	41485859..41498420	2.79278	1.63633	3.10874	0.000426233	0.00540077	1	ENSOMYG00000004165	ENSOMYG00000004165	protein_coding
mettl25b	2	complement(32593905..32596968)	3.20706	1.63615	3.10836	0.000174856	0.00269339	1	ENSOMYG00000000383	ENSOMYG00000000383	protein_coding
gene:ENSOMYG00000039541	5	28829745..28835929	339.219	1.63601	3.10805	0.000198935	0.00298631	1	ENSOMYG00000039541	ENSOMYG00000039541	protein_coding
gene:ENSOMYG00000012447	15	16095043..16113728	5.51619	1.63335	3.10232	2.36122e-05	0.000556679	0.869754	ENSOMYG00000012447	ENSOMYG00000012447	protein_coding
trim105	31	310054..326028	5.90898	1.6329	3.10135	1.80758e-05	0.000446048	0.665823	ENSOMYG00000035533	ENSOMYG00000035533	protein_coding
CRH_2	28	complement(23211468..23211980)	6.50682	1.63135	3.09803	0.00541994	0.0374701	1	ENSOMYG00000034555	ENSOMYG00000034555	protein_coding
gene:ENSOMYG00000074482	26	complement(7068858..7087301)	24.0129	1.63048	3.09617	3.2283e-05	0.000717896	1	ENSOMYG00000074482	ENSOMYG00000074482	protein_coding
gene:ENSOMYG00000041827	5	12802997..12978036	2.37695	1.62986	3.09482	0.000627413	0.00723515	1	ENSOMYG00000041827	ENSOMYG00000041827	protein_coding
gene:ENSOMYG00000077581	14	42892286..42922577	6.31244	1.6297	3.09448	1.50813e-05	0.000385929	0.555518	ENSOMYG00000077581	ENSOMYG00000077581	protein_coding
hsf2_1	4	complement(16470658..16474023)	2.97063	1.62954	3.09414	0.000789204	0.0086466	1	ENSOMYG00000000568	ENSOMYG00000000568	protein_coding
dnajb9a_2	2	94145555..94149013	4.34623	1.62944	3.09392	5.06387e-05	0.00102006	1	ENSOMYG00000063751	ENSOMYG00000063751	protein_coding
zgc:193801	5	complement(24662509..24679136)	2.72633	1.62918	3.09338	0.000531232	0.00636229	1	ENSOMYG00000013793	ENSOMYG00000013793	protein_coding
castor2_1	10	18986733..19002361	7.53614	1.62802	3.09088	0.000215807	0.00318174	1	ENSOMYG00000032718	ENSOMYG00000032718	protein_coding
gene:ENSOMYG00000062350	26	7750913..7760684	88.8736	1.62787	3.09056	0.0015132	0.0143556	1	ENSOMYG00000062350	ENSOMYG00000062350	protein_coding
cuedc1b_2	27	complement(27451885..27497690)	2.97694	1.62755	3.08987	0.000685273	0.0077514	1	ENSOMYG00000032761	ENSOMYG00000032761	protein_coding
fnta_1	14	complement(19737751..19753121)	10.6028	1.62566	3.08583	7.53503e-05	0.00138625	1	ENSOMYG00000035581	ENSOMYG00000035581	protein_coding
napepld_1	15	complement(65878617..65885531)	8.26287	1.62522	3.08489	0.000386287	0.00504134	1	ENSOMYG00000023821	ENSOMYG00000023821	protein_coding
gene:ENSOMYG00000044741	7	complement(71416141..71419252)	6.16248	1.62507	3.08458	0.00804617	0.0498322	1	ENSOMYG00000044741	ENSOMYG00000044741	protein_coding
gene:ENSOMYG00000017425	11	61709953..61742353	2.16714	1.62426	3.08284	0.0014239	0.0136812	1	ENSOMYG00000017425	ENSOMYG00000017425	protein_coding
WIPI1_2	23	complement(50053352..50067462)	6.13944	1.62406	3.0824	0.000363237	0.00480453	1	ENSOMYG00000024931	ENSOMYG00000024931	protein_coding
gene:ENSOMYG00000012121	14	29956770..29965522	20.2984	1.62271	3.07954	4.92302e-06	0.000157277	0.181339	ENSOMYG00000012121	ENSOMYG00000012121	protein_coding
gene:ENSOMYG00000052030	28	complement(27035317..27046429)	2.01814	1.62265	3.0794	0.00273476	0.0224766	1	ENSOMYG00000052030	ENSOMYG00000052030	protein_coding
PSMD12_2	17	complement(31341525..31348203)	110.398	1.62246	3.07899	0.00099984	0.0104981	1	ENSOMYG00000016336	ENSOMYG00000016336	protein_coding
gene:ENSOMYG00000008904	7	complement(13615930..13675190)	1.74346	1.62239	3.07884	6.87832e-05	0.00129347	1	ENSOMYG00000008904	ENSOMYG00000008904	protein_coding
gene:ENSOMYG00000007593	16	22369537..22475325	17.4523	1.62205	3.07812	4.42187e-05	0.00092211	1	ENSOMYG00000007593	ENSOMYG00000007593	protein_coding
tmem184c_2	19	11540955..11547800	3.73603	1.62166	3.07729	3.63137e-05	0.000790273	1	ENSOMYG00000011983	ENSOMYG00000011983	protein_coding
lepr_1	5	complement(86087584..86174510)	3.35224	1.62046	3.07472	0.000104582	0.00180046	1	ENSOMYG00000007753	ENSOMYG00000007753	protein_coding
castor2_2	12	complement(46323662..46343130)	12.6125	1.61956	3.0728	0.000139414	0.00226243	1	ENSOMYG00000014267	ENSOMYG00000014267	protein_coding
gene:ENSOMYG00000005646	7	16269901..16276455	14.6451	1.61909	3.07182	0.000353485	0.00470243	1	ENSOMYG00000005646	ENSOMYG00000005646	protein_coding
gene:ENSOMYG00000069938	13	68066057..68079418	6.05877	1.61874	3.07107	4.7195e-05	0.000969877	1	ENSOMYG00000069938	ENSOMYG00000069938	protein_coding
HBP1_3	21	30003494..30010308	6.45742	1.61789	3.06925	4.18141e-05	0.000881351	1	ENSOMYG00000045282	ENSOMYG00000045282	protein_coding
DEPDC5	5	complement(35710754..35739476)	15.1202	1.61685	3.06704	0.000410191	0.00528023	1	ENSOMYG00000039374	ENSOMYG00000039374	protein_coding
rdh8a_1	12	74412057..74421446	1.55583	1.61527	3.06369	0.00579271	0.0393851	1	ENSOMYG00000041589	ENSOMYG00000041589	protein_coding
fam149b1_1	1	complement(76444914..76451703)	2.16778	1.61435	3.06173	0.000214512	0.00316596	1	ENSOMYG00000028567	ENSOMYG00000028567	protein_coding
gene:ENSOMYG00000057533	15	complement(26514889..26527965)	3.10913	1.61411	3.06123	0.00627553	0.0416765	1	ENSOMYG00000057533	ENSOMYG00000057533	protein_coding
gene:ENSOMYG00000019427	1	complement(70772690..70820051)	2.1158	1.61381	3.06059	0.00022998	0.00334646	1	ENSOMYG00000019427	ENSOMYG00000019427	protein_coding
gene:ENSOMYG00000018228	16	37779525..37793900	2.14583	1.61317	3.05923	0.000541222	0.00646066	1	ENSOMYG00000018228	ENSOMYG00000018228	protein_coding
gene:ENSOMYG00000028224	5	complement(100672506..100721808)	1.05272	1.61219	3.05715	0.00057747	0.00679462	1	ENSOMYG00000028224	ENSOMYG00000028224	protein_coding
nudt19_2	26	complement(1968213..1972990)	2.34885	1.61188	3.05651	0.00605835	0.040669	1	ENSOMYG00000075305	ENSOMYG00000075305	protein_coding
gene:ENSOMYG00000027833	9	complement(10674451..10690471)	7.44857	1.61162	3.05595	6.18511e-05	0.0011967	1	ENSOMYG00000027833	ENSOMYG00000027833	protein_coding
sesn1_1	4	26686424..26753679	90.7722	1.6109	3.05443	0.0031243	0.0248441	1	ENSOMYG00000008399	ENSOMYG00000008399	protein_coding
plekhh1_1	19	complement(28207423..28254022)	1.97011	1.61032	3.0532	0.000267408	0.00377425	1	ENSOMYG00000028605	ENSOMYG00000028605	protein_coding
gene:ENSOMYG00000071548	28	complement(35834634..35841918)	0.782192	1.60932	3.05108	0.00319636	0.0252987	1	ENSOMYG00000071548	ENSOMYG00000071548	protein_coding
rfc1_1	10	complement(82631870..82698968)	4.55224	1.60931	3.05106	6.16282e-05	0.00119329	1	ENSOMYG00000059191	ENSOMYG00000059191	protein_coding
gene:ENSOMYG00000046230	28	2837510..2887834	2.15496	1.60867	3.04971	0.00262871	0.0218305	1	ENSOMYG00000046230	ENSOMYG00000046230	protein_coding
qrich1_1	7	complement(71440528..71451216)	2.92974	1.60766	3.04757	5.77801e-05	0.00113256	1	ENSOMYG00000044757	ENSOMYG00000044757	protein_coding
dhcr7	6	58151614..58157819	4.18581	1.60694	3.04606	9.38019e-05	0.00166091	1	ENSOMYG00000001733	ENSOMYG00000001733	protein_coding
gene:ENSOMYG00000049085	Y	12115775..12125865	10.5243	1.60578	3.0436	3.94004e-05	0.000843745	1	ENSOMYG00000049085	ENSOMYG00000049085	protein_coding
ptdss1a	2	6653077..6682679	62.4276	1.60462	3.04115	0.000143452	0.00231469	1	ENSOMYG00000060521	ENSOMYG00000060521	protein_coding
XPO1_1	1	87956265..88022737	4.50149	1.60408	3.04001	8.04628e-05	0.00146026	1	ENSOMYG00000062205	ENSOMYG00000062205	protein_coding
herpud1_2	2	complement(69253304..69265304)	3.67667	1.60374	3.03931	0.000947887	0.0100563	1	ENSOMYG00000021137	ENSOMYG00000021137	protein_coding
gene:ENSOMYG00000073227	21	complement(9262937..9276999)	5.91226	1.60328	3.03833	0.00016587	0.00257838	1	ENSOMYG00000073227	ENSOMYG00000073227	protein_coding
SLC43A2_2	27	10393411..10413161	6.12688	1.60323	3.03822	0.000184084	0.00281341	1	ENSOMYG00000045499	ENSOMYG00000045499	protein_coding
gene:ENSOMYG00000008104	2	complement(94100597..94140568)	2.79512	1.60318	3.03813	5.92709e-05	0.00115556	1	ENSOMYG00000008104	ENSOMYG00000008104	protein_coding
ifngr1l	20	complement(27642243..27660278)	6.26348	1.60318	3.03812	3.96018e-05	0.000846634	1	ENSOMYG00000041960	ENSOMYG00000041960	protein_coding
gene:ENSOMYG00000055930	9	complement(3345851..3407783)	0.673267	1.60209	3.03582	0.00172767	0.0158009	1	ENSOMYG00000055930	ENSOMYG00000055930	protein_coding
pagr1	16	28051872..28081246	9.23577	1.60193	3.03549	6.41884e-05	0.00123036	1	ENSOMYG00000045449	ENSOMYG00000045449	protein_coding
gps2	10	complement(50402807..50440197)	12.2941	1.60142	3.03443	5.14603e-06	0.00016399	0.189554	ENSOMYG00000023625	ENSOMYG00000023625	protein_coding
gene:ENSOMYG00000019560	13	44742224..44748335	27.0773	1.60081	3.03314	0.00216773	0.0188526	1	ENSOMYG00000019560	ENSOMYG00000019560	protein_coding
maff_2	23	complement(47452428..47453001)	10.7521	1.59999	3.03142	0.00119462	0.0119848	1	ENSOMYG00000066190	ENSOMYG00000066190	protein_coding
gene:ENSOMYG00000022703	22	44452790..44463025	3.48437	1.5995	3.03039	0.000238427	0.00344152	1	ENSOMYG00000022703	ENSOMYG00000022703	protein_coding
smarcc1b_1	18	53675446..53700953	24.3039	1.59863	3.02856	9.8779e-05	0.00172979	1	ENSOMYG00000044640	ENSOMYG00000044640	protein_coding
maf1a	17	complement(56456470..56460297)	3.98998	1.59812	3.02748	0.000691134	0.00779347	1	ENSOMYG00000008734	ENSOMYG00000008734	protein_coding
znf395b_1	4	40650598..40672830	7.13321	1.59774	3.02669	0.000121489	0.00204048	1	ENSOMYG00000028442	ENSOMYG00000028442	protein_coding
gene:ENSOMYG00000035679	9	78500150..78511144	10.8692	1.5961	3.02325	0.000220746	0.00323583	1	ENSOMYG00000035679	ENSOMYG00000035679	protein_coding
gene:ENSOMYG00000006011	13	complement(52733596..52742239)	2.54314	1.59562	3.02223	0.000238006	0.00343933	1	ENSOMYG00000006011	ENSOMYG00000006011	protein_coding
gene:ENSOMYG00000056994	21	complement(44057140..44090780)	3.65195	1.59534	3.02166	1.68247e-05	0.000423729	0.619737	ENSOMYG00000056994	ENSOMYG00000056994	protein_coding
gene:ENSOMYG00000038499	1	complement(92867604..92939906)	0.64955	1.59509	3.02113	0.000462126	0.00575408	1	ENSOMYG00000038499	ENSOMYG00000038499	protein_coding
gene:ENSOMYG00000007430	7	67122786..67129883	73.0517	1.5942	3.01927	0.000276637	0.00387444	1	ENSOMYG00000007430	ENSOMYG00000007430	protein_coding
gene:ENSOMYG00000021549	7	complement(47346386..47357047)	24.4146	1.59381	3.01845	2.27295e-05	0.000538362	0.837242	ENSOMYG00000021549	ENSOMYG00000021549	protein_coding
gene:ENSOMYG00000074084	17	complement(7380588..7416572)	4.326	1.5935	3.01781	1.85976e-05	0.000456198	0.685044	ENSOMYG00000074084	ENSOMYG00000074084	protein_coding
gene:ENSOMYG00000020872	13	complement(22768820..22834502)	4.95295	1.59321	3.01719	1.60518e-05	0.000407489	0.591269	ENSOMYG00000020872	ENSOMYG00000020872	protein_coding
hps3_2	30	43104766..43126445	1.4895	1.59272	3.01617	0.000747126	0.00827821	1	ENSOMYG00000022409	ENSOMYG00000022409	protein_coding
PIK3C2B_1	7	69737051..69793015	2.55862	1.59166	3.01395	2.5129e-05	0.000587005	0.925628	ENSOMYG00000041486	ENSOMYG00000041486	protein_coding
MSL3_1	7	complement(18385368..18401654)	3.02874	1.59047	3.01147	2.40295e-05	0.000564948	0.885126	ENSOMYG00000046329	ENSOMYG00000046329	protein_coding
angptl4_2	28	complement(30400859..30416518)	12.6676	1.58975	3.00997	6.06224e-05	0.0011792	1	ENSOMYG00000041379	ENSOMYG00000041379	protein_coding
DDA1_2	8	53674745..53678132	4.42304	1.58833	3.00702	0.00223974	0.0192989	1	ENSOMYG00000011174	ENSOMYG00000011174	protein_coding
gene:ENSOMYG00000044593	Y	complement(36474501..36484226)	23.2795	1.58614	3.00245	7.6744e-05	0.00140884	1	ENSOMYG00000044593	ENSOMYG00000044593	protein_coding
gene:ENSOMYG00000003727	12	79469955..79542676	1.57635	1.58571	3.00155	0.00449851	0.0326421	1	ENSOMYG00000003727	ENSOMYG00000003727	protein_coding
smo_1	15	complement(69166979..69181463)	2.36108	1.58535	3.00081	0.000825388	0.00899659	1	ENSOMYG00000006735	ENSOMYG00000006735	protein_coding
ephx1_1	4	complement(20478370..20483414)	7.75608	1.58518	3.00046	5.787e-06	0.000179913	0.213164	ENSOMYG00000014629	ENSOMYG00000014629	protein_coding
pdik1l_1	18	complement(49136739..49146550)	1.557	1.58361	2.99719	0.000422257	0.00537844	1	ENSOMYG00000068142	ENSOMYG00000068142	protein_coding
gnpnat1	25	2444451..2448559	5.88554	1.58356	2.99709	0.00271206	0.0223694	1	ENSOMYG00000026717	ENSOMYG00000026717	protein_coding
ABRAXAS2_1	1	complement(75137243..75148718)	4.57975	1.58336	2.99667	0.000238357	0.00344152	1	ENSOMYG00000027121	ENSOMYG00000027121	protein_coding
igf2r_1	4	complement(17846158..17878713)	1.79328	1.58306	2.99604	8.72058e-05	0.00156369	1	ENSOMYG00000009988	ENSOMYG00000009988	protein_coding
snapc1b	19	complement(40342341..40349618)	2.32169	1.58301	2.99595	0.0012276	0.0122235	1	ENSOMYG00000033072	ENSOMYG00000033072	protein_coding
maf1b	15	complement(31368438..31383335)	5.16719	1.58257	2.99503	1.23095e-05	0.000326823	0.453419	ENSOMYG00000028687	ENSOMYG00000028687	protein_coding
agtrap	17	66961116..66966302	1.44854	1.58234	2.99454	0.00532909	0.037023	1	ENSOMYG00000015085	ENSOMYG00000015085	protein_coding
rnf114	16	63438838..63445028	10.2156	1.58203	2.99391	7.20701e-05	0.00133945	1	ENSOMYG00000037438	ENSOMYG00000037438	protein_coding
gene:ENSOMYG00000033787	16	complement(73770184..73773325)	6.35331	1.58144	2.99268	0.000652869	0.00745442	1	ENSOMYG00000033787	ENSOMYG00000033787	protein_coding
aptx	6	10384908..10386345	5.88553	1.58118	2.99215	9.68649e-05	0.00170447	1	ENSOMYG00000009236	ENSOMYG00000009236	protein_coding
PAMR1_2	2	79103714..79150860	6.12418	1.58085	2.99145	0.000281635	0.00393146	1	ENSOMYG00000001139	ENSOMYG00000001139	protein_coding
arrb2a_2	12	30403941..30416487	6.70714	1.58058	2.99091	9.73341e-05	0.00170919	1	ENSOMYG00000031213	ENSOMYG00000031213	protein_coding
ubox5_1	6	40500364..40505849	1.86665	1.57939	2.98843	0.000585487	0.00686356	1	ENSOMYG00000030817	ENSOMYG00000030817	protein_coding
naa30	25	complement(20846927..20849969)	2.66998	1.57787	2.98529	0.00707881	0.0456305	1	ENSOMYG00000020311	ENSOMYG00000020311	protein_coding
DOK7_2	21	50734702..50765869	1.89913	1.57746	2.98445	0.00212257	0.0185466	1	ENSOMYG00000030092	ENSOMYG00000030092	protein_coding
gene:ENSOMYG00000070441	17	21054229..21055527	30.6265	1.57718	2.98386	0.000514904	0.00622048	1	ENSOMYG00000070441	ENSOMYG00000070441	protein_coding
gene:ENSOMYG00000024024	2	complement(101560499..101594993)	11.288	1.57711	2.98371	0.000542691	0.00647517	1	ENSOMYG00000024024	ENSOMYG00000024024	protein_coding
KPNA6_2	32	7527318..7564245	1.79079	1.57696	2.9834	0.000136725	0.0022262	1	ENSOMYG00000060451	ENSOMYG00000060451	protein_coding
eif4ebp3l_1	14	complement(29593985..29685123)	48.8934	1.57658	2.98263	3.84173e-05	0.00082547	1	ENSOMYG00000011863	ENSOMYG00000011863	protein_coding
gene:ENSOMYG00000069895	15	complement(81537800..81554249)	12.5336	1.57638	2.98221	1.84782e-05	0.000453704	0.680643	ENSOMYG00000069895	ENSOMYG00000069895	protein_coding
gene:ENSOMYG00000022487	23	complement(49428898..49477027)	4.74473	1.57607	2.98157	7.77668e-05	0.00142248	1	ENSOMYG00000022487	ENSOMYG00000022487	protein_coding
mmadhca_2	18	8823595..8834828	84.496	1.57587	2.98116	0.00018626	0.00284155	1	ENSOMYG00000034217	ENSOMYG00000034217	protein_coding
gene:ENSOMYG00000021411	20	7014874..7073483	2.18718	1.57541	2.98019	0.000446318	0.00560086	1	ENSOMYG00000021411	ENSOMYG00000021411	protein_coding
gene:ENSOMYG00000061039	16	complement(11825304..11839198)	2.58994	1.57535	2.98008	0.00284232	0.0231736	1	ENSOMYG00000061039	ENSOMYG00000061039	protein_coding
plekhb2	30	complement(20649356..20654980)	21.217	1.57512	2.9796	1.10038e-05	0.000299016	0.405324	ENSOMYG00000020988	ENSOMYG00000020988	protein_coding
FBXL5_2	30	complement(27545812..27559879)	6.87034	1.57496	2.97928	4.4277e-05	0.000922484	1	ENSOMYG00000001178	ENSOMYG00000001178	protein_coding
gene:ENSOMYG00000029482	6	complement(11441362..11449686)	3.05885	1.57407	2.97744	0.00152604	0.0144446	1	ENSOMYG00000029482	ENSOMYG00000029482	protein_coding
mef2b	1	20974527..20982802	6.53566	1.57396	2.9772	0.000237216	0.00343181	1	ENSOMYG00000019090	ENSOMYG00000019090	protein_coding
gene:ENSOMYG00000022104	23	49378531..49402145	36.983	1.57342	2.97609	0.000136448	0.0022262	1	ENSOMYG00000022104	ENSOMYG00000022104	protein_coding
cept1b_1	7	complement(70891496..70908884)	20.0973	1.57253	2.97426	2.7487e-05	0.000631086	1	ENSOMYG00000042284	ENSOMYG00000042284	protein_coding
cnbpb	7	90526588..90562621	15.466	1.57217	2.97352	2.83994e-05	0.000649026	1	ENSOMYG00000059639	ENSOMYG00000059639	protein_coding
SHROOM2_2	18	24177239..24197954	0.827302	1.57207	2.9733	0.00047003	0.00582097	1	ENSOMYG00000014082	ENSOMYG00000014082	protein_coding
gene:ENSOMYG00000044298	11	37225155..37226260	22.1886	1.57191	2.97298	6.12269e-05	0.00118773	1	ENSOMYG00000044298	ENSOMYG00000044298	protein_coding
RS27_1	1	complement(19536427..19538612)	27.7363	1.57138	2.97189	5.81361e-06	0.00018052	0.214144	ENSOMYG00000000946	ENSOMYG00000000946	protein_coding
gene:ENSOMYG00000066154	26	46498948..46501268	1.79561	1.5711	2.9713	0.00153366	0.014506	1	ENSOMYG00000066154	ENSOMYG00000066154	protein_coding
gene:ENSOMYG00000000221	2	complement(42999886..43018635)	13.3768	1.57107	2.97124	0.00030561	0.00420847	1	ENSOMYG00000000221	ENSOMYG00000000221	protein_coding
gene:ENSOMYG00000001586	1	complement(19865877..19870183)	2.08275	1.56998	2.969	0.000801758	0.00876905	1	ENSOMYG00000001586	ENSOMYG00000001586	protein_coding
atp7a_1	14	34548759..34581035	5.5746	1.56993	2.9689	6.69561e-05	0.00127277	1	ENSOMYG00000024304	ENSOMYG00000024304	protein_coding
gene:ENSOMYG00000007416	7	67103022..67111995	11.1077	1.56927	2.96753	9.2215e-05	0.00163851	1	ENSOMYG00000007416	ENSOMYG00000007416	protein_coding
gene:ENSOMYG00000027418	28	complement(7627228..7629740)	15.0261	1.56905	2.9671	1.65457e-05	0.000417942	0.609459	ENSOMYG00000027418	ENSOMYG00000027418	protein_coding
gene:ENSOMYG00000059352	17	complement(2154914..2173702)	1.05247	1.5683	2.96554	0.00115774	0.0116978	1	ENSOMYG00000059352	ENSOMYG00000059352	protein_coding
gene:ENSOMYG00000003108	5	66085678..66106194	1.51524	1.56783	2.96458	0.000476518	0.00586439	1	ENSOMYG00000003108	ENSOMYG00000003108	protein_coding
lamp2_2	31	41142201..41153869	27.2822	1.56754	2.964	0.0001093	0.0018703	1	ENSOMYG00000050632	ENSOMYG00000050632	protein_coding
klc3_1	24	complement(10594820..10601603)	0.743556	1.56742	2.96375	0.00357326	0.0274955	1	ENSOMYG00000037717	ENSOMYG00000037717	protein_coding
gene:ENSOMYG00000004744	3	complement(24565702..24575111)	2.18573	1.56661	2.96209	5.4921e-05	0.00108571	1	ENSOMYG00000004744	ENSOMYG00000004744	protein_coding
gene:ENSOMYG00000026671	28	complement(14953434..14956256)	6.37524	1.56585	2.96052	0.000197825	0.00297344	1	ENSOMYG00000026671	ENSOMYG00000026671	protein_coding
CREB5_1	2	7629778..7706527	1.74293	1.56356	2.95582	0.00291105	0.0236089	1	ENSOMYG00000076901	ENSOMYG00000076901	protein_coding
gene:ENSOMYG00000051591	10	78098075..78140561	3.6732	1.56278	2.95423	0.00437814	0.0320426	1	ENSOMYG00000051591	ENSOMYG00000051591	protein_coding
hsdl1	4	complement(16665921..16667790)	1.29227	1.56276	2.95419	0.00793873	0.049422	1	ENSOMYG00000000631	ENSOMYG00000000631	protein_coding
gene:ENSOMYG00000001509	9	10751376..10770696	17.1086	1.56258	2.95382	0.000175012	0.00269418	1	ENSOMYG00000001509	ENSOMYG00000001509	protein_coding
gene:ENSOMYG00000038373	16	60842762..60858849	12.8206	1.56232	2.95329	2.54202e-05	0.000591095	0.936352	ENSOMYG00000038373	ENSOMYG00000038373	protein_coding
gene:ENSOMYG00000035322	5	82606556..82629773	14.4593	1.56159	2.9518	8.70765e-06	0.000245531	0.320746	ENSOMYG00000035322	ENSOMYG00000035322	protein_coding
pigx	5	66801488..66812485	11.9917	1.56122	2.95104	4.47446e-05	0.000928515	1	ENSOMYG00000077222	ENSOMYG00000077222	protein_coding
gene:ENSOMYG00000047896	17	16591705..16643984	0.791509	1.56077	2.95011	0.00728293	0.0464873	1	ENSOMYG00000047896	ENSOMYG00000047896	protein_coding
gene:ENSOMYG00000016666	28	3391513..3396047	2.40348	1.56009	2.94872	0.0023751	0.0201515	1	ENSOMYG00000016666	ENSOMYG00000016666	protein_coding
gene:ENSOMYG00000012817	11	58692307..58719529	17.9278	1.55944	2.94739	2.23018e-05	0.000529215	0.821486	ENSOMYG00000012817	ENSOMYG00000012817	protein_coding
gene:ENSOMYG00000072421	28	complement(41730392..41734503)	5.45501	1.55911	2.94671	6.39071e-05	0.00122808	1	ENSOMYG00000072421	ENSOMYG00000072421	protein_coding
klf9	6	19839592..19842825	169.724	1.55812	2.94471	0.000247027	0.00353629	1	ENSOMYG00000028743	ENSOMYG00000028743	protein_coding
ctu2_2	26	22472907..22483167	1.50723	1.558	2.94445	0.0047981	0.0342595	1	ENSOMYG00000041336	ENSOMYG00000041336	protein_coding
ACOT9_2	15	complement(14236391..14246959)	10.883	1.55796	2.94437	7.38621e-05	0.00136677	1	ENSOMYG00000010388	ENSOMYG00000010388	protein_coding
gene:ENSOMYG00000011955	14	complement(29722932..29743955)	6.61237	1.5578	2.94406	5.32659e-05	0.00105792	1	ENSOMYG00000011955	ENSOMYG00000011955	protein_coding
CC2D1B	28	40657600..40683596	14.3431	1.55578	2.93992	0.000322143	0.00437929	1	ENSOMYG00000020754	ENSOMYG00000020754	protein_coding
crebl2_1	15	complement(81118616..81119508)	8.69953	1.55533	2.939	0.00246884	0.0208082	1	ENSOMYG00000077326	ENSOMYG00000077326	protein_coding
cln8_1	19	complement(48794855..48800673)	3.58388	1.55481	2.93795	0.00340982	0.0265535	1	ENSOMYG00000005253	ENSOMYG00000005253	protein_coding
MICAL2_2	6	complement(66277158..66306988)	34.8322	1.55461	2.93754	0.000418161	0.00534767	1	ENSOMYG00000045362	ENSOMYG00000045362	protein_coding
gene:ENSOMYG00000008820	16	complement(19312863..19323845)	2.32509	1.55436	2.93704	0.000162391	0.0025398	1	ENSOMYG00000008820	ENSOMYG00000008820	protein_coding
hsbp1b_2	2	67486291..67487519	27.6609	1.55361	2.93551	0.000307383	0.00422602	1	ENSOMYG00000014815	ENSOMYG00000014815	protein_coding
gstz1_1	19	42444144..42448294	2.77146	1.55084	2.92987	0.0022815	0.019599	1	ENSOMYG00000010858	ENSOMYG00000010858	protein_coding
gene:ENSOMYG00000010707	32	complement(37757103..37763552)	17.3333	1.55061	2.92941	8.08635e-06	0.000232912	0.297861	ENSOMYG00000010707	ENSOMYG00000010707	protein_coding
ZNF142	22	complement(19656097..19666858)	2.29245	1.55051	2.9292	0.000151703	0.00240514	1	ENSOMYG00000014477	ENSOMYG00000014477	protein_coding
ptk2ab_1	2	9847421..9983298	9.04726	1.54956	2.92727	0.000452102	0.00565117	1	ENSOMYG00000059920	ENSOMYG00000059920	protein_coding
gene:ENSOMYG00000017928	21	complement(40718595..40734730)	8.1778	1.54882	2.92577	1.3496e-05	0.000353898	0.497125	ENSOMYG00000017928	ENSOMYG00000017928	protein_coding
synm_2	2	70911618..70924817	10.6174	1.54814	2.9244	0.000156026	0.00245685	1	ENSOMYG00000023468	ENSOMYG00000023468	protein_coding
tusc2	17	79383755..79385438	8.28567	1.548	2.92412	0.000260478	0.00369076	1	ENSOMYG00000012742	ENSOMYG00000012742	protein_coding
gene:ENSOMYG00000042448	10	35699600..35703084	1.81138	1.54751	2.92312	0.00106064	0.0109691	1	ENSOMYG00000042448	ENSOMYG00000042448	protein_coding
gene:ENSOMYG00000040503	26	50343920..50367316	2.07017	1.54656	2.92119	4.2901e-05	0.000899049	1	ENSOMYG00000040503	ENSOMYG00000040503	protein_coding
wdr41	5	23237530..23250970	21.6335	1.54574	2.91953	0.000139832	0.00226633	1	ENSOMYG00000003184	ENSOMYG00000003184	protein_coding
LEAP-2A	9	complement(9084024..9087297)	10.2822	1.54562	2.91929	0.00562093	0.0385768	1	ENSOMYG00000056028	ENSOMYG00000056028	protein_coding
gene:ENSOMYG00000043891	27	18992282..19047779	12.2496	1.54502	2.91809	7.53503e-05	0.00138625	1	ENSOMYG00000043891	ENSOMYG00000043891	protein_coding
pacc1	25	complement(44607030..44613186)	3.70379	1.54454	2.91712	0.000678193	0.00769183	1	ENSOMYG00000030728	ENSOMYG00000030728	protein_coding
gene:ENSOMYG00000061419	9	3563024..3579224	7.24158	1.5444	2.91683	3.35726e-05	0.000738828	1	ENSOMYG00000061419	ENSOMYG00000061419	protein_coding
gene:ENSOMYG00000018556	8	77974414..77977428	1.90146	1.54327	2.91454	0.00739754	0.0470294	1	ENSOMYG00000018556	ENSOMYG00000018556	protein_coding
rfxap	Y	40744237..40747333	3.94776	1.54305	2.9141	3.05647e-05	0.000688074	1	ENSOMYG00000058688	ENSOMYG00000058688	protein_coding
FAM83A	2	5228275..5235492	2.00975	1.54294	2.91387	0.00360979	0.0276762	1	ENSOMYG00000071197	ENSOMYG00000071197	protein_coding
gene:ENSOMYG00000006527	21	23711947..23732066	2.59085	1.5408	2.90955	0.000654575	0.00747055	1	ENSOMYG00000006527	ENSOMYG00000006527	protein_coding
gene:ENSOMYG00000032427	25	complement(23762069..23775182)	33.4561	1.53865	2.90522	0.00104337	0.0108302	1	ENSOMYG00000032427	ENSOMYG00000032427	protein_coding
gene:ENSOMYG00000003561	11	complement(52288399..52292822)	3.56956	1.5386	2.90512	0.000660233	0.00752074	1	ENSOMYG00000003561	ENSOMYG00000003561	protein_coding
mcm10	21	26238519..26247744	1.04669	1.53856	2.90503	0.00201718	0.0178648	1	ENSOMYG00000038156	ENSOMYG00000038156	protein_coding
gene:ENSOMYG00000076043	13	complement(3161331..3197673)	4.03177	1.53768	2.90327	8.7673e-05	0.00156985	1	ENSOMYG00000076043	ENSOMYG00000076043	protein_coding
gene:ENSOMYG00000034912	28	37626212..37650886	38.0529	1.53728	2.90246	0.00251477	0.0211115	1	ENSOMYG00000034912	ENSOMYG00000034912	protein_coding
hsf2_2	8	complement(20477413..20483874)	2.45771	1.53705	2.902	0.00216943	0.0188526	1	ENSOMYG00000046064	ENSOMYG00000046064	protein_coding
gene:ENSOMYG00000014925	30	31686834..31725690	4.56598	1.53676	2.90142	3.9646e-05	0.000846868	1	ENSOMYG00000014925	ENSOMYG00000014925	protein_coding
spout1	5	complement(15771720..15775877)	17.7176	1.53587	2.89964	0.000135906	0.00222107	1	ENSOMYG00000003272	ENSOMYG00000003272	protein_coding
gene:ENSOMYG00000047384	27	25910173..25920358	4.41366	1.53582	2.89954	5.07232e-05	0.00102096	1	ENSOMYG00000047384	ENSOMYG00000047384	protein_coding
gene:ENSOMYG00000015704	10	30460930..30463576	17.1575	1.53568	2.89926	0.000286002	0.00398587	1	ENSOMYG00000015704	ENSOMYG00000015704	protein_coding
sft2d1_1	16	complement(7000611..7020770)	3.42554	1.53562	2.89913	0.00567025	0.0388003	1	ENSOMYG00000051704	ENSOMYG00000051704	protein_coding
hdac9b_2	3	2010224..2124908	50.52	1.53514	2.89817	0.000233009	0.00338056	1	ENSOMYG00000054264	ENSOMYG00000054264	protein_coding
abraxas1_2	12	complement(19086352..19092149)	7.98848	1.53497	2.89782	2.16552e-05	0.000516761	0.797668	ENSOMYG00000028158	ENSOMYG00000028158	protein_coding
gene:ENSOMYG00000061542	17	1325279..1364074	3.77993	1.53492	2.89772	0.000209289	0.00310906	1	ENSOMYG00000061542	ENSOMYG00000061542	protein_coding
STYXL2_2	18	complement(12912060..12921207)	165.354	1.53399	2.89586	0.0016645	0.0154115	1	ENSOMYG00000059890	ENSOMYG00000059890	protein_coding
gene:ENSOMYG00000017243	31	23069373..23141167	1.94782	1.53242	2.89271	0.000638498	0.00732804	1	ENSOMYG00000017243	ENSOMYG00000017243	protein_coding
gene:ENSOMYG00000031126	3	complement(60892971..60941610)	18.2323	1.53176	2.89139	0.000360563	0.00477413	1	ENSOMYG00000031126	ENSOMYG00000031126	protein_coding
mlx_1	12	complement(71188742..71194327)	29.9947	1.53152	2.89091	6.81871e-06	0.000204497	0.251167	ENSOMYG00000012302	ENSOMYG00000012302	protein_coding
FILIP1_1	4	complement(11908582..11936151)	20.8893	1.53149	2.89084	0.000350314	0.00467244	1	ENSOMYG00000018971	ENSOMYG00000018971	protein_coding
zftraf1_1	18	52641662..52644792	16.6741	1.53113	2.89012	2.2946e-05	0.000542498	0.845216	ENSOMYG00000041131	ENSOMYG00000041131	protein_coding
SLC35F5_1	3	complement(43021490..43043736)	2.18325	1.53077	2.88939	0.00134831	0.0130833	1	ENSOMYG00000016636	ENSOMYG00000016636	protein_coding
PPIP5K2	5	complement(9386547..9446589)	2.12765	1.53058	2.88902	7.32477e-05	0.00135836	1	ENSOMYG00000004223	ENSOMYG00000004223	protein_coding
gene:ENSOMYG00000009093	32	complement(31006695..31046514)	1.07166	1.53051	2.88887	0.00473599	0.0339397	1	ENSOMYG00000009093	ENSOMYG00000009093	protein_coding
snapin_2	32	complement(31324910..31334764)	14.6257	1.52995	2.88775	7.00225e-05	0.00130616	1	ENSOMYG00000009554	ENSOMYG00000009554	protein_coding
lipea	32	complement(40741806..40753974)	1.68236	1.52883	2.88551	0.000779997	0.00856415	1	ENSOMYG00000003639	ENSOMYG00000003639	protein_coding
gene:ENSOMYG00000052164	30	26257306..26280515	2.58389	1.52877	2.88539	0.000192956	0.00292619	1	ENSOMYG00000052164	ENSOMYG00000052164	protein_coding
TNS1_1	3	complement(76524058..76781179)	9.83958	1.52769	2.88323	0.000319115	0.00434276	1	ENSOMYG00000027724	ENSOMYG00000027724	protein_coding
rad51c_1	10	27366893..27396473	3.89956	1.52652	2.8809	0.00111186	0.0113196	1	ENSOMYG00000017453	ENSOMYG00000017453	protein_coding
med27_2	11	45686980..45786944	7.33133	1.52583	2.87952	0.000141146	0.00228037	1	ENSOMYG00000011108	ENSOMYG00000011108	protein_coding
gene:ENSOMYG00000033421	22	30435058..30478614	4.46258	1.52572	2.8793	0.000102934	0.00178218	1	ENSOMYG00000033421	ENSOMYG00000033421	protein_coding
vps4a_1	1	24796158..24806028	7.20492	1.52524	2.87834	0.000358396	0.00475038	1	ENSOMYG00000031745	ENSOMYG00000031745	protein_coding
mus81	9	7252850..7275159	4.02525	1.52465	2.87718	0.000241644	0.00347808	1	ENSOMYG00000017415	ENSOMYG00000017415	protein_coding
chmp6b_1	20	38076382..38080554	20.5454	1.52382	2.87552	1.2023e-05	0.000320556	0.442869	ENSOMYG00000044327	ENSOMYG00000044327	protein_coding
sp2_2	17	complement(28131010..28148480)	7.91857	1.5238	2.87548	1.9001e-05	0.000464748	0.699901	ENSOMYG00000017220	ENSOMYG00000017220	protein_coding
gene:ENSOMYG00000033607	6	12244502..12247295	5.36147	1.52373	2.87533	0.000144015	0.0023223	1	ENSOMYG00000033607	ENSOMYG00000033607	protein_coding
ppp1r1b_2	13	complement(36414833..36443153)	102.945	1.52344	2.87475	0.000569644	0.00673052	1	ENSOMYG00000054547	ENSOMYG00000054547	protein_coding
gene:ENSOMYG00000061957	12	100689365..100750667	4.37075	1.52251	2.87291	8.23399e-05	0.00148902	1	ENSOMYG00000061957	ENSOMYG00000061957	protein_coding
gene:ENSOMYG00000039078	18	5525938..5547613	1.43583	1.52191	2.87171	0.00179645	0.016307	1	ENSOMYG00000039078	ENSOMYG00000039078	protein_coding
gene:ENSOMYG00000013473	13	54598979..54612978	3.38505	1.52188	2.87165	6.07867e-05	0.00118149	1	ENSOMYG00000013473	ENSOMYG00000013473	protein_coding
gene:ENSOMYG00000042405	9	56673254..56707045	1.92345	1.52178	2.87145	0.00396754	0.029721	1	ENSOMYG00000042405	ENSOMYG00000042405	protein_coding
tpd52_2	32	complement(11761258..11811636)	4.10431	1.52112	2.87014	0.00139083	0.0134269	1	ENSOMYG00000058197	ENSOMYG00000058197	protein_coding
gene:ENSOMYG00000012514	17	complement(79316005..79320251)	12.225	1.52093	2.86977	0.00448366	0.0325715	1	ENSOMYG00000012514	ENSOMYG00000012514	protein_coding
gene:ENSOMYG00000038929	27	50465915..50476206	3.41007	1.52029	2.86849	0.00586406	0.0396997	1	ENSOMYG00000038929	ENSOMYG00000038929	protein_coding
usf1_2	27	14849594..14853475	22.7115	1.5201	2.8681	1.69782e-05	0.000426331	0.625393	ENSOMYG00000046441	ENSOMYG00000046441	protein_coding
sec20	12	complement(54285361..54291214)	17.2142	1.51966	2.86724	9.76725e-06	0.000272582	0.359777	ENSOMYG00000016108	ENSOMYG00000016108	protein_coding
glyr1_1	12	complement(98284218..98316810)	19.792	1.51895	2.86582	0.000117618	0.00198462	1	ENSOMYG00000052924	ENSOMYG00000052924	protein_coding
rcl1	5	46171394..46192317	56.2997	1.51873	2.8654	0.000214516	0.00316596	1	ENSOMYG00000030970	ENSOMYG00000030970	protein_coding
gene:ENSOMYG00000007632	3	complement(63529214..63531913)	10.7409	1.51831	2.86456	0.000713628	0.00799401	1	ENSOMYG00000007632	ENSOMYG00000007632	protein_coding
gene:ENSOMYG00000003859	14	4937422..4950868	7.8897	1.51823	2.86439	9.16975e-05	0.00163159	1	ENSOMYG00000003859	ENSOMYG00000003859	protein_coding
gene:ENSOMYG00000059563	13	6867607..6888054	1.07392	1.51766	2.86326	0.00462976	0.0333285	1	ENSOMYG00000059563	ENSOMYG00000059563	protein_coding
psma8	30	33661863..33664964	49.1551	1.51734	2.86263	0.000646024	0.0073862	1	ENSOMYG00000027172	ENSOMYG00000027172	protein_coding
NDUFS1	3	50595748..50601659	8.2168	1.51663	2.86123	1.54144e-05	0.000393267	0.567788	ENSOMYG00000031087	ENSOMYG00000031087	protein_coding
fem1c_1	6	complement(11464870..11468762)	54.4962	1.51523	2.85844	0.0003144	0.00428776	1	ENSOMYG00000029490	ENSOMYG00000029490	protein_coding
gene:ENSOMYG00000013984	7	20528654..20537666	3.92377	1.51501	2.858	6.98676e-05	0.00130423	1	ENSOMYG00000013984	ENSOMYG00000013984	protein_coding
gene:ENSOMYG00000077755	13	2524112..2698613	0.67712	1.51495	2.85789	0.00154716	0.0146011	1	ENSOMYG00000077755	ENSOMYG00000077755	protein_coding
CLINT1_1	10	10669921..10732762	2.36772	1.51473	2.85746	7.37746e-05	0.00136614	1	ENSOMYG00000069962	ENSOMYG00000069962	protein_coding
gene:ENSOMYG00000007339	17	complement(94365241..94383271)	22.724	1.5137	2.85541	0.000204116	0.00304821	1	ENSOMYG00000007339	ENSOMYG00000007339	protein_coding
gene:ENSOMYG00000001608	7	24310827..24347738	1.6295	1.51368	2.85538	0.00204773	0.0180682	1	ENSOMYG00000001608	ENSOMYG00000001608	protein_coding
fam135a_1	1	complement(85248734..85295630)	3.34937	1.51364	2.8553	2.71772e-05	0.000624537	1	ENSOMYG00000051623	ENSOMYG00000051623	protein_coding
gene:ENSOMYG00000001919	6	complement(6798594..6842369)	2.41412	1.5136	2.85521	4.92054e-05	0.000998301	1	ENSOMYG00000001919	ENSOMYG00000001919	protein_coding
gene:ENSOMYG00000038475	23	complement(12094875..12097828)	9.39216	1.51229	2.85262	8.38267e-05	0.00151161	1	ENSOMYG00000038475	ENSOMYG00000038475	protein_coding
aox6	7	23271562..23289488	15.175	1.51211	2.85227	0.000227223	0.00331728	1	ENSOMYG00000043426	ENSOMYG00000043426	protein_coding
TMEM87A	25	complement(44432164..44454801)	8.9111	1.51152	2.85111	6.91091e-05	0.00129831	1	ENSOMYG00000037418	ENSOMYG00000037418	protein_coding
mknk2b_2	30	20227003..20240539	14.5369	1.51095	2.84997	9.19721e-05	0.00163533	1	ENSOMYG00000015307	ENSOMYG00000015307	protein_coding
gene:ENSOMYG00000017600	10	60826103..60911504	33.6949	1.50999	2.84808	0.00107627	0.0110723	1	ENSOMYG00000017600	ENSOMYG00000017600	protein_coding
gene:ENSOMYG00000020330	15	complement(27796273..27804802)	6.94682	1.50862	2.84538	0.000149387	0.00238178	1	ENSOMYG00000020330	ENSOMYG00000020330	protein_coding
gene:ENSOMYG00000004445	2	27331891..27377806	1.07977	1.5081	2.84436	0.00632824	0.0419936	1	ENSOMYG00000004445	ENSOMYG00000004445	protein_coding
mfsd11_1	12	79354433..79359186	2.14239	1.50705	2.84228	0.00176221	0.0160477	1	ENSOMYG00000003387	ENSOMYG00000003387	protein_coding
EEF2K	23	complement(46649726..46672893)	4.0895	1.50653	2.84127	0.000337468	0.00454155	1	ENSOMYG00000044604	ENSOMYG00000044604	protein_coding
gene:ENSOMYG00000001282	7	49130129..49135732	17.1046	1.50631	2.84082	0.000147229	0.0023577	1	ENSOMYG00000001282	ENSOMYG00000001282	protein_coding
dedd_2	16	complement(52869729..52872901)	5.21912	1.50531	2.83885	0.000241559	0.00347808	1	ENSOMYG00000011301	ENSOMYG00000011301	protein_coding
gene:ENSOMYG00000020320	18	complement(25409273..25427146)	24.0065	1.5047	2.83767	0.000494552	0.00602213	1	ENSOMYG00000020320	ENSOMYG00000020320	protein_coding
gene:ENSOMYG00000011671	19	42578240..42588894	12.9001	1.50446	2.83718	7.10973e-05	0.00132524	1	ENSOMYG00000011671	ENSOMYG00000011671	protein_coding
mlycd_2	2	67524566..67536559	15.9036	1.50344	2.83518	4.7934e-05	0.000981627	1	ENSOMYG00000016528	ENSOMYG00000016528	protein_coding
exosc1_2	17	complement(13862164..13869353)	5.43781	1.50103	2.83045	0.000193493	0.00292735	1	ENSOMYG00000075326	ENSOMYG00000075326	protein_coding
gene:ENSOMYG00000011753	20	complement(39665324..39668068)	11.0534	1.50041	2.82923	0.000155389	0.00244985	1	ENSOMYG00000011753	ENSOMYG00000011753	protein_coding
gnsb	5	complement(16692799..16711526)	12.5838	1.49898	2.82644	5.5961e-05	0.00110285	1	ENSOMYG00000025611	ENSOMYG00000025611	protein_coding
tyms	15	complement(28616467..28620189)	28.6329	1.49862	2.82573	0.00201301	0.0178341	1	ENSOMYG00000018372	ENSOMYG00000018372	protein_coding
NDE1_1	13	14362700..14367892	2.2129	1.49842	2.82533	0.00759895	0.0478448	1	ENSOMYG00000005056	ENSOMYG00000005056	protein_coding
gene:ENSOMYG00000002359	5	99062101..99126382	16.7596	1.49831	2.82513	0.00131102	0.0127946	1	ENSOMYG00000002359	ENSOMYG00000002359	protein_coding
rasgrp3_1	1	69942538..69954385	1.68124	1.49741	2.82335	0.00189095	0.0169295	1	ENSOMYG00000013539	ENSOMYG00000013539	protein_coding
atp6v1e1a	2	85831287..85836115	20.4647	1.4966	2.82178	2.05366e-05	0.00049377	0.756464	ENSOMYG00000020375	ENSOMYG00000020375	protein_coding
gene:ENSOMYG00000005343	7	complement(88778163..88779687)	11.8416	1.49635	2.82128	0.000397224	0.00515966	1	ENSOMYG00000005343	ENSOMYG00000005343	protein_coding
gene:ENSOMYG00000018336	8	77863977..77883662	10.4026	1.49518	2.81899	2.84213e-05	0.000649026	1	ENSOMYG00000018336	ENSOMYG00000018336	protein_coding
calcoco1a_1	9	64850680..64869103	14.5014	1.49465	2.81795	9.55108e-05	0.0016886	1	ENSOMYG00000010039	ENSOMYG00000010039	protein_coding
gene:ENSOMYG00000009516	2	94639157..94664982	2.67002	1.49437	2.8174	5.13141e-05	0.00102929	1	ENSOMYG00000009516	ENSOMYG00000009516	protein_coding
fbxl2_2	32	complement(10323489..10352508)	1.19007	1.49436	2.81739	0.00159941	0.0149776	1	ENSOMYG00000052860	ENSOMYG00000052860	protein_coding
gene:ENSOMYG00000043642	24	complement(13708462..13718397)	28.4778	1.49302	2.81477	0.000151498	0.00240489	1	ENSOMYG00000043642	ENSOMYG00000043642	protein_coding
gene:ENSOMYG00000016394	5	62468258..62473479	6.42477	1.49289	2.81452	0.000332874	0.00448684	1	ENSOMYG00000016394	ENSOMYG00000016394	protein_coding
SIX1_1	19	40559525..40561293	151.902	1.49187	2.81254	0.000408078	0.005261	1	ENSOMYG00000033510	ENSOMYG00000033510	protein_coding
gene:ENSOMYG00000033798	16	complement(73782986..73822727)	10.7542	1.49136	2.81154	6.03546e-05	0.00117488	1	ENSOMYG00000033798	ENSOMYG00000033798	protein_coding
gene:ENSOMYG00000059212	17	complement(4994869..5004608)	4.38521	1.49104	2.81091	0.000522015	0.00628412	1	ENSOMYG00000059212	ENSOMYG00000059212	protein_coding
TRIP10_1	17	48918..119155	1.82968	1.49069	2.81023	0.0018971	0.0169726	1	ENSOMYG00000057041	ENSOMYG00000057041	protein_coding
ACVR1B_1	9	complement(65804123..65827590)	4.43165	1.49027	2.80941	0.000419931	0.00535805	1	ENSOMYG00000014378	ENSOMYG00000014378	protein_coding
gene:ENSOMYG00000003662	8	complement(51796884..51805068)	38.0661	1.48966	2.80822	0.000415822	0.00533115	1	ENSOMYG00000003662	ENSOMYG00000003662	protein_coding
gene:ENSOMYG00000043532	6	complement(43940501..43955916)	64.5255	1.4886	2.80617	0.00055119	0.00655506	1	ENSOMYG00000043532	ENSOMYG00000043532	protein_coding
tbc1d5_1	18	complement(57940214..57966043)	7.09983	1.48801	2.80503	8.66118e-05	0.00155413	1	ENSOMYG00000013579	ENSOMYG00000013579	protein_coding
COPS2_1	6	80093476..80106063	24.7715	1.48718	2.80341	0.000313811	0.0042852	1	ENSOMYG00000076780	ENSOMYG00000076780	protein_coding
CCDC93_2	22	28027977..28036629	13.3417	1.48662	2.80232	3.26635e-05	0.000723827	1	ENSOMYG00000027858	ENSOMYG00000027858	protein_coding
tecpr2_1	19	complement(33976912..34005832)	6.69626	1.48625	2.8016	4.70954e-05	0.000968614	1	ENSOMYG00000038473	ENSOMYG00000038473	protein_coding
srek1ip1	5	42258021..42265737	8.36357	1.48557	2.80028	0.000102443	0.00177723	1	ENSOMYG00000020161	ENSOMYG00000020161	protein_coding
tbc1d32	4	16668747..16710804	1.08194	1.48543	2.8	0.00132777	0.0129087	1	ENSOMYG00000000692	ENSOMYG00000000692	protein_coding
firrm	5	94146621..94165491	3.94689	1.48488	2.79895	4.55985e-05	0.000943925	1	ENSOMYG00000014441	ENSOMYG00000014441	protein_coding
tbl1xr1a_1	5	complement(70839071..70843887)	5.21914	1.48453	2.79827	6.85612e-05	0.0012912	1	ENSOMYG00000024336	ENSOMYG00000024336	protein_coding
GPR155_2	7	complement(1223424..1247298)	1.11787	1.48448	2.79817	0.00634096	0.0420342	1	ENSOMYG00000073699	ENSOMYG00000073699	protein_coding
msrb3_1	15	complement(74167765..74212838)	56.4207	1.48383	2.7969	0.00132071	0.0128595	1	ENSOMYG00000031693	ENSOMYG00000031693	protein_coding
gene:ENSOMYG00000018083	2	50183089..50198423	26.9898	1.48309	2.79546	6.95759e-05	0.00130179	1	ENSOMYG00000018083	ENSOMYG00000018083	protein_coding
gene:ENSOMYG00000062433	13	13394795..13396093	8.43127	1.48207	2.7935	0.00145402	0.0139286	1	ENSOMYG00000062433	ENSOMYG00000062433	protein_coding
scamp3_2	32	39266194..39276929	8.49441	1.48167	2.79271	5.63788e-05	0.00111022	1	ENSOMYG00000069466	ENSOMYG00000069466	protein_coding
GABRR1	25	8200838..8214937	1.30596	1.48155	2.79249	0.00689724	0.0447478	1	ENSOMYG00000022291	ENSOMYG00000022291	protein_coding
dohh_1	5	complement(66666987..66675677)	21.2387	1.48114	2.79169	0.000400164	0.00518259	1	ENSOMYG00000012518	ENSOMYG00000012518	protein_coding
gene:ENSOMYG00000026773	2	complement(100864015..100889704)	2.16469	1.48088	2.79118	0.000385227	0.00503266	1	ENSOMYG00000026773	ENSOMYG00000026773	protein_coding
pik3ip1_2	11	59840631..59846556	17.5693	1.48072	2.79087	0.00121275	0.0121189	1	ENSOMYG00000027329	ENSOMYG00000027329	protein_coding
gene:ENSOMYG00000020390	8	complement(36677734..36681433)	6.79604	1.48018	2.78983	0.000248235	0.00354889	1	ENSOMYG00000020390	ENSOMYG00000020390	protein_coding
gene:ENSOMYG00000020360	16	complement(24280502..24351178)	0.751796	1.47994	2.78936	0.00321338	0.0253939	1	ENSOMYG00000020360	ENSOMYG00000020360	protein_coding
gene:ENSOMYG00000005527	8	complement(43600049..43601708)	28.9119	1.47963	2.78878	0.0005401	0.00645029	1	ENSOMYG00000005527	ENSOMYG00000005527	protein_coding
atraid_1	4	complement(42365743..42369772)	7.06368	1.47945	2.78843	0.000702737	0.00788936	1	ENSOMYG00000030789	ENSOMYG00000030789	protein_coding
slc48a1b	7	complement(76070425..76085879)	3.98678	1.47914	2.78782	0.00139868	0.0134847	1	ENSOMYG00000056595	ENSOMYG00000056595	protein_coding
gene:ENSOMYG00000060047	13	complement(9035508..9040694)	2.11609	1.47904	2.78762	0.000521898	0.00628412	1	ENSOMYG00000060047	ENSOMYG00000060047	protein_coding
snx18a_1	6	3826910..3866587	10.4617	1.47825	2.78611	5.02943e-05	0.00101475	1	ENSOMYG00000031951	ENSOMYG00000031951	protein_coding
gps1_2	13	70088648..70117478	4.72192	1.47775	2.78514	7.13132e-05	0.00132732	1	ENSOMYG00000062042	ENSOMYG00000062042	protein_coding
gene:ENSOMYG00000019826	31	14257137..14287774	7.42058	1.47765	2.78494	0.000288642	0.00401826	1	ENSOMYG00000019826	ENSOMYG00000019826	protein_coding
gene:ENSOMYG00000014896	4	complement(21312155..21313189)	14.0194	1.47672	2.78315	0.00021632	0.00318563	1	ENSOMYG00000014896	ENSOMYG00000014896	protein_coding
gene:ENSOMYG00000069616	25	23312914..23315432	2.7942	1.47413	2.77816	0.00134605	0.0130664	1	ENSOMYG00000069616	ENSOMYG00000069616	protein_coding
gene:ENSOMYG00000072159	17	14145435..14150395	2.04766	1.47385	2.77762	0.00757937	0.0477496	1	ENSOMYG00000072159	ENSOMYG00000072159	protein_coding
psmd11b_1	16	complement(18082669..18089348)	47.7117	1.47379	2.77751	0.00447314	0.0325508	1	ENSOMYG00000042895	ENSOMYG00000042895	protein_coding
dnajc12	1	complement(61544685..61548656)	6.90423	1.47324	2.77645	0.000214612	0.00316596	1	ENSOMYG00000022814	ENSOMYG00000022814	protein_coding
PSMB1	20	26970219..26972486	105.447	1.47322	2.7764	0.00115251	0.0116542	1	ENSOMYG00000041069	ENSOMYG00000041069	protein_coding
gene:ENSOMYG00000044648	1	52708431..52720446	10.2521	1.47268	2.77537	0.000273033	0.00383662	1	ENSOMYG00000044648	ENSOMYG00000044648	protein_coding
crot_1	2	15385897..15399572	7.75486	1.47266	2.77534	0.000225347	0.0032938	1	ENSOMYG00000000485	ENSOMYG00000000485	protein_coding
gene:ENSOMYG00000015770	25	complement(28067604..28094127)	4.66575	1.47179	2.77365	0.000148292	0.00236877	1	ENSOMYG00000015770	ENSOMYG00000015770	protein_coding
ppp1r3cb_1	16	complement(13932009..13936476)	15.7611	1.47174	2.77355	0.000688573	0.00777836	1	ENSOMYG00000065271	ENSOMYG00000065271	protein_coding
ppp1r15b_2	30	complement(10057075..10063208)	29.7065	1.47153	2.77316	0.0008681	0.00935007	1	ENSOMYG00000033838	ENSOMYG00000033838	protein_coding
gene:ENSOMYG00000017579	22	42615541..42680665	2.57287	1.47152	2.77313	0.00044579	0.005597	1	ENSOMYG00000017579	ENSOMYG00000017579	protein_coding
gene:ENSOMYG00000015713	6	complement(71269395..71309525)	15.8894	1.47106	2.77226	0.00108507	0.0111292	1	ENSOMYG00000015713	ENSOMYG00000015713	protein_coding
gene:ENSOMYG00000044172	8	complement(18949132..19007437)	3.03771	1.47003	2.77028	7.42912e-05	0.00137172	1	ENSOMYG00000044172	ENSOMYG00000044172	protein_coding
gene:ENSOMYG00000037018	15	complement(57720107..57737015)	5.47537	1.4685	2.76733	0.000157789	0.00248001	1	ENSOMYG00000037018	ENSOMYG00000037018	protein_coding
gene:ENSOMYG00000041822	12	complement(37901259..37923324)	5.73112	1.46816	2.76669	0.00662242	0.0433486	1	ENSOMYG00000041822	ENSOMYG00000041822	protein_coding
atraid_2	8	3968916..3974945	33.2961	1.46789	2.76617	0.0004391	0.00552662	1	ENSOMYG00000001771	ENSOMYG00000001771	protein_coding
gene:ENSOMYG00000005131	7	88239731..88240825	21.4027	1.46751	2.76545	0.000112976	0.00192287	1	ENSOMYG00000005131	ENSOMYG00000005131	protein_coding
FBXO4	6	complement(41562356..41565829)	2.32286	1.46582	2.7622	0.00405736	0.0302691	1	ENSOMYG00000031310	ENSOMYG00000031310	protein_coding
gene:ENSOMYG00000018785	8	complement(73862560..73867498)	6.62498	1.46506	2.76074	6.94312e-05	0.00130179	1	ENSOMYG00000018785	ENSOMYG00000018785	protein_coding
gene:ENSOMYG00000019523	16	43997896..44002554	6.54576	1.4644	2.75948	0.000216544	0.00318707	1	ENSOMYG00000019523	ENSOMYG00000019523	protein_coding
gene:ENSOMYG00000021645	5	complement(55182573..55221838)	15.3171	1.4641	2.75891	0.00021671	0.00318768	1	ENSOMYG00000021645	ENSOMYG00000021645	protein_coding
ap5b1	17	64194997..64198485	1.03183	1.46394	2.75861	0.00291425	0.0236164	1	ENSOMYG00000009262	ENSOMYG00000009262	protein_coding
gdap2_1	3	65777005..65813291	2.10845	1.46318	2.75716	0.000245992	0.00352923	1	ENSOMYG00000012081	ENSOMYG00000012081	protein_coding
LRTM2_2	21	670070..708489	5.30224	1.46289	2.7566	0.000429269	0.00542973	1	ENSOMYG00000062405	ENSOMYG00000062405	protein_coding
optn_1	15	complement(55236640..55247020)	29.4653	1.46245	2.75577	0.000584843	0.00685917	1	ENSOMYG00000044838	ENSOMYG00000044838	protein_coding
gene:ENSOMYG00000003150	9	68891912..68895475	4.82753	1.46239	2.75565	0.000610299	0.00707947	1	ENSOMYG00000003150	ENSOMYG00000003150	protein_coding
rbm18_1	5	44998118..45017193	5.11078	1.46024	2.75155	0.000163311	0.0025471	1	ENSOMYG00000025520	ENSOMYG00000025520	protein_coding
gene:ENSOMYG00000015297	19	52003603..52036088	3.97622	1.45913	2.74943	4.79728e-05	0.000981627	1	ENSOMYG00000015297	ENSOMYG00000015297	protein_coding
gene:ENSOMYG00000013160	13	36042581..36047073	0.679291	1.45725	2.74585	0.00717472	0.0460042	1	ENSOMYG00000013160	ENSOMYG00000013160	protein_coding
gene:ENSOMYG00000035921	22	complement(5743626..5788366)	24.8862	1.45715	2.74566	0.000296216	0.00410352	1	ENSOMYG00000035921	ENSOMYG00000035921	protein_coding
SMAD1_1	10	complement(68105935..68127857)	27.9994	1.45678	2.74494	0.000256041	0.00364615	1	ENSOMYG00000003384	ENSOMYG00000003384	protein_coding
znf740b_1	9	64445184..64451263	2.58045	1.45641	2.74425	0.00252691	0.0211855	1	ENSOMYG00000063586	ENSOMYG00000063586	protein_coding
mcrip1_1	12	79051646..79052975	5.58397	1.45619	2.74383	0.000608857	0.00706918	1	ENSOMYG00000032828	ENSOMYG00000032828	protein_coding
n4bp1_2	2	68883902..68907631	1.78549	1.45614	2.74373	0.0030018	0.024111	1	ENSOMYG00000017321	ENSOMYG00000017321	protein_coding
gene:ENSOMYG00000043118	26	14499863..14518554	3.41176	1.45542	2.74236	0.00564692	0.0386614	1	ENSOMYG00000043118	ENSOMYG00000043118	protein_coding
csrp1	17	complement(82449733..82455853)	6.96418	1.454	2.73966	0.000101514	0.00176554	1	ENSOMYG00000027036	ENSOMYG00000027036	protein_coding
med8_2	30	complement(32488249..32490941)	14.4759	1.45372	2.73914	0.000127507	0.0021178	1	ENSOMYG00000017683	ENSOMYG00000017683	protein_coding
gene:ENSOMYG00000017118	12	complement(11621412..11665778)	5.06222	1.45364	2.73898	0.000604832	0.00703691	1	ENSOMYG00000017118	ENSOMYG00000017118	protein_coding
gene:ENSOMYG00000007077	5	41524212..41550830	10.3483	1.45205	2.73596	0.000861282	0.00930024	1	ENSOMYG00000007077	ENSOMYG00000007077	protein_coding
kiz	25	complement(15693718..15732426)	2.39259	1.45204	2.73595	0.00122926	0.0122235	1	ENSOMYG00000038967	ENSOMYG00000038967	protein_coding
AFF3	22	7911962..7955730	1.7072	1.4517	2.73531	0.00300367	0.0241184	1	ENSOMYG00000044214	ENSOMYG00000044214	protein_coding
gene:ENSOMYG00000015312	8	complement(34545348..34547570)	2.92505	1.45147	2.73487	0.00496024	0.0351706	1	ENSOMYG00000015312	ENSOMYG00000015312	protein_coding
gene:ENSOMYG00000032562	6	complement(4601406..4616908)	7.99739	1.45074	2.73349	0.000136744	0.0022262	1	ENSOMYG00000032562	ENSOMYG00000032562	protein_coding
ift88	3	65363128..65387641	1.47782	1.45027	2.73259	0.000411221	0.00528814	1	ENSOMYG00000012425	ENSOMYG00000012425	protein_coding
dgat1b_1	2	9701806..9742447	1.55283	1.44994	2.73197	0.00211677	0.0185278	1	ENSOMYG00000064075	ENSOMYG00000064075	protein_coding
map2k4b_2	20	7678000..7693697	10.7845	1.44961	2.73134	0.00026343	0.00372223	1	ENSOMYG00000007056	ENSOMYG00000007056	protein_coding
usp20_1	5	15817529..15837513	3.08605	1.4495	2.73113	0.000180666	0.00277116	1	ENSOMYG00000004678	ENSOMYG00000004678	protein_coding
gene:ENSOMYG00000069009	9	complement(3110319..3175880)	9.69147	1.44872	2.72966	0.000323245	0.00439192	1	ENSOMYG00000069009	ENSOMYG00000069009	protein_coding
COPS2_2	26	40433981..40447571	22.7753	1.44846	2.72916	0.000288857	0.00401905	1	ENSOMYG00000031735	ENSOMYG00000031735	protein_coding
gene:ENSOMYG00000015422	18	complement(58641030..58661356)	6.2858	1.44774	2.7278	5.65994e-05	0.0011137	1	ENSOMYG00000015422	ENSOMYG00000015422	protein_coding
gene:ENSOMYG00000048693	21	complement(61151555..61178535)	5.70505	1.44723	2.72684	0.000514994	0.00622048	1	ENSOMYG00000048693	ENSOMYG00000048693	protein_coding
gene:ENSOMYG00000059317	25	42226524..42234212	3.03425	1.44519	2.72298	9.48562e-05	0.00167841	1	ENSOMYG00000059317	ENSOMYG00000059317	protein_coding
CREB3L4_1	2	30079630..30082507	6.1825	1.44504	2.72271	0.000104824	0.0018034	1	ENSOMYG00000001006	ENSOMYG00000001006	protein_coding
gene:ENSOMYG00000006420	3	complement(62548351..62595153)	6.3117	1.44421	2.72113	6.12476e-05	0.00118773	1	ENSOMYG00000006420	ENSOMYG00000006420	protein_coding
gene:ENSOMYG00000039188	32	34283202..34286016	2.57598	1.44393	2.72061	0.000934762	0.0099336	1	ENSOMYG00000039188	ENSOMYG00000039188	protein_coding
gene:ENSOMYG00000056741	17	12331675..12338642	7.86885	1.44358	2.71995	0.00019748	0.00297001	1	ENSOMYG00000056741	ENSOMYG00000056741	protein_coding
gene:ENSOMYG00000041655	1	89007576..89020949	3.01282	1.44324	2.71931	0.000173359	0.00267617	1	ENSOMYG00000041655	ENSOMYG00000041655	protein_coding
gene:ENSOMYG00000016019	17	complement(28096311..28119278)	5.40887	1.44166	2.71632	0.00041085	0.00528603	1	ENSOMYG00000016019	ENSOMYG00000016019	protein_coding
gene:ENSOMYG00000048969	11	complement(38171021..38198751)	1.73011	1.44155	2.71613	0.00130307	0.0127366	1	ENSOMYG00000048969	ENSOMYG00000048969	protein_coding
rnf24_2	19	complement(20208593..20232465)	5.8225	1.44096	2.71501	0.00598739	0.040267	1	ENSOMYG00000015737	ENSOMYG00000015737	protein_coding
gene:ENSOMYG00000035652	19	48590067..48678182	3.11003	1.44077	2.71466	0.000246793	0.00353629	1	ENSOMYG00000035652	ENSOMYG00000035652	protein_coding
cry1b_1	1	complement(41445762..41458851)	3.11054	1.43983	2.7129	0.00158269	0.0148648	1	ENSOMYG00000000195	ENSOMYG00000000195	protein_coding
cab39l1	31	complement(17722488..17734634)	4.886	1.43958	2.71242	0.00023354	0.00338633	1	ENSOMYG00000040284	ENSOMYG00000040284	protein_coding
wrap73	9	43744313..43764856	6.59181	1.43849	2.71037	0.000317228	0.0043217	1	ENSOMYG00000022404	ENSOMYG00000022404	protein_coding
gene:ENSOMYG00000048739	15	9810670..9843765	2.20616	1.43621	2.7061	0.00165357	0.0153401	1	ENSOMYG00000048739	ENSOMYG00000048739	protein_coding
gene:ENSOMYG00000040363	12	complement(74567490..74576957)	2.0277	1.43514	2.70408	0.00169442	0.0156047	1	ENSOMYG00000040363	ENSOMYG00000040363	protein_coding
gene:ENSOMYG00000037796	12	31905627..31914328	13.9006	1.43479	2.70342	6.70325e-05	0.00127277	1	ENSOMYG00000037796	ENSOMYG00000037796	protein_coding
mmadhca_1	7	7624540..7632278	81.9296	1.43461	2.7031	0.000827757	0.00901469	1	ENSOMYG00000058850	ENSOMYG00000058850	protein_coding
eif4ba	16	complement(37868678..37881885)	28.5161	1.43319	2.70044	0.0010389	0.0107959	1	ENSOMYG00000018436	ENSOMYG00000018436	protein_coding
glyr1_2	13	69774470..69800351	16.0944	1.43311	2.70029	0.000348946	0.00465908	1	ENSOMYG00000055480	ENSOMYG00000055480	protein_coding
st3gal4_2	27	complement(25858066..25877184)	4.92428	1.43271	2.69953	0.00012221	0.00204583	1	ENSOMYG00000047344	ENSOMYG00000047344	protein_coding
gene:ENSOMYG00000015394	11	complement(61605898..61635433)	3.66793	1.43247	2.69908	0.000239352	0.00345291	1	ENSOMYG00000015394	ENSOMYG00000015394	protein_coding
gene:ENSOMYG00000007832	16	46266938..46278917	15.5068	1.43205	2.6983	0.000254079	0.00362024	1	ENSOMYG00000007832	ENSOMYG00000007832	protein_coding
gene:ENSOMYG00000028095	24	16801249..16832383	3.67972	1.43205	2.69829	0.000127328	0.0021162	1	ENSOMYG00000028095	ENSOMYG00000028095	protein_coding
gene:ENSOMYG00000030877	3	complement(44964393..44984178)	11.9141	1.43194	2.6981	0.000290451	0.00403393	1	ENSOMYG00000030877	ENSOMYG00000030877	protein_coding
mad2l2	16	complement(51022009..51031680)	6.69668	1.43007	2.69459	0.000455334	0.00568598	1	ENSOMYG00000040681	ENSOMYG00000040681	protein_coding
asah1b_1	10	complement(59697139..59703035)	24.0737	1.42964	2.6938	0.00162835	0.0151872	1	ENSOMYG00000016053	ENSOMYG00000016053	protein_coding
gene:ENSOMYG00000014254	9	complement(15288201..15312481)	9.45476	1.42948	2.6935	0.000168643	0.00261509	1	ENSOMYG00000014254	ENSOMYG00000014254	protein_coding
gene:ENSOMYG00000022804	6	complement(51021086..51023921)	54.322	1.42922	2.69302	0.000637815	0.00732804	1	ENSOMYG00000022804	ENSOMYG00000022804	protein_coding
gene:ENSOMYG00000011515	3	23681514..23695601	1.98633	1.4292	2.69297	0.00156658	0.0147384	1	ENSOMYG00000011515	ENSOMYG00000011515	protein_coding
gene:ENSOMYG00000063395	10	78446099..78483224	1.62666	1.42906	2.69271	0.000480649	0.00590651	1	ENSOMYG00000063395	ENSOMYG00000063395	protein_coding
gene:ENSOMYG00000042894	11	51851608..51871207	4.03871	1.42766	2.6901	0.000378745	0.00496432	1	ENSOMYG00000042894	ENSOMYG00000042894	protein_coding
gene:ENSOMYG00000017154	19	complement(58599186..58606480)	4.39577	1.42691	2.68871	0.000829063	0.00902119	1	ENSOMYG00000017154	ENSOMYG00000017154	protein_coding
gene:ENSOMYG00000038335	10	complement(41258379..41440834)	1.57581	1.42669	2.68828	0.00690315	0.0447533	1	ENSOMYG00000038335	ENSOMYG00000038335	protein_coding
ppm1la	28	29143475..29170159	30.0986	1.42656	2.68805	0.000457328	0.00570529	1	ENSOMYG00000004863	ENSOMYG00000004863	protein_coding
gene:ENSOMYG00000021069	12	complement(66994989..67001046)	559.961	1.42571	2.68647	0.00105028	0.0108928	1	ENSOMYG00000021069	ENSOMYG00000021069	protein_coding
ddit3_1	7	36909226..36913017	36.5211	1.42554	2.68615	0.00127819	0.0125706	1	ENSOMYG00000066053	ENSOMYG00000066053	protein_coding
ppdpfa_1	9	59025235..59028151	155.332	1.4252	2.68551	0.00172627	0.0157938	1	ENSOMYG00000013943	ENSOMYG00000013943	protein_coding
gene:ENSOMYG00000035596	9	78446869..78488880	14.42	1.42465	2.68449	0.000390588	0.00508193	1	ENSOMYG00000035596	ENSOMYG00000035596	protein_coding
rab40b_2	23	complement(40477131..40529717)	5.55872	1.42449	2.68419	0.000374536	0.00492584	1	ENSOMYG00000046558	ENSOMYG00000046558	protein_coding
lmbr1_2	15	complement(30729664..30784258)	7.02777	1.42421	2.68368	5.02949e-05	0.00101475	1	ENSOMYG00000023237	ENSOMYG00000023237	protein_coding
cnot10_2	3	4514554..4530808	4.9711	1.42418	2.68362	0.000736713	0.00821964	1	ENSOMYG00000018604	ENSOMYG00000018604	protein_coding
gene:ENSOMYG00000013753	6	23205788..23222091	9.07602	1.42375	2.68282	0.000229069	0.00334052	1	ENSOMYG00000013753	ENSOMYG00000013753	protein_coding
wbp1lb_1	13	complement(15646371..15664199)	5.80933	1.42373	2.68278	0.000185562	0.0028343	1	ENSOMYG00000030780	ENSOMYG00000030780	protein_coding
tbc1d5_2	32	complement(15189420..15215970)	8.65108	1.42307	2.68156	0.000128652	0.00213117	1	ENSOMYG00000009058	ENSOMYG00000009058	protein_coding
TUBB3_1	6	69598629..69604343	8.0554	1.4229	2.68124	0.000159743	0.00250301	1	ENSOMYG00000026304	ENSOMYG00000026304	protein_coding
leng1_1	2	complement(18587029..18590683)	4.78167	1.42185	2.67929	0.000419086	0.00535412	1	ENSOMYG00000002180	ENSOMYG00000002180	protein_coding
eef2kmt_2	13	71652540..71657387	3.8927	1.42167	2.67895	0.000338062	0.00454714	1	ENSOMYG00000011883	ENSOMYG00000011883	protein_coding
pcyt2_2	17	complement(14233489..14247992)	43.4557	1.42134	2.67835	0.000789851	0.00864997	1	ENSOMYG00000032532	ENSOMYG00000032532	protein_coding
eci1	12	complement(100530249..100543867)	47.0497	1.41998	2.67582	0.00366881	0.0280527	1	ENSOMYG00000069243	ENSOMYG00000069243	protein_coding
xab2	12	complement(63415070..63431032)	12.9834	1.41814	2.67241	0.00281781	0.023018	1	ENSOMYG00000030311	ENSOMYG00000030311	protein_coding
gene:ENSOMYG00000046655	Y	30653203..30674008	5.07221	1.41807	2.67228	0.000116943	0.00197585	1	ENSOMYG00000046655	ENSOMYG00000046655	protein_coding
MLXIP_2	11	58430514..58465072	6.46173	1.41765	2.6715	0.00030935	0.00424781	1	ENSOMYG00000012383	ENSOMYG00000012383	protein_coding
gene:ENSOMYG00000002030	7	30509439..30534871	23.7212	1.41753	2.67128	5.45394e-05	0.00107901	1	ENSOMYG00000002030	ENSOMYG00000002030	protein_coding
gene:ENSOMYG00000031707	5	complement(37577177..37585539)	1.17404	1.41744	2.67112	0.00299358	0.0240753	1	ENSOMYG00000031707	ENSOMYG00000031707	protein_coding
TCAIM_2	3	complement(4556492..4563318)	6.10522	1.41704	2.67036	0.000127249	0.0021162	1	ENSOMYG00000018691	ENSOMYG00000018691	protein_coding
gene:ENSOMYG00000010727	8	complement(26591715..26596739)	17.7914	1.41634	2.66908	0.000269058	0.00379122	1	ENSOMYG00000010727	ENSOMYG00000010727	protein_coding
gene:ENSOMYG00000006889	10	20873287..20877180	11.4698	1.41611	2.66864	0.000139024	0.00225898	1	ENSOMYG00000006889	ENSOMYG00000006889	protein_coding
NTPCR	16	complement(427669..442316)	17.5107	1.41562	2.66774	0.000146439	0.002348	1	ENSOMYG00000006273	ENSOMYG00000006273	protein_coding
atg101_1	10	32485777..32487182	13.3053	1.41498	2.66656	0.000103751	0.0017922	1	ENSOMYG00000022187	ENSOMYG00000022187	protein_coding
cerk	15	47412735..47443190	1.25122	1.41316	2.6632	0.0040716	0.0303575	1	ENSOMYG00000028390	ENSOMYG00000028390	protein_coding
MARCHF7_2	18	23772846..23778944	63.4709	1.41305	2.663	0.00105759	0.0109465	1	ENSOMYG00000012255	ENSOMYG00000012255	protein_coding
B2m_1	15	74347768..74415382	6.90927	1.41288	2.66267	9.23813e-05	0.00164032	1	ENSOMYG00000064973	ENSOMYG00000064973	protein_coding
gene:ENSOMYG00000049030	13	62963481..62980399	138.99	1.41276	2.66246	0.00102137	0.0106713	1	ENSOMYG00000049030	ENSOMYG00000049030	protein_coding
XIRP2	22	complement(15838566..15850585)	138.985	1.41205	2.66116	0.000449153	0.00562742	1	ENSOMYG00000030242	ENSOMYG00000030242	protein_coding
scamp3_1	18	complement(31780089..31784000)	6.35811	1.41084	2.65892	0.000517102	0.00623523	1	ENSOMYG00000042820	ENSOMYG00000042820	protein_coding
rflna_2	11	52935442..52945455	9.20652	1.4108	2.65885	0.004971	0.0352273	1	ENSOMYG00000006455	ENSOMYG00000006455	protein_coding
gene:ENSOMYG00000006593	16	complement(18880389..18887231)	2.74133	1.40934	2.65615	0.00440428	0.0321876	1	ENSOMYG00000006593	ENSOMYG00000006593	protein_coding
oaz2a	2	complement(53470577..53481546)	78.3426	1.4093	2.65608	0.000150099	0.00238864	1	ENSOMYG00000024192	ENSOMYG00000024192	protein_coding
gene:ENSOMYG00000032325	25	19107132..19128579	3.3915	1.40872	2.65501	0.00423362	0.0311371	1	ENSOMYG00000032325	ENSOMYG00000032325	protein_coding
PELI1_4	23	62334276..62475087	0.803956	1.40831	2.65427	0.0018918	0.0169311	1	ENSOMYG00000054025	ENSOMYG00000054025	protein_coding
gene:ENSOMYG00000060659	10	72677453..72745222	6.07179	1.40699	2.65183	0.000390596	0.00508193	1	ENSOMYG00000060659	ENSOMYG00000060659	protein_coding
ubl7b_1	6	64495243..64499616	43.8985	1.40624	2.65045	0.000949296	0.0100629	1	ENSOMYG00000033889	ENSOMYG00000033889	protein_coding
gene:ENSOMYG00000000411	2	32597661..32605204	10.4395	1.40559	2.64926	0.000282179	0.00393689	1	ENSOMYG00000000411	ENSOMYG00000000411	protein_coding
gene:ENSOMYG00000036257	31	8107991..8118868	5.88105	1.40394	2.64623	5.69001e-05	0.00111789	1	ENSOMYG00000036257	ENSOMYG00000036257	protein_coding
gene:ENSOMYG00000017692	11	complement(61743531..61784184)	4.26655	1.40312	2.64474	0.000267845	0.00377623	1	ENSOMYG00000017692	ENSOMYG00000017692	protein_coding
gene:ENSOMYG00000004623	3	5440470..5454483	13.2142	1.40231	2.64324	0.00170432	0.0156549	1	ENSOMYG00000004623	ENSOMYG00000004623	protein_coding
trappc2l_2	26	22599284..22600606	38.9327	1.40226	2.64315	7.85383e-05	0.00143145	1	ENSOMYG00000041458	ENSOMYG00000041458	protein_coding
atp6ap1b_1	9	complement(63720050..63724927)	5.33083	1.40225	2.64314	0.00045673	0.00570062	1	ENSOMYG00000017869	ENSOMYG00000017869	protein_coding
dstyk_1	7	complement(58591502..58618086)	3.07937	1.40197	2.64263	0.00059413	0.00694542	1	ENSOMYG00000037723	ENSOMYG00000037723	protein_coding
gene:ENSOMYG00000073197	13	68085153..68102218	5.85914	1.40132	2.64143	0.00294951	0.0238106	1	ENSOMYG00000073197	ENSOMYG00000073197	protein_coding
eaf2_2	22	36353352..36358066	17.024	1.4013	2.64139	0.00150927	0.0143392	1	ENSOMYG00000042087	ENSOMYG00000042087	protein_coding
gene:ENSOMYG00000003459	4	complement(9663456..9694837)	64.6508	1.40025	2.63947	0.00105069	0.0108928	1	ENSOMYG00000003459	ENSOMYG00000003459	protein_coding
clcn7	13	73158610..73210391	1.70892	1.40006	2.63913	0.000638076	0.00732804	1	ENSOMYG00000065949	ENSOMYG00000065949	protein_coding
gene:ENSOMYG00000073656	24	complement(10711687..10720151)	2.46525	1.39954	2.63817	0.00109877	0.0112199	1	ENSOMYG00000073656	ENSOMYG00000073656	protein_coding
gene:ENSOMYG00000015156	17	3837189..3890261	1.50971	1.39925	2.63765	0.00280113	0.0229258	1	ENSOMYG00000015156	ENSOMYG00000015156	protein_coding
rab11fip4b_2	17	complement(27374518..27471975)	2.03521	1.39797	2.6353	0.00151705	0.0143863	1	ENSOMYG00000046257	ENSOMYG00000046257	protein_coding
yju2b_1	13	11122178..11127705	4.55162	1.39789	2.63516	0.00117024	0.0117889	1	ENSOMYG00000004035	ENSOMYG00000004035	protein_coding
nbn	2	complement(15634660..15650301)	5.60765	1.3977	2.63482	0.000196352	0.00295655	1	ENSOMYG00000001649	ENSOMYG00000001649	protein_coding
dcun1d3_2	20	5854644..5859464	2.07765	1.3976	2.63463	0.00168512	0.015529	1	ENSOMYG00000015352	ENSOMYG00000015352	protein_coding
fbxo30b	4	complement(25136322..25139420)	5.53809	1.39627	2.63221	0.00111601	0.0113482	1	ENSOMYG00000016276	ENSOMYG00000016276	protein_coding
rab24	12	complement(36917825..36921074)	15.5322	1.39626	2.63218	0.000987168	0.0104037	1	ENSOMYG00000039778	ENSOMYG00000039778	protein_coding
rpl3_2	13	complement(48421636..48447995)	161.94	1.39504	2.62996	0.00181546	0.0164003	1	ENSOMYG00000071802	ENSOMYG00000071802	protein_coding
GORASP2_2	22	complement(15149533..15152779)	8.36321	1.39431	2.62863	0.000609672	0.00707542	1	ENSOMYG00000023381	ENSOMYG00000023381	protein_coding
man2b1_2	17	18262998..18281679	3.72738	1.39358	2.6273	0.000476261	0.00586439	1	ENSOMYG00000056311	ENSOMYG00000056311	protein_coding
gene:ENSOMYG00000040960	17	25893929..25928418	6.87805	1.39308	2.62639	0.000232701	0.00337802	1	ENSOMYG00000040960	ENSOMYG00000040960	protein_coding
neil1	30	complement(1157265..1164100)	9.59361	1.39237	2.62509	0.000207571	0.00309256	1	ENSOMYG00000015576	ENSOMYG00000015576	protein_coding
psmc2_1	15	complement(69223072..69227659)	100.998	1.39232	2.625	0.00220217	0.0190461	1	ENSOMYG00000008822	ENSOMYG00000008822	protein_coding
LRRC45	20	23947711..23964077	1.32099	1.39231	2.625	0.0063749	0.0421823	1	ENSOMYG00000035484	ENSOMYG00000035484	protein_coding
gene:ENSOMYG00000001798	2	15742638..15755305	35.415	1.39122	2.62301	0.000484824	0.00594633	1	ENSOMYG00000001798	ENSOMYG00000001798	protein_coding
atxn7l3b	16	complement(26346512..26380472)	8.8033	1.39078	2.6222	0.000277113	0.00387897	1	ENSOMYG00000041739	ENSOMYG00000041739	protein_coding
sde2_2	17	35838225..35847463	8.79258	1.38959	2.62004	0.000163457	0.0025471	1	ENSOMYG00000017978	ENSOMYG00000017978	protein_coding
gene:ENSOMYG00000054289	26	46603102..46674851	1.24289	1.38905	2.61907	0.00804768	0.0498322	1	ENSOMYG00000054289	ENSOMYG00000054289	protein_coding
si:dkey-221h15.4	8	complement(23953154..23955485)	30.6511	1.38892	2.61882	0.00145933	0.0139585	1	ENSOMYG00000019045	ENSOMYG00000019045	protein_coding
ATP23_2	21	complement(23969109..23976085)	12.3097	1.38804	2.61722	0.000156485	0.00246256	1	ENSOMYG00000007190	ENSOMYG00000007190	protein_coding
gene:ENSOMYG00000026821	15	complement(57052696..57058704)	5.47038	1.38798	2.61712	0.00763545	0.048039	1	ENSOMYG00000026821	ENSOMYG00000026821	protein_coding
ttc5_1	9	complement(17327867..17339852)	1.64566	1.38755	2.61633	0.000544625	0.00648912	1	ENSOMYG00000014024	ENSOMYG00000014024	protein_coding
gene:ENSOMYG00000025536	12	complement(63096529..63123537)	3.5817	1.38727	2.61583	0.00254481	0.0212977	1	ENSOMYG00000025536	ENSOMYG00000025536	protein_coding
ankra2_1	5	complement(18053149..18059872)	40.3085	1.3869	2.61517	0.000816678	0.00891309	1	ENSOMYG00000000227	ENSOMYG00000000227	protein_coding
gene:ENSOMYG00000037086	9	37380455..37422718	11.3011	1.38685	2.61508	0.000524579	0.00630634	1	ENSOMYG00000037086	ENSOMYG00000037086	protein_coding
gene:ENSOMYG00000009862	16	71709939..71738463	6.53507	1.38589	2.61333	0.000353226	0.00470143	1	ENSOMYG00000009862	ENSOMYG00000009862	protein_coding
gene:ENSOMYG00000034129	18	complement(70777890..70788088)	35.1304	1.38534	2.61233	0.000152673	0.0024145	1	ENSOMYG00000034129	ENSOMYG00000034129	protein_coding
gene:ENSOMYG00000010293	12	complement(28536905..28566281)	0.431484	1.38462	2.61102	0.00283597	0.0231366	1	ENSOMYG00000010293	ENSOMYG00000010293	protein_coding
gene:ENSOMYG00000004435	1	complement(13355960..13386774)	7.88827	1.38427	2.6104	0.000100205	0.00174875	1	ENSOMYG00000004435	ENSOMYG00000004435	protein_coding
pdcd4b_2	17	19983983..20019406	4.01932	1.38399	2.60989	0.00029847	0.00412941	1	ENSOMYG00000009912	ENSOMYG00000009912	protein_coding
gene:ENSOMYG00000018948	28	5392614..5488192	7.19225	1.38332	2.60868	0.0010691	0.0110252	1	ENSOMYG00000018948	ENSOMYG00000018948	protein_coding
rab4b_1	24	3790237..3804095	7.19005	1.38324	2.60854	0.000137054	0.00222982	1	ENSOMYG00000029382	ENSOMYG00000029382	protein_coding
IRS2_1	3	complement(69262973..69276923)	8.49048	1.38318	2.60843	0.00326064	0.0256876	1	ENSOMYG00000014988	ENSOMYG00000014988	protein_coding
zgc:112083_2	27	23804619..23809721	3.49246	1.38118	2.60482	0.00178176	0.0161968	1	ENSOMYG00000045796	ENSOMYG00000045796	protein_coding
napaa_2	Y	31761316..31770727	8.61788	1.38097	2.60444	0.000276334	0.00387233	1	ENSOMYG00000039684	ENSOMYG00000039684	protein_coding
gene:ENSOMYG00000040007	13	complement(40844058..40856452)	5.87675	1.38075	2.60405	0.000130967	0.00215977	1	ENSOMYG00000040007	ENSOMYG00000040007	protein_coding
gene:ENSOMYG00000024348	7	53530952..53546119	1.5654	1.38005	2.60277	0.00252291	0.0211658	1	ENSOMYG00000024348	ENSOMYG00000024348	protein_coding
lamp2_1	14	20239254..20259347	18.3683	1.38002	2.60272	0.000424005	0.00538791	1	ENSOMYG00000068139	ENSOMYG00000068139	protein_coding
tent4b_1	6	75474379..75494620	5.05169	1.37954	2.60186	0.000420235	0.00535805	1	ENSOMYG00000039746	ENSOMYG00000039746	protein_coding
tpcn2_1	6	complement(58113294..58136775)	12.3381	1.3794	2.60159	0.000230002	0.00334646	1	ENSOMYG00000001514	ENSOMYG00000001514	protein_coding
gene:ENSOMYG00000044207	20	complement(14528991..14544888)	5.98396	1.37913	2.60111	6.48463e-05	0.00124144	1	ENSOMYG00000044207	ENSOMYG00000044207	protein_coding
gene:ENSOMYG00000007750	13	complement(20944320..20947713)	7.26745	1.37809	2.59924	0.000397693	0.00516109	1	ENSOMYG00000007750	ENSOMYG00000007750	protein_coding
cbx8a	13	54717589..54720109	3.58543	1.37801	2.59909	0.00140444	0.01353	1	ENSOMYG00000018438	ENSOMYG00000018438	protein_coding
rela_2	21	51457399..51482606	11.4214	1.37547	2.59453	0.000171142	0.00264986	1	ENSOMYG00000031656	ENSOMYG00000031656	protein_coding
gene:ENSOMYG00000073791	21	64733899..64763935	3.14832	1.37542	2.59443	0.000230495	0.00335172	1	ENSOMYG00000073791	ENSOMYG00000073791	protein_coding
map1lc3b_2	2	65531352..65534964	121.158	1.37512	2.5939	0.00168062	0.0155043	1	ENSOMYG00000068549	ENSOMYG00000068549	protein_coding
med8_1	5	complement(78239919..78245556)	12.1294	1.37508	2.59382	0.000645436	0.00738279	1	ENSOMYG00000016002	ENSOMYG00000016002	protein_coding
cathy	17	complement(57113007..57116718)	14.8977	1.37505	2.59377	6.7109e-05	0.00127327	1	ENSOMYG00000017081	ENSOMYG00000017081	protein_coding
bet1_1	18	59644758..59647880	7.51574	1.37398	2.59184	0.000378072	0.00496112	1	ENSOMYG00000074301	ENSOMYG00000074301	protein_coding
aox5	18	complement(25935282..25960016)	1.08762	1.37369	2.59132	0.0059496	0.040087	1	ENSOMYG00000021465	ENSOMYG00000021465	protein_coding
yipf4_2	23	20204708..20207569	10.5273	1.37321	2.59046	0.000655156	0.00747383	1	ENSOMYG00000073100	ENSOMYG00000073100	protein_coding
KCNK4	10	complement(44173716..44176749)	4.73045	1.37311	2.59028	0.00690966	0.0447716	1	ENSOMYG00000033530	ENSOMYG00000033530	protein_coding
selenos_2	26	complement(45296011..45301940)	24.4298	1.37233	2.58889	0.00335337	0.0262614	1	ENSOMYG00000033848	ENSOMYG00000033848	protein_coding
smad6b	30	2812687..2861527	4.17611	1.3717	2.58776	0.000240902	0.00347133	1	ENSOMYG00000035050	ENSOMYG00000035050	protein_coding
slc31a2_1	5	complement(26276683..26285234)	14.2205	1.37164	2.58764	0.000263154	0.00372039	1	ENSOMYG00000019877	ENSOMYG00000019877	protein_coding
gene:ENSOMYG00000008513	6	complement(30537637..30553330)	3.36545	1.37051	2.58561	0.00530752	0.0369538	1	ENSOMYG00000008513	ENSOMYG00000008513	protein_coding
chfr_1	6	35234178..35245504	1.26526	1.36959	2.58398	0.00393852	0.0295993	1	ENSOMYG00000047582	ENSOMYG00000047582	protein_coding
ada2a	2	85908917..85915707	9.10306	1.36934	2.58353	0.0003095	0.00424781	1	ENSOMYG00000020523	ENSOMYG00000020523	protein_coding
gene:ENSOMYG00000030968	11	complement(49453365..49476266)	46.0962	1.36931	2.58347	0.00236371	0.0200951	1	ENSOMYG00000030968	ENSOMYG00000030968	protein_coding
gene:ENSOMYG00000012186	23	15648362..15659201	107.369	1.36802	2.58116	0.00177211	0.0161206	1	ENSOMYG00000012186	ENSOMYG00000012186	protein_coding
cog2_1	20	27281004..27291637	3.77885	1.36768	2.58055	0.000307737	0.00422861	1	ENSOMYG00000041761	ENSOMYG00000041761	protein_coding
NUP214_2	Y	23468555..23531839	2.05193	1.36727	2.57982	0.00319227	0.0252741	1	ENSOMYG00000041303	ENSOMYG00000041303	protein_coding
cd209	3	30781946..30785752	7.06434	1.3666	2.57863	0.00376241	0.0285624	1	ENSOMYG00000000828	ENSOMYG00000000828	protein_coding
myod	26	7402799..7404729	176.049	1.36536	2.57641	0.00235197	0.0200623	1	ENSOMYG00000061213	ENSOMYG00000061213	protein_coding
nfil3-6_1	12	76993943..76995109	16.4316	1.36502	2.57581	0.000441465	0.00555091	1	ENSOMYG00000027515	ENSOMYG00000027515	protein_coding
RASSF7_2	2	78468034..78519065	2.22392	1.36469	2.57521	0.0052871	0.0368721	1	ENSOMYG00000001020	ENSOMYG00000001020	protein_coding
slc15a4_2	11	53703375..53747424	8.80873	1.36451	2.57488	0.000280783	0.00392172	1	ENSOMYG00000012516	ENSOMYG00000012516	protein_coding
lrrc75bb	5	36829158..36882682	4.90538	1.36441	2.57471	0.00155693	0.0146715	1	ENSOMYG00000028932	ENSOMYG00000028932	protein_coding
foxp1a_1	9	56846061..56858016	3.02541	1.36408	2.57412	0.000741145	0.00824563	1	ENSOMYG00000042498	ENSOMYG00000042498	protein_coding
gene:ENSOMYG00000055728	13	5809703..5815416	7.65344	1.36395	2.57389	0.000145231	0.00233895	1	ENSOMYG00000055728	ENSOMYG00000055728	protein_coding
gene:ENSOMYG00000022911	5	43477198..43530108	6.0591	1.36375	2.57353	0.000754015	0.00833279	1	ENSOMYG00000022911	ENSOMYG00000022911	protein_coding
gene:ENSOMYG00000014225	8	28216215..28223673	8.34981	1.36355	2.57317	0.00797061	0.0495115	1	ENSOMYG00000014225	ENSOMYG00000014225	protein_coding
gene:ENSOMYG00000030440	24	7374609..7401633	162.727	1.36323	2.5726	0.00150867	0.0143389	1	ENSOMYG00000030440	ENSOMYG00000030440	protein_coding
gene:ENSOMYG00000023828	21	complement(24375007..24381491)	9.86633	1.3621	2.57059	0.000213776	0.00316341	1	ENSOMYG00000023828	ENSOMYG00000023828	protein_coding
fbxl4_1	2	42663825..42681555	3.95085	1.36119	2.56898	0.00206427	0.0181707	1	ENSOMYG00000000094	ENSOMYG00000000094	protein_coding
gene:ENSOMYG00000037464	14	complement(13153668..13159549)	6.87894	1.35955	2.56605	0.000915036	0.00976883	1	ENSOMYG00000037464	ENSOMYG00000037464	protein_coding
SMARCE1_2	17	complement(28638063..28644298)	3.29326	1.35887	2.56484	0.00312072	0.0248252	1	ENSOMYG00000018571	ENSOMYG00000018571	protein_coding
psme3_1	16	complement(17389377..17394162)	5.28912	1.35788	2.56309	0.000562268	0.00666874	1	ENSOMYG00000038921	ENSOMYG00000038921	protein_coding
slx9_2	18	complement(25349369..25377502)	17.7542	1.3569	2.56135	0.000134054	0.00220071	1	ENSOMYG00000020014	ENSOMYG00000020014	protein_coding
gene:ENSOMYG00000002431	2	80991988..80994790	14.4297	1.356	2.55974	0.000104565	0.00180046	1	ENSOMYG00000002431	ENSOMYG00000002431	protein_coding
gps1_1	12	complement(97918055..97949264)	6.54052	1.35481	2.55764	0.000696418	0.0078357	1	ENSOMYG00000061338	ENSOMYG00000061338	protein_coding
fbxo2	7	57051241..57052314	61.4895	1.35469	2.55742	0.00215245	0.0187369	1	ENSOMYG00000029814	ENSOMYG00000029814	protein_coding
gene:ENSOMYG00000003779	2	complement(81338925..81341694)	9.16951	1.35405	2.55629	0.000356977	0.00473794	1	ENSOMYG00000003779	ENSOMYG00000003779	protein_coding
gene:ENSOMYG00000004596	1	10096292..10128931	5.34176	1.35277	2.55403	0.000571329	0.00674105	1	ENSOMYG00000004596	ENSOMYG00000004596	protein_coding
ESYT2_3	15	complement(31238169..31287469)	14.9121	1.35202	2.55269	0.00085257	0.00922965	1	ENSOMYG00000025081	ENSOMYG00000025081	protein_coding
gene:ENSOMYG00000002039	7	65263112..65273873	32.6081	1.35202	2.55269	0.000250104	0.00357359	1	ENSOMYG00000002039	ENSOMYG00000002039	protein_coding
gene:ENSOMYG00000007192	2	complement(89081398..89099738)	6.20553	1.35179	2.55229	0.000166848	0.00259042	1	ENSOMYG00000007192	ENSOMYG00000007192	protein_coding
gene:ENSOMYG00000011707	11	complement(73269184..73282137)	7.53739	1.35129	2.5514	0.00206456	0.0181707	1	ENSOMYG00000011707	ENSOMYG00000011707	protein_coding
gene:ENSOMYG00000013551	6	complement(31654455..31656216)	16.7006	1.35078	2.5505	0.000188769	0.00287638	1	ENSOMYG00000013551	ENSOMYG00000013551	protein_coding
mib1_1	8	72780306..72869515	9.14492	1.34979	2.54875	0.000631644	0.007273	1	ENSOMYG00000044114	ENSOMYG00000044114	protein_coding
gene:ENSOMYG00000049799	17	complement(7331294..7363567)	4.57252	1.34882	2.54704	0.00561599	0.0385533	1	ENSOMYG00000049799	ENSOMYG00000049799	protein_coding
gene:ENSOMYG00000037959	22	51918483..51942408	13.4388	1.3483	2.54612	0.00151325	0.0143556	1	ENSOMYG00000037959	ENSOMYG00000037959	protein_coding
gene:ENSOMYG00000032074	18	19656199..19667924	8.48665	1.34787	2.54536	0.000103031	0.00178218	1	ENSOMYG00000032074	ENSOMYG00000032074	protein_coding
dcp2	5	9782497..9796530	28.3265	1.34695	2.54373	0.00049427	0.00602213	1	ENSOMYG00000009612	ENSOMYG00000009612	protein_coding
zgc:163098_1	10	complement(45003551..45010607)	18.421	1.3468	2.54347	0.000399802	0.00518054	1	ENSOMYG00000012979	ENSOMYG00000012979	protein_coding
gene:ENSOMYG00000035394	18	complement(5642475..5849145)	1.13135	1.34679	2.54346	0.000469225	0.00581383	1	ENSOMYG00000035394	ENSOMYG00000035394	protein_coding
gene:ENSOMYG00000023231	19	complement(39227090..39229515)	24.7916	1.34447	2.53936	0.00108529	0.0111292	1	ENSOMYG00000023231	ENSOMYG00000023231	protein_coding
gene:ENSOMYG00000060184	25	44782253..44828986	5.38445	1.34308	2.53693	0.000272753	0.00383481	1	ENSOMYG00000060184	ENSOMYG00000060184	protein_coding
calcoco1b	7	complement(63464376..63470885)	1760.13	1.34236	2.53566	0.00441359	0.0322372	1	ENSOMYG00000047246	ENSOMYG00000047246	protein_coding
gene:ENSOMYG00000009339	32	27837269..27848075	3.64225	1.34217	2.53532	0.000274423	0.00384978	1	ENSOMYG00000009339	ENSOMYG00000009339	protein_coding
svip_2	30	complement(5832983..5835938)	15.0402	1.34201	2.53504	0.00736148	0.0468984	1	ENSOMYG00000051279	ENSOMYG00000051279	protein_coding
tvp23b_1	20	complement(38965950..38971964)	20.7934	1.34113	2.53349	0.000172638	0.00266891	1	ENSOMYG00000044828	ENSOMYG00000044828	protein_coding
PAMR1_1	1	37071751..37128892	3.13984	1.34056	2.53249	0.00175952	0.0160347	1	ENSOMYG00000035588	ENSOMYG00000035588	protein_coding
sin3aa	2	53252802..53283853	3.43193	1.34039	2.5322	0.00110948	0.0113075	1	ENSOMYG00000019728	ENSOMYG00000019728	protein_coding
NUBPL	19	complement(33413375..33422261)	6.80398	1.33992	2.53138	0.00126717	0.0124912	1	ENSOMYG00000035080	ENSOMYG00000035080	protein_coding
bscl2_2	Y	29667534..29674564	2.16526	1.33963	2.53086	0.00477473	0.0341501	1	ENSOMYG00000043496	ENSOMYG00000043496	protein_coding
ercc2_2	27	13431761..13438985	7.06292	1.33908	2.5299	0.000309741	0.00424781	1	ENSOMYG00000040371	ENSOMYG00000040371	protein_coding
lipf_1	16	13464577..13482182	9.17764	1.33824	2.52842	0.00196438	0.017464	1	ENSOMYG00000013606	ENSOMYG00000013606	protein_coding
gene:ENSOMYG00000017663	16	complement(37300849..37302845)	14.3623	1.33741	2.52697	0.0027059	0.0223404	1	ENSOMYG00000017663	ENSOMYG00000017663	protein_coding
gene:ENSOMYG00000019033	9	42541366..42546529	4.38788	1.33697	2.5262	0.0051283	0.0360212	1	ENSOMYG00000019033	ENSOMYG00000019033	protein_coding
gene:ENSOMYG00000015771	19	complement(58269326..58272664)	27.0904	1.33641	2.52523	0.000659838	0.0075205	1	ENSOMYG00000015771	ENSOMYG00000015771	protein_coding
gene:ENSOMYG00000016298	8	complement(35537705..35545293)	5.94691	1.33622	2.52489	0.00156999	0.0147619	1	ENSOMYG00000016298	ENSOMYG00000016298	protein_coding
gp130	5	10283000..10300246	14.4295	1.33522	2.52314	0.000407802	0.005261	1	ENSOMYG00000031654	ENSOMYG00000031654	protein_coding
zgc:162255_2	17	complement(50932445..50939716)	4.71663	1.33417	2.52131	0.00207538	0.0182491	1	ENSOMYG00000033952	ENSOMYG00000033952	protein_coding
iip	13	25071538..25072669	49.6155	1.33394	2.52089	0.000888372	0.00954016	1	ENSOMYG00000049519	ENSOMYG00000049519	protein_coding
gene:ENSOMYG00000018157	18	complement(42088205..42093200)	6.3847	1.33322	2.51965	0.00651739	0.0428247	1	ENSOMYG00000018157	ENSOMYG00000018157	protein_coding
gene:ENSOMYG00000023819	7	complement(38170788..38199258)	7.83758	1.33272	2.51877	0.000436248	0.00549617	1	ENSOMYG00000023819	ENSOMYG00000023819	protein_coding
tlk1b_2	28	complement(8262035..8304870)	69.9646	1.3313	2.51629	0.00128295	0.0126028	1	ENSOMYG00000033688	ENSOMYG00000033688	protein_coding
dnajc17_1	19	complement(45055982..45115759)	4.83637	1.33086	2.51552	0.00161854	0.0151234	1	ENSOMYG00000022734	ENSOMYG00000022734	protein_coding
ormdl1_1	3	45204218..45207573	5.49146	1.3296	2.51334	0.00153881	0.0145331	1	ENSOMYG00000032094	ENSOMYG00000032094	protein_coding
gene:ENSOMYG00000046434	30	45359259..45378619	5.9731	1.32931	2.51282	0.00046828	0.00580494	1	ENSOMYG00000046434	ENSOMYG00000046434	protein_coding
gene:ENSOMYG00000010739	10	complement(73102466..73135356)	2.94627	1.32882	2.51196	0.000993101	0.0104527	1	ENSOMYG00000010739	ENSOMYG00000010739	protein_coding
gabarapa	10	complement(50452434..50454081)	16.5904	1.3284	2.51124	0.000867909	0.00935007	1	ENSOMYG00000023692	ENSOMYG00000023692	protein_coding
gene:ENSOMYG00000014349	1	complement(34659973..34662742)	15.228	1.32834	2.51114	0.000740712	0.00824563	1	ENSOMYG00000014349	ENSOMYG00000014349	protein_coding
bloc1s2_2	30	complement(27010867..27024085)	6.55089	1.32795	2.51046	0.000476531	0.00586439	1	ENSOMYG00000064379	ENSOMYG00000064379	protein_coding
hgs_2	13	69048838..69087878	32.4796	1.3279	2.51038	0.00633888	0.0420342	1	ENSOMYG00000051323	ENSOMYG00000051323	protein_coding
vps33b_2	26	42566262..42575880	10.9277	1.32765	2.50994	0.0016347	0.0152297	1	ENSOMYG00000018409	ENSOMYG00000018409	protein_coding
gene:ENSOMYG00000007499	4	complement(4764069..4834048)	67.9249	1.32751	2.50969	0.00273957	0.0225089	1	ENSOMYG00000007499	ENSOMYG00000007499	protein_coding
FAM53B_1	1	75155168..75182619	11.8424	1.32747	2.50963	0.000146337	0.00234785	1	ENSOMYG00000027251	ENSOMYG00000027251	protein_coding
edem1_1	7	complement(42768906..42773915)	1.8651	1.32675	2.50838	0.00448236	0.0325715	1	ENSOMYG00000010139	ENSOMYG00000010139	protein_coding
mospd1	31	complement(17801252..17806403)	17.935	1.32666	2.50821	0.000638923	0.00732804	1	ENSOMYG00000040340	ENSOMYG00000040340	protein_coding
nfil3-6_2	13	44241983..44243149	7.37625	1.32642	2.5078	0.00636429	0.042134	1	ENSOMYG00000018704	ENSOMYG00000018704	protein_coding
gene:ENSOMYG00000056241	9	complement(70523662..70532309)	4.14834	1.32623	2.50746	0.0029136	0.0236164	1	ENSOMYG00000056241	ENSOMYG00000056241	protein_coding
vps33a	6	29576133..29586870	4.30457	1.32555	2.50629	0.00101464	0.0106097	1	ENSOMYG00000002158	ENSOMYG00000002158	protein_coding
ube3c_2	15	30810420..30857369	3.49792	1.32528	2.50581	0.000858479	0.00927468	1	ENSOMYG00000023528	ENSOMYG00000023528	protein_coding
vps26a_1	20	35492542..35497519	16.9198	1.32522	2.50571	0.000224292	0.00328345	1	ENSOMYG00000038568	ENSOMYG00000038568	protein_coding
ubqln4_2	3	complement(24338462..24342672)	28.3457	1.32511	2.50552	0.00464308	0.0333961	1	ENSOMYG00000004399	ENSOMYG00000004399	protein_coding
gene:ENSOMYG00000040452	12	64472432..64475407	24.2447	1.32504	2.5054	0.000200361	0.00300447	1	ENSOMYG00000040452	ENSOMYG00000040452	protein_coding
gene:ENSOMYG00000034216	6	12888604..12895497	8.80554	1.32239	2.5008	0.000174135	0.00268554	1	ENSOMYG00000034216	ENSOMYG00000034216	protein_coding
gene:ENSOMYG00000071719	1	90722735..90742606	96.5327	1.32227	2.50059	0.00207633	0.0182491	1	ENSOMYG00000071719	ENSOMYG00000071719	protein_coding
nagpa_1	2	complement(30782296..30799621)	1.91274	1.32058	2.49767	0.00195367	0.0173931	1	ENSOMYG00000005708	ENSOMYG00000005708	protein_coding
gene:ENSOMYG00000027681	2	complement(103330944..103334701)	13.84	1.32037	2.49731	0.0004211	0.00536639	1	ENSOMYG00000027681	ENSOMYG00000027681	protein_coding
gene:ENSOMYG00000002383	5	58911710..58935941	20.1431	1.31974	2.49622	0.0012087	0.0120927	1	ENSOMYG00000002383	ENSOMYG00000002383	protein_coding
nxf1a	14	26912569..26930781	12.4405	1.31948	2.49576	0.00037479	0.00492664	1	ENSOMYG00000009637	ENSOMYG00000009637	protein_coding
gene:ENSOMYG00000011132	8	complement(53595270..53624551)	6.17938	1.3188	2.49458	0.000330244	0.00446554	1	ENSOMYG00000011132	ENSOMYG00000011132	protein_coding
ednraa_1	10	complement(67590024..67632232)	4.80619	1.31797	2.49315	0.00138562	0.0133943	1	ENSOMYG00000011025	ENSOMYG00000011025	protein_coding
cops2_1	2	99166330..99180491	26.9661	1.31764	2.49258	0.000416224	0.00533361	1	ENSOMYG00000001774	ENSOMYG00000001774	protein_coding
ZC3H3_2	30	complement(36284847..36368970)	2.80462	1.31752	2.49237	0.00105574	0.0109318	1	ENSOMYG00000033628	ENSOMYG00000033628	protein_coding
gene:ENSOMYG00000042444	27	complement(17199978..17207342)	2.37919	1.31694	2.49137	0.00348186	0.0269632	1	ENSOMYG00000042444	ENSOMYG00000042444	protein_coding
SNX11	16	18457586..18476489	5.18996	1.31619	2.49008	0.00422438	0.031096	1	ENSOMYG00000043658	ENSOMYG00000043658	protein_coding
gene:ENSOMYG00000043842	Y	complement(5071229..5124641)	8.24139	1.31615	2.49	0.000352212	0.00469038	1	ENSOMYG00000043842	ENSOMYG00000043842	protein_coding
LRRK1_2	26	45071691..45185334	3.9854	1.3151	2.48819	0.00232381	0.0198486	1	ENSOMYG00000053577	ENSOMYG00000053577	protein_coding
gene:ENSOMYG00000043556	14	13897755..13911988	6.83648	1.31495	2.48794	0.000218161	0.00320347	1	ENSOMYG00000043556	ENSOMYG00000043556	protein_coding
supt5h_1	24	complement(7129168..7150207)	14.7521	1.31479	2.48766	0.000666111	0.0075649	1	ENSOMYG00000026492	ENSOMYG00000026492	protein_coding
gene:ENSOMYG00000013708	10	complement(45685456..45697123)	7.86272	1.31454	2.48722	0.00123522	0.0122569	1	ENSOMYG00000013708	ENSOMYG00000013708	protein_coding
CREB1_1	7	complement(8912672..8918560)	25.2759	1.31435	2.4869	0.00111589	0.0113482	1	ENSOMYG00000063496	ENSOMYG00000063496	protein_coding
snx14_2	8	complement(16246588..16270889)	3.34322	1.31312	2.48478	0.00128586	0.0126206	1	ENSOMYG00000031225	ENSOMYG00000031225	protein_coding
glb1l	22	51732727..51827412	4.48943	1.31281	2.48424	0.00172024	0.0157613	1	ENSOMYG00000050634	ENSOMYG00000050634	protein_coding
gene:ENSOMYG00000066880	13	complement(8225857..8250354)	3.60401	1.31198	2.48281	0.0010646	0.0110011	1	ENSOMYG00000066880	ENSOMYG00000066880	protein_coding
zgc:112052	1	42096521..42108785	12.8952	1.31114	2.48138	0.00783719	0.0489243	1	ENSOMYG00000001114	ENSOMYG00000001114	protein_coding
tmem205_2	13	complement(44045940..44047096)	8.21051	1.30976	2.47901	0.00173486	0.0158497	1	ENSOMYG00000018555	ENSOMYG00000018555	protein_coding
gene:ENSOMYG00000014470	19	60557050..60569000	5.60354	1.30946	2.47848	0.00149627	0.0142542	1	ENSOMYG00000014470	ENSOMYG00000014470	protein_coding
gene:ENSOMYG00000004065	1	complement(13258513..13268419)	2.97421	1.30939	2.47837	0.000525747	0.0063129	1	ENSOMYG00000004065	ENSOMYG00000004065	protein_coding
gene:ENSOMYG00000031267	31	complement(28137653..28152807)	18.6893	1.30902	2.47774	0.000326536	0.00442483	1	ENSOMYG00000031267	ENSOMYG00000031267	protein_coding
C19orf12_1	6	59851170..59859954	29.2457	1.30897	2.47765	0.000195927	0.00295298	1	ENSOMYG00000002908	ENSOMYG00000002908	protein_coding
slc31a1_2	Y	14015137..14026644	3.76861	1.30786	2.47575	0.00620255	0.0413673	1	ENSOMYG00000032732	ENSOMYG00000032732	protein_coding
gene:ENSOMYG00000042333	8	complement(49122719..49139986)	5.6123	1.30756	2.47523	0.000748925	0.00828733	1	ENSOMYG00000042333	ENSOMYG00000042333	protein_coding
nr1h3_1	6	56332705..56355234	5.35619	1.30753	2.47518	0.000459155	0.00572527	1	ENSOMYG00000013850	ENSOMYG00000013850	protein_coding
fra10ac1	20	13191442..13206455	5.84662	1.30746	2.47505	0.00239884	0.0203259	1	ENSOMYG00000021968	ENSOMYG00000021968	protein_coding
scpep1_2	13	complement(70291776..70305864)	7.49554	1.30649	2.4734	0.00312094	0.0248252	1	ENSOMYG00000014471	ENSOMYG00000014471	protein_coding
gene:ENSOMYG00000014889	12	7912751..7968990	59.1703	1.30547	2.47164	0.00457643	0.0330661	1	ENSOMYG00000014889	ENSOMYG00000014889	protein_coding
gene:ENSOMYG00000010109	20	complement(8197781..8206798)	5.58402	1.30513	2.47106	0.00106594	0.0110105	1	ENSOMYG00000010109	ENSOMYG00000010109	protein_coding
gene:ENSOMYG00000050405	10	69478119..69498111	7.36335	1.30471	2.47034	0.000573689	0.00676263	1	ENSOMYG00000050405	ENSOMYG00000050405	protein_coding
gene:ENSOMYG00000005522	32	complement(21176731..21187934)	54.2693	1.30354	2.46833	0.00332662	0.026108	1	ENSOMYG00000005522	ENSOMYG00000005522	protein_coding
ZNF143_2	26	34624660..34636264	14.3405	1.30306	2.46751	0.000253646	0.00361812	1	ENSOMYG00000041439	ENSOMYG00000041439	protein_coding
alg11	18	27820671..27830682	7.64055	1.30235	2.46631	0.000377791	0.00496112	1	ENSOMYG00000034204	ENSOMYG00000034204	protein_coding
zgc:63882_1	8	71828497..71832100	7.34691	1.30226	2.46615	0.00584801	0.0396438	1	ENSOMYG00000028745	ENSOMYG00000028745	protein_coding
gene:ENSOMYG00000042345	27	2688868..2750927	4.20427	1.30214	2.46595	0.000701203	0.00787789	1	ENSOMYG00000042345	ENSOMYG00000042345	protein_coding
cu051	7	complement(13090354..13092775)	40.8288	1.30128	2.46447	0.00131329	0.0128069	1	ENSOMYG00000068238	ENSOMYG00000068238	protein_coding
tmem86a	2	complement(46875323..46921467)	2.48624	1.30122	2.46437	0.00552539	0.0380545	1	ENSOMYG00000011794	ENSOMYG00000011794	protein_coding
mettl5	22	15354555..15357292	29.7234	1.3007	2.46348	0.00146422	0.0139947	1	ENSOMYG00000025924	ENSOMYG00000025924	protein_coding
gene:ENSOMYG00000029456	2	35188629..35189798	6.81348	1.29993	2.46218	0.00407493	0.0303735	1	ENSOMYG00000029456	ENSOMYG00000029456	protein_coding
btbd10a_1	1	45093893..45115813	11.8459	1.29625	2.4559	0.000485689	0.00595407	1	ENSOMYG00000018828	ENSOMYG00000018828	protein_coding
ctsk_1	2	complement(32498790..32504951)	43.9997	1.29574	2.45502	0.00292973	0.0237041	1	ENSOMYG00000000261	ENSOMYG00000000261	protein_coding
gene:ENSOMYG00000023569	6	complement(93665031..93672180)	50.0842	1.29573	2.45501	0.00654996	0.0429611	1	ENSOMYG00000023569	ENSOMYG00000023569	protein_coding
usp30	11	60497657..60506433	11.9875	1.29567	2.45491	0.000155865	0.00245584	1	ENSOMYG00000005899	ENSOMYG00000005899	protein_coding
gene:ENSOMYG00000005272	1	complement(68449546..68459653)	26.3683	1.29491	2.45361	0.000342709	0.00459348	1	ENSOMYG00000005272	ENSOMYG00000005272	protein_coding
psmd4b_2	3	7080579..7084301	112.69	1.29375	2.45165	0.00580574	0.0394412	1	ENSOMYG00000032932	ENSOMYG00000032932	protein_coding
gene:ENSOMYG00000039837	8	13390815..13410017	5.45132	1.29325	2.45079	0.000303315	0.0041826	1	ENSOMYG00000039837	ENSOMYG00000039837	protein_coding
gene:ENSOMYG00000042524	9	complement(56873628..56907086)	10.4969	1.29323	2.45076	0.00454641	0.0328865	1	ENSOMYG00000042524	ENSOMYG00000042524	protein_coding
casd1_1	18	complement(59474683..59487079)	3.27537	1.2924	2.44935	0.000710778	0.00796594	1	ENSOMYG00000008927	ENSOMYG00000008927	protein_coding
pheta2_1	12	82069154..82071033	5.66753	1.29202	2.44871	0.0065671	0.0430625	1	ENSOMYG00000048317	ENSOMYG00000048317	protein_coding
gene:ENSOMYG00000064311	9	complement(71158887..71175905)	0.958907	1.29186	2.44844	0.0060473	0.0406056	1	ENSOMYG00000064311	ENSOMYG00000064311	protein_coding
kdm1a_2	25	complement(7607710..7633911)	4.16336	1.29173	2.44821	0.000594379	0.00694542	1	ENSOMYG00000020905	ENSOMYG00000020905	protein_coding
gene:ENSOMYG00000016526	32	18323980..18447127	2.18569	1.29172	2.44819	0.00203513	0.0179863	1	ENSOMYG00000016526	ENSOMYG00000016526	protein_coding
gene:ENSOMYG00000021253	19	complement(59024863..59060993)	1.82778	1.28998	2.44525	0.00107165	0.0110382	1	ENSOMYG00000021253	ENSOMYG00000021253	protein_coding
PLEKHM3_1	3	complement(55073046..55119876)	3.20309	1.28991	2.44513	0.00212466	0.0185504	1	ENSOMYG00000015759	ENSOMYG00000015759	protein_coding
znf143b	30	complement(9307479..9316102)	5.35856	1.28941	2.44429	0.00120953	0.0120962	1	ENSOMYG00000033424	ENSOMYG00000033424	protein_coding
ppm1kb_1	10	69294659..69302100	7.74865	1.28918	2.44389	0.00135505	0.0131307	1	ENSOMYG00000047956	ENSOMYG00000047956	protein_coding
gene:ENSOMYG00000047373	17	59857327..59859734	10.7064	1.289	2.44358	0.00118653	0.011913	1	ENSOMYG00000047373	ENSOMYG00000047373	protein_coding
mknk1	1	13104690..13113607	14.8288	1.2883	2.4424	0.00242972	0.0205192	1	ENSOMYG00000003938	ENSOMYG00000003938	protein_coding
gene:ENSOMYG00000046994	6	complement(28356225..28362991)	40.2386	1.28769	2.44138	0.00521435	0.0365002	1	ENSOMYG00000046994	ENSOMYG00000046994	protein_coding
gene:ENSOMYG00000023318	12	59981030..60009787	4.68739	1.28711	2.44038	0.000631839	0.007273	1	ENSOMYG00000023318	ENSOMYG00000023318	protein_coding
btbd9	26	complement(12675811..12688086)	7.82193	1.28598	2.43848	0.000684461	0.00774567	1	ENSOMYG00000039072	ENSOMYG00000039072	protein_coding
nt5dc2_2	16	complement(52964099..52997474)	15.2871	1.2836	2.43445	0.000274345	0.00384978	1	ENSOMYG00000011687	ENSOMYG00000011687	protein_coding
cactin_2	28	7630826..7641272	5.67677	1.28328	2.43392	0.000145892	0.00234366	1	ENSOMYG00000027464	ENSOMYG00000027464	protein_coding
vps35_2	26	19892412..19906869	17.7111	1.28204	2.43182	0.0010674	0.0110167	1	ENSOMYG00000046710	ENSOMYG00000046710	protein_coding
gene:ENSOMYG00000012799	2	66375816..66421730	5.31871	1.28123	2.43046	0.000466039	0.00578279	1	ENSOMYG00000012799	ENSOMYG00000012799	protein_coding
gene:ENSOMYG00000057812	23	3711338..3779634	6.12499	1.28095	2.42999	0.000721393	0.00806327	1	ENSOMYG00000057812	ENSOMYG00000057812	protein_coding
gene:ENSOMYG00000037609	13	31687468..31690199	24.7786	1.28042	2.4291	0.00044061	0.00554289	1	ENSOMYG00000037609	ENSOMYG00000037609	protein_coding
TCAIM_1	2	complement(13087062..13093504)	4.0908	1.27975	2.42797	0.00208192	0.0182918	1	ENSOMYG00000018734	ENSOMYG00000018734	protein_coding
hat1	3	49416282..49429689	33.603	1.27933	2.42726	0.00074653	0.00827821	1	ENSOMYG00000016767	ENSOMYG00000016767	protein_coding
gene:ENSOMYG00000044692	7	complement(71385169..71391917)	4.28313	1.27924	2.42711	0.00048283	0.00593045	1	ENSOMYG00000044692	ENSOMYG00000044692	protein_coding
gene:ENSOMYG00000046050	17	26758257..26797596	1.50698	1.27921	2.42705	0.00305276	0.0244355	1	ENSOMYG00000046050	ENSOMYG00000046050	protein_coding
MSL3_2	18	complement(21165260..21173811)	4.71561	1.27901	2.42672	0.000494455	0.00602213	1	ENSOMYG00000023369	ENSOMYG00000023369	protein_coding
gene:ENSOMYG00000045949	21	49593017..49605887	6.94808	1.27852	2.42591	0.00025786	0.00366656	1	ENSOMYG00000045949	ENSOMYG00000045949	protein_coding
gene:ENSOMYG00000023600	8	56563862..56575969	8.94884	1.27814	2.42526	0.000736998	0.00821964	1	ENSOMYG00000023600	ENSOMYG00000023600	protein_coding
gene:ENSOMYG00000017304	9	complement(3165350..3202015)	3.11214	1.27755	2.42427	0.00050875	0.00616261	1	ENSOMYG00000017304	ENSOMYG00000017304	protein_coding
gene:ENSOMYG00000043764	24	14001774..14015985	8.16857	1.2772	2.42368	0.000568801	0.00672681	1	ENSOMYG00000043764	ENSOMYG00000043764	protein_coding
ITGA11	2	54364977..54455073	4.94471	1.27692	2.42321	0.000538426	0.00643634	1	ENSOMYG00000033280	ENSOMYG00000033280	protein_coding
RHOB	4	complement(7691377..7691967)	11.0286	1.27439	2.41896	0.00204184	0.018033	1	ENSOMYG00000000043	ENSOMYG00000000043	protein_coding
sap130a	5	96949048..96988177	3.53544	1.27354	2.41754	0.000743792	0.00826135	1	ENSOMYG00000001363	ENSOMYG00000001363	protein_coding
zgc:174904_1	18	complement(39389208..39413622)	17.6212	1.27347	2.41742	0.000320379	0.00435764	1	ENSOMYG00000046729	ENSOMYG00000046729	protein_coding
gene:ENSOMYG00000007793	16	complement(18939259..18950047)	10.1358	1.27273	2.41619	0.000546319	0.00650626	1	ENSOMYG00000007793	ENSOMYG00000007793	protein_coding
gene:ENSOMYG00000016003	12	96124580..96138578	3.02828	1.27189	2.41477	0.00126207	0.0124626	1	ENSOMYG00000016003	ENSOMYG00000016003	protein_coding
gene:ENSOMYG00000018815	20	6637629..6654282	2.13497	1.27148	2.41409	0.00740068	0.0470294	1	ENSOMYG00000018815	ENSOMYG00000018815	protein_coding
gene:ENSOMYG00000045509	26	complement(23935726..23998122)	0.844273	1.27055	2.41254	0.00219202	0.0189841	1	ENSOMYG00000045509	ENSOMYG00000045509	protein_coding
mgrn1b_2	13	40397541..40403757	2.83122	1.26972	2.41115	0.00384669	0.0290426	1	ENSOMYG00000032413	ENSOMYG00000032413	protein_coding
KIAA0232	21	complement(55073623..55086236)	11.8617	1.26943	2.41067	0.00268154	0.022168	1	ENSOMYG00000022849	ENSOMYG00000022849	protein_coding
stx17_2	3	6129372..6156348	10.111	1.26803	2.40833	0.000774459	0.00850923	1	ENSOMYG00000000300	ENSOMYG00000000300	protein_coding
GALNT11	11	13060523..13093484	4.30935	1.26799	2.40826	0.00223752	0.0192863	1	ENSOMYG00000023769	ENSOMYG00000023769	protein_coding
gene:ENSOMYG00000040067	8	61054991..61086610	1.73854	1.26718	2.4069	0.00271298	0.0223698	1	ENSOMYG00000040067	ENSOMYG00000040067	protein_coding
gene:ENSOMYG00000036526	5	complement(46573660..46604657)	8.43477	1.26681	2.4063	0.000686698	0.00776081	1	ENSOMYG00000036526	ENSOMYG00000036526	protein_coding
gene:ENSOMYG00000036249	31	8104795..8106974	24.7457	1.26594	2.40484	0.00025943	0.00368	1	ENSOMYG00000036249	ENSOMYG00000036249	protein_coding
gene:ENSOMYG00000022015	16	9092553..9107407	1.10945	1.26592	2.4048	0.00634755	0.0420669	1	ENSOMYG00000022015	ENSOMYG00000022015	protein_coding
ccdc6a_2	23	complement(28204706..28227386)	17.1602	1.26586	2.40471	0.00162391	0.0151513	1	ENSOMYG00000043008	ENSOMYG00000043008	protein_coding
ACKR3	18	complement(11353427..11357759)	5.91256	1.26432	2.40214	0.000883754	0.00949457	1	ENSOMYG00000062182	ENSOMYG00000062182	protein_coding
gene:ENSOMYG00000037394	24	10410835..10527641	13.1055	1.26396	2.40154	0.00591341	0.0399065	1	ENSOMYG00000037394	ENSOMYG00000037394	protein_coding
TRAPPC11	31	complement(18866621..18882420)	12.2485	1.26388	2.4014	0.000772628	0.0085007	1	ENSOMYG00000043742	ENSOMYG00000043742	protein_coding
gene:ENSOMYG00000034158	19	complement(40956126..40959488)	52.1317	1.26375	2.40119	0.000417958	0.00534767	1	ENSOMYG00000034158	ENSOMYG00000034158	protein_coding
gene:ENSOMYG00000034484	17	58070223..58130175	4.50646	1.26369	2.40109	0.00085768	0.00927314	1	ENSOMYG00000034484	ENSOMYG00000034484	protein_coding
gene:ENSOMYG00000009571	17	84732635..84879259	1.18478	1.26335	2.40053	0.00372287	0.0283292	1	ENSOMYG00000009571	ENSOMYG00000009571	protein_coding
gene:ENSOMYG00000077275	18	61666612..61687917	45.0705	1.26259	2.39925	0.00209207	0.0183684	1	ENSOMYG00000077275	ENSOMYG00000077275	protein_coding
fbxo8_1	10	65701055..65709086	3.4467	1.26245	2.39903	0.00280469	0.0229402	1	ENSOMYG00000007223	ENSOMYG00000007223	protein_coding
gene:ENSOMYG00000041335	13	complement(33616972..33625694)	300.322	1.2617	2.39778	0.00280386	0.0229402	1	ENSOMYG00000041335	ENSOMYG00000041335	protein_coding
gene:ENSOMYG00000029013	7	complement(47865545..47879974)	8.6638	1.26045	2.3957	0.00117576	0.0118329	1	ENSOMYG00000029013	ENSOMYG00000029013	protein_coding
gene:ENSOMYG00000044721	1	53060159..53071740	7.97847	1.25972	2.3945	0.00086494	0.00933182	1	ENSOMYG00000044721	ENSOMYG00000044721	protein_coding
fbxl4_2	3	34023396..34039357	3.43193	1.25853	2.39251	0.00165441	0.0153404	1	ENSOMYG00000007888	ENSOMYG00000007888	protein_coding
gene:ENSOMYG00000056971	6	complement(44365990..44394326)	13.9677	1.25819	2.39196	0.00103925	0.0107959	1	ENSOMYG00000056971	ENSOMYG00000056971	protein_coding
gene:ENSOMYG00000067889	6	28543175..28552163	2.9002	1.2578	2.39131	0.00199152	0.0176788	1	ENSOMYG00000067889	ENSOMYG00000067889	protein_coding
gene:ENSOMYG00000060163	18	18845026..18848434	14.0771	1.25676	2.38959	0.00633942	0.0420342	1	ENSOMYG00000060163	ENSOMYG00000060163	protein_coding
IGDCC4	6	complement(63954820..64013895)	2.80657	1.25644	2.38905	0.00105179	0.0108998	1	ENSOMYG00000033807	ENSOMYG00000033807	protein_coding
nfkb2_2	23	complement(18244433..18253132)	7.99372	1.2564	2.38898	0.000811083	0.00886343	1	ENSOMYG00000040602	ENSOMYG00000040602	protein_coding
gene:ENSOMYG00000056103	20	45325089..45442655	0.878428	1.25613	2.38855	0.00394914	0.0296446	1	ENSOMYG00000056103	ENSOMYG00000056103	protein_coding
gene:ENSOMYG00000041961	6	complement(32883692..32923973)	4.6241	1.25607	2.38845	0.00646526	0.0425701	1	ENSOMYG00000041961	ENSOMYG00000041961	protein_coding
OSBPL1A_3	28	17197102..17235652	6.6776	1.25583	2.38804	0.00411696	0.0305615	1	ENSOMYG00000035356	ENSOMYG00000035356	protein_coding
vgll2b_1	19	complement(56824935..56836514)	94.2092	1.25561	2.38769	0.00413896	0.0306794	1	ENSOMYG00000054970	ENSOMYG00000054970	protein_coding
LRRC58_1	3	67982609..67989950	6.11299	1.2556	2.38767	0.000740309	0.00824563	1	ENSOMYG00000014581	ENSOMYG00000014581	protein_coding
gene:ENSOMYG00000040926	27	35157241..35163204	1.5132	1.25509	2.38682	0.00735724	0.0468912	1	ENSOMYG00000040926	ENSOMYG00000040926	protein_coding
gene:ENSOMYG00000004369	12	16582801..16595110	3.84966	1.25386	2.38478	0.00167295	0.0154616	1	ENSOMYG00000004369	ENSOMYG00000004369	protein_coding
sugct_2	15	complement(32121742..32286698)	3.24261	1.25247	2.38248	0.0013642	0.0132073	1	ENSOMYG00000029388	ENSOMYG00000029388	protein_coding
gene:ENSOMYG00000034537	5	80873894..81230671	7.11591	1.25138	2.3807	0.000741189	0.00824563	1	ENSOMYG00000034537	ENSOMYG00000034537	protein_coding
ZRANB1_2	23	complement(6747711..6803568)	13.4621	1.25125	2.38047	0.00107453	0.0110633	1	ENSOMYG00000062090	ENSOMYG00000062090	protein_coding
TBC1D31	2	5173048..5226609	3.60592	1.2494	2.37742	0.000577162	0.00679413	1	ENSOMYG00000026143	ENSOMYG00000026143	protein_coding
gene:ENSOMYG00000075855	25	37324591..37361368	53.5214	1.24936	2.37736	0.00341018	0.0265535	1	ENSOMYG00000075855	ENSOMYG00000075855	protein_coding
gene:ENSOMYG00000007322	16	complement(42409841..42415085)	36.7273	1.24932	2.37729	0.00102957	0.0107394	1	ENSOMYG00000007322	ENSOMYG00000007322	protein_coding
gene:ENSOMYG00000053055	24	complement(1088484..1090986)	17.6403	1.24924	2.37716	0.00114633	0.0116101	1	ENSOMYG00000053055	ENSOMYG00000053055	protein_coding
SP1	17	86698814..86709394	6.29055	1.24898	2.37674	0.00128959	0.0126444	1	ENSOMYG00000030362	ENSOMYG00000030362	protein_coding
atosa_1	6	79555519..79570218	4.95605	1.24882	2.37647	0.00197782	0.0175652	1	ENSOMYG00000027533	ENSOMYG00000027533	protein_coding
ccdc127a	2	5306959..5310350	20.5512	1.24847	2.37589	0.000696774	0.00783625	1	ENSOMYG00000049423	ENSOMYG00000049423	protein_coding
PM20D2_2	25	complement(8215363..8220648)	7.52536	1.24775	2.3747	0.0016997	0.0156376	1	ENSOMYG00000022452	ENSOMYG00000022452	protein_coding
gene:ENSOMYG00000006355	14	complement(27202315..27220175)	3.59678	1.24527	2.37062	0.0013407	0.0130194	1	ENSOMYG00000006355	ENSOMYG00000006355	protein_coding
gene:ENSOMYG00000031116	6	95597621..95612221	22.8393	1.24452	2.36939	0.00154994	0.0146219	1	ENSOMYG00000031116	ENSOMYG00000031116	protein_coding
C19orf12_2	26	complement(20482365..20486079)	10.9417	1.2445	2.36936	0.000679062	0.00769825	1	ENSOMYG00000071363	ENSOMYG00000071363	protein_coding
spns1_1	12	complement(61850404..61866352)	5.10025	1.24449	2.36935	0.000639588	0.00733137	1	ENSOMYG00000018667	ENSOMYG00000018667	protein_coding
psmd4b_1	2	15783700..15787405	78.2563	1.2437	2.36805	0.00617375	0.0412288	1	ENSOMYG00000002085	ENSOMYG00000002085	protein_coding
SYAP1	7	1326583..1333870	29.8245	1.24328	2.36736	0.000566906	0.00670751	1	ENSOMYG00000008962	ENSOMYG00000008962	protein_coding
gene:ENSOMYG00000052686	21	2588145..2667340	1.68783	1.24313	2.36712	0.00578994	0.0393851	1	ENSOMYG00000052686	ENSOMYG00000052686	protein_coding
gene:ENSOMYG00000071828	30	6885469..6896128	4.98832	1.24287	2.3667	0.00116083	0.0117244	1	ENSOMYG00000071828	ENSOMYG00000071828	protein_coding
hspb6	2	complement(23276980..23277941)	61.2872	1.24236	2.36585	0.00368616	0.0281346	1	ENSOMYG00000025454	ENSOMYG00000025454	protein_coding
gene:ENSOMYG00000056898	13	68160915..68493840	10.646	1.24229	2.36574	0.00741033	0.0470556	1	ENSOMYG00000056898	ENSOMYG00000056898	protein_coding
gene:ENSOMYG00000049395	22	19301560..19307972	3.15797	1.24226	2.36568	0.00754979	0.0476472	1	ENSOMYG00000049395	ENSOMYG00000049395	protein_coding
abcb6a_1	7	complement(25372640..25398232)	4.65071	1.24196	2.3652	0.00174306	0.0159017	1	ENSOMYG00000008750	ENSOMYG00000008750	protein_coding
gene:ENSOMYG00000050454	26	complement(7926763..7937707)	175.61	1.24167	2.36473	0.00221462	0.0191277	1	ENSOMYG00000050454	ENSOMYG00000050454	protein_coding
get1	27	complement(24249560..24257854)	10.3019	1.24059	2.36295	0.000250746	0.00358076	1	ENSOMYG00000072139	ENSOMYG00000072139	protein_coding
prrg1	5	complement(53942883..53944706)	6.55998	1.23943	2.36105	0.00515605	0.0361762	1	ENSOMYG00000013025	ENSOMYG00000013025	protein_coding
gene:ENSOMYG00000036094	5	46498369..46545859	5.33283	1.23931	2.36086	0.000417775	0.00534767	1	ENSOMYG00000036094	ENSOMYG00000036094	protein_coding
vps16_1	7	6806050..6834350	3.32275	1.23803	2.35876	0.00273124	0.0224694	1	ENSOMYG00000008526	ENSOMYG00000008526	protein_coding
arg2	25	complement(43092300..43110197)	37.0531	1.23712	2.35728	0.00318311	0.0252173	1	ENSOMYG00000037334	ENSOMYG00000037334	protein_coding
usp1	5	complement(87507650..87519038)	9.1707	1.23698	2.35704	0.00274789	0.0225626	1	ENSOMYG00000007613	ENSOMYG00000007613	protein_coding
atg13_2	26	17741962..17752976	23.1605	1.23664	2.35649	0.00262229	0.0217843	1	ENSOMYG00000042276	ENSOMYG00000042276	protein_coding
dcaf5_1	19	62604758..62636336	6.80755	1.23637	2.35604	0.000643855	0.00737464	1	ENSOMYG00000058214	ENSOMYG00000058214	protein_coding
hs2st1a_1	8	52819473..52849793	7.41177	1.23592	2.35531	0.00443908	0.0323955	1	ENSOMYG00000009479	ENSOMYG00000009479	protein_coding
fbxo7_2	21	complement(7902267..7923832)	7.58229	1.23444	2.35289	0.00296239	0.0238704	1	ENSOMYG00000052484	ENSOMYG00000052484	protein_coding
vps28_2	32	complement(15938136..15945024)	17.0383	1.23423	2.35255	0.000763425	0.00841486	1	ENSOMYG00000011390	ENSOMYG00000011390	protein_coding
HLCS	12	38773726..38848201	3.15995	1.23333	2.35108	0.000597756	0.006974	1	ENSOMYG00000031960	ENSOMYG00000031960	protein_coding
mgll_1	9	complement(40845080..40865104)	92.3534	1.23203	2.34897	0.0025757	0.0214954	1	ENSOMYG00000047714	ENSOMYG00000047714	protein_coding
rorca_2	30	complement(18923947..18943844)	5.63403	1.23152	2.34814	0.000783906	0.00860336	1	ENSOMYG00000000914	ENSOMYG00000000914	protein_coding
trappc13_2	Y	complement(14970166..15000491)	2.29699	1.23072	2.34684	0.0041504	0.0307291	1	ENSOMYG00000038104	ENSOMYG00000038104	protein_coding
ZNF654_2	22	28035627..28051845	3.17145	1.23066	2.34674	0.000465419	0.00577792	1	ENSOMYG00000028716	ENSOMYG00000028716	protein_coding
TEAD1_2	26	complement(26076993..26134935)	4.73491	1.23063	2.34669	0.00106319	0.0109911	1	ENSOMYG00000026284	ENSOMYG00000026284	protein_coding
vps41_2	15	27936329..27951727	9.86375	1.23013	2.34589	0.000449661	0.00562867	1	ENSOMYG00000020466	ENSOMYG00000020466	protein_coding
pitpnb	12	17482782..17498939	9.36913	1.23002	2.3457	0.00539766	0.0373872	1	ENSOMYG00000018388	ENSOMYG00000018388	protein_coding
brms1la	25	complement(27854633..27858001)	4.80456	1.22966	2.34511	0.0019175	0.017107	1	ENSOMYG00000045301	ENSOMYG00000045301	protein_coding
daxx_2	32	33465602..33478521	1.87813	1.22821	2.34276	0.00307731	0.0245856	1	ENSOMYG00000025553	ENSOMYG00000025553	protein_coding
dpp7	6	21444781..21451365	17.1353	1.22613	2.33939	0.00164426	0.0152821	1	ENSOMYG00000017676	ENSOMYG00000017676	protein_coding
slc5a6b	25	complement(37222108..37236811)	4.55372	1.22572	2.33873	0.00159683	0.0149632	1	ENSOMYG00000045615	ENSOMYG00000045615	protein_coding
MAN2B2	21	complement(55121005..55131830)	5.02797	1.22495	2.33747	0.00107005	0.0110261	1	ENSOMYG00000023014	ENSOMYG00000023014	protein_coding
gene:ENSOMYG00000020145	5	complement(42163853..42258073)	7.35442	1.22427	2.33637	0.000462583	0.00575408	1	ENSOMYG00000020145	ENSOMYG00000020145	protein_coding
actc2_2	8	complement(31432389..31434781)	124.908	1.22405	2.33602	0.00408148	0.0304134	1	ENSOMYG00000030667	ENSOMYG00000030667	protein_coding
asb5a_2	31	complement(37811643..37815949)	26.2452	1.22399	2.33591	0.00216931	0.0188526	1	ENSOMYG00000037726	ENSOMYG00000037726	protein_coding
tmem106ba_2	3	26049265..26055864	23.2787	1.22285	2.33407	0.00113898	0.0115495	1	ENSOMYG00000011489	ENSOMYG00000011489	protein_coding
ACOT9_1	11	16410054..16432712	9.71166	1.22185	2.33246	0.00166089	0.0153848	1	ENSOMYG00000040549	ENSOMYG00000040549	protein_coding
ctns_1	1	19637169..19641886	6.73812	1.22173	2.33226	0.00191283	0.0170773	1	ENSOMYG00000001351	ENSOMYG00000001351	protein_coding
tmpob_1	1	52883283..52889375	1.71279	1.22129	2.33154	0.00577717	0.0393315	1	ENSOMYG00000044670	ENSOMYG00000044670	protein_coding
gene:ENSOMYG00000071421	12	complement(91036654..91041117)	1.71274	1.22125	2.33149	0.00227871	0.0195883	1	ENSOMYG00000071421	ENSOMYG00000071421	protein_coding
gene:ENSOMYG00000000809	4	complement(7982794..8006081)	2.12296	1.22042	2.33015	0.00541367	0.0374641	1	ENSOMYG00000000809	ENSOMYG00000000809	protein_coding
med6	19	63141510..63151774	11.4117	1.22015	2.32972	0.00166891	0.0154354	1	ENSOMYG00000005649	ENSOMYG00000005649	protein_coding
akirin1_2	3	28304133..28321670	16.4085	1.21986	2.32924	0.00126617	0.0124861	1	ENSOMYG00000009097	ENSOMYG00000009097	protein_coding
retreg2_1	7	complement(25347861..25358651)	10.1283	1.21975	2.32906	0.00156683	0.0147384	1	ENSOMYG00000008253	ENSOMYG00000008253	protein_coding
diabloa_1	24	complement(17826600..17831121)	10.1136	1.21876	2.32747	0.000924971	0.00985423	1	ENSOMYG00000014397	ENSOMYG00000014397	protein_coding
nt5c2b_2	17	23188337..23217671	3.18534	1.21796	2.32617	0.00776735	0.0486189	1	ENSOMYG00000012141	ENSOMYG00000012141	protein_coding
gene:ENSOMYG00000002810	6	complement(20714080..20726111)	79.4295	1.21794	2.32614	0.00483029	0.0344603	1	ENSOMYG00000002810	ENSOMYG00000002810	protein_coding
gene:ENSOMYG00000011081	16	complement(43580031..43598137)	1.82087	1.21717	2.32489	0.00683287	0.0444617	1	ENSOMYG00000011081	ENSOMYG00000011081	protein_coding
gene:ENSOMYG00000064418	23	complement(47233178..47243370)	11.9165	1.21714	2.32485	0.00140615	0.0135413	1	ENSOMYG00000064418	ENSOMYG00000064418	protein_coding
mepcea_2	Y	31226011..31230546	1.64059	1.21703	2.32467	0.00180542	0.0163502	1	ENSOMYG00000036417	ENSOMYG00000036417	protein_coding
zgc:100846_2	25	complement(23894456..23909124)	7.60037	1.21649	2.3238	0.00365902	0.0279862	1	ENSOMYG00000032892	ENSOMYG00000032892	protein_coding
rgn	7	6834635..6839504	6.55788	1.21627	2.32346	0.000828118	0.00901477	1	ENSOMYG00000008411	ENSOMYG00000008411	protein_coding
MYO18B	5	complement(21290557..21348062)	114.815	1.21383	2.31953	0.00285026	0.023216	1	ENSOMYG00000002970	ENSOMYG00000002970	protein_coding
gene:ENSOMYG00000037620	14	complement(37702100..37711267)	87.4945	1.21374	2.31938	0.00212202	0.0185466	1	ENSOMYG00000037620	ENSOMYG00000037620	protein_coding
gene:ENSOMYG00000013760	4	37874530..37878507	109.582	1.21354	2.31906	0.00623688	0.0414956	1	ENSOMYG00000013760	ENSOMYG00000013760	protein_coding
med30_1	18	36167782..36193318	5.68063	1.21276	2.3178	0.00648207	0.0426697	1	ENSOMYG00000034230	ENSOMYG00000034230	protein_coding
rnd2_1	12	69403258..69435178	10.9425	1.2124	2.31723	0.00473975	0.0339475	1	ENSOMYG00000063912	ENSOMYG00000063912	protein_coding
serpine2_2	27	29829337..29834013	15.6805	1.2106	2.31434	0.000901377	0.00964322	1	ENSOMYG00000041787	ENSOMYG00000041787	protein_coding
nelfa_2	21	complement(42642395..42654605)	4.18386	1.20942	2.31244	0.00150688	0.0143272	1	ENSOMYG00000034781	ENSOMYG00000034781	protein_coding
gene:ENSOMYG00000047209	Y	complement(27589793..27605620)	6.44021	1.20929	2.31224	0.00378608	0.0287079	1	ENSOMYG00000047209	ENSOMYG00000047209	protein_coding
eya3_1	18	65717272..65749432	1.49754	1.20908	2.3119	0.00240978	0.020405	1	ENSOMYG00000038611	ENSOMYG00000038611	protein_coding
gene:ENSOMYG00000003667	13	14289596..14297618	4.42337	1.20858	2.3111	0.00199201	0.0176788	1	ENSOMYG00000003667	ENSOMYG00000003667	protein_coding
ANTXR1_3	11	56386000..56433581	1.73554	1.20784	2.30991	0.0034718	0.026922	1	ENSOMYG00000007706	ENSOMYG00000007706	protein_coding
gene:ENSOMYG00000043739	27	18955789..18989890	3.80432	1.20766	2.30963	0.000500649	0.00608764	1	ENSOMYG00000043739	ENSOMYG00000043739	protein_coding
gene:ENSOMYG00000022532	18	complement(25975550..25976288)	10.8564	1.20701	2.30858	0.00692705	0.0448567	1	ENSOMYG00000022532	ENSOMYG00000022532	protein_coding
kansl2	16	complement(42014391..42043312)	10.8275	1.20698	2.30855	0.00167673	0.0154835	1	ENSOMYG00000029305	ENSOMYG00000029305	protein_coding
wdfy1_1	24	27093529..27129693	3.35119	1.2063	2.30746	0.000569144	0.00672773	1	ENSOMYG00000042987	ENSOMYG00000042987	protein_coding
hexb_2	Y	7907559..7917468	5.25459	1.20598	2.30694	0.00127996	0.0125831	1	ENSOMYG00000037737	ENSOMYG00000037737	protein_coding
gmps_1	24	complement(34419586..34454548)	26.9037	1.20597	2.30693	0.00556939	0.0383063	1	ENSOMYG00000017379	ENSOMYG00000017379	protein_coding
gene:ENSOMYG00000015295	8	28863626..28881458	2.18494	1.20346	2.30291	0.00502038	0.0354579	1	ENSOMYG00000015295	ENSOMYG00000015295	protein_coding
NENF	25	44615763..44629795	8.99691	1.20274	2.30176	0.00432923	0.0317668	1	ENSOMYG00000030739	ENSOMYG00000030739	protein_coding
DMGDH_2	Y	13184278..13228716	2.9697	1.20268	2.30166	0.00712345	0.0458473	1	ENSOMYG00000030429	ENSOMYG00000030429	protein_coding
gene:ENSOMYG00000005320	19	complement(63634533..63647544)	226.946	1.20184	2.30033	0.0053171	0.0369801	1	ENSOMYG00000005320	ENSOMYG00000005320	protein_coding
gene:ENSOMYG00000000497	1	89821744..89843783	10.4	1.20077	2.29862	0.00276729	0.022678	1	ENSOMYG00000000497	ENSOMYG00000000497	protein_coding
gene:ENSOMYG00000067005	7	2055209..2131377	10.4941	1.1993	2.29628	0.0024191	0.0204703	1	ENSOMYG00000067005	ENSOMYG00000067005	protein_coding
nfe2l2a_1	3	complement(50326449..50333018)	19.677	1.19837	2.2948	0.0015181	0.0143909	1	ENSOMYG00000024868	ENSOMYG00000024868	protein_coding
gene:ENSOMYG00000040648	20	complement(26639289..26737619)	1.45376	1.19806	2.2943	0.00422844	0.0311169	1	ENSOMYG00000040648	ENSOMYG00000040648	protein_coding
hoga1_2	17	complement(15744880..15760200)	6.02955	1.19691	2.29248	0.00437145	0.0320121	1	ENSOMYG00000076754	ENSOMYG00000076754	protein_coding
gene:ENSOMYG00000047307	6	complement(34303245..34328393)	5.98855	1.19676	2.29224	0.0013212	0.0128595	1	ENSOMYG00000047307	ENSOMYG00000047307	protein_coding
elp3	4	complement(40751755..40778265)	13.1489	1.19611	2.29121	0.00228252	0.0196012	1	ENSOMYG00000028579	ENSOMYG00000028579	protein_coding
gene:ENSOMYG00000045536	27	30652392..30677473	4.09968	1.19602	2.29107	0.00600037	0.040333	1	ENSOMYG00000045536	ENSOMYG00000045536	protein_coding
gene:ENSOMYG00000048724	17	11309818..11326391	4.92513	1.1959	2.29088	0.000607267	0.00705394	1	ENSOMYG00000048724	ENSOMYG00000048724	protein_coding
dcakd	16	24765653..24780467	9.98889	1.19574	2.29062	0.0032947	0.0258999	1	ENSOMYG00000032721	ENSOMYG00000032721	protein_coding
gene:ENSOMYG00000041544	Y	complement(23670628..23685335)	8.01184	1.19562	2.29044	0.00126983	0.0125077	1	ENSOMYG00000041544	ENSOMYG00000041544	protein_coding
kat2b_1	18	58188195..58210860	3.86233	1.1952	2.28977	0.00249006	0.0209524	1	ENSOMYG00000014314	ENSOMYG00000014314	protein_coding
pbx1a_2	28	complement(18103963..18175657)	17.1284	1.19434	2.2884	0.00286404	0.0232985	1	ENSOMYG00000044723	ENSOMYG00000044723	protein_coding
rnf2	8	90377739..90397401	17.3272	1.19414	2.28809	0.00284508	0.0231887	1	ENSOMYG00000059763	ENSOMYG00000059763	protein_coding
wdr26b_1	4	complement(21796955..21812715)	12.1226	1.19393	2.28775	0.00390441	0.0293999	1	ENSOMYG00000016389	ENSOMYG00000016389	protein_coding
tecpr2_2	25	29342497..29376329	9.92801	1.19333	2.2868	0.00113704	0.0115344	1	ENSOMYG00000016480	ENSOMYG00000016480	protein_coding
pcgf5b_2	20	12817911..12834107	10.0173	1.19329	2.28674	0.000431036	0.00544937	1	ENSOMYG00000017040	ENSOMYG00000017040	protein_coding
gene:ENSOMYG00000032315	12	92537765..92554680	51.2639	1.19226	2.28511	0.00485655	0.0345992	1	ENSOMYG00000032315	ENSOMYG00000032315	protein_coding
gene:ENSOMYG00000017645	22	complement(42736536..42748575)	2.66263	1.1922	2.28501	0.00226053	0.0194583	1	ENSOMYG00000017645	ENSOMYG00000017645	protein_coding
nfkbie_2	8	13517055..13526590	21.7878	1.19078	2.28277	0.00287932	0.0234003	1	ENSOMYG00000039911	ENSOMYG00000039911	protein_coding
armc7	16	18816401..18818637	11.6472	1.18989	2.28135	0.000401535	0.0051977	1	ENSOMYG00000051682	ENSOMYG00000051682	protein_coding
gene:ENSOMYG00000044571	18	39053809..39064436	4.27035	1.18942	2.28061	0.00575511	0.0392311	1	ENSOMYG00000044571	ENSOMYG00000044571	protein_coding
EAF1_1	2	31360479..31363046	6.11867	1.18916	2.2802	0.00187711	0.0168351	1	ENSOMYG00000009388	ENSOMYG00000009388	protein_coding
IRAK1	16	complement(74986623..75015196)	11.3925	1.18901	2.27996	0.00100088	0.0105047	1	ENSOMYG00000077808	ENSOMYG00000077808	protein_coding
gene:ENSOMYG00000036322	6	complement(13011058..13023099)	13.3671	1.18891	2.2798	0.00384694	0.0290426	1	ENSOMYG00000036322	ENSOMYG00000036322	protein_coding
gene:ENSOMYG00000032944	21	46204123..46265613	0.669848	1.18811	2.27855	0.00716086	0.0459964	1	ENSOMYG00000032944	ENSOMYG00000032944	protein_coding
gene:ENSOMYG00000016173	21	complement(20540942..20545854)	2.45996	1.18808	2.27849	0.00300583	0.0241205	1	ENSOMYG00000016173	ENSOMYG00000016173	protein_coding
gene:ENSOMYG00000032157	10	17702995..17735125	4.47521	1.18761	2.27775	0.00230775	0.019783	1	ENSOMYG00000032157	ENSOMYG00000032157	protein_coding
fam13b_2	31	complement(22016389..22060418)	1.75371	1.18731	2.27728	0.00626365	0.0416193	1	ENSOMYG00000016762	ENSOMYG00000016762	protein_coding
tspan3b_2	26	complement(39035989..39042647)	41.3684	1.18599	2.27519	0.0064845	0.0426747	1	ENSOMYG00000026348	ENSOMYG00000026348	protein_coding
gene:ENSOMYG00000026932	11	complement(55191921..55223575)	13.9467	1.18585	2.27497	0.00282914	0.0230958	1	ENSOMYG00000026932	ENSOMYG00000026932	protein_coding
fbxw4_1	1	68338307..68366170	7.61631	1.18563	2.27463	0.00671397	0.0437999	1	ENSOMYG00000003974	ENSOMYG00000003974	protein_coding
cldc1	2	39413837..39419995	7.14734	1.18546	2.27435	0.00202878	0.0179489	1	ENSOMYG00000034835	ENSOMYG00000034835	protein_coding
gene:ENSOMYG00000033347	11	complement(14433230..14455952)	12.9258	1.18517	2.2739	0.00376446	0.0285695	1	ENSOMYG00000033347	ENSOMYG00000033347	protein_coding
pex5_2	3	30668033..30683120	8.50544	1.18509	2.27378	0.00100684	0.0105455	1	ENSOMYG00000000591	ENSOMYG00000000591	protein_coding
cops2_2	30	complement(6862984..6871434)	46.8677	1.18439	2.27267	0.00360607	0.027656	1	ENSOMYG00000026742	ENSOMYG00000026742	protein_coding
pex13	1	complement(88054534..88065807)	8.96441	1.18336	2.27105	0.00122403	0.012203	1	ENSOMYG00000000604	ENSOMYG00000000604	protein_coding
gene:ENSOMYG00000024672	21	24787824..24791733	6.92654	1.18257	2.2698	0.00157297	0.0147844	1	ENSOMYG00000024672	ENSOMYG00000024672	protein_coding
gene:ENSOMYG00000006426	16	complement(21566547..21573666)	35.6049	1.18246	2.26964	0.00281062	0.022974	1	ENSOMYG00000006426	ENSOMYG00000006426	protein_coding
gene:ENSOMYG00000025838	7	59930674..59935276	3.66277	1.18203	2.26895	0.000969655	0.0102531	1	ENSOMYG00000025838	ENSOMYG00000025838	protein_coding
gene:ENSOMYG00000032577	7	complement(57751839..57758397)	6.46609	1.18159	2.26827	0.000975423	0.0102969	1	ENSOMYG00000032577	ENSOMYG00000032577	protein_coding
ccdc82_1	10	46218229..46296608	6.96948	1.18149	2.2681	0.000525127	0.00630995	1	ENSOMYG00000046058	ENSOMYG00000046058	protein_coding
copz2_1	12	complement(67139381..67148238)	31.6683	1.18074	2.26693	0.00116396	0.0117513	1	ENSOMYG00000021226	ENSOMYG00000021226	protein_coding
selenbp1_2	3	4975143..4982991	6.45704	1.1804	2.26639	0.00190838	0.0170436	1	ENSOMYG00000027367	ENSOMYG00000027367	protein_coding
SENP6_1	4	11954808..11973426	17.0903	1.1795	2.26499	0.00170535	0.0156587	1	ENSOMYG00000000105	ENSOMYG00000000105	protein_coding
rnaset2_2	23	39385617..39393792	14.1022	1.17926	2.26461	0.00321625	0.0254087	1	ENSOMYG00000038954	ENSOMYG00000038954	protein_coding
cnppd1_2	18	complement(27987523..27995160)	23.4294	1.17917	2.26446	0.00209563	0.0183869	1	ENSOMYG00000034310	ENSOMYG00000034310	protein_coding
gene:ENSOMYG00000001431	8	complement(8363594..8370323)	61.8853	1.17865	2.26364	0.00612432	0.0409823	1	ENSOMYG00000001431	ENSOMYG00000001431	protein_coding
MAP3K20_1	3	49676815..49731759	1.53845	1.17761	2.26202	0.00337184	0.0263356	1	ENSOMYG00000022111	ENSOMYG00000022111	protein_coding
gene:ENSOMYG00000024743	30	complement(10180658..10185352)	7.49809	1.17697	2.26101	0.00236579	0.0201061	1	ENSOMYG00000024743	ENSOMYG00000024743	protein_coding
gene:ENSOMYG00000017580	12	complement(61544116..61547526)	11.1083	1.17643	2.26017	0.00533502	0.0370541	1	ENSOMYG00000017580	ENSOMYG00000017580	protein_coding
nr3c1_1	14	34184592..34253658	2.7764	1.17629	2.25995	0.00199271	0.0176789	1	ENSOMYG00000022763	ENSOMYG00000022763	protein_coding
zgc:153039	24	complement(26405154..26456606)	2.41029	1.17622	2.25985	0.0037952	0.0287601	1	ENSOMYG00000036201	ENSOMYG00000036201	protein_coding
gene:ENSOMYG00000014321	9	65946465..66045502	1.69743	1.17593	2.25938	0.00396526	0.029721	1	ENSOMYG00000014321	ENSOMYG00000014321	protein_coding
gene:ENSOMYG00000037027	15	57738822..57756091	3.71381	1.17548	2.25868	0.00335995	0.0262829	1	ENSOMYG00000037027	ENSOMYG00000037027	protein_coding
tbk1_2	21	8684932..8741581	3.87292	1.17535	2.25848	0.00513444	0.0360473	1	ENSOMYG00000039039	ENSOMYG00000039039	protein_coding
DPH1	27	22069878..22211972	2.58994	1.17532	2.25843	0.0067674	0.0441033	1	ENSOMYG00000040760	ENSOMYG00000040760	protein_coding
atp6v1d_1	4	complement(35761408..35769590)	29.9882	1.1752	2.25825	0.00190011	0.0169876	1	ENSOMYG00000026277	ENSOMYG00000026277	protein_coding
gene:ENSOMYG00000008805	32	21513359..21514971	10.9133	1.17514	2.25815	0.00617412	0.0412288	1	ENSOMYG00000008805	ENSOMYG00000008805	protein_coding
wdr82_1	7	complement(43493863..43514743)	175.727	1.17514	2.25814	0.00498014	0.0352724	1	ENSOMYG00000012290	ENSOMYG00000012290	protein_coding
dcxr	20	complement(23987138..24000946)	6.58952	1.17436	2.25693	0.00183158	0.016513	1	ENSOMYG00000035622	ENSOMYG00000035622	protein_coding
ldb1b	17	14716444..14765790	6.31022	1.17418	2.25664	0.00334953	0.0262529	1	ENSOMYG00000050962	ENSOMYG00000050962	protein_coding
rab7a	7	complement(49138020..49140653)	42.0612	1.17395	2.25629	0.00333812	0.0261846	1	ENSOMYG00000001397	ENSOMYG00000001397	protein_coding
gmcl1_1	5	complement(36035467..36040313)	9.52119	1.17284	2.25456	0.00120201	0.0120399	1	ENSOMYG00000021462	ENSOMYG00000021462	protein_coding
inpp4ab_1	7	complement(14173269..14207326)	7.42486	1.17204	2.2533	0.00276125	0.0226431	1	ENSOMYG00000011410	ENSOMYG00000011410	protein_coding
daxx_1	18	complement(40112054..40122710)	6.37763	1.17098	2.25164	0.00679074	0.0442327	1	ENSOMYG00000007830	ENSOMYG00000007830	protein_coding
gene:ENSOMYG00000058866	28	complement(19542167..19555965)	12.1879	1.16833	2.24751	0.000554449	0.00658767	1	ENSOMYG00000058866	ENSOMYG00000058866	protein_coding
gene:ENSOMYG00000007143	18	11765649..11772215	15.1237	1.16733	2.24596	0.0030431	0.0243658	1	ENSOMYG00000007143	ENSOMYG00000007143	protein_coding
gene:ENSOMYG00000019446	7	59627627..59651841	2.0337	1.1667	2.24498	0.00674691	0.0440008	1	ENSOMYG00000019446	ENSOMYG00000019446	protein_coding
gene:ENSOMYG00000029981	Y	complement(42579418..42607289)	4.06126	1.16639	2.24449	0.00254532	0.0212977	1	ENSOMYG00000029981	ENSOMYG00000029981	protein_coding
cipca	25	complement(20711911..20714381)	4.87682	1.16625	2.24427	0.00323371	0.0255368	1	ENSOMYG00000020239	ENSOMYG00000020239	protein_coding
minpp1b_2	20	12427593..12434783	4.30039	1.16616	2.24413	0.00380226	0.0288048	1	ENSOMYG00000015566	ENSOMYG00000015566	protein_coding
gene:ENSOMYG00000004318	11	28213476..28225479	2.65842	1.16441	2.24142	0.00266204	0.0220569	1	ENSOMYG00000004318	ENSOMYG00000004318	protein_coding
gtf2b_1	8	complement(52906370..52917316)	10.3025	1.16415	2.24101	0.00159605	0.0149627	1	ENSOMYG00000010047	ENSOMYG00000010047	protein_coding
RABL3	22	14489992..14493447	25.9263	1.16283	2.23895	0.00107907	0.0110966	1	ENSOMYG00000047806	ENSOMYG00000047806	protein_coding
gene:ENSOMYG00000045633	28	complement(19672314..19704793)	41.93	1.16222	2.23802	0.00447865	0.0325715	1	ENSOMYG00000045633	ENSOMYG00000045633	protein_coding
cnppd1_1	7	complement(25363520..25371821)	25.4349	1.16203	2.23772	0.00368211	0.0281206	1	ENSOMYG00000008360	ENSOMYG00000008360	protein_coding
gene:ENSOMYG00000020308	18	complement(20050959..20140622)	1.51074	1.16071	2.23567	0.00585902	0.0396867	1	ENSOMYG00000020308	ENSOMYG00000020308	protein_coding
znf687a_1	2	15788357..15800309	4.31799	1.16003	2.23462	0.00402429	0.0300665	1	ENSOMYG00000002126	ENSOMYG00000002126	protein_coding
gene:ENSOMYG00000041077	27	complement(33004270..33050908)	7.91764	1.16002	2.2346	0.00394955	0.0296446	1	ENSOMYG00000041077	ENSOMYG00000041077	protein_coding
FAM114A2	12	35408337..35418372	26.5423	1.15911	2.2332	0.00348031	0.0269595	1	ENSOMYG00000027933	ENSOMYG00000027933	protein_coding
meox2b_2	32	23108500..23119648	113.118	1.15896	2.23297	0.00574344	0.0391643	1	ENSOMYG00000027997	ENSOMYG00000027997	protein_coding
aggf1_1	5	complement(23352060..23360312)	4.91861	1.157	2.22993	0.00153133	0.0144893	1	ENSOMYG00000003353	ENSOMYG00000003353	protein_coding
GABPB2_2	3	23369985..23374436	2.34361	1.1566	2.22932	0.00409685	0.0304903	1	ENSOMYG00000009761	ENSOMYG00000009761	protein_coding
gene:ENSOMYG00000074430	16	68397049..68405205	75.9465	1.15613	2.22858	0.0055938	0.0384633	1	ENSOMYG00000074430	ENSOMYG00000074430	protein_coding
manba	19	65108935..65142837	1.33181	1.15602	2.22842	0.0036833	0.0281212	1	ENSOMYG00000006442	ENSOMYG00000006442	protein_coding
ube2d1a_1	1	76935729..76938844	10.9856	1.15561	2.22779	0.00215079	0.018729	1	ENSOMYG00000045640	ENSOMYG00000045640	protein_coding
GIT2_2	6	complement(18057286..18074659)	2.73871	1.15521	2.22716	0.00614752	0.0410943	1	ENSOMYG00000007557	ENSOMYG00000007557	protein_coding
gene:ENSOMYG00000073242	17	complement(16939130..16968370)	2.56787	1.15496	2.22678	0.00495434	0.0351601	1	ENSOMYG00000073242	ENSOMYG00000073242	protein_coding
ZBTB21_1	10	complement(32489335..32496694)	3.15522	1.15239	2.22282	0.00180328	0.0163457	1	ENSOMYG00000022190	ENSOMYG00000022190	protein_coding
fundc1_1	3	complement(74678945..74680729)	26.6296	1.15168	2.22173	0.00176413	0.0160552	1	ENSOMYG00000026947	ENSOMYG00000026947	protein_coding
mios_1	2	34423680..34431484	4.19797	1.15115	2.22091	0.00242932	0.0205192	1	ENSOMYG00000005543	ENSOMYG00000005543	protein_coding
MFN1_1	1	complement(10055177..10079374)	16.1195	1.15115	2.22091	0.00255824	0.0213848	1	ENSOMYG00000002960	ENSOMYG00000002960	protein_coding
gene:ENSOMYG00000022072	16	9124368..9130930	11.759	1.15082	2.22039	0.001031	0.0107455	1	ENSOMYG00000022072	ENSOMYG00000022072	protein_coding
cox18	31	33583221..33593020	4.25975	1.15066	2.22015	0.00420217	0.0309773	1	ENSOMYG00000022719	ENSOMYG00000022719	protein_coding
stom_3	Y	24513495..24593947	31.4887	1.14989	2.21898	0.00744968	0.0472202	1	ENSOMYG00000055625	ENSOMYG00000055625	protein_coding
elof1_2	13	44049386..44052893	3.77955	1.14965	2.2186	0.00737162	0.0469475	1	ENSOMYG00000018586	ENSOMYG00000018586	protein_coding
gene:ENSOMYG00000017054	12	complement(60998015..61024273)	4.07278	1.14955	2.21844	0.00179273	0.0162791	1	ENSOMYG00000017054	ENSOMYG00000017054	protein_coding
INPP5K_2	27	10436373..10451644	0.88033	1.14954	2.21842	0.00519204	0.0363786	1	ENSOMYG00000045604	ENSOMYG00000045604	protein_coding
gene:ENSOMYG00000012493	10	complement(44878599..44946170)	16.4769	1.14886	2.21739	0.00242242	0.0204902	1	ENSOMYG00000012493	ENSOMYG00000012493	protein_coding
trappc12	25	13764183..13780982	7.37465	1.14812	2.21625	0.00172448	0.0157889	1	ENSOMYG00000031451	ENSOMYG00000031451	protein_coding
ptcd2_2	Y	complement(9166240..9170353)	10.9362	1.14806	2.21615	0.00145915	0.0139585	1	ENSOMYG00000041347	ENSOMYG00000041347	protein_coding
gene:ENSOMYG00000013804	3	66208895..66266515	8.70599	1.14776	2.21569	0.00272759	0.0224553	1	ENSOMYG00000013804	ENSOMYG00000013804	protein_coding
tmem230a	5	complement(34413411..34421865)	6.0973	1.14719	2.21482	0.00368768	0.0281378	1	ENSOMYG00000035009	ENSOMYG00000035009	protein_coding
RNF111_1	6	complement(67904568..67941529)	6.87753	1.14645	2.21368	0.000904604	0.00967211	1	ENSOMYG00000010301	ENSOMYG00000010301	protein_coding
gene:ENSOMYG00000048054	10	83560331..83562582	8.04305	1.14593	2.21289	0.00743924	0.0471658	1	ENSOMYG00000048054	ENSOMYG00000048054	protein_coding
mcl1b_2	3	complement(23746836..23770876)	67.6469	1.14566	2.21247	0.00415207	0.0307326	1	ENSOMYG00000011666	ENSOMYG00000011666	protein_coding
gene:ENSOMYG00000066223	17	4492015..4519625	32.1593	1.14557	2.21234	0.00539102	0.0373691	1	ENSOMYG00000066223	ENSOMYG00000066223	protein_coding
stat1-2	7	complement(22638334..22657391)	6.1693	1.14548	2.2122	0.00126231	0.0124626	1	ENSOMYG00000029899	ENSOMYG00000029899	protein_coding
mrrf_2	12	13496656..13511638	25.4295	1.14544	2.21214	0.00367549	0.0280784	1	ENSOMYG00000018946	ENSOMYG00000018946	protein_coding
[truncated: 2,052 more rows]

## Sheet: sup5
Table S5: Summary of the WGBS data
Sample	Raw reads	Avg.length	Trimmed sequences	avg lentgh after trim	Mapping rate	BS conversion rate (%)
LD 1	75907796	151	75773017	124.7	73.2	99.01
LD 2	73621141	151	73486362	121.4	74.1	98.99
LD 3	77201582	151	77066803	121.3	74.2	99.02
HD 1	78949486	151	78814707	122.3	75.7	98.78
HD 2	75671342	151	75536563	122.7	76.3	98.91
HD 3	74534564	151	74399785	114.8	73.1	99.3
Total	455885911	151	455077237	121.2	74.4333	99.0017

## Sheet: sup6
Table S6: Relative level of methylated cytosines (CG, CHG, CHH) in LD and HD groups
Sample	mCG (%)	mCHG (%)	mCHH (%)
LD 1	85.3	7.6	7.2
LD 2	84.9	8.1	7.2
LD 3	86.7	7.2	6.9
HD 1	86.2	7.1	7.1
HD 2	83.2	7.9	7
HD 3	85.7	7.8	6.9
Total	85.3333	7.61667	7.05

## Sheet: sup7
										Table S7: Complete list of differentially hyper -methylated regions in LD vs. HD group
Chromosome	Region	Name	Cytosines	Case samples	Case coverage	Case coverage mean	Case methylated	Case methylation level	Control samples	Control coverage	Control coverage mean	Control methylated	Control methylation level	p-value	5' annotation	5' distance	3' annotation	3' distance	Gene Name
1	37001..37200		4	1	12	3	12	1	1	9	2.25	4	0.444444	0.00619195			gene:ENSOMYG00000025658	0	transcript:ENSOMYT00000060763
1	226201..226400		14	1	26	1.85714	15	0.576923	1	30	2.14286	4	0.133333	0.000552701	gene:ENSOMYG00000025658	53194	gene:ENSOMYG00000015304	11516
1	232001..232200		14	1	32	2.28571	27	0.84375	1	14	1	6	0.428571	0.00670038	gene:ENSOMYG00000025658	58994	gene:ENSOMYG00000015304	5716
1	264001..264200		8	1	15	1.875	15	1	1	23	2.875	12	0.521739	0.00112362	gene:ENSOMYG00000015304	20735	gene:ENSOMYG00000015291	0	transcript:ENSOMYT00000035604
1	264401..264600		15	1	38	2.53333	34	0.894737	1	11	0.733333	5	0.454545	0.00450296	gene:ENSOMYG00000015304	21135	gene:ENSOMYG00000015291	0	transcript:ENSOMYT00000035604
1	305001..305200		12	1	92	7.66667	60	0.652174	1	80	6.66667	35	0.4375	0.00371997	gene:ENSOMYG00000015291	15535	gene:ENSOMYG00000073216	38533
1	422401..422600		10	1	15	1.5	13	0.866667	1	8	0.8	1	0.125	0.00104627	gene:ENSOMYG00000015207	2565	gene:ENSOMYG00000053917	32555
1	439801..440000		16	1	33	2.0625	17	0.515152	1	42	2.625	9	0.214286	0.00660628	gene:ENSOMYG00000015207	19965	gene:ENSOMYG00000053917	15155
1	440601..440800		24	1	27	1.125	9	0.333333	1	53	2.20833	4	0.0754717	0.00504212	gene:ENSOMYG00000015207	20765	gene:ENSOMYG00000053917	14355
1	519801..520000		16	1	6	0.375	6	1	1	15	0.9375	3	0.2	0.00154799	gene:ENSOMYG00000053917	24532	gene:ENSOMYG00000046473	46390
1	554801..555000		14	1	81	5.78571	79	0.975309	1	91	6.5	71	0.78022	6.92874e-05	gene:ENSOMYG00000053917	59532	gene:ENSOMYG00000046473	11390
1	564001..564200		14	1	59	4.21429	52	0.881356	1	118	8.42857	81	0.686441	0.00307203	gene:ENSOMYG00000053917	68732	gene:ENSOMYG00000046473	2190
1	585601..585800		14	1	46	3.28571	43	0.934783	1	72	5.14286	54	0.75	0.00803557	gene:ENSOMYG00000046473	17925	gene:ENSOMYG00000000197	16961
1	1087201..1087400		7	1	17	2.42857	16	0.941176	1	5	0.714286	1	0.2	0.00326574	CHST7	46836	tubgcp5	2421
1	1100801..1101000		18	1	48	2.66667	37	0.770833	1	50	2.77778	22	0.44	0.000761507	tubgcp5	0	gene:ENSOMYG00000048481	4307	tubgcp5-201
1	1270601..1270800		16	1	14	0.875	14	1	1	28	1.75	18	0.642857	0.00891853	cyfip1	0	nipa2	30483	cyfip1-204, cyfip1-203, cyfip1-202, cyfip1-201
1	1299801..1300000		14	1	23	1.64286	23	1	1	14	1	9	0.642857	0.00459283	cyfip1	0	nipa2	1283	cyfip1-204, cyfip1-203, cyfip1-202, cyfip1-201
1	1324201..1324400		13	1	15	1.15385	15	1	1	12	0.923077	7	0.583333	0.00981048	nipa1	7384	GABRB3	10399
1	1359601..1359800		14	1	17	1.21429	16	0.941176	1	25	1.78571	12	0.48	0.00175676	GABRB3	0	gene:ENSOMYG00000001424	102118	GABRB3-201
1	1458601..1458800		23	1	56	2.43478	48	0.857143	1	37	1.6087	21	0.567568	0.00207671	GABRB3	63441	gene:ENSOMYG00000001424	3118
1	1577201..1577400		14	1	25	1.78571	24	0.96	1	2	0.142857	0	0	0.00854701	gene:ENSOMYG00000001424	0	ube3a	160668	transcript:ENSOMYT00000153110
1	1587601..1587800		19	1	32	1.68421	29	0.90625	1	53	2.78947	27	0.509434	0.000119186	gene:ENSOMYG00000001424	0	ube3a	150268	transcript:ENSOMYT00000153110
1	1859401..1859600		17	1	64	3.76471	14	0.21875	1	36	2.11765	1	0.0277778	0.00743008	gene:ENSOMYG00000000403	47146	gene:ENSOMYG00000067656	0	transcript:ENSOMYT00000147395
1	1865001..1865200		10	1	24	2.4	17	0.708333	1	18	1.8	4	0.222222	0.00218409	gene:ENSOMYG00000067656	0	si:ch211-201h21.5	104859	transcript:ENSOMYT00000147395
1	1980201..1980400		12	1	30	2.5	28	0.933333	1	29	2.41667	19	0.655172	0.00875657	gene:ENSOMYG00000001467	1595	zgc:172121	0	zgc:172121-201
1	1985001..1985200		12	1	17	1.41667	7	0.411765	1	15	1.25	0	0	0.00577802	zgc:172121	850	nme7	197
1	2156601..2156800		10	1	17	1.7	12	0.705882	1	34	3.4	8	0.235294	0.00162645	atp1b1a	25947	dpt	19792
1	2179001..2179200		21	1	14	0.666667	13	0.928571	1	22	1.04762	9	0.409091	0.00191862	dpt	0	gene:ENSOMYG00000000412	33149	dpt-201, dpt-202
1	2275401..2275600		7	1	5	0.714286	5	1	1	4	0.571429	0	0	0.00793651	gene:ENSOMYG00000000583	40191	gene:ENSOMYG00000000561	0	transcript:ENSOMYT00000001095, transcript:ENSOMYT00000001092
1	2464801..2465000		12	1	29	2.41667	28	0.965517	1	24	2	15	0.625	0.00204516	gene:ENSOMYG00000000561	104625	gene:ENSOMYG00000001189	112535
1	2530001..2530200		10	1	15	1.5	15	1	1	11	1.1	6	0.545455	0.00702341	gene:ENSOMYG00000000561	169825	gene:ENSOMYG00000001189	47335
1	2531001..2531200		13	1	20	1.53846	18	0.9	1	16	1.23077	7	0.4375	0.00389166	gene:ENSOMYG00000000561	170825	gene:ENSOMYG00000001189	46335
1	2572801..2573000		5	1	7	1.4	7	1	1	8	1.6	1	0.125	0.0012432	gene:ENSOMYG00000000561	212625	gene:ENSOMYG00000001189	4535
1	2599001..2599200		17	1	29	1.70588	26	0.896552	1	14	0.823529	4	0.285714	0.000104112	gene:ENSOMYG00000001189	19783	gene:ENSOMYG00000077295	15356
1	2705801..2706000		13	1	32	2.46154	31	0.96875	1	20	1.53846	13	0.65	0.00346376	gene:ENSOMYG00000001186	87532	gene:ENSOMYG00000000350	0	transcript:ENSOMYT00000000599, transcript:ENSOMYT00000000597
1	2770201..2770400		18	1	74	4.11111	71	0.959459	1	35	1.94444	27	0.771429	0.00450968	gene:ENSOMYG00000001186	151932	gene:ENSOMYG00000000350	0	transcript:ENSOMYT00000000599, transcript:ENSOMYT00000000597
1	2929401..2929600		12	1	35	2.91667	32	0.914286	1	19	1.58333	7	0.368421	4.00197e-05	gene:ENSOMYG00000003292	149843	gene:ENSOMYG00000064702	50084
1	2962801..2963000		8	1	10	1.25	10	1	1	15	1.875	7	0.466667	0.00594966	gene:ENSOMYG00000003292	183243	gene:ENSOMYG00000064702	16684
1	2999601..2999800		22	1	26	1.18182	23	0.884615	1	3	0.136364	0	0	0.00547345	gene:ENSOMYG00000064702	17587	lpp	22917
1	3118801..3119000		8	1	22	2.75	22	1	1	8	1	4	0.5	0.00255428	gene:ENSOMYG00000064702	136787	lpp	0	lpp-206, lpp-204, lpp-201, lpp-205, lpp-202, lpp-203
1	3539801..3540000		16	1	31	1.9375	12	0.387097	1	31	1.9375	2	0.0645161	0.00248565	gene:ENSOMYG00000071902	151751	bcl6aa	19560
1	3601601..3601800		12	1	5	0.416667	4	0.8	1	8	0.666667	0	0	0.00699301	bcl6aa	0	gene:ENSOMYG00000060440	7744	bcl6aa-201, bcl6aa-202
1	3605601..3605800		22	1	48	2.18182	23	0.479167	1	53	2.40909	8	0.150943	0.000346986	bcl6aa	0	gene:ENSOMYG00000060440	3744	bcl6aa-201, bcl6aa-202, bcl6aa-203, bcl6aa-204
1	3640801..3641000		19	1	42	2.21053	12	0.285714	1	54	2.84211	4	0.0740741	0.00635898	gene:ENSOMYG00000060440	27014	smx5	0	smx5-201
1	3697601..3697800		8	1	152	19	148	0.973684	1	227	28.375	204	0.898678	0.00342224	smx5	56239	gene:ENSOMYG00000001620	0	transcript:ENSOMYT00000003475, transcript:ENSOMYT00000003443, transcript:ENSOMYT00000128291, transcript:ENSOMYT00000147010, transcript:ENSOMYT00000148861, transcript:ENSOMYT00000159825, transcript:ENSOMYT00000003450, transcript:ENSOMYT00000137867
1	3999001..3999200		16	1	58	3.625	55	0.948276	1	39	2.4375	28	0.717949	0.00209781	cep63	153159	rab6ba	0	rab6ba-202, rab6ba-203
1	4011001..4011200		12	1	26	2.16667	19	0.730769	1	37	3.08333	10	0.27027	0.000342948	cep63	165159	rab6ba	0	rab6ba-202, rab6ba-203
1	4047601..4047800		11	1	31	2.81818	27	0.870968	1	16	1.45455	5	0.3125	0.000194094	rab6ba	9789	gene:ENSOMYG00000059469	0	transcript:ENSOMYT00000121170
1	4231401..4231600		3	1	11	3.66667	9	0.818182	1	7	2.33333	1	0.142857	0.00904977	gene:ENSOMYG00000021650	105440	ryk	0	ryk-203, ryk-202, ryk-201, ryk-209, ryk-208
1	4268601..4268800		18	1	19	1.05556	9	0.473684	1	16	0.888889	0	0	0.00130833	ryk	11464	gene:ENSOMYG00000070354	0	transcript:ENSOMYT00000153207
1	4280201..4280400		18	1	55	3.05556	47	0.854545	1	27	1.5	13	0.481481	0.000557962	ryk	23064	gene:ENSOMYG00000070354	0	transcript:ENSOMYT00000153207
1	4302201..4302400		10	1	15	1.5	14	0.933333	1	12	1.2	3	0.25	0.000398991	ryk	45064	gene:ENSOMYG00000070354	0	transcript:ENSOMYT00000153207
1	4344601..4344800		18	1	30	1.66667	24	0.8	1	46	2.55556	9	0.195652	1.92776e-07	ryk	87464	gene:ENSOMYG00000070354	0	transcript:ENSOMYT00000153207
1	4362001..4362200		12	1	11	0.916667	11	1	1	3	0.25	0	0	0.00274725	ryk	104864	gene:ENSOMYG00000070354	0	transcript:ENSOMYT00000153207
1	4414401..4414600		13	1	27	2.07692	17	0.62963	1	20	1.53846	2	0.1	0.000243626	ryk	157264	gene:ENSOMYG00000070354	0	transcript:ENSOMYT00000153207
1	4616001..4616200		13	1	15	1.15385	6	0.4	1	33	2.53846	1	0.030303	0.0023306	gene:ENSOMYG00000070354	201295	gene:ENSOMYG00000055058	0	transcript:ENSOMYT00000136959
1	4746401..4746600		21	1	39	1.85714	37	0.948718	1	52	2.47619	37	0.711538	0.00326065	gene:ENSOMYG00000007614	42653	gene:ENSOMYG00000067220	13099
1	4770401..4770600		5	1	10	2	8	0.8	1	6	1.2	0	0	0.0034965	gene:ENSOMYG00000007614	66653	gene:ENSOMYG00000067220	0	transcript:ENSOMYT00000150693, transcript:ENSOMYT00000150486, transcript:ENSOMYT00000143017, transcript:ENSOMYT00000126641, transcript:ENSOMYT00000024873, transcript:ENSOMYT00000031302, transcript:ENSOMYT00000137493, transcript:ENSOMYT00000145307, transcript:ENSOMYT00000031005, transcript:ENSOMYT00000136820
1	4771001..4771200		13	1	29	2.23077	24	0.827586	1	29	2.23077	13	0.448276	0.0028201	gene:ENSOMYG00000007614	67253	gene:ENSOMYG00000067220	0	transcript:ENSOMYT00000150693, transcript:ENSOMYT00000150486, transcript:ENSOMYT00000143017, transcript:ENSOMYT00000126641, transcript:ENSOMYT00000024873, transcript:ENSOMYT00000031302, transcript:ENSOMYT00000137493, transcript:ENSOMYT00000145307, transcript:ENSOMYT00000031005, transcript:ENSOMYT00000136820
1	4780601..4780800		11	1	25	2.27273	14	0.56	1	21	1.90909	3	0.142857	0.00380567	gene:ENSOMYG00000007614	76853	gene:ENSOMYG00000067220	0	transcript:ENSOMYT00000150693, transcript:ENSOMYT00000150486, transcript:ENSOMYT00000143017, transcript:ENSOMYT00000126641, transcript:ENSOMYT00000024873, transcript:ENSOMYT00000031302, transcript:ENSOMYT00000137493, transcript:ENSOMYT00000145307, transcript:ENSOMYT00000031005, transcript:ENSOMYT00000136820
1	4793201..4793400		14	1	26	1.85714	21	0.807692	1	6	0.428571	1	0.166667	0.00634965	gene:ENSOMYG00000007614	89453	gene:ENSOMYG00000067220	0	transcript:ENSOMYT00000150693, transcript:ENSOMYT00000150486, transcript:ENSOMYT00000143017, transcript:ENSOMYT00000126641, transcript:ENSOMYT00000024873, transcript:ENSOMYT00000031302, transcript:ENSOMYT00000137493, transcript:ENSOMYT00000145307, transcript:ENSOMYT00000031005, transcript:ENSOMYT00000136820
1	4861401..4861600		19	1	54	2.84211	46	0.851852	1	18	0.947368	9	0.5	0.00436742	gene:ENSOMYG00000007614	157653	gene:ENSOMYG00000067220	0	transcript:ENSOMYT00000150693, transcript:ENSOMYT00000150486, transcript:ENSOMYT00000143017, transcript:ENSOMYT00000126641, transcript:ENSOMYT00000024873, transcript:ENSOMYT00000031302, transcript:ENSOMYT00000137493, transcript:ENSOMYT00000145307, transcript:ENSOMYT00000031005, transcript:ENSOMYT00000136820
1	4904801..4905000		21	1	39	1.85714	37	0.948718	1	21	1	11	0.52381	0.000196813	gene:ENSOMYG00000007614	201053	gene:ENSOMYG00000067220	0	transcript:ENSOMYT00000150693, transcript:ENSOMYT00000150486, transcript:ENSOMYT00000143017, transcript:ENSOMYT00000126641, transcript:ENSOMYT00000024873, transcript:ENSOMYT00000031302, transcript:ENSOMYT00000137493, transcript:ENSOMYT00000145307, transcript:ENSOMYT00000031005, transcript:ENSOMYT00000136820
1	4928001..4928200		14	1	13	0.928571	11	0.846154	1	6	0.428571	1	0.166667	0.00954592	gene:ENSOMYG00000067220	6643	agxta	20294
1	4992001..4992200		19	1	23	1.21053	15	0.652174	1	39	2.05263	5	0.128205	3.29566e-05	gene:ENSOMYG00000001120	4141	boka	4499
1	5010601..5010800		12	1	27	2.25	14	0.518519	1	30	2.5	5	0.166667	0.00532443	gene:ENSOMYG00000001120	22741	boka	0	boka-201
1	5026601..5026800		12	1	25	2.08333	21	0.84	1	20	1.66667	8	0.4	0.00275868	gene:ENSOMYG00000001120	38741	boka	0	boka-201
1	5046001..5046200		4	1	19	4.75	11	0.578947	1	15	3.75	2	0.133333	0.00939571	boka	1819	gene:ENSOMYG00000060365	485063
1	5087001..5087200		10	1	15	1.5	13	0.866667	1	20	2	5	0.25	0.000375032	boka	42819	gene:ENSOMYG00000060365	444063
1	5373201..5373400		16	1	33	2.0625	33	1	1	43	2.6875	33	0.767442	0.00200868	boka	329019	gene:ENSOMYG00000060365	157863
1	5402001..5402200		8	1	20	2.5	20	1	1	8	1	4	0.5	0.0034188	boka	357819	gene:ENSOMYG00000060365	129063
1	5612001..5612200		8	1	12	1.5	12	1	1	6	0.75	0	0	5.38677e-05	gene:ENSOMYG00000060365	77330	gene:ENSOMYG00000001261	52633
1	5631401..5631600		10	1	20	2	18	0.9	1	7	0.7	2	0.285714	0.00465187	gene:ENSOMYG00000060365	96730	gene:ENSOMYG00000001261	33233
1	5640401..5640600		12	1	23	1.91667	9	0.391304	1	20	1.66667	1	0.05	0.00912092	gene:ENSOMYG00000060365	105730	gene:ENSOMYG00000001261	24233
1	5678801..5679000		14	1	15	1.07143	15	1	1	18	1.28571	9	0.5	0.00126066	gene:ENSOMYG00000001261	0	gene:ENSOMYG00000001546	859097	transcript:ENSOMYT00000002645, transcript:ENSOMYT00000128257
1	5699801..5700000		16	1	50	3.125	40	0.8	1	15	0.9375	6	0.4	0.00484651	gene:ENSOMYG00000001261	0	gene:ENSOMYG00000001546	838097	transcript:ENSOMYT00000002645, transcript:ENSOMYT00000128257
1	5732001..5732200		38	1	44	1.15789	43	0.977273	1	7	0.184211	1	0.142857	2.66897e-06	gene:ENSOMYG00000001261	0	gene:ENSOMYG00000001546	805897	transcript:ENSOMYT00000002645, transcript:ENSOMYT00000128257, transcript:ENSOMYT00000158104, transcript:ENSOMYT00000148282, transcript:ENSOMYT00000060834, transcript:ENSOMYT00000125866, transcript:ENSOMYT00000164226
1	5799201..5799400		11	1	13	1.18182	12	0.923077	1	4	0.363636	0	0	0.00210084	gene:ENSOMYG00000001261	33366	gene:ENSOMYG00000001546	738697
1	5838801..5839000		24	1	18	0.75	15	0.833333	1	49	2.04167	22	0.44898	0.00471062	gene:ENSOMYG00000001261	72966	gene:ENSOMYG00000001546	699097
1	5975801..5976000		16	1	47	2.9375	43	0.914894	1	54	3.375	38	0.703704	0.0069441	gene:ENSOMYG00000001261	209966	gene:ENSOMYG00000001546	562097
1	6073601..6073800		7	1	15	2.14286	14	0.933333	1	9	1.28571	2	0.222222	0.00074646	gene:ENSOMYG00000001261	307766	gene:ENSOMYG00000001546	464297
1	6159401..6159600		6	1	6	1	6	1	1	5	0.833333	0	0	0.0021645	gene:ENSOMYG00000001261	393566	gene:ENSOMYG00000001546	378497
1	6182601..6182800		12	1	22	1.83333	16	0.727273	1	12	1	2	0.166667	0.00238107	gene:ENSOMYG00000001261	416766	gene:ENSOMYG00000001546	355297
1	6211801..6212000		12	1	107	8.91667	96	0.897196	1	38	3.16667	20	0.526316	4.39e-06	gene:ENSOMYG00000001261	445966	gene:ENSOMYG00000001546	326097
1	6242001..6242200		4	1	8	2	7	0.875	1	7	1.75	1	0.142857	0.00885781	gene:ENSOMYG00000001261	476166	gene:ENSOMYG00000001546	295897
1	6248201..6248400		32	1	84	2.625	78	0.928571	1	64	2	46	0.71875	0.000648969	gene:ENSOMYG00000001261	482366	gene:ENSOMYG00000001546	289697
1	6334601..6334800		20	1	31	1.55	28	0.903226	1	18	0.9	10	0.555556	0.00757446	gene:ENSOMYG00000001261	568766	gene:ENSOMYG00000001546	203297
1	6352801..6353000		12	1	24	2	22	0.916667	1	11	0.916667	5	0.454545	0.0057613	gene:ENSOMYG00000001261	586966	gene:ENSOMYG00000001546	185097
1	6473201..6473400		11	1	14	1.27273	13	0.928571	1	16	1.45455	6	0.375	0.00213227	gene:ENSOMYG00000001261	707366	gene:ENSOMYG00000001546	64697
1	6478601..6478800		15	1	31	2.06667	26	0.83871	1	27	1.8	12	0.444444	0.0018428	gene:ENSOMYG00000001261	712766	gene:ENSOMYG00000001546	59297
1	6492001..6492200		10	1	35	3.5	31	0.885714	1	20	2	9	0.45	0.000812319	gene:ENSOMYG00000001261	726166	gene:ENSOMYG00000001546	45897
1	6556401..6556600		7	1	4	0.571429	4	1	1	8	1.14286	0	0	0.0020202	polr2h	722	gene:ENSOMYG00000001600	3453
1	6679201..6679400		8	1	17	2.125	15	0.882353	1	18	2.25	8	0.444444	0.00780232	gene:ENSOMYG00000001600	20234	b3gnt7	4963
1	6751001..6751200		22	1	24	1.09091	9	0.375	1	25	1.13636	0	0	0.000636424	ncl	964	nppc	21221
1	6761801..6762000		17	1	38	2.23529	37	0.973684	1	28	1.64706	20	0.714286	0.00337749	ncl	11764	nppc	10421
1	6807401..6807600		12	1	29	2.41667	29	1	1	39	3.25	27	0.692308	0.000537048	nppc	27513	gene:ENSOMYG00000001873	221033
1	6877201..6877400		12	1	24	2	21	0.875	1	7	0.583333	2	0.285714	0.00563589	nppc	97313	gene:ENSOMYG00000001873	151233
1	6912001..6912200		19	1	26	1.36842	22	0.846154	1	12	0.631579	4	0.333333	0.00295257	nppc	132113	gene:ENSOMYG00000001873	116433
1	6920001..6920200		17	1	17	1	17	1	1	27	1.58824	14	0.518519	0.000386364	nppc	140113	gene:ENSOMYG00000001873	108433
1	6958401..6958600		10	1	20	2	15	0.75	1	12	1.2	2	0.166667	0.00191356	nppc	178513	gene:ENSOMYG00000001873	70033
1	6958801..6959000		5	1	9	1.8	9	1	1	11	2.2	4	0.363636	0.00425697	nppc	178913	gene:ENSOMYG00000001873	69633
1	7042401..7042600		18	1	29	1.61111	23	0.793103	1	41	2.27778	15	0.365854	0.000399422	gene:ENSOMYG00000001873	0	gene:ENSOMYG00000076214	13569	transcript:ENSOMYT00000003929
1	7083001..7083200		16	1	21	1.3125	17	0.809524	1	39	2.4375	11	0.282051	0.000105308	alpi.2	0	gene:ENSOMYG00000001999	13352	alpi.2-201, alpi.2-202, alpi.2-203
1	7148001..7148200		12	1	40	3.33333	38	0.95	1	21	1.75	12	0.571429	0.000582947	gene:ENSOMYG00000001999	41685	nr5a2	225664
1	7155201..7155400		14	1	24	1.71429	23	0.958333	1	31	2.21429	15	0.483871	0.000109573	gene:ENSOMYG00000001999	48885	nr5a2	218464
1	7203801..7204000		12	1	23	1.91667	17	0.73913	1	12	1	1	0.0833333	0.000274379	gene:ENSOMYG00000001999	97485	nr5a2	169864
1	7254001..7254200		4	1	6	1.5	6	1	1	4	1	0	0	0.0047619	gene:ENSOMYG00000001999	147685	nr5a2	119664
1	7635401..7635600		10	1	14	1.4	12	0.857143	1	4	0.4	0	0	0.00490196	gene:ENSOMYG00000057577	114744	gene:ENSOMYG00000002307	93979
1	7728401..7728600		14	1	32	2.28571	25	0.78125	1	18	1.28571	5	0.277778	0.000674349	gene:ENSOMYG00000057577	207744	gene:ENSOMYG00000002307	979
1	7728801..7729000		17	1	20	1.17647	14	0.7	1	25	1.47059	5	0.2	0.000929696	gene:ENSOMYG00000057577	208144	gene:ENSOMYG00000002307	579
1	7780201..7780400		39	1	43	1.10256	41	0.953488	1	69	1.76923	51	0.73913	0.00270727	camsap2a	0	gene:ENSOMYG00000002408	60166	camsap2a-201
1	7793801..7794000		26	1	52	2	49	0.942308	1	33	1.26923	24	0.727273	0.00749038	camsap2a	0	gene:ENSOMYG00000002408	46566	camsap2a-201
1	7805201..7805400		4	1	10	2.5	10	1	1	20	5	9	0.45	0.00307465	camsap2a	0	gene:ENSOMYG00000002408	35166	camsap2a-201
1	7864801..7865000		15	1	20	1.33333	10	0.5	1	24	1.6	2	0.0833333	0.00261488	gene:ENSOMYG00000002408	0	gene:ENSOMYG00000066003	20624	transcript:ENSOMYT00000120849, transcript:ENSOMYT00000005161, transcript:ENSOMYT00000163239, transcript:ENSOMYT00000161767, transcript:ENSOMYT00000005148, transcript:ENSOMYT00000130726, transcript:ENSOMYT00000148377
1	7879601..7879800		26	1	28	1.07692	27	0.964286	1	20	0.769231	13	0.65	0.00608596	gene:ENSOMYG00000002408	0	gene:ENSOMYG00000066003	5824	transcript:ENSOMYT00000120849, transcript:ENSOMYT00000005161, transcript:ENSOMYT00000163239, transcript:ENSOMYT00000161767, transcript:ENSOMYT00000005148, transcript:ENSOMYT00000130726, transcript:ENSOMYT00000148377
1	7946401..7946600		10	1	31	3.1	27	0.870968	1	9	0.9	2	0.222222	0.000507682	gene:ENSOMYG00000002444	12016	gene:ENSOMYG00000065883	115066
1	8062201..8062400		14	1	14	1	6	0.428571	1	22	1.57143	0	0	0.00154175	gene:ENSOMYG00000065883	0	dynlt2b	78234	transcript:ENSOMYT00000157452
1	8087201..8087400		4	1	6	1.5	6	1	1	4	1	0	0	0.0047619	gene:ENSOMYG00000065883	0	dynlt2b	53234	transcript:ENSOMYT00000157452
1	8090001..8090200		6	1	18	3	17	0.944444	1	4	0.666667	1	0.25	0.00997949	gene:ENSOMYG00000065883	2094	dynlt2b	50434
1	8097201..8097400		7	1	27	3.85714	23	0.851852	1	27	3.85714	14	0.518519	0.00884679	gene:ENSOMYG00000065883	9294	dynlt2b	43234
1	8125801..8126000		10	1	33	3.3	30	0.909091	1	7	0.7	2	0.285714	0.00153833	gene:ENSOMYG00000065883	37894	dynlt2b	14634
1	8176201..8176400		6	1	13	2.16667	13	1	1	9	1.5	3	0.333333	0.00112581	dynlt2b	28256	gene:ENSOMYG00000000143	5947
1	8178601..8178800		20	1	40	2	33	0.825	1	24	1.2	12	0.5	0.00704297	dynlt2b	30656	gene:ENSOMYG00000000143	3547
1	8212001..8212200		14	1	45	3.21429	41	0.911111	1	21	1.5	13	0.619048	0.00708025	gene:ENSOMYG00000000210	0	gene:ENSOMYG00000000229	17916	transcript:ENSOMYT00000000320
1	8228001..8228200		6	1	8	1.33333	8	1	1	11	1.83333	4	0.363636	0.00654918	gene:ENSOMYG00000000210	14113	gene:ENSOMYG00000000229	1916
1	8243001..8243200		4	1	10	2.5	9	0.9	1	5	1.25	0	0	0.001998	gene:ENSOMYG00000000229	11434	gene:ENSOMYG00000000279	10621
1	8393401..8393600		14	1	37	2.64286	36	0.972973	1	25	1.78571	18	0.72	0.00558028	gene:ENSOMYG00000058338	52583	TSC22D2	0	TSC22D2-201, TSC22D2-202
1	8403601..8403800		12	1	26	2.16667	23	0.884615	1	16	1.33333	7	0.4375	0.00293558	gene:ENSOMYG00000058338	62783	TSC22D2	0	TSC22D2-201, TSC22D2-202
1	8452401..8452600		7	1	9	1.28571	9	1	1	4	0.571429	0	0	0.0013986	TSC22D2	31444	PFN2	34128
1	8497001..8497200		12	1	16	1.33333	16	1	1	22	1.83333	13	0.590909	0.00305144	PFN2	4156	RNF13	0	RNF13-201
1	8512801..8513000		23	1	44	1.91304	31	0.704545	1	13	0.565217	2	0.153846	0.000575787	PFN2	19956	RNF13	0	RNF13-201, RNF13-203, RNF13-202, RNF13-204
1	8525801..8526000		10	1	33	3.3	26	0.787879	1	16	1.6	4	0.25	0.000446883	PFN2	32956	RNF13	0	RNF13-201, RNF13-203, RNF13-202, RNF13-204
1	8555801..8556000		18	1	37	2.05556	36	0.972973	1	5	0.277778	2	0.4	0.00335031	PFN2	62956	RNF13	0	RNF13-201, RNF13-203, RNF13-202, RNF13-204
1	8566801..8567000		16	1	51	3.1875	51	1	1	32	2	24	0.75	0.000266669	PFN2	73956	RNF13	0	RNF13-201, RNF13-203, RNF13-202, RNF13-204
1	8666001..8666200		13	1	6	0.461538	6	1	1	8	0.615385	2	0.25	0.00932401	gene:ENSOMYG00000061267	34068	gene:ENSOMYG00000000431	98788
1	8775401..8775600		14	1	44	3.14286	42	0.954545	1	23	1.64286	16	0.695652	0.00594769	gene:ENSOMYG00000000431	5488	ANKUB1	17547
1	8806401..8806600		2	1	14	7	12	0.857143	1	13	6.5	3	0.230769	0.0015607	ANKUB1	5733	mrpl47	58375
1	8880401..8880600		8	1	16	2	14	0.875	1	11	1.375	4	0.363636	0.00902423	usp13	0	PEX5L	41997	usp13-201, usp13-203, usp13-202, usp13-206, usp13-207, usp13-205, usp13-204
1	8885601..8885800		15	1	16	1.06667	15	0.9375	1	30	2	10	0.333333	7.12934e-05	usp13	0	PEX5L	36797	usp13-201, usp13-203, usp13-202, usp13-206, usp13-207, usp13-205, usp13-204
1	8920201..8920400		11	1	49	4.45455	36	0.734694	1	30	2.72727	13	0.433333	0.00744855	usp13	6954	PEX5L	2197
1	8923001..8923200		8	1	14	1.75	13	0.928571	1	18	2.25	7	0.388889	0.00205542	usp13	9754	PEX5L	0	PEX5L-201
1	8923201..8923400		18	1	30	1.66667	22	0.733333	1	54	3	24	0.444444	0.00952396	usp13	9954	PEX5L	0	PEX5L-201
1	8960201..8960400		18	1	60	3.33333	52	0.866667	1	8	0.444444	3	0.375	0.00492537	usp13	46954	PEX5L	0	PEX5L-201
1	9023201..9023400		9	1	12	1.33333	10	0.833333	1	14	1.55556	4	0.285714	0.00730246	usp13	109954	PEX5L	0	PEX5L-201
1	9032201..9032400		15	1	27	1.8	18	0.666667	1	26	1.73333	6	0.230769	0.00159018	usp13	118954	PEX5L	0	PEX5L-201
1	9088801..9089000		6	1	18	3	15	0.833333	1	7	1.16667	1	0.142857	0.00287081	usp13	175554	PEX5L	0	PEX5L-201
1	9120401..9120600		20	1	17	0.85	16	0.941176	1	11	0.55	5	0.454545	0.00691193	PEX5L	21501	gene:ENSOMYG00000068924	31052
1	9139601..9139800		9	1	24	2.66667	17	0.708333	1	5	0.555556	0	0	0.00666919	PEX5L	40701	gene:ENSOMYG00000068924	11852
1	9348001..9348200		22	1	61	2.77273	47	0.770492	1	34	1.54545	17	0.5	0.0071629	htr2b	75620	acap2b	0	acap2b-205, acap2b-204, acap2b-203, acap2b-202, acap2b-201, acap2b-206, acap2b-209, acap2b-208, acap2b-207, acap2b-210
1	9403801..9404000		14	1	53	3.78571	41	0.773585	1	19	1.35714	4	0.210526	2.36397e-05	acap2b	19694	ppp1r2	0	ppp1r2-201
1	9577001..9577200		23	1	42	1.82609	40	0.952381	1	48	2.08696	36	0.75	0.00758633	gene:ENSOMYG00000077256	127278	gene:ENSOMYG00000050970	0	transcript:ENSOMYT00000054842, transcript:ENSOMYT00000074317
1	9799001..9799200		17	1	9	0.529412	9	1	1	21	1.23529	1	0.047619	6.98951e-07	gene:ENSOMYG00000070385	35637	gene:ENSOMYG00000058510	29397
1	10079401..10079600		10	1	18	1.8	9	0.5	1	22	2.2	1	0.0454545	0.0013135	MFN1	26	ftsj3	7323
1	10385001..10385200		29	1	62	2.13793	46	0.741935	1	26	0.896552	7	0.269231	4.84093e-05	tbxa2r	203605	gene:ENSOMYG00000064400	0	transcript:ENSOMYT00000122267, transcript:ENSOMYT00000150523, transcript:ENSOMYT00000134970, transcript:ENSOMYT00000137795, transcript:ENSOMYT00000162352, transcript:ENSOMYT00000119498, transcript:ENSOMYT00000156611, transcript:ENSOMYT00000127302, transcript:ENSOMYT00000148326, transcript:ENSOMYT00000131183
1	10394001..10394200		12	1	18	1.5	11	0.611111	1	22	1.83333	4	0.181818	0.00654882	tbxa2r	212605	gene:ENSOMYG00000064400	0	transcript:ENSOMYT00000122267, transcript:ENSOMYT00000150523, transcript:ENSOMYT00000134970, transcript:ENSOMYT00000137795, transcript:ENSOMYT00000162352, transcript:ENSOMYT00000119498, transcript:ENSOMYT00000156611, transcript:ENSOMYT00000127302, transcript:ENSOMYT00000148326, transcript:ENSOMYT00000131183
1	10532401..10532600		2	1	6	3	6	1	1	5	2.5	0	0	0.0021645	tbxa2r	351005	gene:ENSOMYG00000064400	0	transcript:ENSOMYT00000119498, transcript:ENSOMYT00000156611, transcript:ENSOMYT00000127302, transcript:ENSOMYT00000148326, transcript:ENSOMYT00000131183
1	10549201..10549400		7	1	12	1.71429	12	1	1	10	1.42857	5	0.5	0.00956938	tbxa2r	367805	gene:ENSOMYG00000064400	0	transcript:ENSOMYT00000119498, transcript:ENSOMYT00000156611, transcript:ENSOMYT00000127302, transcript:ENSOMYT00000148326, transcript:ENSOMYT00000131183
1	10588401..10588600		18	1	49	2.72222	15	0.306122	1	16	0.888889	0	0	0.00759775	tbxa2r	407005	gene:ENSOMYG00000064400	0	transcript:ENSOMYT00000119498, transcript:ENSOMYT00000156611, transcript:ENSOMYT00000127302, transcript:ENSOMYT00000148326, transcript:ENSOMYT00000131183
1	10590801..10591000		6	1	6	1	5	0.833333	1	8	1.33333	0	0	0.002997	tbxa2r	409405	gene:ENSOMYG00000064400	0	transcript:ENSOMYT00000119498, transcript:ENSOMYT00000156611, transcript:ENSOMYT00000127302, transcript:ENSOMYT00000148326, transcript:ENSOMYT00000131183
1	10701401..10701600		12	1	12	1	11	0.916667	1	6	0.5	1	0.166667	0.00393234	gene:ENSOMYG00000070894	302066	gene:ENSOMYG00000004896	163895
1	10773801..10774000		39	1	22	0.564103	19	0.863636	1	26	0.666667	10	0.384615	0.000774302	gene:ENSOMYG00000070894	374466	gene:ENSOMYG00000004896	91495
1	10796601..10796800		16	1	28	1.75	23	0.821429	1	14	0.875	1	0.0714286	3.948e-06	gene:ENSOMYG00000070894	397266	gene:ENSOMYG00000004896	68695
1	10806801..10807000		10	1	19	1.9	8	0.421053	1	19	1.9	1	0.0526316	0.00937624	gene:ENSOMYG00000070894	407466	gene:ENSOMYG00000004896	58495
1	10835801..10836000		16	1	28	1.75	9	0.321429	1	34	2.125	2	0.0588235	0.00854353	gene:ENSOMYG00000070894	436466	gene:ENSOMYG00000004896	29495
1	10845801..10846000		12	1	7	0.583333	6	0.857143	1	16	1.33333	1	0.0625	0.000460929	gene:ENSOMYG00000070894	446466	gene:ENSOMYG00000004896	19495
1	10952601..10952800		4	1	11	2.75	11	1	1	13	3.25	5	0.384615	0.0017499	gene:ENSOMYG00000004896	86308	gene:ENSOMYG00000066898	190579
1	10964201..10964400		30	1	27	0.9	25	0.925926	1	20	0.666667	10	0.5	0.0013303	gene:ENSOMYG00000004896	97908	gene:ENSOMYG00000066898	178979
1	11069801..11070000		22	1	13	0.590909	11	0.846154	1	17	0.772727	5	0.294118	0.00353648	gene:ENSOMYG00000004896	203508	gene:ENSOMYG00000066898	73379
1	11185001..11185200		6	1	16	2.66667	15	0.9375	1	6	1	2	0.333333	0.00934154	gene:ENSOMYG00000066898	38672	kdm4b	128920
1	11188801..11189000		19	1	26	1.36842	25	0.961538	1	32	1.68421	21	0.65625	0.00401486	gene:ENSOMYG00000066898	42472	kdm4b	125120
1	11246801..11247000		21	1	42	2	38	0.904762	1	11	0.52381	3	0.272727	7.16288e-05	gene:ENSOMYG00000066898	100472	kdm4b	67120
1	11279801..11280000		9	1	13	1.44444	10	0.769231	1	5	0.555556	0	0	0.00653595	gene:ENSOMYG00000066898	133472	kdm4b	34120
1	11391201..11391400		10	1	25	2.5	25	1	1	31	3.1	23	0.741935	0.00555351	gene:ENSOMYG00000066898	244872	kdm4b	0	kdm4b-202, kdm4b-201, kdm4b-203
1	11395801..11396000		46	1	29	0.630435	28	0.965517	1	113	2.45652	86	0.761062	0.00780435	gene:ENSOMYG00000066898	249472	kdm4b	0	kdm4b-202, kdm4b-201, kdm4b-203
1	11396801..11397000		16	1	25	1.5625	25	1	1	21	1.3125	15	0.714286	0.00579322	gene:ENSOMYG00000066898	250472	kdm4b	0	kdm4b-202, kdm4b-201, kdm4b-203
1	11502001..11502200		22	1	76	3.45455	67	0.881579	1	11	0.5	5	0.454545	0.00275108	OPA1	0	gene:ENSOMYG00000008127	162775	OPA1-204, OPA1-203, OPA1-202
1	11511001..11511200		4	1	6	1.5	5	0.833333	1	7	1.75	0	0	0.004662	OPA1	0	gene:ENSOMYG00000008127	153775	OPA1-204, OPA1-203, OPA1-202
1	11548601..11548800		12	1	27	2.25	12	0.444444	1	18	1.5	0	0	0.000604445	OPA1	35518	gene:ENSOMYG00000008127	116175
1	11565201..11565400		7	1	8	1.14286	8	1	1	5	0.714286	1	0.2	0.00699301	OPA1	52118	gene:ENSOMYG00000008127	99575
1	11576401..11576600		12	1	15	1.25	14	0.933333	1	15	1.25	7	0.466667	0.00709645	OPA1	63318	gene:ENSOMYG00000008127	88375
1	11606001..11606200		10	1	37	3.7	29	0.783784	1	16	1.6	6	0.375	0.00554999	OPA1	92918	gene:ENSOMYG00000008127	58775
1	11607001..11607200		6	1	29	4.83333	29	1	1	11	1.83333	6	0.545455	0.000702119	OPA1	93918	gene:ENSOMYG00000008127	57775
1	11627801..11628000		18	1	45	2.5	43	0.955556	1	20	1.11111	14	0.7	0.00831853	OPA1	114718	gene:ENSOMYG00000008127	36975
1	11672001..11672200		13	1	38	2.92308	27	0.710526	1	43	3.30769	16	0.372093	0.00221032	gene:ENSOMYG00000008127	5308	GP5	126632
1	11672201..11672400		25	1	62	2.48	59	0.951613	1	22	0.88	14	0.636364	0.000703941	gene:ENSOMYG00000008127	5508	GP5	126432
1	11746201..11746400		18	1	32	1.77778	16	0.5	1	37	2.05556	1	0.027027	3.82343e-06	gene:ENSOMYG00000008127	79508	GP5	52432
1	11784401..11784600		10	1	12	1.2	9	0.75	1	11	1.1	1	0.0909091	0.00217295	gene:ENSOMYG00000008127	117708	GP5	14232
1	11866601..11866800		4	1	15	3.75	15	1	1	6	1.5	2	0.333333	0.00250627	gene:ENSOMYG00000008289	0	gene:ENSOMYG00000008342	36982	transcript:ENSOMYT00000018581, transcript:ENSOMYT00000018596, transcript:ENSOMYT00000018605, transcript:ENSOMYT00000018652
1	11948801..11949000		10	1	24	2.4	16	0.666667	1	19	1.9	4	0.210526	0.00334167	gene:ENSOMYG00000008725	0	cpox	88925	transcript:ENSOMYT00000021202, transcript:ENSOMYT00000021455, transcript:ENSOMYT00000021431
1	12117001..12117200		18	1	144	8	113	0.784722	1	143	7.94444	93	0.65035	0.00811127	gene:ENSOMYG00000059319	7350	nexn	6849
1	12124601..12124800		10	1	11	1.1	11	1	1	13	1.3	6	0.461538	0.00495805	nexn	0	gene:ENSOMYG00000009906	30131	nexn-202, nexn-201, nexn-203, nexn-204
1	12218801..12219000		15	1	33	2.2	31	0.939394	1	28	1.86667	17	0.607143	0.00188537	gene:ENSOMYG00000057480	21946	gene:ENSOMYG00000009953	17447
1	12243401..12243600		8	1	19	2.375	19	1	1	17	2.125	11	0.647059	0.00635386	gene:ENSOMYG00000009953	6620	gene:ENSOMYG00000009983	7856
1	12258001..12258200		13	1	35	2.69231	23	0.657143	1	11	0.846154	2	0.181818	0.00729714	gene:ENSOMYG00000009983	5181	gene:ENSOMYG00000075220	26843
1	12275801..12276000		14	1	48	3.42857	40	0.833333	1	11	0.785714	4	0.363636	0.00344319	gene:ENSOMYG00000009983	22981	gene:ENSOMYG00000075220	9043
1	12295801..12296000		18	1	36	2	36	1	1	43	2.38889	34	0.790698	0.00273999	gene:ENSOMYG00000053352	0	guk1b	17670	transcript:ENSOMYT00000165946
1	12458601..12458800		6	1	21	3.5	20	0.952381	1	27	4.5	16	0.592593	0.0041795	gene:ENSOMYG00000010068	65115	dmap1	0	dmap1-203, dmap1-201, dmap1-202
1	12523801..12524000		8	1	17	2.125	11	0.647059	1	18	2.25	2	0.111111	0.00135964	elovl8b	27229	gene:ENSOMYG00000010401	0	transcript:ENSOMYT00000023746
1	12524401..12524600		11	1	11	1	9	0.818182	1	16	1.45455	2	0.125	0.000519792	elovl8b	27829	gene:ENSOMYG00000010401	0	transcript:ENSOMYT00000023746
1	12542201..12542400		13	1	10	0.769231	7	0.7	1	29	2.23077	6	0.206897	0.00770552	elovl8b	45629	gene:ENSOMYG00000010401	0	transcript:ENSOMYT00000023746
1	12626201..12626400		13	1	39	3	30	0.769231	1	9	0.692308	2	0.222222	0.00363574	elovl8b	129629	gene:ENSOMYG00000010401	0	transcript:ENSOMYT00000023746
1	12698801..12699000		8	1	7	0.875	7	1	1	3	0.375	0	0	0.00833333	acot11b	4567	gene:ENSOMYG00000011638	0	transcript:ENSOMYT00000026863
1	12772001..12772200		19	1	49	2.57895	49	1	1	45	2.36842	38	0.844444	0.00443339	tnni3k	6994	gene:ENSOMYG00000003219	18079
1	12790201..12790400		22	1	30	1.36364	9	0.3	1	36	1.63636	0	0	0.000386532	tnni3k	25194	gene:ENSOMYG00000003219	0	transcript:ENSOMYT00000007024
1	12837801..12838000		8	1	21	2.625	20	0.952381	1	14	1.75	7	0.5	0.00318982	gene:ENSOMYG00000003219	34840	slc44a5b	0	slc44a5b-201, slc44a5b-206, slc44a5b-205, slc44a5b-203, slc44a5b-204, slc44a5b-202, slc44a5b-207
1	12912401..12912600		16	1	52	3.25	46	0.884615	1	19	1.1875	11	0.578947	0.00750073	st6galnac5b	0	gene:ENSOMYG00000062055	33861	st6galnac5b-201
1	12956201..12956400		10	1	31	3.1	28	0.903226	1	9	0.9	4	0.444444	0.0078871	gene:ENSOMYG00000062055	6757	ptgfr	55285
1	12965001..12965200		23	1	61	2.65217	57	0.934426	1	13	0.565217	7	0.538462	0.00133582	gene:ENSOMYG00000062055	15557	ptgfr	46485
1	12984801..12985000		9	1	21	2.33333	17	0.809524	1	10	1.11111	3	0.3	0.009214	gene:ENSOMYG00000062055	35357	ptgfr	26685
1	13203201..13203400		18	1	57	3.16667	49	0.859649	1	26	1.44444	10	0.384615	2.10731e-05	gene:ENSOMYG00000055131	45854	gene:ENSOMYG00000063922	2610
1	13205401..13205600		11	1	13	1.18182	13	1	1	6	0.545455	2	0.333333	0.00386997	gene:ENSOMYG00000055131	48054	gene:ENSOMYG00000063922	410
1	13229601..13229800		8	1	13	1.625	12	0.923077	1	11	1.375	3	0.272727	0.0016826	gene:ENSOMYG00000060298	8025	gene:ENSOMYG00000003997	0	transcript:ENSOMYT00000008668, transcript:ENSOMYT00000008649
1	13281801..13282000		8	1	16	2	8	0.5	1	11	1.375	0	0	0.0057971	gene:ENSOMYG00000004113	7556	gene:ENSOMYG00000004120	9856
1	13345601..13345800		12	1	30	2.5	28	0.933333	1	4	0.333333	1	0.25	0.00636105	gene:ENSOMYG00000076441	4919	gene:ENSOMYG00000004435	10159
1	13406801..13407000		8	1	18	2.25	17	0.944444	1	8	1	3	0.375	0.00449985	gene:ENSOMYG00000060476	13245	gene:ENSOMYG00000004503	2056
1	13437401..13437600		17	1	15	0.882353	11	0.733333	1	27	1.58824	8	0.296296	0.00775953	gene:ENSOMYG00000071077	0	patj	7212	transcript:ENSOMYT00000154012
1	13451801..13452000		18	1	24	1.33333	19	0.791667	1	16	0.888889	4	0.25	0.000941654	gene:ENSOMYG00000071077	10270	patj	0	patj-203, patj-202, patj-201
1	13586401..13586600		8	1	24	3	20	0.833333	1	6	0.75	0	0	0.000353669	gene:ENSOMYG00000071077	144870	patj	0	patj-202, patj-201
1	13614601..13614800		13	1	10	0.769231	10	1	1	14	1.07692	7	0.5	0.00991609	gene:ENSOMYG00000071077	173070	patj	0	patj-202, patj-201
1	13698801..13699000		22	1	27	1.22727	25	0.925926	1	36	1.63636	20	0.555556	0.00108404	gene:ENSOMYG00000071077	257270	patj	0	patj-202, patj-201
1	13705001..13705200		6	1	13	2.16667	11	0.846154	1	6	1	1	0.166667	0.00954592	gene:ENSOMYG00000071077	263470	patj	0	patj-202, patj-201
1	13740401..13740600		8	1	13	1.625	12	0.923077	1	13	1.625	3	0.230769	0.000491318	tm2d1	0	nfia	48258	tm2d1-201
1	13746601..13746800		19	1	28	1.47368	28	1	1	28	1.47368	16	0.571429	5.44818e-05	tm2d1	0	nfia	42058	tm2d1-201
1	13924601..13924800		19	1	23	1.21053	21	0.913043	1	21	1.10526	9	0.428571	0.00068862	tm2d1	170917	nfia	0	nfia-203, nfia-202, nfia-201, nfia-204, nfia-208, nfia-207, nfia-206, nfia-205, nfia-209, nfia-210
1	14046601..14046800		5	1	9	1.8	7	0.777778	1	9	1.8	0	0	0.00113122	tm2d1	292917	nfia	0	nfia-203, nfia-202, nfia-201, nfia-205
1	14067001..14067200		12	1	24	2	23	0.958333	1	15	1.25	9	0.6	0.00822804	tm2d1	313317	nfia	0	nfia-203, nfia-202, nfia-201, nfia-205
1	14067201..14067400		16	1	9	0.5625	9	1	1	28	1.75	14	0.5	0.00656886	tm2d1	313517	nfia	0	nfia-203, nfia-202, nfia-201, nfia-205
1	14097001..14097200		16	1	38	2.375	34	0.894737	1	28	1.75	17	0.607143	0.00696672	nfia	7974	gene:ENSOMYG00000053425	48153
1	14104201..14104400		6	1	20	3.33333	13	0.65	1	15	2.5	1	0.0666667	0.000517923	nfia	15174	gene:ENSOMYG00000053425	40953
1	14104401..14104600		14	1	34	2.42857	19	0.558824	1	21	1.5	3	0.142857	0.00213766	nfia	15374	gene:ENSOMYG00000053425	40753
1	14169401..14169600		20	1	63	3.15	59	0.936508	1	10	0.5	5	0.5	0.00163454	atpaf1	0	gene:ENSOMYG00000075308	4915	atpaf1-201
1	14173601..14173800		22	1	42	1.90909	11	0.261905	1	35	1.59091	1	0.0285714	0.00437771	atpaf1	2001	gene:ENSOMYG00000075308	715
1	14243201..14243400		9	1	18	2	18	1	1	18	2	11	0.611111	0.00381232	axdnd1	0	gene:ENSOMYG00000066248	7088	axdnd1-203, axdnd1-202, axdnd1-201
1	14258201..14258400		11	1	10	0.909091	10	1	1	6	0.545455	1	0.166667	0.00137363	gene:ENSOMYG00000066248	0	gene:ENSOMYG00000005017	84916	transcript:ENSOMYT00000126242, transcript:ENSOMYT00000116668
1	14345201..14345400		6	1	13	2.16667	7	0.538462	1	13	2.16667	0	0	0.0026087	gene:ENSOMYG00000005017	846	FAM163A	104
1	14404801..14405000		10	1	25	2.5	23	0.92	1	10	1	4	0.4	0.00280615	gene:ENSOMYG00000006423	0	gene:ENSOMYG00000069160	49760	transcript:ENSOMYT00000016261, transcript:ENSOMYT00000016201, transcript:ENSOMYT00000016137, transcript:ENSOMYT00000015765, transcript:ENSOMYT00000016235, transcript:ENSOMYT00000016185, transcript:ENSOMYT00000016176, transcript:ENSOMYT00000016348, transcript:ENSOMYT00000016308, transcript:ENSOMYT00000016331
1	14437401..14437600		4	1	30	7.5	25	0.833333	1	30	7.5	15	0.5	0.00634947	gene:ENSOMYG00000006423	0	gene:ENSOMYG00000069160	17160	transcript:ENSOMYT00000016261, transcript:ENSOMYT00000016201, transcript:ENSOMYT00000016137, transcript:ENSOMYT00000015765, transcript:ENSOMYT00000016235, transcript:ENSOMYT00000016185, transcript:ENSOMYT00000016176, transcript:ENSOMYT00000016348, transcript:ENSOMYT00000016308, transcript:ENSOMYT00000016331
1	14551801..14552000		16	1	20	1.25	18	0.9	1	37	2.3125	15	0.405405	0.000253233	gene:ENSOMYG00000056081	13086	gene:ENSOMYG00000007584	101131
1	14552201..14552400		16	1	67	4.1875	42	0.626866	1	40	2.5	13	0.325	0.00226023	gene:ENSOMYG00000056081	13486	gene:ENSOMYG00000007584	100731
1	14583201..14583400		20	1	56	2.8	18	0.321429	1	54	2.7	3	0.0555556	0.000314266	gene:ENSOMYG00000056081	44486	gene:ENSOMYG00000007584	69731
1	14583801..14584000		7	1	19	2.71429	13	0.684211	1	13	1.85714	2	0.153846	0.00401493	gene:ENSOMYG00000056081	45086	gene:ENSOMYG00000007584	69131
1	14591201..14591400		34	1	52	1.52941	42	0.807692	1	35	1.02941	18	0.514286	0.00395564	gene:ENSOMYG00000056081	52486	gene:ENSOMYG00000007584	61731
1	14775601..14775800		3	1	7	2.33333	7	1	1	3	1	0	0	0.00833333	gene:ENSOMYG00000007584	120943	gene:ENSOMYG00000007826	182793
1	14782401..14782600		8	1	21	2.625	12	0.571429	1	25	3.125	2	0.08	0.000389293	gene:ENSOMYG00000007584	127743	gene:ENSOMYG00000007826	175993
1	14843601..14843800		8	1	24	3	17	0.708333	1	22	2.75	3	0.136364	0.000100751	gene:ENSOMYG00000007584	188943	gene:ENSOMYG00000007826	114793
1	14947001..14947200		4	1	7	1.75	7	1	1	3	0.75	0	0	0.00833333	gene:ENSOMYG00000007584	292343	gene:ENSOMYG00000007826	11393
1	15024201..15024400		11	1	14	1.27273	4	0.285714	1	30	2.72727	0	0	0.00737379	gene:ENSOMYG00000052574	2205	elav1	18
1	15042201..15042400		6	1	12	2	10	0.833333	1	5	0.833333	0	0	0.00339367	gene:ENSOMYG00000061537	0	rc3h1a	95261	transcript:ENSOMYT00000143601
1	15061201..15061400		6	1	11	1.83333	9	0.818182	1	7	1.16667	1	0.142857	0.00904977	gene:ENSOMYG00000061537	0	rc3h1a	76261	transcript:ENSOMYT00000143601
1	15096801..15097000		7	1	12	1.71429	10	0.833333	1	14	2	2	0.142857	0.000639386	gene:ENSOMYG00000061537	16860	rc3h1a	40661
1	15191001..15191200		8	1	5	0.625	3	0.6	1	15	1.875	0	0	0.00877193	s1pr1	344	dph5	40583
1	15199401..15199600		12	1	14	1.16667	14	1	1	17	1.41667	10	0.588235	0.00739587	s1pr1	8744	dph5	32183
1	15229001..15229200		14	1	63	4.5	48	0.761905	1	22	1.57143	10	0.454545	0.00921505	s1pr1	38344	dph5	2583
1	15230401..15230600		5	1	6	1.2	6	1	1	6	1.2	1	0.166667	0.00757576	s1pr1	39744	dph5	1183
1	15304001..15304200		6	1	12	2	10	0.833333	1	18	3	6	0.333333	0.00915332	slc30a7	31686	vcam1b	0	vcam1b-201
1	15304601..15304800		11	1	19	1.72727	17	0.894737	1	27	2.45455	14	0.518519	0.00748128	slc30a7	32286	vcam1b	0	vcam1b-201
1	15316801..15317000		10	1	26	2.6	14	0.538462	1	14	1.4	0	0	0.000416156	vcam1b	9874	gene:ENSOMYG00000009104	0	transcript:ENSOMYT00000020576
1	15331001..15331200		21	1	33	1.57143	33	1	1	16	0.761905	11	0.6875	0.00229065	gene:ENSOMYG00000009104	14100	cdc14ab	0	cdc14ab-201, cdc14ab-202, cdc14ab-203
1	15386401..15386600		5	1	5	1	5	1	1	4	0.8	0	0	0.00793651	gene:ENSOMYG00000009104	69500	cdc14ab	0	cdc14ab-201, cdc14ab-202, cdc14ab-203, cdc14ab-204, cdc14ab-205, cdc14ab-206
1	15413401..15413600		8	1	11	1.375	11	1	1	4	0.5	0	0	0.000732601	gene:ENSOMYG00000062660	21616	rtca	0	rtca-203, rtca-202, rtca-201
1	15526801..15527000		20	1	42	2.1	32	0.761905	1	34	1.7	15	0.441176	0.00421751	gene:ENSOMYG00000013357	5435	gene:ENSOMYG00000013389	4761
1	15574401..15574600		21	1	21	1	21	1	1	17	0.809524	9	0.529412	0.000497102	gene:ENSOMYG00000013389	22953	gene:ENSOMYG00000013430	0	transcript:ENSOMYT00000031271, transcript:ENSOMYT00000031305
1	15626401..15626600		12	1	29	2.41667	29	1	1	16	1.33333	10	0.625	0.000983173	reep6	0	gene:ENSOMYG00000000039	10218	reep6-202, reep6-201
1	15656001..15656200		9	1	23	2.55556	17	0.73913	1	18	2	5	0.277778	0.00398664	gene:ENSOMYG00000000039	18099	gene:ENSOMYG00000000090	0	transcript:ENSOMYT00000000109
1	15686801..15687000		7	1	25	3.57143	19	0.76	1	18	2.57143	4	0.222222	0.000611365	gene:ENSOMYG00000000090	27863	gene:ENSOMYG00000000128	28516
1	15886201..15886400		10	1	30	3	25	0.833333	1	22	2.2	9	0.409091	0.00188354	gene:ENSOMYG00000000128	170087	ga45b	18783
1	15907201..15907400		12	1	26	2.16667	8	0.307692	1	31	2.58333	1	0.0322581	0.00573059	ga45b	61	gene:ENSOMYG00000000207	3858
1	15948001..15948200		9	1	17	1.88889	16	0.941176	1	9	1	4	0.444444	0.00966859	gene:ENSOMYG00000000243	0	gene:ENSOMYG00000000287	30402	transcript:ENSOMYT00000000390, transcript:ENSOMYT00000000395
1	16018801..16019000		16	1	15	0.9375	13	0.866667	1	29	1.8125	13	0.448276	0.00771104	gene:ENSOMYG00000000287	36300	gene:ENSOMYG00000000376	0	transcript:ENSOMYT00000000683, transcript:ENSOMYT00000000640
1	16026401..16026600		9	1	9	1	9	1	1	15	1.66667	6	0.4	0.0038279	gene:ENSOMYG00000000287	43900	gene:ENSOMYG00000000376	0	transcript:ENSOMYT00000000683, transcript:ENSOMYT00000000640
1	16051001..16051200		8	1	18	2.25	18	1	1	4	0.5	1	0.25	0.0025974	gene:ENSOMYG00000000376	14583	gene:ENSOMYG00000059647	63802
1	16075601..16075800		24	1	21	0.875	11	0.52381	1	34	1.41667	2	0.0588235	0.00014338	gene:ENSOMYG00000000376	39183	gene:ENSOMYG00000059647	39202
1	16082201..16082400		12	1	27	2.25	26	0.962963	1	19	1.58333	12	0.631579	0.00550355	gene:ENSOMYG00000000376	45783	gene:ENSOMYG00000059647	32602
1	16097401..16097600		7	1	31	4.42857	24	0.774194	1	11	1.57143	3	0.272727	0.00482684	gene:ENSOMYG00000000376	60983	gene:ENSOMYG00000059647	17402
1	16104401..16104600		16	1	32	2	31	0.96875	1	28	1.75	19	0.678571	0.0031056	gene:ENSOMYG00000000376	67983	gene:ENSOMYG00000059647	10402
1	16176001..16176200		14	1	26	1.85714	25	0.961538	1	38	2.71429	24	0.631579	0.00167303	gene:ENSOMYG00000000606	0	gene:ENSOMYG00000000641	4836	transcript:ENSOMYT00000001204, transcript:ENSOMYT00000001207, transcript:ENSOMYT00000001201, transcript:ENSOMYT00000001210
1	16202001..16202200		12	1	49	4.08333	48	0.979592	1	27	2.25	19	0.703704	0.00079647	gene:ENSOMYG00000000606	22376	gene:ENSOMYG00000000641	0	transcript:ENSOMYT00000074066, transcript:ENSOMYT00000001224
1	16219601..16219800		8	1	8	1	7	0.875	1	8	1	1	0.125	0.00505051	gene:ENSOMYG00000000606	39976	gene:ENSOMYG00000000641	0	transcript:ENSOMYT00000074066, transcript:ENSOMYT00000001224
1	16239801..16240000		5	1	8	1.6	8	1	1	4	0.8	0	0	0.0020202	gene:ENSOMYG00000000606	60176	gene:ENSOMYG00000000641	0	transcript:ENSOMYT00000074066, transcript:ENSOMYT00000001224
1	16276401..16276600		10	1	23	2.3	22	0.956522	1	12	1.2	5	0.416667	0.000795001	gene:ENSOMYG00000000606	96776	gene:ENSOMYG00000000641	0	transcript:ENSOMYT00000074066, transcript:ENSOMYT00000001224
1	16281601..16281800		7	1	15	2.14286	15	1	1	3	0.428571	0	0	0.00122549	gene:ENSOMYG00000000606	101976	gene:ENSOMYG00000000641	0	transcript:ENSOMYT00000074066, transcript:ENSOMYT00000001224
1	16301201..16301400		5	1	30	6	27	0.9	1	5	1	1	0.2	0.00308349	gene:ENSOMYG00000000641	5395	gene:ENSOMYG00000000650	19994
1	16397801..16398000		12	1	14	1.16667	13	0.928571	1	12	1	4	0.333333	0.00228833	gene:ENSOMYG00000000641	101995	gene:ENSOMYG00000000650	0	transcript:ENSOMYT00000001259, transcript:ENSOMYT00000148753
1	16410801..16411000		22	1	49	2.22727	47	0.959184	1	6	0.272727	3	0.5	0.00697403	gene:ENSOMYG00000000641	114995	gene:ENSOMYG00000000650	0	transcript:ENSOMYT00000001259, transcript:ENSOMYT00000148753
1	16425401..16425600		12	1	19	1.58333	17	0.894737	1	12	1	5	0.416667	0.00719526	gene:ENSOMYG00000000650	10003	gene:ENSOMYG00000000662	642
1	16786201..16786400		11	1	32	2.90909	18	0.5625	1	10	0.909091	0	0	0.00133288	gene:ENSOMYG00000049809	60657	gene:ENSOMYG00000000713	19286
1	16793201..16793400		11	1	13	1.18182	12	0.923077	1	16	1.45455	6	0.375	0.00313527	gene:ENSOMYG00000049809	67657	gene:ENSOMYG00000000713	12286
1	16938201..16938400		9	1	21	2.33333	19	0.904762	1	14	1.55556	6	0.428571	0.00366965	JUND	2831	rab3ab	5681
1	17048201..17048400		29	1	29	1	26	0.896552	1	76	2.62069	43	0.565789	0.000891381	gene:ENSOMYG00000051812	36283	gene:ENSOMYG00000001565	2042
1	17206401..17206600		11	1	16	1.45455	16	1	1	15	1.36364	9	0.6	0.00679768	gene:ENSOMYG00000002896	43076	gene:ENSOMYG00000003919	0	transcript:ENSOMYT00000008684, transcript:ENSOMYT00000008717, transcript:ENSOMYT00000008735
1	17217401..17217600		30	1	109	3.63333	96	0.880734	1	52	1.73333	37	0.711538	0.00883376	gene:ENSOMYG00000003919	4019	gene:ENSOMYG00000004082	26978
1	17327001..17327200		60	1	43	0.716667	26	0.604651	1	88	1.46667	13	0.147727	1.69321e-07	gene:ENSOMYG00000073050	41196	comp	0	comp-201
1	17346201..17346400		8	1	24	3	24	1	1	12	1.5	8	0.666667	0.00840336	SMIM7	0	MED26	7968	SMIM7-201
1	17354801..17355000		10	1	19	1.9	17	0.894737	1	15	1.5	7	0.466667	0.00913978	MED26	0	SLC35E1	12340	MED26-201
1	17412801..17413000		10	1	16	1.6	14	0.875	1	15	1.5	5	0.333333	0.00271155	gene:ENSOMYG00000050243	34054	gene:ENSOMYG00000069589	4325
1	17420401..17420600		10	1	7	0.7	4	0.571429	1	12	1.2	0	0	0.00902993	gene:ENSOMYG00000069589	2052	gene:ENSOMYG00000004592	0	transcript:ENSOMYT00000010036
1	17422401..17422600		10	1	19	1.9	19	1	1	9	0.9	5	0.555556	0.00615385	gene:ENSOMYG00000004592	0	gene:ENSOMYG00000004605	13711	transcript:ENSOMYT00000010036
1	17427401..17427600		9	1	22	2.44444	18	0.818182	1	18	2	7	0.388889	0.00654882	gene:ENSOMYG00000004592	0	gene:ENSOMYG00000004605	8711	transcript:ENSOMYT00000010036
1	17480601..17480800		10	1	20	2	20	1	1	18	1.8	12	0.666667	0.00672443	gene:ENSOMYG00000005489	0	r3hdm4	38106	transcript:ENSOMYT00000012724, transcript:ENSOMYT00000012751, transcript:ENSOMYT00000012655, transcript:ENSOMYT00000012693, transcript:ENSOMYT00000012774, transcript:ENSOMYT00000012786, transcript:ENSOMYT00000012733, transcript:ENSOMYT00000012221, transcript:ENSOMYT00000012714
1	17481201..17481400		4	1	14	3.5	10	0.714286	1	11	2.75	1	0.0909091	0.00255194	gene:ENSOMYG00000005489	0	r3hdm4	37506	transcript:ENSOMYT00000012724, transcript:ENSOMYT00000012751, transcript:ENSOMYT00000012655, transcript:ENSOMYT00000012693, transcript:ENSOMYT00000012774, transcript:ENSOMYT00000012786, transcript:ENSOMYT00000012733, transcript:ENSOMYT00000012221, transcript:ENSOMYT00000012714
1	17520001..17520200		8	1	21	2.625	13	0.619048	1	26	3.25	6	0.230769	0.00793962	r3hdm4	0	gene:ENSOMYG00000065844	31919	r3hdm4-201, r3hdm4-202
1	17521801..17522000		15	1	51	3.4	51	1	1	44	2.93333	38	0.863636	0.00812218	r3hdm4	0	gene:ENSOMYG00000065844	30119	r3hdm4-201, r3hdm4-202
1	17527601..17527800		5	1	3	0.6	3	1	1	9	1.8	0	0	0.00454545	r3hdm4	4396	gene:ENSOMYG00000065844	24319
1	17606401..17606600		13	1	11	0.846154	11	1	1	8	0.615385	3	0.375	0.00481596	gene:ENSOMYG00000005988	4735	gene:ENSOMYG00000006926	0	transcript:ENSOMYT00000016647, transcript:ENSOMYT00000016845
1	17639601..17639800		12	1	17	1.41667	8	0.470588	1	17	1.41667	0	0	0.00133894	ndufs7	1934	gamt	505
1	17882001..17882200		9	1	17	1.88889	16	0.941176	1	14	1.55556	4	0.285714	0.000205274	gene:ENSOMYG00000009094	84123	gene:ENSOMYG00000010617	0	transcript:ENSOMYT00000041016, transcript:ENSOMYT00000041044, transcript:ENSOMYT00000040795, transcript:ENSOMYT00000041075, transcript:ENSOMYT00000040427, transcript:ENSOMYT00000040262, transcript:ENSOMYT00000040310, transcript:ENSOMYT00000040302, transcript:ENSOMYT00000040807, transcript:ENSOMYT00000040711
1	18023201..18023400		4	1	8	2	8	1	1	4	1	0	0	0.0020202	KCNN1	21324	ATP13A3	0	ATP13A3-207, ATP13A3-202, ATP13A3-203, ATP13A3-205, ATP13A3-206, ATP13A3-204, ATP13A3-201, ATP13A3-208, ATP13A3-209, ATP13A3-210
1	18100001..18100200		14	1	40	2.85714	21	0.525	1	27	1.92857	4	0.148148	0.00159458	lsg1	1455	fam43a	6868
1	18148001..18148200		8	1	14	1.75	14	1	1	16	2	9	0.5625	0.00561941	gene:ENSOMYG00000073191	16088	XXYLT1	166007
1	18172401..18172600		12	1	37	3.08333	36	0.972973	1	11	0.916667	7	0.636364	0.00740056	gene:ENSOMYG00000073191	40488	XXYLT1	141607
1	18249401..18249600		8	1	18	2.25	18	1	1	6	0.75	3	0.5	0.00988142	gene:ENSOMYG00000073191	117488	XXYLT1	64607
1	18283601..18283800		25	1	47	1.88	47	1	1	7	0.28	4	0.571429	0.00141106	gene:ENSOMYG00000073191	151688	XXYLT1	30407
1	18340401..18340600		10	1	12	1.2	8	0.666667	1	21	2.1	3	0.142857	0.00364762	gene:ENSOMYG00000073191	208488	XXYLT1	0	XXYLT1-201
1	18431001..18431200		9	1	36	4	33	0.916667	1	20	2.22222	12	0.6	0.00679681	SRSF11	39470	gene:ENSOMYG00000020472	0	transcript:ENSOMYT00000049141, transcript:ENSOMYT00000049135, transcript:ENSOMYT00000049111, transcript:ENSOMYT00000049165
1	18433601..18433800		20	1	62	3.1	60	0.967742	1	27	1.35	21	0.777778	0.00873672	SRSF11	42070	gene:ENSOMYG00000020472	0	transcript:ENSOMYT00000049141, transcript:ENSOMYT00000049135, transcript:ENSOMYT00000049111, transcript:ENSOMYT00000049165
1	18608801..18609000		36	1	128	3.55556	121	0.945312	1	21	0.583333	13	0.619048	0.000143181	gene:ENSOMYG00000051809	115438	gene:ENSOMYG00000021538	0	transcript:ENSOMYT00000051419, transcript:ENSOMYT00000051611, transcript:ENSOMYT00000051555, transcript:ENSOMYT00000051704, transcript:ENSOMYT00000051691, transcript:ENSOMYT00000051354, transcript:ENSOMYT00000051622, transcript:ENSOMYT00000051388
1	18609601..18609800		31	1	38	1.22581	26	0.684211	1	42	1.35484	13	0.309524	0.000807404	gene:ENSOMYG00000051809	116238	gene:ENSOMYG00000021538	0	transcript:ENSOMYT00000051419, transcript:ENSOMYT00000051611, transcript:ENSOMYT00000051555, transcript:ENSOMYT00000051704, transcript:ENSOMYT00000051691, transcript:ENSOMYT00000051354, transcript:ENSOMYT00000051622, transcript:ENSOMYT00000051388
1	18661001..18661200		9	1	16	1.77778	16	1	1	8	0.888889	3	0.375	0.00131752	gene:ENSOMYG00000053658	31020	s1pr4	27665
1	18698401..18698600		16	1	42	2.625	42	1	1	52	3.25	44	0.846154	0.00676043	s1pr4	8329	gene:ENSOMYG00000021688	4712
1	18703401..18703600		5	1	12	2.4	11	0.916667	1	13	2.6	5	0.384615	0.00790954	gene:ENSOMYG00000021688	0	gene:ENSOMYG00000002767	26323	transcript:ENSOMYT00000051726
1	18739601..18739800		16	1	46	2.875	37	0.804348	1	21	1.3125	5	0.238095	1.43733e-05	ncln	0	gene:ENSOMYG00000021791	31820	ncln-204, ncln-202, ncln-203, ncln-201, ncln-205
1	18817001..18817200		40	1	39	0.975	37	0.948718	1	43	1.075	31	0.72093	0.00585392	ncln	51774	gene:ENSOMYG00000021791	0	transcript:ENSOMYT00000052053, transcript:ENSOMYT00000052036
1	18827801..18828000		14	1	13	0.928571	12	0.923077	1	22	1.57143	9	0.409091	0.00292515	gene:ENSOMYG00000021791	3108	gene:ENSOMYG00000021822	5546
1	18871601..18871800		13	1	12	0.923077	9	0.75	1	22	1.69231	5	0.227273	0.00452234	tnfaip8l1	18884	mydgf	5704
1	19034201..19034400		8	1	17	2.125	9	0.529412	1	25	3.125	3	0.12	0.00561244	rx1	0	cherp	18357	rx1-201
1	19079201..19079400		8	1	19	2.375	15	0.789474	1	20	2.5	6	0.3	0.00266372	rad23ab	0	EPS15L1	11387	rad23ab-201
1	19120601..19120800		6	1	15	2.5	12	0.8	1	5	0.833333	0	0	0.00361197	EPS15L1	2593	klf2a	8533
1	19174801..19175000		21	1	32	1.52381	31	0.96875	1	15	0.714286	7	0.466667	0.00015479	klf2a	42952	AP1M1	135650
1	19263001..19263200		8	1	10	1.25	9	0.9	1	8	1	2	0.25	0.00904977	klf2a	131152	AP1M1	47450
1	19266001..19266200		5	1	4	0.8	4	1	1	9	1.8	0	0	0.0013986	klf2a	134152	AP1M1	44450
1	19281401..19281600		4	1	15	3.75	12	0.8	1	14	3.5	1	0.0714286	9.54115e-05	klf2a	149552	AP1M1	29050
1	19285001..19285200		8	1	26	3.25	25	0.961538	1	32	4	17	0.53125	0.000191469	klf2a	153152	AP1M1	25450
1	19285201..19285400		4	1	14	3.5	14	1	1	17	4.25	7	0.411765	0.00043849	klf2a	153352	AP1M1	25250
1	19360001..19360200		9	1	3	0.333333	3	1	1	14	1.55556	0	0	0.00147059	safb	0	gene:ENSOMYG00000000132	24737	safb-203, safb-202, safb-201
1	19360201..19360400		14	1	14	1	6	0.428571	1	46	3.28571	0	0	5.99834e-05	safb	0	gene:ENSOMYG00000000132	24537	safb-203, safb-202, safb-201
1	19415201..19415400		14	1	36	2.57143	36	1	1	13	0.928571	8	0.615385	0.000674923	gene:ENSOMYG00000000132	0	gene:ENSOMYG00000074599	29449	transcript:ENSOMYT00000000195, transcript:ENSOMYT00000000199
1	19490601..19490800		30	1	44	1.46667	15	0.340909	1	40	1.33333	2	0.05	0.000769852	lpla	7080	tpm4a	20148
1	19591001..19591200		6	1	16	2.66667	16	1	1	8	1.33333	4	0.5	0.00658762	slc1a6	0	pole4	7778	slc1a6-201, slc1a6-202, slc1a6-203, slc1a6-206, slc1a6-205, slc1a6-204
1	19692001..19692200		10	1	26	2.6	25	0.961538	1	53	5.3	37	0.698113	0.00523337	gene:ENSOMYG00000001372	31512	gene:ENSOMYG00000070591	43963
1	19767601..19767800		18	1	73	4.05556	62	0.849315	1	26	1.44444	14	0.538462	0.00218736	gene:ENSOMYG00000001372	107112	gene:ENSOMYG00000070591	0	transcript:ENSOMYT00000144590
1	19773601..19773800		10	1	19	1.9	16	0.842105	1	33	3.3	14	0.424242	0.00332074	gene:ENSOMYG00000001372	113112	gene:ENSOMYG00000070591	0	transcript:ENSOMYT00000144590
1	19879401..19879600		24	1	37	1.54167	36	0.972973	1	53	2.20833	40	0.754717	0.00371025	gene:ENSOMYG00000060303	8022	gene:ENSOMYG00000001903	1028
1	19902001..19902200		10	1	23	2.3	17	0.73913	1	30	3	10	0.333333	0.00366726	gene:ENSOMYG00000001903	15073	gene:ENSOMYG00000056939	0	transcript:ENSOMYT00000129486, transcript:ENSOMYT00000122241
1	20009801..20010000		10	1	26	2.6	25	0.961538	1	12	1.2	6	0.5	0.00196636	gene:ENSOMYG00000006445	0	gene:ENSOMYG00000059265	61823	transcript:ENSOMYT00000032274, transcript:ENSOMYT00000031834, transcript:ENSOMYT00000035202, transcript:ENSOMYT00000035291, transcript:ENSOMYT00000034043, transcript:ENSOMYT00000035116, transcript:ENSOMYT00000034884, transcript:ENSOMYT00000033828
1	20099401..20099600		25	1	45	1.8	30	0.666667	1	33	1.32	10	0.30303	0.00148872	gene:ENSOMYG00000015162	2580	hnrnpm	80740
1	20110401..20110600		15	1	17	1.13333	12	0.705882	1	7	0.466667	0	0	0.00228833	gene:ENSOMYG00000015162	13580	hnrnpm	69740
1	20114401..20114600		16	1	46	2.875	32	0.695652	1	44	2.75	18	0.409091	0.00562247	gene:ENSOMYG00000015162	17580	hnrnpm	65740
1	20211601..20211800		13	1	9	0.692308	4	0.444444	1	32	2.46154	0	0	0.0012442	gene:ENSOMYG00000016866	11414	gene:ENSOMYG00000017055	0	transcript:ENSOMYT00000039971
1	20308201..20308400		8	1	6	0.75	5	0.833333	1	21	2.625	1	0.047619	0.00042904	rab11ba	91354	gene:ENSOMYG00000017142	0	transcript:ENSOMYT00000041226, transcript:ENSOMYT00000040992
1	20339401..20339600		7	1	17	2.42857	16	0.941176	1	8	1.14286	3	0.375	0.0055336	gene:ENSOMYG00000017619	18409	sbno2b	0	sbno2b-204, sbno2b-203, sbno2b-202, sbno2b-201, sbno2b-206, sbno2b-205
1	20340401..20340600		21	1	48	2.28571	26	0.541667	1	43	2.04762	12	0.27907	0.00972763	gene:ENSOMYG00000017619	19409	sbno2b	0	sbno2b-203, sbno2b-202, sbno2b-201, sbno2b-206, sbno2b-205
1	20362401..20362600		20	1	42	2.1	36	0.857143	1	17	0.85	8	0.470588	0.0036477	gene:ENSOMYG00000017619	41409	sbno2b	0	sbno2b-206, sbno2b-205
1	20494401..20494600		6	1	8	1.33333	8	1	1	5	0.833333	1	0.2	0.00699301	tm6sf2b	0	hapln4	33863	tm6sf2b-201
1	20534601..20534800		15	1	21	1.4	20	0.952381	1	7	0.466667	2	0.285714	0.00118915	hapln4	0	gene:ENSOMYG00000018972	190650	hapln4-201, hapln4-202
1	20534801..20535000		12	1	13	1.08333	12	0.923077	1	18	1.5	5	0.277778	0.000431567	hapln4	0	gene:ENSOMYG00000018972	190450	hapln4-201, hapln4-202
1	20558601..20558800		23	1	39	1.69565	38	0.974359	1	26	1.13043	19	0.730769	0.0053922	hapln4	0	gene:ENSOMYG00000018972	166650	hapln4-201, hapln4-202
1	20560601..20560800		10	1	16	1.6	16	1	1	15	1.5	9	0.6	0.00679768	hapln4	0	gene:ENSOMYG00000018972	164650	hapln4-201, hapln4-202
1	20569001..20569200		12	1	23	1.91667	22	0.956522	1	22	1.83333	13	0.590909	0.0037889	hapln4	4565	gene:ENSOMYG00000018972	156250
1	20585001..20585200		13	1	13	1	12	0.923077	1	5	0.384615	1	0.2	0.00770308	hapln4	20565	gene:ENSOMYG00000018972	140250
1	20655601..20655800		11	1	19	1.72727	12	0.631579	1	15	1.36364	0	0	9.18895e-05	hapln4	91165	gene:ENSOMYG00000018972	69650
1	20658401..20658600		6	1	10	1.66667	10	1	1	3	0.5	0	0	0.0034965	hapln4	93965	gene:ENSOMYG00000018972	66850
1	20665201..20665400		7	1	21	3	14	0.666667	1	31	4.42857	9	0.290323	0.00802118	hapln4	100765	gene:ENSOMYG00000018972	60050
1	20765201..20765400		10	1	21	2.1	21	1	1	8	0.8	4	0.5	0.00294724	gene:ENSOMYG00000018972	12218	nr2c2ap	141219
1	20861801..20862000		12	1	18	1.5	17	0.944444	1	11	0.916667	5	0.454545	0.00553954	gene:ENSOMYG00000018972	108818	nr2c2ap	44619
1	20952401..20952600		12	1	32	2.66667	32	1	1	12	1	7	0.583333	0.000729276	gene:ENSOMYG00000071441	10477	gene:ENSOMYG00000071292	0	transcript:ENSOMYT00000134203
1	20990801..20991000		16	1	20	1.25	19	0.95	1	15	0.9375	7	0.466667	0.00189364	mef2b	7998	tmem161a	0	tmem161a-202, tmem161a-201
1	21220601..21220800		20	1	36	1.8	32	0.888889	1	30	1.5	18	0.6	0.0070694	tssk6	26976	yjefn3	33530
1	21258001..21258200		14	1	46	3.28571	40	0.869565	1	19	1.35714	10	0.526316	0.00484651	yjefn3	0	CILP2	13395	yjefn3-201
1	21324401..21324600		10	1	36	3.6	21	0.583333	1	58	5.8	17	0.293103	0.00508566	CILP2	25125	gene:ENSOMYG00000019574	34062
1	21454001..21454200		6	1	7	1.16667	6	0.857143	1	6	1	0	0	0.00407925	gene:ENSOMYG00000077875	5347	midn	84991
1	21460801..21461000		6	1	11	1.83333	10	0.909091	1	9	1.5	2	0.222222	0.00321505	gene:ENSOMYG00000077875	12147	midn	78191
1	21488001..21488200		4	1	15	3.75	9	0.6	1	16	4	2	0.125	0.00767681	gene:ENSOMYG00000077875	39347	midn	50991
1	21604001..21604200		13	1	27	2.07692	9	0.333333	1	17	1.30769	0	0	0.00661112	gene:ENSOMYG00000076162	25596	atp5f1d	0	atp5f1d-201
1	21613401..21613600		14	1	40	2.85714	40	1	1	59	4.21429	48	0.813559	0.00222031	atp5f1d	9007	CBARP	8844
1	21689401..21689600		6	1	21	3.5	15	0.714286	1	13	2.16667	1	0.0769231	0.000329307	CBARP	62050	STK11	14482
1	21739001..21739200		8	1	27	3.375	8	0.296296	1	20	2.5	0	0	0.00706002	gene:ENSOMYG00000019661	6546	fstl3	997
1	21772801..21773000		12	1	29	2.41667	28	0.965517	1	11	0.916667	6	0.545455	0.0036109	gene:ENSOMYG00000069752	18933	gene:ENSOMYG00000019669	5967
1	21856201..21856400		15	1	27	1.8	27	1	1	21	1.4	15	0.714286	0.00442195	gene:ENSOMYG00000019741	0	NELL2	167596	transcript:ENSOMYT00000047062, transcript:ENSOMYT00000047079, transcript:ENSOMYT00000047091, transcript:ENSOMYT00000133385, transcript:ENSOMYT00000047110, transcript:ENSOMYT00000047161, transcript:ENSOMYT00000047125
1	21893801..21894000		6	1	3	0.5	3	1	1	13	2.16667	1	0.0769231	0.00714286	gene:ENSOMYG00000019741	0	NELL2	129996	transcript:ENSOMYT00000047062, transcript:ENSOMYT00000047079, transcript:ENSOMYT00000047091, transcript:ENSOMYT00000133385, transcript:ENSOMYT00000047110, transcript:ENSOMYT00000047161, transcript:ENSOMYT00000047125
1	21894801..21895000		14	1	32	2.28571	26	0.8125	1	29	2.07143	9	0.310345	8.20875e-05	gene:ENSOMYG00000019741	0	NELL2	128996	transcript:ENSOMYT00000047062, transcript:ENSOMYT00000047079, transcript:ENSOMYT00000047091, transcript:ENSOMYT00000133385, transcript:ENSOMYT00000047110, transcript:ENSOMYT00000047161, transcript:ENSOMYT00000047125
1	21974801..21975000		10	1	26	2.6	26	1	1	21	2.1	14	0.666667	0.0018489	gene:ENSOMYG00000019741	63924	NELL2	48996
1	22020801..22021000		8	1	27	3.375	27	1	1	17	2.125	12	0.705882	0.00569793	gene:ENSOMYG00000019741	109924	NELL2	2996
1	22040001..22040200		12	1	12	1	11	0.916667	1	7	0.583333	2	0.285714	0.00954592	NELL2	0	gene:ENSOMYG00000017060	71710	NELL2-205, NELL2-204, NELL2-203, NELL2-202, NELL2-201, NELL2-206, NELL2-207, NELL2-208, NELL2-209, NELL2-210
1	22044401..22044600		8	1	28	3.5	28	1	1	2	0.25	0	0	0.00229885	NELL2	0	gene:ENSOMYG00000017060	67310	NELL2-205, NELL2-204, NELL2-203, NELL2-202, NELL2-201, NELL2-206, NELL2-207, NELL2-208, NELL2-209, NELL2-210
1	22050001..22050200		5	1	6	1.2	6	1	1	6	1.2	1	0.166667	0.00757576	NELL2	0	gene:ENSOMYG00000017060	61710	NELL2-205, NELL2-204, NELL2-203, NELL2-202, NELL2-201, NELL2-206, NELL2-207, NELL2-208, NELL2-209, NELL2-210
1	22186601..22186800		8	1	11	1.375	9	0.818182	1	17	2.125	5	0.294118	0.00915332	NELL2	78732	gene:ENSOMYG00000017060	0	transcript:ENSOMYT00000040177, transcript:ENSOMYT00000040155, transcript:ENSOMYT00000040105
1	22242201..22242400		24	1	93	3.875	58	0.623656	1	88	3.66667	16	0.181818	8.82108e-10	gene:ENSOMYG00000017356	10602	gene:ENSOMYG00000017613	39005
1	22309801..22310000		16	1	22	1.375	21	0.954545	1	39	2.4375	22	0.564103	0.000902894	gene:ENSOMYG00000017613	0	gene:ENSOMYG00000069570	71167	transcript:ENSOMYT00000046829, transcript:ENSOMYT00000046695, transcript:ENSOMYT00000141995, transcript:ENSOMYT00000046435, transcript:ENSOMYT00000046563, transcript:ENSOMYT00000046464, transcript:ENSOMYT00000117853, transcript:ENSOMYT00000046673, transcript:ENSOMYT00000045178
1	22329201..22329400		28	1	38	1.35714	38	1	1	36	1.28571	27	0.75	0.000851789	gene:ENSOMYG00000017613	0	gene:ENSOMYG00000069570	51767	transcript:ENSOMYT00000046829, transcript:ENSOMYT00000046695, transcript:ENSOMYT00000141995, transcript:ENSOMYT00000046435, transcript:ENSOMYT00000046563, transcript:ENSOMYT00000046464, transcript:ENSOMYT00000117853, transcript:ENSOMYT00000046673, transcript:ENSOMYT00000045178
1	22335801..22336000		12	1	12	1	7	0.583333	1	15	1.25	0	0	0.000891862	gene:ENSOMYG00000017613	0	gene:ENSOMYG00000069570	45167	transcript:ENSOMYT00000046829, transcript:ENSOMYT00000046695, transcript:ENSOMYT00000141995, transcript:ENSOMYT00000046435, transcript:ENSOMYT00000046563, transcript:ENSOMYT00000046464, transcript:ENSOMYT00000117853, transcript:ENSOMYT00000046673, transcript:ENSOMYT00000045178
1	22387401..22387600		28	1	38	1.35714	36	0.947368	1	48	1.71429	30	0.625	0.000305795	gene:ENSOMYG00000069570	5222	zgc:110339	44614	transcript:ENSOMYT00000046695, transcript:ENSOMYT00000141995, transcript:ENSOMYT00000046435, transcript:ENSOMYT00000046563, transcript:ENSOMYT00000046464, transcript:ENSOMYT00000117853, transcript:ENSOMYT00000046673, transcript:ENSOMYT00000045178, transcript:ENSOMYT00000046866
1	22426601..22426800		18	1	85	4.72222	75	0.882353	1	106	5.88889	70	0.660377	0.00025311	gene:ENSOMYG00000069570	44422	zgc:110339	5414
1	22432201..22432400		22	1	10	0.454545	8	0.8	1	25	1.13636	0	0	1.91198e-06	gene:ENSOMYG00000069570	50022	zgc:110339	0	zgc:110339-201
1	22507801..22508000		10	1	15	1.5	15	1	1	15	1.5	8	0.533333	0.00316092	ppp6r3	30325	lrp5	0	lrp5-207, lrp5-206, lrp5-205, lrp5-204, lrp5-203, lrp5-202, lrp5-201
1	22508001..22508200		8	1	17	2.125	16	0.941176	1	21	2.625	8	0.380952	0.00036978	ppp6r3	30525	lrp5	0	lrp5-207, lrp5-206, lrp5-205, lrp5-204, lrp5-203, lrp5-202, lrp5-201
1	22522601..22522800		6	1	13	2.16667	13	1	1	5	0.833333	1	0.2	0.00163399	ppp6r3	45125	lrp5	0	lrp5-206, lrp5-205, lrp5-204, lrp5-203, lrp5-202, lrp5-201
1	22523001..22523200		11	1	10	0.909091	10	1	1	24	2.18182	10	0.416667	0.00140897	ppp6r3	45525	lrp5	0	lrp5-206, lrp5-205, lrp5-204, lrp5-203, lrp5-202, lrp5-201
1	22530001..22530200		11	1	20	1.81818	20	1	1	12	1.09091	7	0.583333	0.00393294	ppp6r3	52525	lrp5	0	lrp5-206, lrp5-205, lrp5-204, lrp5-203, lrp5-202, lrp5-201
1	22588001..22588200		11	1	15	1.36364	13	0.866667	1	24	2.18182	9	0.375	0.00291381	gene:ENSOMYG00000021023	5693	gene:ENSOMYG00000021029	51033
1	22623001..22623200		6	1	13	2.16667	8	0.615385	1	12	2	1	0.0833333	0.00790954	gene:ENSOMYG00000021023	40693	gene:ENSOMYG00000021029	16033
1	22629201..22629400		22	1	32	1.45455	32	1	1	38	1.72727	25	0.657895	0.000114081	gene:ENSOMYG00000021023	46893	gene:ENSOMYG00000021029	9833
1	22669401..22669600		11	1	24	2.18182	20	0.833333	1	11	1	4	0.363636	0.00924196	gene:ENSOMYG00000021029	28692	gene:ENSOMYG00000021108	0	transcript:ENSOMYT00000050581, transcript:ENSOMYT00000050638, transcript:ENSOMYT00000050585, transcript:ENSOMYT00000050623, transcript:ENSOMYT00000050567, transcript:ENSOMYT00000050625
1	22701801..22702000		9	1	20	2.22222	19	0.95	1	10	1.11111	4	0.4	0.00212202	gene:ENSOMYG00000021108	27289	gene:ENSOMYG00000021242	11394
1	22741401..22741600		8	1	17	2.125	11	0.647059	1	8	1	0	0	0.00277651	gene:ENSOMYG00000021242	0	gene:ENSOMYG00000021264	98152	transcript:ENSOMYT00000050652
1	22799401..22799600		14	1	25	1.78571	20	0.8	1	58	4.14286	19	0.327586	7.76501e-05	gene:ENSOMYG00000021242	0	gene:ENSOMYG00000021264	40152	transcript:ENSOMYT00000050652
1	22800001..22800200		7	1	23	3.28571	23	1	1	20	2.85714	14	0.7	0.00635779	gene:ENSOMYG00000021242	0	gene:ENSOMYG00000021264	39552	transcript:ENSOMYT00000050652
1	22902801..22903000		15	1	17	1.13333	17	1	1	22	1.46667	14	0.636364	0.00519751	gene:ENSOMYG00000021264	36930	gene:ENSOMYG00000021312	47100
1	22908401..22908600		11	1	10	0.909091	10	1	1	13	1.18182	6	0.461538	0.0069996	gene:ENSOMYG00000021264	42530	gene:ENSOMYG00000021312	41500
1	22984201..22984400		10	1	16	1.6	15	0.9375	1	18	1.8	9	0.5	0.00626622	gene:ENSOMYG00000021312	32222	ntrk3a	340016
1	23069601..23069800		10	1	6	0.6	6	1	1	23	2.3	5	0.217391	0.000972591	gene:ENSOMYG00000021312	117622	ntrk3a	254616
1	23075001..23075200		7	1	7	1	6	0.857143	1	10	1.42857	1	0.1	0.00365076	gene:ENSOMYG00000021312	123022	ntrk3a	249216
1	23109401..23109600		4	1	10	2.5	9	0.9	1	14	3.5	3	0.214286	0.00137973	gene:ENSOMYG00000021312	157422	ntrk3a	214816
1	23126401..23126600		36	1	72	2	71	0.986111	1	66	1.83333	56	0.848485	0.00282738	gene:ENSOMYG00000021312	174422	ntrk3a	197816
1	23153601..23153800		19	1	29	1.52632	28	0.965517	1	15	0.789474	9	0.6	0.00395558	gene:ENSOMYG00000021312	201622	ntrk3a	170616
1	23236001..23236200		11	1	25	2.27273	22	0.88	1	8	0.727273	3	0.375	0.00989624	gene:ENSOMYG00000021312	284022	ntrk3a	88216
1	23256201..23256400		7	1	15	2.14286	15	1	1	5	0.714286	2	0.4	0.00877193	gene:ENSOMYG00000021312	304222	ntrk3a	68016
1	23270201..23270400		26	1	93	3.57692	81	0.870968	1	61	2.34615	39	0.639344	0.000772783	gene:ENSOMYG00000021312	318222	ntrk3a	54016
1	23313601..23313800		8	1	23	2.875	21	0.913043	1	23	2.875	13	0.565217	0.00827277	gene:ENSOMYG00000021312	361622	ntrk3a	10616
1	23377001..23377200		11	1	12	1.09091	11	0.916667	1	6	0.545455	1	0.166667	0.00393234	gene:ENSOMYG00000021312	425022	ntrk3a	0	ntrk3a-202, ntrk3a-201, ntrk3a-205, ntrk3a-204, ntrk3a-203, ntrk3a-206
1	23472601..23472800		7	1	14	2	14	1	1	12	1.71429	6	0.5	0.00401338	gene:ENSOMYG00000021312	520622	ntrk3a	0	ntrk3a-202, ntrk3a-201, ntrk3a-205, ntrk3a-204, ntrk3a-203, ntrk3a-206
1	23495601..23495800		23	1	283	12.3043	247	0.872792	1	369	16.0435	291	0.788618	0.00317489	gene:ENSOMYG00000021312	543622	ntrk3a	0	ntrk3a-202, ntrk3a-201, ntrk3a-205, ntrk3a-204, ntrk3a-203, ntrk3a-206
1	23532001..23532200		14	1	15	1.07143	15	1	1	17	1.21429	10	0.588235	0.00577802	gene:ENSOMYG00000021312	580022	ntrk3a	0	ntrk3a-202, ntrk3a-201, ntrk3a-205, ntrk3a-204, ntrk3a-203, ntrk3a-206
1	23588201..23588400		4	1	9	2.25	7	0.777778	1	6	1.5	0	0	0.00559441	gene:ENSOMYG00000021312	636222	ntrk3a	0	ntrk3a-202, ntrk3a-201, ntrk3a-205, ntrk3a-204, ntrk3a-203, ntrk3a-206
1	23683401..23683600		24	1	58	2.41667	57	0.982759	1	43	1.79167	34	0.790698	0.0018022	gene:ENSOMYG00000070361	59076	det1	85692
1	23778201..23778400		25	1	27	1.08	27	1	1	23	0.92	17	0.73913	0.00635258	det1	3257	map1lc3b	26217
1	23778401..23778600		24	1	16	0.666667	16	1	1	24	1	9	0.375	3.25045e-05	det1	3457	map1lc3b	26017
1	23787801..23788000		12	1	27	2.25	9	0.333333	1	26	2.16667	1	0.0384615	0.00668204	det1	12857	map1lc3b	16617
1	23798201..23798400		13	1	33	2.53846	31	0.939394	1	23	1.76923	7	0.304348	6.25484e-07	det1	23257	map1lc3b	6217
1	23805601..23805800		8	1	9	1.125	7	0.777778	1	14	1.75	0	0	0.000146845	map1lc3b	0	ZCCHC14	18636	map1lc3b-201
1	23832801..23833000		12	1	17	1.41667	17	1	1	18	1.5	10	0.555556	0.00185921	map1lc3b	11002	ZCCHC14	0	ZCCHC14-201, transcript:ENSOMYT00000051417
1	23850601..23850800		5	1	12	2.4	7	0.583333	1	9	1.8	0	0	0.00681115	ZCCHC14	16365	gene:ENSOMYG00000021572	0	transcript:ENSOMYT00000051417, transcript:ENSOMYT00000051443
1	23870001..23870200		14	1	34	2.42857	32	0.941176	1	26	1.85714	16	0.615385	0.00232409	gene:ENSOMYG00000072661	27096	jph3b	3830
1	23882601..23882800		4	1	3	0.75	3	1	1	8	2	0	0	0.00606061	jph3b	0	gene:ENSOMYG00000021590	58391	jph3b-202, jph3b-201
1	23972601..23972800		12	1	25	2.08333	25	1	1	14	1.16667	9	0.642857	0.00347716	gene:ENSOMYG00000021590	26818	slc7a5	10873
1	23983001..23983200		3	1	7	2.33333	7	1	1	5	1.66667	0	0	0.00126263	gene:ENSOMYG00000021590	37218	slc7a5	473
1	23995201..23995400		8	1	13	1.625	13	1	1	4	0.5	1	0.25	0.00588235	gene:ENSOMYG00000021590	49418	slc7a5	0	slc7a5-202, slc7a5-203, slc7a5-204, slc7a5-201
1	23995601..23995800		18	1	43	2.38889	29	0.674419	1	10	0.555556	2	0.2	0.00844961	gene:ENSOMYG00000021590	49818	slc7a5	0	slc7a5-202, slc7a5-203, slc7a5-204, slc7a5-201
1	24006001..24006200		14	1	22	1.57143	22	1	1	36	2.57143	25	0.694444	0.00263867	gene:ENSOMYG00000021590	60218	slc7a5	0	slc7a5-202, slc7a5-203, slc7a5-204, slc7a5-201
1	24017001..24017200		16	1	35	2.1875	29	0.828571	1	21	1.3125	10	0.47619	0.00693265	slc7a5	1178	gene:ENSOMYG00000022405	19156
1	24020401..24020600		8	1	32	4	11	0.34375	1	14	1.75	0	0	0.00967143	slc7a5	4578	gene:ENSOMYG00000022405	15756
1	24045801..24046000		11	1	12	1.09091	11	0.916667	1	5	0.454545	0	0	0.000969619	slc7a5	29978	gene:ENSOMYG00000022405	0	transcript:ENSOMYT00000053587, transcript:ENSOMYT00000053598
1	24055001..24055200		14	1	35	2.5	35	1	1	34	2.42857	27	0.794118	0.00498622	gene:ENSOMYG00000022405	5792	gene:ENSOMYG00000022853	0	transcript:ENSOMYT00000117102, transcript:ENSOMYT00000060556, transcript:ENSOMYT00000060735, transcript:ENSOMYT00000060099, transcript:ENSOMYT00000060480, transcript:ENSOMYT00000060323, transcript:ENSOMYT00000060781
1	24251401..24251600		12	1	19	1.58333	19	1	1	23	1.91667	16	0.695652	0.00908718	ano10b	30113	snrkb	0	snrkb-201, transcript:ENSOMYT00000166084
1	24317201..24317400		5	1	9	1.8	9	1	1	3	0.6	0	0	0.00454545	gene:ENSOMYG00000063978	65226	znrf1	0	znrf1-201
1	24461601..24461800		9	1	29	3.22222	23	0.793103	1	5	0.555556	0	0	0.00166034	smpd3	0	ccl4	42837	smpd3-201
1	24541001..24541200		16	1	11	0.6875	9	0.818182	1	25	1.5625	5	0.2	0.000806997	septin15	0	gene:ENSOMYG00000030045	11591	septin15-202, septin15-201, septin15-203, septin15-204, septin15-205, septin15-206, septin15-207, septin15-208, septin15-209, septin15-210
1	24620801..24621000		23	1	45	1.95652	26	0.577778	1	34	1.47826	0	0	4.69898e-09	polr2c	5089	wwp2	16523
1	24704401..24704600		15	1	8	0.533333	8	1	1	23	1.53333	11	0.478261	0.00958102	gene:ENSOMYG00000066139	33689	gbrl2	0	gbrl2-201, gbrl2-202, transcript:ENSOMYT00000127911
1	24711401..24711600		14	1	11	0.785714	4	0.363636	1	24	1.71429	0	0	0.00630252	gene:ENSOMYG00000066139	40689	gbrl2	0	gbrl2-202
1	24728801..24729000		18	1	27	1.5	6	0.222222	1	42	2.33333	0	0	0.00246927	tmem231	12727	chst6	16969
1	24738401..24738600		10	1	15	1.5	15	1	1	5	0.5	2	0.4	0.00877193	tmem231	22327	chst6	7369
1	24752401..24752600		22	1	43	1.95455	21	0.488372	1	23	1.04545	1	0.0434783	0.000138592	chst6	5234	spire2	338
1	24913801..24914000		10	1	5	0.5	4	0.8	1	20	2	0	0	0.000395257	pdf	1370	gene:ENSOMYG00000034038	2115
1	24960001..24960200		10	1	32	3.2	30	0.9375	1	34	3.4	18	0.529412	0.000170835	zgc:56622	11054	gene:ENSOMYG00000060326	1233
1	25034401..25034600		18	1	43	2.38889	38	0.883721	1	30	1.66667	17	0.566667	0.00245997	plcg2	0	gene:ENSOMYG00000035732	10616	plcg2-201, plcg2-203, plcg2-202, plcg2-207, plcg2-206, plcg2-205, plcg2-204
1	25039401..25039600		20	1	75	3.75	61	0.813333	1	50	2.5	26	0.52	0.000514925	plcg2	0	gene:ENSOMYG00000035732	5616	plcg2-201, plcg2-203, plcg2-202, plcg2-207, plcg2-206, plcg2-205, plcg2-204
1	25046201..25046400		12	1	22	1.83333	22	1	1	9	0.75	5	0.555556	0.00400445	plcg2	5995	gene:ENSOMYG00000035732	0	transcript:ENSOMYT00000133926, transcript:ENSOMYT00000084529, transcript:ENSOMYT00000084511, transcript:ENSOMYT00000084503
1	25047001..25047200		20	1	47	2.35	47	1	1	40	2	33	0.825	0.00319056	plcg2	6795	gene:ENSOMYG00000035732	0	transcript:ENSOMYT00000133926, transcript:ENSOMYT00000084529, transcript:ENSOMYT00000084511, transcript:ENSOMYT00000084503
1	25060601..25060800		5	1	15	3	15	1	1	8	1.6	3	0.375	0.00166424	plcg2	20395	gene:ENSOMYG00000035732	0	transcript:ENSOMYT00000133926, transcript:ENSOMYT00000084529, transcript:ENSOMYT00000084511, transcript:ENSOMYT00000084503
1	25082201..25082400		14	1	5	0.357143	3	0.6	1	21	1.5	0	0	0.00384615	plcg2	41995	gene:ENSOMYG00000035732	0	transcript:ENSOMYT00000133926, transcript:ENSOMYT00000084529, transcript:ENSOMYT00000084511, transcript:ENSOMYT00000084503
1	25186401..25186600		10	1	33	3.3	28	0.848485	1	9	0.9	3	0.333333	0.00501312	gene:ENSOMYG00000070951	0	zfpm1	2575	transcript:ENSOMYT00000144936
1	25296201..25296400		16	1	26	1.625	19	0.730769	1	13	0.8125	3	0.230769	0.00405634	zfpm1	10251	trhr2	76122
1	25298001..25298200		8	1	20	2.5	13	0.65	1	6	0.75	0	0	0.00745342	zfpm1	12051	trhr2	74322
1	25478601..25478800		20	1	69	3.45	25	0.362319	1	13	0.65	0	0	0.00548813	UTP4	5404	wfdc1	0	wfdc1-201
1	25545401..25545600		14	1	16	1.14286	15	0.9375	1	21	1.5	11	0.52381	0.00701313	wfdc1	59765	kcng4a	0	kcng4a-201
1	25781401..25781600		10	1	14	1.4	13	0.928571	1	5	0.5	0	0	0.000515996	mlycd	0	gene:ENSOMYG00000012199	115719	mlycd-201
1	25836201..25836400		11	1	18	1.63636	18	1	1	8	0.727273	4	0.5	0.00468227	mlycd	47198	gene:ENSOMYG00000012199	60919
1	25848601..25848800		15	1	32	2.13333	16	0.5	1	33	2.2	5	0.151515	0.00277584	mlycd	59598	gene:ENSOMYG00000012199	48519
1	25873001..25873200		12	1	27	2.25	24	0.888889	1	14	1.16667	7	0.5	0.00994355	mlycd	83998	gene:ENSOMYG00000012199	24119
1	25888001..25888200		14	1	24	1.71429	24	1	1	7	0.5	4	0.571429	0.00778643	mlycd	98998	gene:ENSOMYG00000012199	9119
1	25939601..25939800		10	1	17	1.7	15	0.882353	1	4	0.4	0	0	0.00250627	mlycd	150598	gene:ENSOMYG00000012199	0	transcript:ENSOMYT00000028341, transcript:ENSOMYT00000028352, transcript:ENSOMYT00000028378, transcript:ENSOMYT00000028391
1	26017601..26017800		13	1	46	3.53846	33	0.717391	1	36	2.76923	15	0.416667	0.00579014	mlycd	228598	gene:ENSOMYG00000012199	0	transcript:ENSOMYT00000028341, transcript:ENSOMYT00000028352, transcript:ENSOMYT00000028378, transcript:ENSOMYT00000028391
1	26080201..26080400		17	1	108	6.35294	107	0.990741	1	148	8.70588	132	0.891892	0.000888925	mlycd	291198	gene:ENSOMYG00000012199	0	transcript:ENSOMYT00000028341, transcript:ENSOMYT00000028352, transcript:ENSOMYT00000028378, transcript:ENSOMYT00000028391
1	26118201..26118400		6	1	14	2.33333	14	1	1	14	2.33333	7	0.5	0.00289855	mlycd	329198	gene:ENSOMYG00000012199	0	transcript:ENSOMYT00000028341, transcript:ENSOMYT00000028352, transcript:ENSOMYT00000028378, transcript:ENSOMYT00000028391
1	26129601..26129800		10	1	7	0.7	7	1	1	17	1.7	7	0.411765	0.00991609	mlycd	340598	gene:ENSOMYG00000012199	0	transcript:ENSOMYT00000028341, transcript:ENSOMYT00000028352, transcript:ENSOMYT00000028378, transcript:ENSOMYT00000028391
1	26178401..26178600		4	1	5	1.25	5	1	1	4	1	0	0	0.00793651	mlycd	389398	gene:ENSOMYG00000012199	0	transcript:ENSOMYT00000028341, transcript:ENSOMYT00000028352, transcript:ENSOMYT00000028378, transcript:ENSOMYT00000028391
1	26189401..26189600		5	1	14	2.8	14	1	1	13	2.6	7	0.538462	0.0057971	mlycd	400398	gene:ENSOMYG00000012199	0	transcript:ENSOMYT00000028341, transcript:ENSOMYT00000028352, transcript:ENSOMYT00000028378, transcript:ENSOMYT00000028391
1	26193601..26193800		9	1	24	2.66667	23	0.958333	1	22	2.44444	14	0.636364	0.00741743	mlycd	404598	gene:ENSOMYG00000012199	0	transcript:ENSOMYT00000028341, transcript:ENSOMYT00000028352, transcript:ENSOMYT00000028378, transcript:ENSOMYT00000028391
1	26350201..26350400		7	1	11	1.57143	10	0.909091	1	10	1.42857	3	0.3	0.00670795	mlycd	561198	gene:ENSOMYG00000012199	0	transcript:ENSOMYT00000028341, transcript:ENSOMYT00000028352
1	26416001..26416200		8	1	24	3	21	0.875	1	23	2.875	6	0.26087	2.1902e-05	mlycd	626998	gene:ENSOMYG00000012199	0	transcript:ENSOMYT00000028341, transcript:ENSOMYT00000028352
1	26485801..26486000		12	1	61	5.08333	56	0.918033	1	18	1.5	11	0.611111	0.00417876	mlycd	696798	gene:ENSOMYG00000012199	0	transcript:ENSOMYT00000028341, transcript:ENSOMYT00000028352
1	26555801..26556000		19	1	12	0.631579	11	0.916667	1	34	1.78947	16	0.470588	0.00681315	gene:ENSOMYG00000012199	54435	si:ch211-216l23.2	124413
1	26704601..26704800		18	1	42	2.33333	23	0.547619	1	33	1.83333	5	0.151515	0.000387722	si:ch211-216l23.2	10275	znf423	9870
1	26708801..26709000		11	1	27	2.45455	25	0.925926	1	6	0.545455	2	0.333333	0.00490083	si:ch211-216l23.2	14475	znf423	5670
1	26727201..26727400		8	1	24	3	22	0.916667	1	24	3	14	0.583333	0.00866845	znf423	0	gene:ENSOMYG00000075868	25722	znf423-202, znf423-203, znf423-201
1	26759601..26759800		11	1	18	1.63636	13	0.722222	1	12	1.09091	2	0.166667	0.00388753	gene:ENSOMYG00000075868	5137	si:ch211-212o1.2	126833	znf423-202, znf423-203, znf423-201, znf423-204, znf423-205, znf423-206
1	26868601..26868800		20	1	45	2.25	24	0.533333	1	63	3.15	16	0.253968	0.00287538	gene:ENSOMYG00000075868	114137	si:ch211-212o1.2	17833
1	26884801..26885000		11	1	26	2.36364	22	0.846154	1	35	3.18182	18	0.514286	0.00665559	gene:ENSOMYG00000075868	130337	si:ch211-212o1.2	1633
1	27036001..27036200		7	1	20	2.85714	12	0.6	1	7	1	0	0	0.00724638	cbln1	85374	n4bp1	86396
1	27105201..27105400		6	1	23	3.83333	14	0.608696	1	7	1.16667	0	0	0.00561941	cbln1	154574	n4bp1	17196
1	27134401..27134600		8	1	8	1	6	0.75	1	17	2.125	0	0	0.000158103	n4bp1	0	siah1	27023	n4bp1-202, n4bp1-201
1	27142801..27143000		10	1	20	2	19	0.95	1	10	1	5	0.5	0.00884173	n4bp1	7778	siah1	18623
1	27151201..27151400		9	1	15	1.66667	14	0.933333	1	15	1.66667	6	0.4	0.0025987	n4bp1	16178	siah1	10223
1	27162601..27162800		6	1	21	3.5	15	0.714286	1	12	2	2	0.166667	0.00328384	siah1	0	il34	45217	siah1-201
1	27234001..27234200		27	1	34	1.25926	31	0.911765	1	5	0.185185	1	0.2	0.00198174	il34	20464	st3gal2	63810
1	27269601..27269800		18	1	53	2.94444	53	1	1	27	1.5	22	0.814815	0.00335815	il34	56064	st3gal2	28210
1	27305201..27305400		4	1	17	4.25	15	0.882353	1	14	3.5	6	0.428571	0.00999823	st3gal2	0	gene:ENSOMYG00000052360	7835	st3gal2-201, st3gal2-202, st3gal2-203
1	27352601..27352800		6	1	9	1.5	8	0.888889	1	7	1.16667	1	0.142857	0.00559441	gene:ENSOMYG00000012899	10445	pllp	8921
1	27393001..27393200		16	1	32	2	10	0.3125	1	25	1.5625	1	0.04	0.00944034	PSME3IP1	0	cpne2	12168	PSME3IP1-201
1	27409001..27409200		26	1	33	1.26923	31	0.939394	1	56	2.15385	39	0.696429	0.00522322	PSME3IP1	4257	cpne2	0	cpne2-201, cpne2-210, cpne2-209, cpne2-208, cpne2-207, cpne2-205, cpne2-204, cpne2-202, cpne2-206, cpne2-203
1	27465401..27465600		6	1	19	3.16667	17	0.894737	1	14	2.33333	5	0.357143	0.00186903	cpne2	22234	gene:ENSOMYG00000057086	17675
1	27511201..27511400		2	1	7	3.5	7	1	1	3	1.5	0	0	0.00833333	herpud1	13380	nup93	0	nup93-201, nup93-203, nup93-202, nup93-204
1	27535001..27535200		4	1	9	2.25	9	1	1	5	1.25	1	0.2	0.004995	nup93	847	mta	16248
1	27560801..27561000		20	1	170	8.5	133	0.782353	1	149	7.45	98	0.657718	0.00915381	bbs2	933	B3GNT9	1368
1	27604401..27604600		14	1	26	1.85714	22	0.846154	1	29	2.07143	14	0.482759	0.00482484	phaf1	30147	cbfb	0	cbfb-202, cbfb-201, cbfb-203
1	27643401..27643600		6	1	12	2	12	1	1	5	0.833333	0	0	0.000161603	cbfb	33680	gnao1a	0	gnao1a-201, gnao1a-203, gnao1a-202
1	27682001..27682200		6	1	8	1.33333	5	0.625	1	15	2.5	0	0	0.00166424	cbfb	72280	gnao1a	0	gnao1a-201, gnao1a-203, gnao1a-202, gnao1a-204
1	27705801..27706000		16	1	26	1.625	23	0.884615	1	5	0.3125	1	0.2	0.00506736	cbfb	96080	gnao1a	0	gnao1a-201, gnao1a-203, gnao1a-202, gnao1a-204
1	27784801..27785000		18	1	13	0.722222	13	1	1	41	2.27778	24	0.585366	0.00321471	gene:ENSOMYG00000059726	91982	hsf4	31605
1	27834801..27835000		23	1	33	1.43478	18	0.545455	1	49	2.13043	6	0.122449	4.96796e-05	nudt21	0	gene:ENSOMYG00000054557	9405	nudt21-203, nudt21-201, nudt21-202
1	27907001..27907200		12	1	24	2	24	1	1	34	2.83333	23	0.676471	0.00125651	gene:ENSOMYG00000054557	61572	bcar1	0	bcar1-202, bcar1-201
1	27956801..27957000		24	1	69	2.875	64	0.927536	1	18	0.75	11	0.611111	0.0022447	gene:ENSOMYG00000054557	111372	bcar1	0	bcar1-202, bcar1-201
1	27967001..27967200		8	1	12	1.5	12	1	1	16	2	4	0.25	5.98256e-05	gene:ENSOMYG00000054557	121572	bcar1	0	bcar1-202, bcar1-201
1	27991601..27991800		16	1	43	2.6875	14	0.325581	1	30	1.875	2	0.0666667	0.00738008	bcar1	13443	cfdp1	0	cfdp1-201
1	28010001..28010200		14	1	27	1.92857	21	0.777778	1	13	0.928571	4	0.307692	0.00587051	bcar1	31843	cfdp1	0	cfdp1-201
1	28091801..28092000		9	1	17	1.88889	13	0.764706	1	18	2	5	0.277778	0.00497761	tmem170a	55692	ctcf	6875
1	28184001..28184200		12	1	24	2	21	0.875	1	18	1.5	7	0.388889	0.00131941	ripor1	38251	gene:ENSOMYG00000017264	40659
1	28263201..28263400		10	1	25	2.5	24	0.96	1	23	2.3	15	0.652174	0.00779619	pard6a	0	gene:ENSOMYG00000059097	15347	pard6a-201
1	28273001..28273200		12	1	17	1.41667	17	1	1	4	0.333333	1	0.25	0.00300752	pard6a	0	gene:ENSOMYG00000059097	5547	pard6a-201
1	28305001..28305200		8	1	19	2.375	19	1	1	12	1.5	7	0.583333	0.00466126	gene:ENSOMYG00000059097	24051	ranbp10	0	ranbp10-205, ranbp10-204, ranbp10-203, ranbp10-202, ranbp10-201
1	28309401..28309600		16	1	17	1.0625	17	1	1	8	0.5	4	0.5	0.0055336	gene:ENSOMYG00000059097	28451	ranbp10	0	ranbp10-205, ranbp10-204, ranbp10-203, ranbp10-202, ranbp10-201
1	28332001..28332200		10	1	11	1.1	10	0.909091	1	12	1.2	3	0.25	0.00217295	ranbp10	1063	tsnaxip1	0	tsnaxip1-201
1	28434801..28435000		6	1	6	1	6	1	1	8	1.33333	2	0.25	0.00932401	nrn1la	0	pskh1	48098	nrn1la-201
1	28500801..28501000		20	1	29	1.45	8	0.275862	1	48	2.4	1	0.0208333	0.00133917	pskh1	8519	mbtps1	2410
1	28528601..28528800		9	1	10	1.11111	10	1	1	7	0.777778	2	0.285714	0.00339367	mbtps1	557	slc38a8a	2044
1	28713601..28713800		17	1	36	2.11765	30	0.833333	1	65	3.82353	32	0.492308	0.000579421	gene:ENSOMYG00000024924	166970	pnp6	24578
1	28823401..28823600		20	1	28	1.4	25	0.892857	1	36	1.8	21	0.583333	0.00590074	got2a	45244	chka	0	chka-201, chka-202, chka-203, chka-207, chka-206, chka-205, chka-204
1	28845001..28845200		11	1	14	1.27273	12	0.857143	1	13	1.18182	3	0.230769	0.0015607	si:dkey-12e7.1	1248	anpeplb	287
1	28873201..28873400		7	1	16	2.28571	14	0.875	1	12	1.71429	4	0.333333	0.00479962	arpin	5226	gene:ENSOMYG00000057238	10951
1	28880801..28881000		12	1	23	1.91667	23	1	1	30	2.5	22	0.733333	0.0066036	arpin	12826	gene:ENSOMYG00000057238	3351
1	28912001..28912200		6	1	7	1.16667	4	0.571429	1	12	2	0	0	0.00902993	igf1ra	0	gene:ENSOMYG00000053818	107424	igf1ra-201, igf1ra-202, igf1ra-205, igf1ra-204, igf1ra-206, igf1ra-203
1	29033001..29033200		12	1	29	2.41667	22	0.758621	1	18	1.5	4	0.222222	0.000412867	gene:ENSOMYG00000053818	11555	gene:ENSOMYG00000030698	39167	igf1ra-201, igf1ra-202, igf1ra-205, igf1ra-204, igf1ra-206, igf1ra-203, igf1ra-207, igf1ra-208, igf1ra-209, igf1ra-210
1	29048601..29048800		10	1	31	3.1	30	0.967742	1	34	3.4	22	0.647059	0.0010917	gene:ENSOMYG00000053818	27155	gene:ENSOMYG00000030698	23567	igf1ra-201, igf1ra-202, igf1ra-205, igf1ra-204, igf1ra-206, igf1ra-203, igf1ra-207, igf1ra-208, igf1ra-209, igf1ra-210
1	29058601..29058800		8	1	11	1.375	8	0.727273	1	16	2	3	0.1875	0.00760683	gene:ENSOMYG00000053818	37155	gene:ENSOMYG00000030698	13567	igf1ra-201, igf1ra-202, igf1ra-205, igf1ra-204, igf1ra-206, igf1ra-203, igf1ra-207, igf1ra-208, igf1ra-209, igf1ra-210
1	29074201..29074400		6	1	10	1.66667	6	0.6	1	9	1.5	0	0	0.00773994	gene:ENSOMYG00000053818	52755	gene:ENSOMYG00000030698	0	transcript:ENSOMYT00000072205
1	29075201..29075400		12	1	40	3.33333	37	0.925	1	39	3.25	18	0.461538	5.789e-06	synm	0	gene:ENSOMYG00000049766	30630	synm-202, synm-201
1	29221201..29221400		8	1	18	2.25	18	1	1	6	0.75	3	0.5	0.00988142	mef2aa	0	gene:ENSOMYG00000031063	102227	mef2aa-203, mef2aa-202, mef2aa-201
1	29244001..29244200		14	1	15	1.07143	13	0.866667	1	13	0.928571	3	0.230769	0.00102601	mef2aa	0	gene:ENSOMYG00000031063	79427	mef2aa-203, mef2aa-202, mef2aa-201
1	29317801..29318000		16	1	16	1	15	0.9375	1	17	1.0625	8	0.470588	0.00441231	mef2aa	4751	gene:ENSOMYG00000031063	5627
1	29351401..29351600		4	1	8	2	8	1	1	3	0.75	0	0	0.00606061	gene:ENSOMYG00000031063	0	gene:ENSOMYG00000048101	193386	transcript:ENSOMYT00000073834, transcript:ENSOMYT00000073919, transcript:ENSOMYT00000129983, transcript:ENSOMYT00000073962, transcript:ENSOMYT00000073986
1	29490001..29490200		12	1	23	1.91667	18	0.782609	1	36	3	16	0.444444	0.00999021	gene:ENSOMYG00000031063	128295	gene:ENSOMYG00000048101	54786
1	29610801..29611000		20	1	28	1.4	27	0.964286	1	14	0.7	7	0.5	0.000839607	gene:ENSOMYG00000048101	62921	nr2f2	31063
1	29648801..29649000		8	1	8	1	8	1	1	7	0.875	1	0.142857	0.0013986	gene:ENSOMYG00000048101	100921	nr2f2	0	nr2f2-201
1	29672401..29672600		10	1	14	1.4	9	0.642857	1	14	1.4	2	0.142857	0.00915332	nr2f2	2857	lysmd4	402437
1	29728601..29728800		12	1	34	2.83333	23	0.676471	1	29	2.41667	9	0.310345	0.00384067	nr2f2	59057	lysmd4	346237
1	29768201..29768400		18	1	53	2.94444	52	0.981132	1	70	3.88889	57	0.814286	0.0028073	nr2f2	98657	lysmd4	306637
1	29905801..29906000		14	1	37	2.64286	26	0.702703	1	15	1.07143	4	0.266667	0.00495023	nr2f2	236257	lysmd4	169037
1	29915801..29916000		14	1	48	3.42857	41	0.854167	1	17	1.21429	7	0.411765	0.000853838	nr2f2	246257	lysmd4	159037
1	29978801..29979000		12	1	14	1.16667	14	1	1	8	0.666667	1	0.125	4.69087e-05	nr2f2	309257	lysmd4	96037
1	29985601..29985800		16	1	26	1.625	21	0.807692	1	34	2.125	15	0.441176	0.00403563	nr2f2	316057	lysmd4	89237
1	29997601..29997800		8	1	11	1.375	10	0.909091	1	18	2.25	5	0.277778	0.00125464	nr2f2	328057	lysmd4	77237
1	30242801..30243000		10	1	13	1.3	12	0.923077	1	17	1.7	3	0.176471	5.78658e-05	lysmd4	160046	gene:ENSOMYG00000043599	10167
1	30470201..30470400		11	1	23	2.09091	23	1	1	20	1.81818	14	0.7	0.00635779	slco3a1a	8853	gene:ENSOMYG00000075614	23435
1	30584601..30584800		18	1	31	1.72222	29	0.935484	1	38	2.11111	26	0.684211	0.0092916	gene:ENSOMYG00000040416	35297	gene:ENSOMYG00000040422	60101
1	30620001..30620200		10	1	11	1.1	9	0.818182	1	8	0.8	0	0	0.00059538	gene:ENSOMYG00000040416	70697	gene:ENSOMYG00000040422	24701
1	30695001..30695200		6	1	18	3	18	1	1	14	2.33333	9	0.642857	0.0099416	gene:ENSOMYG00000040422	46781	RORA	24145
1	30710201..30710400		10	1	49	4.9	44	0.897959	1	21	2.1	13	0.619048	0.00963296	gene:ENSOMYG00000040422	61981	RORA	8945
1	30734401..30734600		10	1	20	2	20	1	1	11	1.1	6	0.545455	0.00271907	gene:ENSOMYG00000040422	86181	RORA	0	RORA-204, RORA-203, RORA-202
1	30739201..30739400		10	1	10	1	7	0.7	1	11	1.1	0	0	0.00103199	gene:ENSOMYG00000040422	90981	RORA	0	RORA-204, RORA-203, RORA-202
1	30780601..30780800		2	1	40	20	34	0.85	1	39	19.5	18	0.461538	0.000271584	gene:ENSOMYG00000040422	132381	RORA	0	RORA-203, RORA-202
1	30832001..30832200		7	1	11	1.57143	8	0.727273	1	19	2.71429	2	0.105263	0.000974238	gene:ENSOMYG00000040422	183781	RORA	0	RORA-202
1	30834001..30834200		10	1	19	1.9	19	1	1	16	1.6	9	0.5625	0.00170124	gene:ENSOMYG00000040422	185781	RORA	0	RORA-202
1	30861201..30861400		15	1	25	1.66667	17	0.68	1	26	1.73333	7	0.269231	0.00363519	gene:ENSOMYG00000040422	212981	RORA	0	RORA-202
1	30914401..30914600		8	1	15	1.875	14	0.933333	1	10	1.25	4	0.4	0.00680258	gene:ENSOMYG00000040422	266181	RORA	0	RORA-202
1	31002601..31002800		12	1	26	2.16667	24	0.923077	1	9	0.75	3	0.333333	0.00120009	RORA	21045	gene:ENSOMYG00000052289	81748
1	31010001..31010200		8	1	17	2.125	10	0.588235	1	8	1	0	0	0.00594966	RORA	28445	gene:ENSOMYG00000052289	74348
1	31112201..31112400		28	1	74	2.64286	67	0.905405	1	32	1.14286	20	0.625	0.00107135	gene:ENSOMYG00000052289	26641	gene:ENSOMYG00000052815	90246
1	31227401..31227600		8	1	44	5.5	43	0.977273	1	86	10.75	71	0.825581	0.00868337	TLN2	0	TPM1	94626	TLN2-201, TLN2-202, TLN2-203, TLN2-207, TLN2-206, TLN2-205, TLN2-204, TLN2-208
1	31293401..31293600		8	1	10	1.25	10	1	1	8	1	2	0.25	0.0015083	TLN2	2925	TPM1	28626
1	31364201..31364400		8	1	25	3.125	24	0.96	1	3	0.375	0	0	0.001221	TPM1	21782	tmem266	9828
1	31372001..31372200		6	1	13	2.16667	6	0.461538	1	12	2	0	0	0.00968944	TPM1	29582	tmem266	2028
1	31382401..31382600		6	1	12	2	12	1	1	7	1.16667	3	0.428571	0.00902993	tmem266	0	etfa	45299	tmem266-201, tmem266-202
1	31386001..31386200		7	1	73	10.4286	71	0.972603	1	66	9.42857	55	0.833333	0.00491966	tmem266	0	etfa	41699	tmem266-201, tmem266-202
1	31478601..31478800		11	1	11	1	6	0.545455	1	16	1.45455	1	0.0625	0.00869565	isl2a	19619	scaper	0	scaper-202, scaper-201, scaper-205, scaper-204, scaper-203
1	31557001..31557200		16	1	30	1.875	25	0.833333	1	12	0.75	3	0.25	0.000628246	PSTPIP1	0	tspan3a	9855	PSTPIP1-201
1	31592401..31592600		18	1	51	2.83333	44	0.862745	1	31	1.72222	17	0.548387	0.00201252	tspan3a	9650	gene:ENSOMYG00000000220	4764
1	31729601..31729800		10	1	21	2.1	18	0.857143	1	10	1	3	0.3	0.0038163	gene:ENSOMYG00000000456	0	gene:ENSOMYG00000000534	77380	transcript:ENSOMYT00000000830, transcript:ENSOMYT00000000846, transcript:ENSOMYT00000000839
1	31765401..31765600		14	1	29	2.07143	28	0.965517	1	14	1	8	0.571429	0.00280905	gene:ENSOMYG00000000456	0	gene:ENSOMYG00000000534	41580	transcript:ENSOMYT00000000830, transcript:ENSOMYT00000000846, transcript:ENSOMYT00000000839, transcript:ENSOMYT00000000856, transcript:ENSOMYT00000000862
1	32179401..32179600		9	1	24	2.66667	22	0.916667	1	22	2.44444	9	0.409091	0.000283607	sema4ba	0	rasef2	25120	sema4ba-201, sema4ba-202, sema4ba-203
1	32204801..32205000		12	1	20	1.66667	15	0.75	1	19	1.58333	0	0	6.16686e-07	rasef2	0	gene:ENSOMYG00000002093	10497	rasef2-202, rasef2-201
1	32225401..32225600		16	1	30	1.875	12	0.4	1	47	2.9375	3	0.0638298	0.000436215	gene:ENSOMYG00000002093	8345	gene:ENSOMYG00000002057	0	transcript:ENSOMYT00000004409, transcript:ENSOMYT00000004436
1	32277601..32277800		18	1	60	3.33333	41	0.683333	1	51	2.83333	19	0.372549	0.000965564	gene:ENSOMYG00000002131	0	pex11a	48602	transcript:ENSOMYT00000004533
1	32328401..32328600		12	1	21	1.75	16	0.761905	1	12	1	1	0.0833333	0.000214409	pex11a	329	gene:ENSOMYG00000002174	14238
1	32329001..32329200		11	1	13	1.18182	9	0.692308	1	18	1.63636	2	0.111111	0.0013537	pex11a	929	gene:ENSOMYG00000002174	13638
1	32430601..32430800		15	1	13	0.866667	11	0.846154	1	27	1.8	9	0.333333	0.00286784	gene:ENSOMYG00000002439	8714	gene:ENSOMYG00000002460	6947
1	32455001..32455200		10	1	29	2.9	19	0.655172	1	15	1.5	3	0.2	0.0048625	gene:ENSOMYG00000002460	14101	gene:ENSOMYG00000002505	26663
1	32520001..32520200		14	1	47	3.35714	47	1	1	46	3.28571	37	0.804348	0.00114543	gene:ENSOMYG00000065966	25164	gene:ENSOMYG00000002638	12224
1	32520201..32520400		30	1	78	2.6	76	0.974359	1	64	2.13333	52	0.8125	0.00136386	gene:ENSOMYG00000065966	25364	gene:ENSOMYG00000002638	12024
1	32694601..32694800		4	1	7	1.75	7	1	1	10	2.5	3	0.3	0.0061703	gene:ENSOMYG00000065966	199764	gene:ENSOMYG00000002638	0	transcript:ENSOMYT00000141173
1	32840201..32840400		24	1	73	3.04167	70	0.958904	1	36	1.5	28	0.777778	0.00559967	gene:ENSOMYG00000074576	1636	elapor2a	4048
1	32866001..32866200		8	1	27	3.375	23	0.851852	1	9	1.125	3	0.333333	0.00622647	elapor2a	0	grm3	9155	elapor2a-201, elapor2a-202, elapor2a-203, elapor2a-204, elapor2a-205, elapor2a-207, elapor2a-206, elapor2a-208
1	32882801..32883000		14	1	24	1.71429	21	0.875	1	30	2.14286	14	0.466667	0.00179428	elapor2a	15811	grm3	0	grm3-201, grm3-202
1	32985401..32985600		8	1	21	2.625	20	0.952381	1	11	1.375	5	0.454545	0.00298052	gene:ENSOMYG00000075866	3304	sema3d	50925
1	33030201..33030400		20	1	40	2	30	0.75	1	17	0.85	5	0.294118	0.00170548	gene:ENSOMYG00000075866	48104	sema3d	6125
1	33051201..33051400		6	1	9	1.5	9	1	1	7	1.16667	1	0.142857	0.000874126	sema3d	0	sema3ab	165462	sema3d-201
1	33190401..33190600		14	1	21	1.5	17	0.809524	1	8	0.571429	0	0	0.000115327	sema3d	82052	sema3ab	26262
1	33244401..33244600		19	1	37	1.94737	34	0.918919	1	20	1.05263	12	0.6	0.00594904	sema3ab	0	sema3e	24975	sema3ab-203, sema3ab-205, sema3ab-204, sema3ab-202, sema3ab-201, sema3ab-206, sema3ab-207, sema3ab-208, sema3ab-209, sema3ab-210
1	33432401..33432600		20	1	33	1.65	33	1	1	39	1.95	31	0.794872	0.00514025	gene:ENSOMYG00000073346	23029	CACNA2D1	70025	PCLO-201, PCLO-202, PCLO-203, PCLO-204, PCLO-207, PCLO-206, PCLO-208, PCLO-205, PCLO-209
1	33535201..33535400		15	1	14	0.933333	12	0.857143	1	10	0.666667	0	0	3.36519e-05	CACNA2D1	0	HGF	87651	CACNA2D1-201, CACNA2D1-204, CACNA2D1-202, CACNA2D1-203
1	33688601..33688800		14	1	36	2.57143	29	0.805556	1	33	2.35714	15	0.454545	0.00252791	HGF	42002	lrrc4.2	37343
1	33699201..33699400		10	1	20	2	17	0.85	1	7	0.7	1	0.142857	0.00174318	HGF	52602	lrrc4.2	26743
1	33717201..33717400		19	1	52	2.73684	49	0.942308	1	49	2.57895	35	0.714286	0.00215018	HGF	70602	lrrc4.2	8743
1	33754401..33754600		6	1	14	2.33333	9	0.642857	1	7	1.16667	0	0	0.00681115	lrrc4.2	26193	gene:ENSOMYG00000009539	167855
1	33819001..33819200		26	1	31	1.19231	30	0.967742	1	32	1.23077	23	0.71875	0.00730817	lrrc4.2	90793	gene:ENSOMYG00000009539	103255
1	33824601..33824800		8	1	17	2.125	16	0.941176	1	9	1.125	4	0.444444	0.00966859	lrrc4.2	96393	gene:ENSOMYG00000009539	97655
1	33825001..33825200		9	1	12	1.33333	11	0.916667	1	17	1.88889	4	0.235294	0.000377004	lrrc4.2	96793	gene:ENSOMYG00000009539	97255
1	33842401..33842600		10	1	22	2.2	21	0.954545	1	29	2.9	19	0.655172	0.00997895	lrrc4.2	114193	gene:ENSOMYG00000009539	79855
1	33865801..33866000		15	1	8	0.533333	8	1	1	19	1.26667	8	0.421053	0.0057971	lrrc4.2	137593	gene:ENSOMYG00000009539	56455
1	33886001..33886200		10	1	18	1.8	15	0.833333	1	13	1.3	1	0.0769231	3.58055e-05	lrrc4.2	157793	gene:ENSOMYG00000009539	36255
1	33941801..33942000		26	1	22	0.846154	21	0.954545	1	45	1.73077	30	0.666667	0.00732675	gene:ENSOMYG00000009539	18653	gene:ENSOMYG00000009553	5998
1	33964801..33965000		16	1	56	3.5	26	0.464286	1	43	2.6875	8	0.186047	0.00327807	gene:ENSOMYG00000009564	1983	gene:ENSOMYG00000009600	1605
1	33965201..33965400		15	1	22	1.46667	11	0.5	1	13	0.866667	0	0	0.00169077	gene:ENSOMYG00000009564	2383	gene:ENSOMYG00000009600	1205
1	33965401..33965600		12	1	30	2.5	21	0.7	1	6	0.5	0	0	0.00256958	gene:ENSOMYG00000009564	2583	gene:ENSOMYG00000009600	1005
1	33985201..33985400		10	1	26	2.6	20	0.769231	1	12	1.2	3	0.25	0.00356622	gene:ENSOMYG00000009600	8778	IMPDH1	0	IMPDH1-201
1	34095601..34095800		22	1	66	3	65	0.984848	1	18	0.818182	14	0.777778	0.00681938	gene:ENSOMYG00000048372	6148	gene:ENSOMYG00000058158	18913
1	34109801..34110000		36	1	31	0.861111	28	0.903226	1	71	1.97222	46	0.647887	0.00565863	gene:ENSOMYG00000048372	20348	gene:ENSOMYG00000058158	4713
1	34127201..34127400		10	1	8	0.8	8	1	1	5	0.5	1	0.2	0.00699301	gene:ENSOMYG00000058158	9187	gene:ENSOMYG00000011903	40481
1	34154401..34154600		8	1	12	1.5	11	0.916667	1	7	0.875	2	0.285714	0.00954592	gene:ENSOMYG00000058158	36387	gene:ENSOMYG00000011903	13281
1	34154801..34155000		11	1	17	1.54545	17	1	1	12	1.09091	3	0.25	2.1967e-05	gene:ENSOMYG00000058158	36787	gene:ENSOMYG00000011903	12881
1	34174001..34174200		10	1	29	2.9	28	0.965517	1	27	2.7	19	0.703704	0.00911685	gene:ENSOMYG00000011903	0	gene:ENSOMYG00000012117	28011	transcript:ENSOMYT00000027901, transcript:ENSOMYT00000027921, transcript:ENSOMYT00000027839
1	34207201..34207400		28	1	50	1.78571	41	0.82	1	30	1.07143	12	0.4	0.000162126	gene:ENSOMYG00000011903	6133	gene:ENSOMYG00000012117	0	transcript:ENSOMYT00000028200, transcript:ENSOMYT00000028216
1	34244601..34244800		25	1	54	2.16	9	0.166667	1	36	1.44	0	0	0.00752979	gene:ENSOMYG00000012117	13840	gene:ENSOMYG00000012208	0	transcript:ENSOMYT00000028230
1	34247201..34247400		7	1	7	1	7	1	1	7	1	1	0.142857	0.002331	gene:ENSOMYG00000012208	1728	wash1	12262
1	34285401..34285600		6	1	18	3	16	0.888889	1	7	1.16667	2	0.285714	0.0069482	gene:ENSOMYG00000063470	5919	fkbp4	22983	wash1-201, wash1-202
1	34302201..34302400		6	1	2	0.333333	2	1	1	13	2.16667	0	0	0.00952381	gene:ENSOMYG00000063470	22719	fkbp4	6183
1	34343601..34343800		14	1	29	2.07143	24	0.827586	1	9	0.642857	0	0	1.22813e-05	gene:ENSOMYG00000012703	0	gene:ENSOMYG00000073130	7125	transcript:ENSOMYT00000031142, transcript:ENSOMYT00000031205, transcript:ENSOMYT00000031217, transcript:ENSOMYT00000031233, transcript:ENSOMYT00000031223, transcript:ENSOMYT00000031236
1	34394201..34394400		8	1	11	1.375	11	1	1	8	1	3	0.375	0.00481596	c2cd5	0	gene:ENSOMYG00000055417	37350	c2cd5-210, c2cd5-208, c2cd5-207, c2cd5-205, c2cd5-206, c2cd5-209, c2cd5-204, c2cd5-203, c2cd5-202, c2cd5-201
1	34395401..34395600		10	1	29	2.9	29	1	1	10	1	6	0.6	0.00255316	c2cd5	0	gene:ENSOMYG00000055417	36150	c2cd5-210, c2cd5-208, c2cd5-207, c2cd5-205, c2cd5-206, c2cd5-209, c2cd5-204, c2cd5-203, c2cd5-202, c2cd5-201
1	34447601..34447800		11	1	16	1.45455	15	0.9375	1	6	0.545455	2	0.333333	0.00934154	gene:ENSOMYG00000055417	13645	gene:ENSOMYG00000013719	12189
1	34484601..34484800		14	1	40	2.85714	38	0.95	1	9	0.642857	4	0.444444	0.00118365	gene:ENSOMYG00000055417	50645	gene:ENSOMYG00000013719	0	transcript:ENSOMYT00000031953, transcript:ENSOMYT00000032044, transcript:ENSOMYT00000032072, transcript:ENSOMYT00000032128, transcript:ENSOMYT00000032147, transcript:ENSOMYT00000032139
1	34485201..34485400		8	1	16	2	15	0.9375	1	16	2	8	0.5	0.00774935	gene:ENSOMYG00000055417	51245	gene:ENSOMYG00000013719	0	transcript:ENSOMYT00000031953, transcript:ENSOMYT00000032044, transcript:ENSOMYT00000032072, transcript:ENSOMYT00000032128, transcript:ENSOMYT00000032147, transcript:ENSOMYT00000032139
1	34506601..34506800		18	1	32	1.77778	32	1	1	66	3.66667	54	0.818182	0.00606023	gene:ENSOMYG00000013817	0	gene:ENSOMYG00000013851	35194	transcript:ENSOMYT00000032237
1	34513001..34513200		21	1	29	1.38095	27	0.931034	1	27	1.28571	17	0.62963	0.00684228	gene:ENSOMYG00000013817	6196	gene:ENSOMYG00000013851	28794
1	34587401..34587600		8	1	15	1.875	15	1	1	7	0.875	1	0.142857	9.38174e-05	gene:ENSOMYG00000013961	447	gene:ENSOMYG00000060654	34746
1	34587601..34587800		10	1	14	1.4	14	1	1	10	1	4	0.4	0.00156022	gene:ENSOMYG00000013961	647	gene:ENSOMYG00000060654	34546
1	34740601..34740800		18	1	28	1.55556	25	0.892857	1	43	2.38889	24	0.55814	0.00242456	zp2.3	49641	MAPK8IP2	23600
1	34806801..34807000		16	1	32	2	7	0.21875	1	37	2.3125	0	0	0.00311972	MAPK8IP2	5125	gene:ENSOMYG00000076455	192046
1	34824601..34824800		8	1	12	1.5	11	0.916667	1	11	1.375	4	0.363636	0.00841298	MAPK8IP2	22925	gene:ENSOMYG00000076455	174246
1	34838201..34838400		10	1	26	2.6	21	0.807692	1	19	1.9	7	0.368421	0.00340112	MAPK8IP2	36525	gene:ENSOMYG00000076455	160646
1	34852401..34852600		10	1	15	1.5	15	1	1	21	2.1	13	0.619048	0.00672464	MAPK8IP2	50725	gene:ENSOMYG00000076455	146446
1	34904601..34904800		20	1	45	2.25	36	0.8	1	33	1.65	17	0.515152	0.00784615	MAPK8IP2	102925	gene:ENSOMYG00000076455	94246
1	34905401..34905600		14	1	27	1.92857	27	1	1	22	1.57143	16	0.727273	0.00533567	MAPK8IP2	103725	gene:ENSOMYG00000076455	93446
1	35049201..35049400		10	1	22	2.2	22	1	1	19	1.9	12	0.631579	0.00224127	gene:ENSOMYG00000076455	47739	gene:ENSOMYG00000048373	150134
1	35155001..35155200		11	1	35	3.18182	32	0.914286	1	31	2.81818	20	0.645161	0.00834002	gene:ENSOMYG00000076455	153539	gene:ENSOMYG00000048373	44334
1	35199201..35199400		12	1	30	2.5	29	0.966667	1	10	0.833333	6	0.6	0.00995733	gene:ENSOMYG00000076455	197739	gene:ENSOMYG00000048373	134
1	35249401..35249600		8	1	12	1.5	12	1	1	4	0.5	1	0.25	0.00714286	gene:ENSOMYG00000059134	29611	SHANK3	11474	transcript:ENSOMYT00000165826
1	35249601..35249800		6	1	11	1.83333	11	1	1	9	1.5	3	0.333333	0.00216718	gene:ENSOMYG00000059134	29811	SHANK3	11274	transcript:ENSOMYT00000165826
1	35273801..35274000		26	1	40	1.53846	38	0.95	1	32	1.23077	20	0.625	0.000637447	SHANK3	0	rabl2	8596	SHANK3-201
1	35292201..35292400		6	1	16	2.66667	16	1	1	17	2.83333	10	0.588235	0.00455238	gene:ENSOMYG00000014609	3810	gene:ENSOMYG00000014621	21702
1	35312201..35312400		11	1	15	1.36364	13	0.866667	1	13	1.18182	4	0.307692	0.00369947	gene:ENSOMYG00000014609	23810	gene:ENSOMYG00000014621	1702
1	35361801..35362000		22	1	23	1.04545	22	0.956522	1	39	1.77273	26	0.666667	0.00694317	gene:ENSOMYG00000014621	46000	gene:ENSOMYG00000056339	224488
1	35394601..35394800		8	1	19	2.375	16	0.842105	1	25	3.125	11	0.44	0.00716551	gene:ENSOMYG00000014621	78800	gene:ENSOMYG00000056339	191688
1	35438801..35439000		24	1	79	3.29167	67	0.848101	1	116	4.83333	71	0.612069	0.000249968	gene:ENSOMYG00000014621	123000	gene:ENSOMYG00000056339	147488
1	35501401..35501600		8	1	22	2.75	9	0.409091	1	13	1.625	0	0	0.00704486	gene:ENSOMYG00000014621	185600	gene:ENSOMYG00000056339	84888
1	35556401..35556600		9	1	20	2.22222	19	0.95	1	6	0.666667	1	0.166667	0.000525561	gene:ENSOMYG00000014621	240600	gene:ENSOMYG00000056339	29888
[truncated: 40,522 more rows]

## Sheet: sup8
									Table S8: Complete list of differentially hypo- methylated regions in LD vs. HD group
[truncated: 35,572 more rows]

[truncated: 3 more sheets: sup9, sup10, sup11]
